# Supplementary material for: Peptidases Compartmentalized to the Ascaris suum Intestinal Lumen and Apical Intestinal Membrane
Source: PLoS Negl Trop Dis. 2015 Jan 8;9(1):e3375. doi: 10.1371/journal.pntd.0003375 (PMC4287503; doi:10.1371/journal.pntd.0003375)
Supplement: S1 Table — Ascaris suum protein annotation and proteomics data. (XLSX) [file pntd.0003375.s002.xlsx]

## Sheet: Table S1
	Supporting Table S1: Ascaris suum protein annotation and proteomics data
								Annotation / Protein and Gene Properties
								Misc Annotation					Computational Secretion Prediction			Proteomics Data (Number of Spectra mapped per protein)
	Gene Name	Protein Detection						KEGG	Interpro domain	Gene Ontology	NR database top hit (Jex et al Nature 2011)	Transmembrane Domain (Phobius)	Signal peptides (Phobius)	Non-Classical Secretion (SecretomeP)		PBS perfusate	4MU perfusate	Pseudocoelomic fluid	P2 pellet	ConA fractions
		ConA	PBS perfusate	4MU perfusate	Pseudocoelomic fluid	P2 pellet														Sum of all ConA Fractions	1 (HMW)	2	3	4	5	6	7	8	9	10	11	12	13 (LMW)
	GS_08219	Y	Y	Y	Y	Y		-	IPR008753-Peptidase M13 IPR018497-Peptidase M13, neprilysin, C-terminal IPR000718-Peptidase M13, neprilysin	Biological Process: proteolysis (GO:0006508), Molecular Function: metalloendopeptidase activity (GO:0004222), Molecular Function: metallopeptidase activity (GO:0008237)	Peptidase%MER162857 - family M13 unassigned peptidases (Caenorhabditis elegans) [M13.UPW]#M13#%752%42.2872340425532%1e-167	-	Y	-		11	212	1	64	40	0	0	40	0	0	0	0	0	0	0	0	0	0
	GS_08343	Y	Y	Y	Y	Y		-	IPR002035-von Willebrand factor, type A IPR001304-C-type lectin IPR016187-C-type lectin fold IPR016186-C-type lectin-like	Molecular Function: binding (GO:0005488), Molecular Function: protein binding (GO:0005515)	sp|A6H584|CO6A5_MOUSE%%Collagen alpha-5(VI) chain OS=Mus musculus GN=Col29a1 PE=1 SV=2%%0	-	Y	-		60	32	14	13	16	0	0	0	0	0	0	0	0	0	0	0	0	16
	GS_21295	Y	Y	Y	Y	Y		K01689-enolase	IPR000941-Enolase IPR020809-Enolase, conserved site IPR020811-Enolase, N-terminal IPR020810-Enolase, C-terminal	Biological Process: glycolysis (GO:0006096), Cellular Component: phosphopyruvate hydratase complex (GO:0000015), Molecular Function: magnesium ion binding (GO:0000287), Molecular Function: phosphopyruvate hydratase activity (GO:0004634)	cel:T21B10.2 enol-1; ENOLase family member (enol-1); K01689 enolase [EC:4.2.1.11]%435%86.2068965517241%0.0	-	-	Y		10	17	3	30	16	0	0	0	0	0	0	0	0	0	0	0	16	0
	GS_23920	Y	Y	Y	-	Y		-	-	-	T16G12.1%CE36716 WBGene00011803 Aminopeptidase status:Partially_confirmed UniProt:Q22531_CAEEL protein_id:CAA82971.4%HMM_hit%5.3e-53	-	-	Y		2	2	0	5	5	0	0	0	0	0	0	0	0	5	0	0	0	0
	GS_14901	Y	Y	Y	-	Y		-	IPR009007-Peptidase aspartic, catalytic IPR001461-Peptidase A1 IPR021109-Peptidase aspartic IPR001969-Peptidase aspartic, active site	Biological Process: proteolysis (GO:0006508), Molecular Function: aspartic-type endopeptidase activity (GO:0004190)	Peptidase%MER106015 - necepsin-1 (Caenorhabditis briggsae) [A01.053]#A01A#%331%48.036253776435%5e-88	-	Y	-		1	5	0	7	4	0	0	0	0	0	0	0	0	0	0	0	4	0
	GS_15316	Y	Y	Y	-	Y		-	IPR009007-Peptidase aspartic, catalytic IPR001461-Peptidase A1 IPR021109-Peptidase aspartic IPR001969-Peptidase aspartic, active site	Biological Process: proteolysis (GO:0006508), Molecular Function: aspartic-type endopeptidase activity (GO:0004190)	Peptidase%MER106015 - necepsin-1 (Caenorhabditis briggsae) [A01.053]#A01A#%331%49.8489425981873%2e-89	-	Y	-		3	2	0	8	4	0	0	0	0	0	0	0	0	0	0	0	0	4
	GS_19445	Y	Y	Y	-	Y		-	IPR009007-Peptidase aspartic, catalytic IPR001461-Peptidase A1 IPR021109-Peptidase aspartic IPR001969-Peptidase aspartic, active site	Biological Process: proteolysis (GO:0006508), Molecular Function: aspartic-type endopeptidase activity (GO:0004190)	Peptidase%MER106014 - necepsin-1 (Caenorhabditis briggsae) [A01.053]#A01A#%331%51.6616314199396%5e-93	-	Y	-		1	4	0	7	18	0	0	0	0	0	0	0	0	0	0	0	18	0
	GS_04166	Y	Y	Y	-	Y		-	IPR014782-Peptidase M1, membrane alanine aminopeptidase, N-terminal IPR001930-Peptidase M1, alanine aminopeptidase/leukotriene A4 hydrolase	Biological Process: proteolysis (GO:0006508), Molecular Function: metallopeptidase activity (GO:0008237), Molecular Function: zinc ion binding (GO:0008270)	Peptidase%MER171631 - family M1 unassigned peptidases (Caenorhabditis elegans) [M01.UPW]#M01#%210%48.5714285714286%2e-51	-	-	Y		6	9	0	36	24	0	0	0	0	24	0	0	0	0	0	0	0	0
	GS_05746	Y	Y	Y	-	Y		-	IPR014782-Peptidase M1, membrane alanine aminopeptidase, N-terminal IPR001930-Peptidase M1, alanine aminopeptidase/leukotriene A4 hydrolase	Biological Process: proteolysis (GO:0006508), Molecular Function: metallopeptidase activity (GO:0008237), Molecular Function: zinc ion binding (GO:0008270)	Peptidase%MER125837 - family M1 unassigned peptidases (Caenorhabditis briggsae) [M01.UPW]#M01#%207%52.1739130434783%1e-58	-	Y	-		8	9	0	47	4	0	0	0	0	0	0	0	4	0	0	0	0	0
	GS_16285	Y	Y	Y	-	Y		-	IPR014782-Peptidase M1, membrane alanine aminopeptidase, N-terminal IPR001930-Peptidase M1, alanine aminopeptidase/leukotriene A4 hydrolase	Biological Process: proteolysis (GO:0006508), Molecular Function: metallopeptidase activity (GO:0008237), Molecular Function: zinc ion binding (GO:0008270)	Peptidase%MER002422 - family M1 unassigned peptidases (Caenorhabditis elegans) [M01.UPW]#M01#%204%50%6e-58	-	-	Y		1	2	0	36	2	0	0	0	2	0	0	0	0	0	0	0	0	0
	GS_03841	Y	Y	Y	-	Y		-	IPR018202-Peptidase S10, serine carboxypeptidase, active site IPR001563-Peptidase S10, serine carboxypeptidase	Biological Process: proteolysis (GO:0006508), Molecular Function: serine-type carboxypeptidase activity (GO:0004185)	Peptidase%MER004128 - serine carboxypeptidase A (Caenorhabditis elegans) [S10.002]#S10#%960%40.3125%0.0	-	Y	-		3	4	0	55	27	0	0	0	0	27	0	0	0	0	0	0	0	0
	GS_23879	Y	Y	Y	-	Y		K12047-maltase-glucoamylase	IPR000519-P-type trefoil IPR000322-Glycoside hydrolase, family 31 IPR017853-Glycoside hydrolase, superfamily IPR011013-Glycoside hydrolase-type carbohydrate-binding	Biological Process: carbohydrate metabolic process (GO:0005975), Molecular Function: carbohydrate binding (GO:0030246), Molecular Function: catalytic activity (GO:0003824), Molecular Function: hydrolase activity, hydrolyzing O-glycosyl compounds (GO:0004553)	sp|O43451|MGA_HUMAN%%Maltase-glucoamylase, intestinal OS=Homo sapiens GN=MGAM PE=1 SV=5%%0	-	-	Y		12	27	0	58	22	22	0	0	0	0	0	0	0	0	0	0	0	0
	GS_15893	Y	Y	Y	-	Y		-	IPR000519-P-type trefoil IPR000322-Glycoside hydrolase, family 31	Biological Process: carbohydrate metabolic process (GO:0005975), Molecular Function: hydrolase activity, hydrolyzing O-glycosyl compounds (GO:0004553)	bmy:Bm1_40580 Glycosyl hydrolases family 31 protein; K01187 alpha-glucosidase [EC:3.2.1.20]%272%34.5588235294118%9e-33	Y	-	Y		1	3	0	6	11	11	0	0	0	0	0	0	0	0	0	0	0	0
	GS_18934	Y	Y	Y	-	Y		-	IPR000322-Glycoside hydrolase, family 31	Biological Process: carbohydrate metabolic process (GO:0005975), Molecular Function: hydrolase activity, hydrolyzing O-glycosyl compounds (GO:0004553)	sp|O43451|MGA_HUMAN%%Maltase-glucoamylase, intestinal OS=Homo sapiens GN=MGAM PE=1 SV=5%%7.3e-183	Y	-	-		2	2	0	7	8	8	0	0	0	0	0	0	0	0	0	0	0	0
	GS_00096	Y	Y	Y	-	Y		-	IPR000322-Glycoside hydrolase, family 31 IPR017853-Glycoside hydrolase, superfamily IPR011013-Glycoside hydrolase-type carbohydrate-binding	Biological Process: carbohydrate metabolic process (GO:0005975), Molecular Function: carbohydrate binding (GO:0030246), Molecular Function: catalytic activity (GO:0003824), Molecular Function: hydrolase activity, hydrolyzing O-glycosyl compounds (GO:0004553)	sp|P07768|SUIS_RABIT%%Sucrase-isomaltase, intestinal OS=Oryctolagus cuniculus GN=SI PE=1 SV=3%%2e-276	-	Y	Y		1	6	0	16	6	0	0	0	0	0	6	0	0	0	0	0	0	0
	GS_19777	Y	Y	Y	-	Y		K01203-sucrase-isomaltase / oligo-1,6-glucosidase	IPR000519-P-type trefoil IPR000322-Glycoside hydrolase, family 31 IPR017853-Glycoside hydrolase, superfamily IPR011013-Glycoside hydrolase-type carbohydrate-binding	Biological Process: carbohydrate metabolic process (GO:0005975), Molecular Function: carbohydrate binding (GO:0030246), Molecular Function: catalytic activity (GO:0003824), Molecular Function: hydrolase activity, hydrolyzing O-glycosyl compounds (GO:0004553)	sp|A1CNK4|AGDC_ASPCL%%Probable alpha/beta-glucosidase agdC OS=Aspergillus clavatus GN=agdC PE=3 SV=1%%0	Y	-	Y		5	18	0	50	31	0	0	0	0	0	0	0	0	0	17	14	0	0
	GS_08951	Y	Y	Y	-	Y		-	IPR002035-von Willebrand factor, type A	Molecular Function: protein binding (GO:0005515)	Hypothetical protein	-	Y	-		7	14	0	54	9	0	0	0	0	0	0	0	0	0	0	9	0	0
	GS_05584	Y	-	Y	-	Y		-	IPR001930-Peptidase M1, alanine aminopeptidase/leukotriene A4 hydrolase	Biological Process: proteolysis (GO:0006508)	sp|P15684|AMPN_RAT%%Aminopeptidase N OS=Rattus norvegicus GN=Anpep PE=1 SV=2%%7.1e-202	-	-	Y		0	6	0	18	24	0	0	3	7	9	0	0	0	5	0	0	0	0
	GS_22704	Y	-	Y	-	Y		-	IPR018202-Peptidase S10, serine carboxypeptidase, active site IPR001563-Peptidase S10, serine carboxypeptidase	Biological Process: proteolysis (GO:0006508), Molecular Function: serine-type carboxypeptidase activity (GO:0004185)	Peptidase%MER004128 - serine carboxypeptidase A (Caenorhabditis elegans) [S10.002]#S10#%1191%45.2560873215785%0.0	-	-	Y		0	6	0	44	9	0	0	9	0	0	0	0	0	0	0	0	0	0
	GS_13055	Y	-	Y	-	Y		K01966-propionyl-CoA carboxylase beta chain	IPR011762-Acetyl-coenzyme A carboxyltransferase, N-terminal IPR011763-Acetyl-coenzyme A carboxyltransferase, C-terminal IPR000022-Carboxyl transferase	Molecular Function: ligase activity (GO:0016874)	Channels and Transporters%gnl|TC-DB|Q57079%3%Primary active transporters%3.B.%Decarboxylation-driven transporters%3.B.1% Na+-transporting Carboxylic Acid Decarboxylase (NaT-DC) Family.%3.B.1.1.2% Na+-transporting Carboxylic Acid Decarboxylase (NaT-DC) Family.%"ALPHA-SUBUNIT,METHYLMALONYL-COA DECARBOXYLASE - Veillonella parvula."%507%57.00197239%1.00E-171	-	Y	Y		0	13	0	72	55	10	0	0	0	8	0	7	0	6	9	8	7	0
	GS_14784	Y	-	Y	-	Y		K00814-alanine transaminase	IPR015421-Pyridoxal phosphate-dependent transferase, major region, subdomain 1 IPR015422-Pyridoxal phosphate-dependent transferase, major region, subdomain 2 IPR004839-Aminotransferase, class I/classII IPR015424-Pyridoxal phosphate-dependent transferase, major domain	Biological Process: biosynthetic process (GO:0009058), Molecular Function: catalytic activity (GO:0003824), Molecular Function: pyridoxal phosphate binding (GO:0030170), Molecular Function: transferase activity, transferring nitrogenous groups (GO:0016769)	sp|Q28DB5|ALAT2_XENTR%%Alanine aminotransferase 2 OS=Xenopus tropicalis GN=gpt2 PE=2 SV=1%%8.2e-179	-	-	Y		0	2	0	12	4	3	0	0	0	1	0	0	0	0	0	0	0	0
	GS_10842	Y	-	Y	-	Y		-	-	-	Hypothetical protein	-	-	-		0	2	0	6	9	0	0	0	0	0	9	0	0	0	0	0	0	0
	GS_19074	Y	-	Y	-	Y		K08057-calreticulin	IPR009033-Calreticulin/calnexin, P IPR013320-Concanavalin A-like lectin/glucanase, subgroup IPR001580-Calreticulin/calnexin IPR008985-Concanavalin A-like lectin/glucanase IPR018124-Calreticulin/calnexin, conserved site	Biological Process: protein folding (GO:0006457), Cellular Component: endoplasmic reticulum (GO:0005783), Molecular Function: calcium ion binding (GO:0005509), Molecular Function: unfolded protein binding (GO:0051082)	cbr:CBG09253 Cbr-crt-1; C. briggsae CBR-CRT-1 protein; K08057 calreticulin%385%71.1688311688312%1e-151	-	Y	-		0	1	0	10	3	0	0	0	0	0	0	0	0	0	3	0	0	0
	GS_01900	Y	-	Y	-	Y		K01965-propionyl-CoA carboxylase alpha chain	IPR016185-PreATP-grasp-like fold IPR013817-Pre-ATP-grasp fold IPR013816-ATP-grasp fold, subdomain 2 IPR005482-Biotin carboxylase, C-terminal IPR011761-ATP-grasp fold IPR011053-Single hybrid motif IPR013815-ATP-grasp fold, subdomain 1 IPR011764-Biotin carboxylation domain IPR005479-Carbamoyl-phosphate synthetase, large subunit, ATP-binding IPR011054-Rudiment single hybrid motif IPR000089-Biotin/li…	Biological Process: metabolic process (GO:0008152), Molecular Function: ATP binding (GO:0005524), Molecular Function: biotin carboxylase activity (GO:0004075), Molecular Function: catalytic activity (GO:0003824), Molecular Function: ligase activity (GO:0016874), Molecular Function: metal ion binding (GO:0046872)	Channels and Transporters%gnl|TC-DB|Q9V0A6%3%Primary active transporters%3.B.%Decarboxylation-driven transporters%3.B.1% Na+-transporting Carboxylic Acid Decarboxylase (NaT-DC) Family.%3.B.1.1.5% Na+-transporting Carboxylic Acid Decarboxylase (NaT-DC) Family.%Methylmalonyl-CoA decarboxylase gamma chain - Pyrococcus abyssi.%67%46.26865672%1.00E-09	-	-	Y		0	24	0	59	8	0	0	0	0	0	0	0	0	0	0	5	3	0
	GS_12574	Y	-	-	-	Y		K01379-cathepsin D	IPR001461-Peptidase A1 IPR009007-Peptidase aspartic, catalytic IPR021109-Peptidase aspartic IPR001969-Peptidase aspartic, active site	Biological Process: proteolysis (GO:0006508), Molecular Function: aspartic-type endopeptidase activity (GO:0004190)	Peptidase%MER204670 - necepsin-2 (Anisakis simplex) [A01.068]#A01A#%331%80.3625377643504%1e-163	-	Y	-		0	0	0	8	4	0	0	0	0	0	0	0	0	0	0	0	0	4
	GS_16354	Y	-	-	-	Y		-	IPR000519-P-type trefoil IPR000322-Glycoside hydrolase, family 31 IPR011013-Glycoside hydrolase-type carbohydrate-binding IPR017853-Glycoside hydrolase, superfamily	Biological Process: carbohydrate metabolic process (GO:0005975), Molecular Function: carbohydrate binding (GO:0030246), Molecular Function: catalytic activity (GO:0003824), Molecular Function: hydrolase activity, hydrolyzing O-glycosyl compounds (GO:0004553)	sp|P07768|SUIS_RABIT%%Sucrase-isomaltase, intestinal OS=Oryctolagus cuniculus GN=SI PE=1 SV=3%%2.5e-265	-	-	Y		0	0	0	6	14	14	0	0	0	0	0	0	0	0	0	0	0	0
	GS_21785	Y	-	-	-	-		-	-	-	bmy:Bm1_40130 MGC80013 protein%742%61.0512129380054%0.0	-	-	Y		0	0	0	0	4	0	0	0	0	0	0	4	0	0	0	0	0	0
	GS_09871	-	Y	Y	Y	Y		-	IPR002919-Protease inhibitor I8, cysteine-rich trypsin inhibitor-like	-	Peptidase Inhibitor%MER029345 - chymotrypsin/elastase inhibitor {{Ascaris}-type} (Ascaris lumbricoides) [I08.001]#I08#%63%93.6507936507936%3e-28	-	-	-		19	3	56	1	0	0	0	0	0	0	0	0	0	0	0	0	0	0
	GS_20378	-	Y	Y	Y	Y		K01596-phosphoenolpyruvate carboxykinase (GTP)	IPR008210-Phosphoenolpyruvate carboxykinase, N-terminal IPR008209-Phosphoenolpyruvate carboxykinase, GTP-utilising IPR018091-Phosphoenolpyruvate carboxykinase, GTP-utilising, conserved site	Biological Process: gluconeogenesis (GO:0006094), Molecular Function: GTP binding (GO:0005525), Molecular Function: phosphoenolpyruvate carboxykinase (GTP) activity (GO:0004613), Molecular Function: phosphoenolpyruvate carboxykinase activity (GO:0004611), Molecular Function: purine nucleotide binding (GO:0017076)	bmy:Bm1_25195 phosphoenolpyruvate carboxykinase [GTP]; K01596 phosphoenolpyruvate carboxykinase (GTP) [EC:4.1.1.32]%381%82.4146981627297%0.0	-	-	Y		10	15	6	9	0	0	0	0	0	0	0	0	0	0	0	0	0	0
	GS_14239	-	Y	Y	Y	Y		-	IPR001534-Transthyretin-like	Cellular Component: extracellular space (GO:0005615)	bmy:Bm1_04380 Transthyretin-like family protein%123%81.3008130081301%8e-56	-	-	-		6	3	7	1	0	0	0	0	0	0	0	0	0	0	0	0	0	0
	GS_04959	-	Y	Y	Y	Y		-	IPR013035-Phosphoenolpyruvate carboxykinase, C-terminal IPR008209-Phosphoenolpyruvate carboxykinase, GTP-utilising	Biological Process: gluconeogenesis (GO:0006094), Molecular Function: GTP binding (GO:0005525), Molecular Function: phosphoenolpyruvate carboxykinase activity (GO:0004611), Molecular Function: purine nucleotide binding (GO:0017076)	bmy:Bm1_25195 phosphoenolpyruvate carboxykinase [GTP]; K01596 phosphoenolpyruvate carboxykinase (GTP) [EC:4.1.1.32]%243%85.1851851851852%1e-125	-	-	Y		4	15	8	6	0	0	0	0	0	0	0	0	0	0	0	0	0	0
	GS_19276	-	Y	Y	Y	Y		K01623-fructose-bisphosphate aldolase, class I	IPR000741-Fructose-bisphosphate aldolase, class-I IPR013785-Aldolase-type TIM barrel	Biological Process: glycolysis (GO:0006096), Biological Process: metabolic process (GO:0008152), Molecular Function: catalytic activity (GO:0003824), Molecular Function: fructose-bisphosphate aldolase activity (GO:0004332)	bmy:Bm1_15350 fructose-bisphosphate aldolase 1; K01623 fructose-bisphosphate aldolase, class I [EC:4.1.2.13]%403%77.1712158808933%1e-173	Y	-	-		4	13	2	4	0	0	0	0	0	0	0	0	0	0	0	0	0	0
	GS_23138	-	Y	Y	Y	Y		-	IPR001395-Aldo/keto reductase IPR023210-NADP-dependent oxidoreductase domain IPR020471-Aldo/keto reductase subgroup IPR018170-Aldo/keto reductase, conserved site	Biological Process: oxidation-reduction process (GO:0055114), Molecular Function: oxidoreductase activity (GO:0016491)	Channels and Transporters%gnl|TC-DB|Q14722%8%Accessory factors involved in transport%8.A.%Auxillary transport proteins%8.A.5% Voltage-gated K+ Channel beta-subunit (Kvbeta) Family.%8.A.5.1.1% Voltage-gated K+ Channel beta-subunit (Kvbeta) Family.%Voltage-gated potassium channel beta-1 subunit (K+ channel beta-1 subunit) (Kv-beta-1) - Homo sapiens (Human).%130%31.53846154%9.00E-07	-	-	Y		4	8	4	4	0	0	0	0	0	0	0	0	0	0	0	0	0	0
	GS_04178	-	Y	Y	Y	Y		K04455-heat shock 27kDa protein 1	IPR001436-Alpha crystallin/Heat shock protein IPR002068-Heat shock protein Hsp20 IPR008978-HSP20-like chaperone	Biological Process: response to heat (GO:0009408)	bmy:Bm1_14535 Small heat shock protein OV25-1%157%52.2292993630573%3e-44	-	-	-		3	5	3	11	0	0	0	0	0	0	0	0	0	0	0	0	0	0
	GS_00857	-	Y	Y	Y	Y		K01803-triosephosphate isomerase (TIM)	IPR000652-Triosephosphate isomerase IPR013785-Aldolase-type TIM barrel IPR020861-Triosephosphate isomerase, active site	Biological Process: metabolic process (GO:0008152), Molecular Function: catalytic activity (GO:0003824), Molecular Function: triose-phosphate isomerase activity (GO:0004807)	bmy:Bm1_29130 triosephosphate isomerase; K01803 triosephosphate isomerase (TIM) [EC:5.3.1.1]%246%83.739837398374%1e-114	-	-	-		2	11	5	3	0	0	0	0	0	0	0	0	0	0	0	0	0	0
	GS_05590	-	Y	Y	Y	Y		K06630-tyrosine 3-monooxygenase/tryptophan 5-monooxygenase activation protein	IPR023409-14-3-3 protein, conserved site IPR023410-14-3-3 domain IPR000308-14-3-3 protein	Molecular Function: protein domain specific binding (GO:0019904)	cbr:CBG17289 Cbr-ftt-2; C. briggsae CBR-FTT-2 protein; K06630 tyrosine 3-monooxygenase/tryptophan 5-monooxygenase activation protein%295%77.6271186440678%1e-123	-	-	-		2	11	3	8	0	0	0	0	0	0	0	0	0	0	0	0	0	0
	GS_01940	-	Y	Y	Y	Y		K01810-glucose-6-phosphate isomerase	IPR001672-Phosphoglucose isomerase (PGI) IPR018189-Phosphoglucose isomerase, conserved site IPR023096-Phosphoglucose isomerase, C-terminal	Biological Process: gluconeogenesis (GO:0006094), Biological Process: glycolysis (GO:0006096), Molecular Function: glucose-6-phosphate isomerase activity (GO:0004347)	cbr:CBG08037 Cbr-gpi-1; C. briggsae CBR-GPI-1 protein; K01810 glucose-6-phosphate isomerase [EC:5.3.1.9]%597%63.4840871021776%0.0	-	-	Y		1	1	1	1	0	0	0	0	0	0	0	0	0	0	0	0	0	0
	GS_11140	-	Y	Y	Y	Y		K00939-adenylate kinase	IPR000850-Adenylate kinase IPR006267-Adenylate kinase, isozyme 1	Biological Process: ATP metabolic process (GO:0046034), Biological Process: nucleobase, nucleoside, nucleotide and nucleic acid metabolic process (GO:0006139), Cellular Component: cytoplasm (GO:0005737), Molecular Function: adenylate kinase activity (GO:0004017), Molecular Function: ATP binding (GO:0005524), Molecular Function: nucleobase, nucleoside, nucleotide kinase activity (GO:0019205)	bmy:Bm1_13790 adenylate kinase isoenzyme 1 (EC:2.7.4.3); K00939 adenylate kinase [EC:2.7.4.3]%185%83.7837837837838%4e-90	-	-	-		1	7	3	8	0	0	0	0	0	0	0	0	0	0	0	0	0	0
	GS_15602	-	Y	Y	Y	Y		K03768-peptidyl-prolyl cis-trans isomerase B (cyclophilin B)	IPR020892-Peptidyl-prolyl cis-trans isomerase, cyclophilin-type, conserved site IPR002130-Peptidyl-prolyl cis-trans isomerase, cyclophilin-type IPR015891-Cyclophilin-like	Biological Process: protein folding (GO:0006457), Molecular Function: peptidyl-prolyl cis-trans isomerase activity (GO:0003755)	bmy:Bm1_24035 cyclophilin-type peptidyl-prolyl cis-trans isomerase-15, Bmcyp-5; K03768 peptidyl-prolyl cis-trans isomerase B (cyclophilin B) [EC:5.2.1.8]%203%74.8768472906404%4e-86	Y	-	-		1	3	1	7	0	0	0	0	0	0	0	0	0	0	0	0	0	0
	GS_17449	-	Y	Y	Y	Y		K04079-molecular chaperone HtpG	IPR019805-Heat shock protein Hsp90, conserved site IPR020575-Heat shock protein Hsp90, N-terminal IPR020568-Ribosomal protein S5 domain 2-type fold IPR003594-ATPase-like, ATP-binding domain IPR001404-Heat shock protein Hsp90	Biological Process: protein folding (GO:0006457), Biological Process: response to stress (GO:0006950), Molecular Function: ATP binding (GO:0005524), Molecular Function: unfolded protein binding (GO:0051082)	bmy:Bm1_51495 heat shock protein 90; K04079 molecular chaperone HtpG%724%87.5690607734807%0.0	-	-	-		1	16	1	30	0	0	0	0	0	0	0	0	0	0	0	0	0	0
	GS_21141	-	Y	Y	Y	Y		-	IPR017942-Lipid-binding serum glycoprotein, N-terminal IPR017943-Bactericidal permeability-increasing protein, alpha/beta domain IPR001124-Lipid-binding serum glycoprotein, C-terminal	Molecular Function: lipid binding (GO:0008289)	Channels and Transporters%gnl|TC-DB|P17213%1%Channel/pores%1.C.%pore-forming toxins (proteins and peptides)%1.C.4% Channel-forming toxins%1.C.40.1.1% Aerolysin Channel-forming Toxin (Aerolysin) Family.; Bactericidal Permeability Increasing Protein (BPIP) Family.%BACTERICIDAL PERMEABILITY-INCREASING PROTEIN PRECURSOR (BPI) (CAP 57) - Homo sapiens (Human).%174%20.68965517%5.00E-06	-	Y	-		1	1	10	1	0	0	0	0	0	0	0	0	0	0	0	0	0	0
	GS_23687	-	Y	Y	Y	Y		K01674-carbonic anhydrase	IPR018338-Carbonic anhydrase, alpha-class, conserved site IPR023561-Carbonic anhydrase, alpha-class IPR001148-Carbonic anhydrase, alpha-class, catalytic domain	Biological Process: one-carbon metabolic process (GO:0006730), Molecular Function: carbonate dehydratase activity (GO:0004089), Molecular Function: zinc ion binding (GO:0008270)	cel:K05G3.3 cah-3; Carbonic AnHydrase family member (cah-3); K01674 carbonic anhydrase [EC:4.2.1.1]%245%61.2244897959184%1e-85	-	-	Y		1	4	1	2	0	0	0	0	0	0	0	0	0	0	0	0	0	0
	GS_20234	-	Y	Y	Y	Y		-	IPR009071-High mobility group, superfamily	Molecular Function: protein binding (GO:0005515)	sp|Q06811|ABA1_ASCSU%%Polyprotein ABA-1 (Fragment) OS=Ascaris suum GN=ABA-1 PE=1 SV=2%%0	-	Y	-		617	154	974	22	0	0	0	0	0	0	0	0	0	0	0	0	0	0
	GS_08371	-	Y	Y	Y	Y		-	IPR000971-Globin, subset IPR009050-Globin-like IPR012292-Globin	Biological Process: oxygen transport (GO:0015671), Molecular Function: heme binding (GO:0020037), Molecular Function: iron ion binding (GO:0005506), Molecular Function: oxygen binding (GO:0019825)	cbr:CBG06867 Cbr-glb-1; C. briggsae CBR-GLB-1 protein%156%38.4615384615385%2e-27	-	Y	-		31	42	77	11	0	0	0	0	0	0	0	0	0	0	0	0	0	0
	GS_07489	-	Y	Y	Y	Y		-	IPR008632-Nematode fatty acid retinoid binding	Molecular Function: lipid binding (GO:0008289)	bmy:Bm1_41425 BM20%153%56.8627450980392%1e-46	-	Y	-		183	19	9	5	0	0	0	0	0	0	0	0	0	0	0	0	0	0
	GS_11674	-	Y	Y	Y	Y		-	IPR015819-Lipid transport protein, beta-sheet shell IPR015255-Vitellinogen, open beta-sheet IPR015818-Vitellinogen, open beta-sheet, subdomain 2	Biological Process: lipid transport (GO:0006869), Molecular Function: lipid transporter activity (GO:0005319)	sp|Q9U943|APLP_LOCMI%%Apolipophorins OS=Locusta migratoria PE=1 SV=2%%2.8e-91	Y	-	Y		38	39	199	9	0	0	0	0	0	0	0	0	0	0	0	0	0	0
	GS_15314	-	Y	Y	Y	Y		-	IPR001846-von Willebrand factor, type D domain	-	sp|Q9Y6R7|FCGBP_HUMAN%%IgGFc-binding protein OS=Homo sapiens GN=FCGBP PE=1 SV=3%%0	-	-	Y		38	27	55	12	0	0	0	0	0	0	0	0	0	0	0	0	0	0
	GS_10956	-	Y	Y	Y	Y		-	IPR015819-Lipid transport protein, beta-sheet shell IPR015255-Vitellinogen, open beta-sheet IPR011030-Vitellinogen, superhelical IPR015818-Vitellinogen, open beta-sheet, subdomain 2 IPR001747-Lipid transport protein, N-terminal IPR001846-von Willebrand factor, type D domain IPR015817-Vitellinogen, open beta-sheet, subdomain 1 IPR015816-Vitellinogen, beta-sheet N-terminal	Biological Process: lipid transport (GO:0006869), Molecular Function: lipid transporter activity (GO:0005319)	cel:C04F6.1 vit-5; VITellogenin structural genes (yolk protein genes) family member (vit-5)%1736%32.4308755760369%0.0	-	Y	-		82	74	275	2	0	0	0	0	0	0	0	0	0	0	0	0	0	0
	GS_02516	-	Y	Y	Y	Y		-	IPR001534-Transthyretin-like	Cellular Component: extracellular space (GO:0005615)	cel:T07C12.7 ttr-46; TransThyretin-Related family domain family member (ttr-46)%155%64.5161290322581%7e-54	-	Y	-		3	3	11	1	0	0	0	0	0	0	0	0	0	0	0	0	0	0
	GS_10334	-	Y	Y	Y	Y		-	IPR001534-Transthyretin-like	Cellular Component: extracellular space (GO:0005615)	bmy:Bm1_06445 Transthyretin-like family protein%83%77.1084337349398%5e-32	-	Y	-		5	11	12	7	0	0	0	0	0	0	0	0	0	0	0	0	0	0
	GS_06140	-	Y	Y	Y	Y		-	IPR013320-Concanavalin A-like lectin/glucanase, subgroup IPR008985-Concanavalin A-like lectin/glucanase IPR001079-Galectin, carbohydrate recognition domain	Molecular Function: sugar binding (GO:0005529)	Channels and Transporters%gnl|TC-DB|P97840%9%Incompletely characterized transport systems%9.B.%Putative transport proteins%9.B.9% Urate Transporter (UAT) Family.%9.B.9.1.1% Urate Transporter (UAT) Family.%GALECTIN-9 (36 KDA BETA-GALACTOSIDE BINDING LECTIN) (URATE TRANSPORTER/CHANNEL) (UAT) - Rattus norvegicus (Rat).%118%33.89830508%2.00E-14	-	Y	-		9	14	1	8	0	0	0	0	0	0	0	0	0	0	0	0	0	0
	GS_07669	-	Y	Y	Y	Y		-	IPR001534-Transthyretin-like	Cellular Component: extracellular space (GO:0005615)	cbr:CBG19413 Cbr-ttr-46; C. briggsae CBR-TTR-46 protein%139%59.7122302158273%7e-46	-	Y	-		2	3	7	2	0	0	0	0	0	0	0	0	0	0	0	0	0	0
	GS_20415	-	Y	Y	Y	Y		K13443-Niemann-Pick C2 protein	IPR014756-Immunoglobulin E-set IPR003172-MD-2-related lipid-recognition	-	Channels and Transporters%gnl|TC-DB|P61916%2%Electorchemical potential-driven transporters%2.A.%"Porters (uniporters, symporters, antiporters)"%2.A.6% Resistance-Nodulation-Cell Division (RND) Superfamily.%2.A.6.6.1% Resistance-Nodulation-Cell Division (RND) Superfamily.%Epididymal secretory protein E1 precursor (Niemann-Pick disease type C2 protein) (hE1) - Homo sapiens (Human).%150%24.66666667%…	Y	-	-		1	2	6	1	0	0	0	0	0	0	0	0	0	0	0	0	0	0
	GS_16802	-	Y	Y	Y	Y		K00799-glutathione S-transferase	IPR010987-Glutathione S-transferase, C-terminal-like IPR004046-Glutathione S-transferase, C-terminal IPR012335-Thioredoxin fold IPR004045-Glutathione S-transferase, N-terminal IPR017933-Glutathione S-transferase/chloride channel, C-terminal IPR012336-Thioredoxin-like fold	Molecular Function: protein binding (GO:0005515)	cbr:CBG24809 Cbr-gst-7; C. briggsae CBR-GST-7 protein%206%53.8834951456311%5e-57	-	-	-		3	31	1	13	0	0	0	0	0	0	0	0	0	0	0	0	0	0
	GS_20130	-	Y	Y	Y	Y		K00134-glyceraldehyde 3-phosphate dehydrogenase	IPR020830-Glyceraldehyde 3-phosphate dehydrogenase, active site IPR006424-Glyceraldehyde-3-phosphate dehydrogenase, type I IPR020831-Glyceraldehyde/Erythrose phosphate dehydrogenase family IPR016040-NAD(P)-binding domain IPR020828-Glyceraldehyde 3-phosphate dehydrogenase, NAD(P) binding domain IPR020829-Glyceraldehyde 3-phosphate dehydrogenase, catalytic domain	Biological Process: glucose metabolic process (GO:0006006), Biological Process: oxidation-reduction process (GO:0055114), Molecular Function: binding (GO:0005488), Molecular Function: glyceraldehyde-3-phosphate dehydrogenase activity (GO:0008943), Molecular Function: NAD binding (GO:0051287), Molecular Function: oxidoreductase activity, acting on the aldehyde or oxo group of donors, NAD or NADP a…	bmy:Bm1_41940 Glyceraldehyde 3-phosphate dehydrogenase; K00134 glyceraldehyde 3-phosphate dehydrogenase [EC:1.2.1.12]%338%88.7573964497041%1e-175	-	-	-		3	10	6	11	0	0	0	0	0	0	0	0	0	0	0	0	0	0
	GS_06246	-	Y	Y	Y	Y		K00927-phosphoglycerate kinase	IPR015901-Phosphoglycerate kinase, C-terminal IPR015824-Phosphoglycerate kinase, N-terminal IPR001576-Phosphoglycerate kinase IPR015911-Phosphoglycerate kinase, conserved site	Biological Process: glycolysis (GO:0006096), Molecular Function: phosphoglycerate kinase activity (GO:0004618)	bmy:Bm1_01925 Phosphoglycerate kinase; K00927 phosphoglycerate kinase [EC:2.7.2.3]%449%78.173719376392%0.0	-	-	-		5	10	6	10	0	0	0	0	0	0	0	0	0	0	0	0	0	0
	GS_08306	-	Y	Y	Y	Y		-	IPR001534-Transthyretin-like	Cellular Component: extracellular space (GO:0005615)	bmy:Bm1_06445 Transthyretin-like family protein%89%58.4269662921348%1e-25	-	-	-		3	2	1	1	0	0	0	0	0	0	0	0	0	0	0	0	0	0
	GS_04737	-	Y	Y	Y	Y		K14462-apolipoprotein B	IPR015819-Lipid transport protein, beta-sheet shell IPR011030-Vitellinogen, superhelical IPR001747-Lipid transport protein, N-terminal IPR015816-Vitellinogen, beta-sheet N-terminal	Biological Process: lipid transport (GO:0006869), Molecular Function: lipid transporter activity (GO:0005319)	sp|Q90243|VIT_ACITR%%Vitellogenin (Fragment) OS=Acipenser transmontanus PE=2 SV=1%%3.3e-167	-	-	Y		13	38	37	3	0	0	0	0	0	0	0	0	0	0	0	0	0	0
	GS_13048	-	Y	Y	Y	Y		-	-	-	Hypothetical protein	-	-	-		4	8	2	2	0	0	0	0	0	0	0	0	0	0	0	0	0	0
	GS_13808	-	Y	Y	Y	-		-	IPR018097-EGF-like calcium-binding, conserved site IPR003596-Immunoglobulin V-set, subgroup IPR009030-Growth factor, receptor IPR013783-Immunoglobulin-like fold IPR006210-Epidermal growth factor-like IPR003598-Immunoglobulin subtype 2 IPR013098-Immunoglobulin I-set IPR007110-Immunoglobulin-like IPR000152-EGF-type aspartate/asparagine hydroxylation site IPR003599-Immunoglobulin subtype IPR013091-E…	Molecular Function: calcium ion binding (GO:0005509), Molecular Function: protein binding (GO:0005515)	GPCR%Class B%Q9ESC1%Class B Orphans%Class B Orphans%ELTD1%"EGF, latrophilin seven transmembrane domain containing 1, ETL, ETL protein, KPG_003, EGF-TM7-latrophilin-related protein"%170757%114%42.1052631578947%1e-12	Y	-	-		18	6	39	0	0	0	0	0	0	0	0	0	0	0	0	0	0	0
	GS_07029	-	Y	Y	Y	-		-	IPR019791-Haem peroxidase, animal, subgroup IPR013783-Immunoglobulin-like fold IPR002007-Haem peroxidase, animal IPR003598-Immunoglobulin subtype 2 IPR013098-Immunoglobulin I-set IPR010255-Haem peroxidase IPR007110-Immunoglobulin-like IPR003599-Immunoglobulin subtype	Biological Process: oxidation-reduction process (GO:0055114), Biological Process: response to oxidative stress (GO:0006979), Molecular Function: heme binding (GO:0020037), Molecular Function: peroxidase activity (GO:0004601), Molecular Function: protein binding (GO:0005515)	Channels and Transporters%gnl|TC-DB|Q9NRD8%5%Transport electron carriers%5.B.%Transmembrane 1-electron transfer carriers%5.B.1%Transmembrane 1-electron transfer carriers%5.B.1.2.2% Phagocyte (gp91phox) NADPH Oxidase Family.%NADPH THYROID OXIDASE 2 - Homo sapiens (Human).%624%25.16025641%1.00E-34	-	Y	-		6	3	13	0	0	0	0	0	0	0	0	0	0	0	0	0	0	0
	GS_00584	-	Y	Y	Y	-		K06530-CD109 antigen	IPR019742-Alpha-2-macroglobulin, conserved site IPR009048-Alpha-macroglobulin, receptor-binding IPR001599-Alpha-2-macroglobulin IPR002890-Alpha-2-macroglobulin, N-terminal IPR011626-A-macroglobulin complement component IPR008930-Terpenoid cylases/protein prenyltransferase alpha-alpha toroid IPR011625-Alpha-2-macroglobulin, N-terminal 2 IPR019565-Alpha-2-macroglobulin, thiol-ester bond-forming	Cellular Component: extracellular region (GO:0005576), Cellular Component: extracellular space (GO:0005615), Molecular Function: endopeptidase inhibitor activity (GO:0004866)	Peptidase Inhibitor%MER172921 - antigen CD109 (Caenorhabditis briggsae) [I39.006]#I39#%1475%58.7118644067797%0.0	-	Y	-		5	3	36	0	0	0	0	0	0	0	0	0	0	0	0	0	0	0
	GS_01722	-	Y	Y	Y	-		-	-	-	sp|Q23307|YHB8_CAEEL%%Uncharacterized protein ZC412.3 OS=Caenorhabditis elegans GN=ZC412.3 PE=1 SV=1%%1.4e-102	-	Y	-		2	10	4	0	0	0	0	0	0	0	0	0	0	0	0	0	0	0
	GS_07651	-	Y	Y	Y	-		K05448-vascular endothelial growth factor A/B, PGF	IPR000072-Platelet-derived growth factor (PDGF)	Cellular Component: membrane (GO:0016020), Molecular Function: growth factor activity (GO:0008083)	cel:Y39A3CL.6 pvf-1; PDGF/VEGF growth factor related family member (pvf-1)%179%36.8715083798883%2e-21	-	-	-		2	3	3	0	0	0	0	0	0	0	0	0	0	0	0	0	0	0
	GS_05709	-	Y	Y	Y	-		-	IPR002223-Proteinase inhibitor I2, Kunitz metazoa IPR000884-Thrombospondin, type 1 repeat IPR009465-Spondin, N-terminal IPR002861-Reeler domain IPR020901-Proteinase inhibitor I2, Kunitz, conserved site	Molecular Function: serine-type endopeptidase inhibitor activity (GO:0004867)	GPCR%Class B%Q3UHD1%Class B Orphans%Class B Orphans%BAI1%"brain-specific angiogenesis inhibitor 1, FLJ41988"%107831%207%29.4685990338164%3e-15	Y	-	-		1	3	8	0	0	0	0	0	0	0	0	0	0	0	0	0	0	0
	GS_19366	-	Y	Y	Y	-		-	-	-	Hypothetical protein	-	-	Y		1	1	7	0	0	0	0	0	0	0	0	0	0	0	0	0	0	0
	GS_23109	-	Y	Y	Y	-		K01738-cysteine synthase A	IPR001216-Cysteine synthase/cystathionine beta-synthase P-phosphate-binding site IPR005859-Cysteine synthase A IPR005856-Cysteine synthase K/M IPR001926-Pyridoxal phosphate-dependent enzyme, beta subunit	Biological Process: cysteine biosynthetic process from serine (GO:0006535), Biological Process: metabolic process (GO:0008152), Molecular Function: catalytic activity (GO:0003824), Molecular Function: cysteine synthase activity (GO:0004124), Molecular Function: pyridoxal phosphate binding (GO:0030170)	sp|Q1H0M1|TRPB_METFK%%Tryptophan synthase beta chain OS=Methylobacillus flagellatus (strain KT / ATCC 51484 / DSM 6875) GN=trpB PE=3 SV=1%%2e-120	-	-	-		1	2	1	0	0	0	0	0	0	0	0	0	0	0	0	0	0	0
	GS_08981	-	Y	Y	Y	-		-	-	-	Y75B7AR.1%CE27416 WBGene00022287 status:Confirmed UniProt:Q9N2X6_CAEEL protein_id:AAF60880.2%HMM_hit%8.6e-32	-	Y	-		6	2	2	0	0	0	0	0	0	0	0	0	0	0	0	0	0	0
	GS_19115	-	Y	Y	Y	-		K13963-serpin B	IPR023795-Protease inhibitor I4, serpin, conserved site IPR000215-Protease inhibitor I4, serpin IPR023796-Serpin domain	Molecular Function: serine-type endopeptidase inhibitor activity (GO:0004867)	bmy:Bm1_25955 serpin; K13963 serpin B%367%40.5994550408719%5e-71	-	-	Y		18	4	21	0	0	0	0	0	0	0	0	0	0	0	0	0	0	0
	GS_06453	-	Y	Y	Y	-		-	IPR003677-Domain of unknown function DUF148	-	bmy:Bm1_42870 Brugia malayi antigen%146%50.6849315068493%8e-34	-	-	-		5	3	12	0	0	0	0	0	0	0	0	0	0	0	0	0	0	0
	GS_19373	-	Y	Y	Y	-		-	IPR015819-Lipid transport protein, beta-sheet shell IPR015255-Vitellinogen, open beta-sheet IPR011030-Vitellinogen, superhelical IPR015818-Vitellinogen, open beta-sheet, subdomain 2 IPR001747-Lipid transport protein, N-terminal IPR001846-von Willebrand factor, type D domain IPR015816-Vitellinogen, beta-sheet N-terminal	Biological Process: lipid transport (GO:0006869), Molecular Function: lipid transporter activity (GO:0005319)	cbr:CBG14203 Cbr-vit-4; C. briggsae CBR-VIT-4 protein%1743%31.4400458978772%0.0	-	Y	-		61	55	103	0	0	0	0	0	0	0	0	0	0	0	0	0	0	0
	GS_14400	-	Y	Y	Y	-		-	-	-	Hypothetical protein	-	Y	-		3	1	10	0	0	0	0	0	0	0	0	0	0	0	0	0	0	0
	GS_04373	-	Y	Y	Y	-		K00573-protein-L-isoaspartate(D-aspartate) O-methyltransferase	IPR000682-Protein-L-isoaspartate(D-aspartate) O-methyltransferase	Biological Process: protein modification process (GO:0006464), Molecular Function: protein-L-isoaspartate (D-aspartate) O-methyltransferase activity (GO:0004719)	bmy:Bm1_52680 L-isoaspartate; K00573 protein-L-isoaspartate(D-aspartate) O-methyltransferase [EC:2.1.1.77]%223%73.542600896861%5e-93	-	-	-		4	4	12	0	0	0	0	0	0	0	0	0	0	0	0	0	0	0
	GS_05731	-	Y	Y	Y	-		-	-	-	Hypothetical protein	-	-	Y		2	1	3	0	0	0	0	0	0	0	0	0	0	0	0	0	0	0
	GS_23601	-	Y	Y	Y	-		K13963-serpin B	IPR023795-Protease inhibitor I4, serpin, conserved site IPR000215-Protease inhibitor I4, serpin IPR023796-Serpin domain	Molecular Function: serine-type endopeptidase inhibitor activity (GO:0004867)	bmy:Bm1_18355 serpin; K13963 serpin B%365%37.8082191780822%5e-66	Y	-	Y		4	2	8	0	0	0	0	0	0	0	0	0	0	0	0	0	0	0
	GS_00548	-	Y	Y	Y	-		-	IPR001534-Transthyretin-like	Cellular Component: extracellular space (GO:0005615)	sp|Q03575|TTR5_CAEEL%%Transthyretin-like protein 5 OS=Caenorhabditis elegans GN=ttr-5 PE=2 SV=1%%2.3e-65	-	Y	-		8	5	2	0	0	0	0	0	0	0	0	0	0	0	0	0	0	0
	GS_22518	-	Y	Y	Y	-		-	IPR010480-Proteinase inhibitor I33, aspin	-	bmy:Bm1_42885 Filarial antigen Av33 precursor%233%56.6523605150215%8e-66	-	Y	-		6	3	4	0	0	0	0	0	0	0	0	0	0	0	0	0	0	0
	GS_05876	-	Y	Y	Y	-		-	IPR002919-Protease inhibitor I8, cysteine-rich trypsin inhibitor-like	-	Peptidase Inhibitor%MER017818 - chymotrypsin/elastase inhibitor {{Ascaris}-type} (Ascaris suum) [I08.001]#I08#%63%95.2380952380952%2e-28	-	Y	-		3	1	43	0	0	0	0	0	0	0	0	0	0	0	0	0	0	0
	GS_02989	-	Y	Y	Y	-		-	IPR002223-Proteinase inhibitor I2, Kunitz metazoa IPR000884-Thrombospondin, type 1 repeat IPR010294-ADAM-TS Spacer 1 IPR013273-Peptidase M12B, ADAM-TS IPR020901-Proteinase inhibitor I2, Kunitz, conserved site	Cellular Component: extracellular matrix (GO:0031012), Cellular Component: proteinaceous extracellular matrix (GO:0005578), Molecular Function: metalloendopeptidase activity (GO:0004222), Molecular Function: metallopeptidase activity (GO:0008237), Molecular Function: serine-type endopeptidase inhibitor activity (GO:0004867), Molecular Function: zinc ion binding (GO:0008270)	Peptidase%MER103526 - ADAMTS20 peptidase {mouse-type} (Cavia porcellus) [M12.188]#M12B#%451%24.1685144124169%5e-25	-	Y	-		1	2	6	0	0	0	0	0	0	0	0	0	0	0	0	0	0	0
	GS_23459	-	Y	Y	-	Y		-	-	-	sp|P15144|AMPN_HUMAN%%Aminopeptidase N OS=Homo sapiens GN=ANPEP PE=1 SV=4%%2e-124	-	-	Y		3	1	0	13	0	0	0	0	0	0	0	0	0	0	0	0	0	0
	GS_02555	-	Y	Y	-	Y		-	IPR001930-Peptidase M1, alanine aminopeptidase/leukotriene A4 hydrolase	Biological Process: proteolysis (GO:0006508)	sp|P15144|AMPN_HUMAN%%Aminopeptidase N OS=Homo sapiens GN=ANPEP PE=1 SV=4%%3.9e-147	-	-	Y		2	8	0	27	0	0	0	0	0	0	0	0	0	0	0	0	0	0
	GS_21518	-	Y	Y	-	Y		-	IPR014782-Peptidase M1, membrane alanine aminopeptidase, N-terminal IPR001930-Peptidase M1, alanine aminopeptidase/leukotriene A4 hydrolase	Biological Process: proteolysis (GO:0006508), Molecular Function: metallopeptidase activity (GO:0008237), Molecular Function: zinc ion binding (GO:0008270)	Peptidase%MER125837 - family M1 unassigned peptidases (Caenorhabditis briggsae) [M01.UPW]#M01#%132%58.3333333333333%1e-43	-	-	Y		2	2	0	9	0	0	0	0	0	0	0	0	0	0	0	0	0	0
	GS_13515	-	Y	Y	-	Y		-	IPR014782-Peptidase M1, membrane alanine aminopeptidase, N-terminal IPR001930-Peptidase M1, alanine aminopeptidase/leukotriene A4 hydrolase	Biological Process: proteolysis (GO:0006508), Molecular Function: metallopeptidase activity (GO:0008237), Molecular Function: zinc ion binding (GO:0008270)	Peptidase%MER171631 - family M1 unassigned peptidases (Caenorhabditis elegans) [M01.UPW]#M01#%210%45.2380952380952%8e-42	-	-	Y		1	9	0	32	0	0	0	0	0	0	0	0	0	0	0	0	0	0
	GS_19140	-	Y	Y	-	Y		-	IPR008753-Peptidase M13 IPR018497-Peptidase M13, neprilysin, C-terminal IPR000718-Peptidase M13, neprilysin	Biological Process: proteolysis (GO:0006508), Molecular Function: metalloendopeptidase activity (GO:0004222), Molecular Function: metallopeptidase activity (GO:0008237)	Peptidase%MER001365 - family M13 unassigned peptidases (Caenorhabditis elegans) [M13.UPW]#M13#%733%45.8390177353342%1e-178	-	-	Y		5	43	0	41	0	0	0	0	0	0	0	0	0	0	0	0	0	0
	GS_10348	-	Y	Y	-	Y		-	IPR008753-Peptidase M13 IPR018497-Peptidase M13, neprilysin, C-terminal IPR000718-Peptidase M13, neprilysin	Biological Process: proteolysis (GO:0006508), Molecular Function: metalloendopeptidase activity (GO:0004222), Molecular Function: metallopeptidase activity (GO:0008237)	Peptidase%MER001365 - family M13 unassigned peptidases (Caenorhabditis elegans) [M13.UPW]#M13#%729%44.1700960219479%1e-171	-	-	Y		3	12	0	55	0	0	0	0	0	0	0	0	0	0	0	0	0	0
	GS_02701	-	Y	Y	-	Y		-	IPR008753-Peptidase M13 IPR018497-Peptidase M13, neprilysin, C-terminal IPR000718-Peptidase M13, neprilysin	Biological Process: proteolysis (GO:0006508), Molecular Function: metalloendopeptidase activity (GO:0004222), Molecular Function: metallopeptidase activity (GO:0008237)	Peptidase%MER015175 - MEP peptidase {nematode} (Ancylostoma caninum) [M13.011]#M13#%744%43.4139784946237%1e-164	Y	-	-		1	1	0	9	0	0	0	0	0	0	0	0	0	0	0	0	0	0
	GS_16898	-	Y	Y	-	Y		K08660-cytosolic nonspecific dipeptidase	IPR011650-Peptidase M20, dimerisation IPR001261-ArgE/DapE/ACY1/CPG2/YscS, conserved site IPR002933-Peptidase M20	Biological Process: metabolic process (GO:0008152), Biological Process: proteolysis (GO:0006508), Molecular Function: hydrolase activity (GO:0016787), Molecular Function: metallopeptidase activity (GO:0008237)	Peptidase%MER078517 - carnosine dipeptidase II (Tribolium castaneum) [M20.005]#M20A#%462%56.0606060606061%1e-156	-	-	-		2	6	0	9	0	0	0	0	0	0	0	0	0	0	0	0	0	0
	GS_11178	-	Y	Y	-	Y		K01285-lysosomal Pro-X carboxypeptidase	IPR008758-Peptidase S28	Biological Process: proteolysis (GO:0006508), Molecular Function: serine-type peptidase activity (GO:0008236)	Peptidase%MER120238 - family S28 unassigned peptidases (Brugia malayi) [S28.UPW]#S28#%476%47.6890756302521%1e-126	-	Y	-		1	1	0	9	0	0	0	0	0	0	0	0	0	0	0	0	0	0
	GS_17824	-	Y	Y	-	Y		-	IPR002035-von Willebrand factor, type A IPR001304-C-type lectin IPR016187-C-type lectin fold IPR016186-C-type lectin-like	Molecular Function: binding (GO:0005488), Molecular Function: protein binding (GO:0005515)	cel:F35C5.9 clec-66; C-type LECtin family member (clec-66)%385%27.5324675324675%6e-19	-	-	Y		11	27	0	12	0	0	0	0	0	0	0	0	0	0	0	0	0	0
	GS_16378	-	Y	Y	-	Y		-	IPR002035-von Willebrand factor, type A	Molecular Function: protein binding (GO:0005515)	ssc:100525216 vitrin-like%151%34.4370860927152%3e-13	-	Y	-		9	5	0	2	0	0	0	0	0	0	0	0	0	0	0	0	0	0
	GS_01093	-	Y	Y	-	Y		K05768-gelsolin	IPR007123-Gelsolin domain IPR007122-Gelsolin	Molecular Function: actin binding (GO:0003779)	sp|Q68FP1|GELS_RAT%%Gelsolin OS=Rattus norvegicus GN=Gsn PE=1 SV=1%%8.7e-236	-	-	Y		8	13	0	11	0	0	0	0	0	0	0	0	0	0	0	0	0	0
	GS_02845	-	Y	Y	-	Y		-	IPR002035-von Willebrand factor, type A IPR016187-C-type lectin fold IPR016186-C-type lectin-like	Molecular Function: binding (GO:0005488), Molecular Function: protein binding (GO:0005515)	sp|A6H584|CO6A5_MOUSE%%Collagen alpha-5(VI) chain OS=Mus musculus GN=Col29a1 PE=1 SV=2%%0	-	Y	-		7	12	0	4	0	0	0	0	0	0	0	0	0	0	0	0	0	0
	GS_01761	-	Y	Y	-	Y		-	IPR002919-Protease inhibitor I8, cysteine-rich trypsin inhibitor-like IPR006210-Epidermal growth factor-like IPR013032-EGF-like region, conserved site IPR014853-Conserved-cysteine-rich domain IPR001846-von Willebrand factor, type D domain IPR000742-Epidermal growth factor-like, type 3	Molecular Function: protein binding (GO:0005515)	sp|A2VEC9|SSPO_HUMAN%%SCO-spondin OS=Homo sapiens GN=SSPO PE=2 SV=1%%0	-	-	Y		3	16	0	2	0	0	0	0	0	0	0	0	0	0	0	0	0	0
	GS_03797	-	Y	Y	-	Y		K03283-heat shock 70kDa protein 1/8	IPR013126-Heat shock protein 70 IPR001023-Heat shock protein Hsp70 IPR018181-Heat shock protein 70, conserved site	Molecular Function: ATP binding (GO:0005524)	Channels and Transporters%gnl|TC-DB|P08107%1%Channel/pores%1.A.%alpha-type channels%1.A.3% Voltage-gated Ion Channel (VIC) Superfamily .%1.A.33.1.3%" Cation Channel-forming Heat Shock Protein-70 (Hsp70) Family.; Ryanodine-Inositol 1,4,5-triphosphate Receptor Ca2+ Channel (RIR-CaC) Family."%Heat shock 70 kDa protein 1 (HSP70.1) (HSP70-1/HSP70-2) - Homo sapiens (Human).%614%77.36156352%0	-	-	-		3	6	0	58	0	0	0	0	0	0	0	0	0	0	0	0	0	0
	GS_13054	-	Y	Y	-	Y		-	IPR000322-Glycoside hydrolase, family 31 IPR017853-Glycoside hydrolase, superfamily	Biological Process: carbohydrate metabolic process (GO:0005975), Molecular Function: hydrolase activity, hydrolyzing O-glycosyl compounds (GO:0004553)	sp|O43451|MGA_HUMAN%%Maltase-glucoamylase, intestinal OS=Homo sapiens GN=MGAM PE=1 SV=5%%0	-	-	Y		3	5	0	44	0	0	0	0	0	0	0	0	0	0	0	0	0	0
	GS_02934	-	Y	Y	-	Y		K00025-malate dehydrogenase	IPR022383-Lactate/malate dehydrogenase, C-terminal IPR015955-Lactate dehydrogenase/glycoside hydrolase, family 4, C-terminal IPR016040-NAD(P)-binding domain IPR001236-Lactate/malate dehydrogenase, N-terminal IPR001252-Malate dehydrogenase, active site IPR010945-Malate dehydrogenase, type 2 IPR011274-Malate dehydrogenase, NAD-dependent, cytosolic	Biological Process: carbohydrate metabolic process (GO:0005975), Biological Process: malate metabolic process (GO:0006108), Biological Process: oxidation-reduction process (GO:0055114), Molecular Function: binding (GO:0005488), Molecular Function: catalytic activity (GO:0003824), Molecular Function: L-malate dehydrogenase activity (GO:0030060), Molecular Function: malate dehydrogenase activity (G…	sp|Q632G8|LDH2_BACCZ%%L-lactate dehydrogenase 2 OS=Bacillus cereus (strain ZK / E33L) GN=ldh2 PE=3 SV=1%%2.2e-115	-	-	Y		2	5	0	2	0	0	0	0	0	0	0	0	0	0	0	0	0	0
	GS_22308	-	Y	Y	-	Y		K07253-phenylpyruvate tautomerase	IPR014347-Tautomerase IPR001398-Macrophage migration inhibitory factor IPR019829-Macrophage migration inhibitory factor, conserved site	-	bmy:Bm1_28435 Bm-MIF-1, identical; K07253 phenylpyruvate tautomerase [EC:5.3.2.1]%115%62.6086956521739%4e-36	-	-	-		2	4	0	2	0	0	0	0	0	0	0	0	0	0	0	0	0	0
	GS_02893	-	Y	Y	-	Y		-	IPR000560-Histidine phosphatase superfamily, clade-2	Molecular Function: acid phosphatase activity (GO:0003993)	bmy:Bm1_24820 Histidine acid phosphatase family protein%295%43.0508474576271%3e-64	-	Y	-		1	1	0	10	0	0	0	0	0	0	0	0	0	0	0	0	0	0
	GS_07553	-	Y	Y	-	Y		-	IPR000322-Glycoside hydrolase, family 31 IPR011013-Glycoside hydrolase-type carbohydrate-binding IPR017853-Glycoside hydrolase, superfamily	Biological Process: carbohydrate metabolic process (GO:0005975), Molecular Function: carbohydrate binding (GO:0030246), Molecular Function: catalytic activity (GO:0003824), Molecular Function: hydrolase activity, hydrolyzing O-glycosyl compounds (GO:0004553)	sp|P07768|SUIS_RABIT%%Sucrase-isomaltase, intestinal OS=Oryctolagus cuniculus GN=SI PE=1 SV=3%%1.1e-91	-	Y	-		1	3	0	7	0	0	0	0	0	0	0	0	0	0	0	0	0	0
	GS_14472	-	Y	Y	-	Y		-	IPR018378-C-type lectin, conserved site IPR001304-C-type lectin IPR016187-C-type lectin fold IPR016186-C-type lectin-like	Molecular Function: binding (GO:0005488)	cbr:CBG17839 Cbr-clec-50; C. briggsae CBR-CLEC-50 protein%227%24.2290748898678%6e-09	-	Y	-		1	2	0	2	0	0	0	0	0	0	0	0	0	0	0	0	0	0
	GS_17651	-	Y	Y	-	Y		-	IPR013320-Concanavalin A-like lectin/glucanase, subgroup IPR008985-Concanavalin A-like lectin/glucanase IPR001079-Galectin, carbohydrate recognition domain	Molecular Function: sugar binding (GO:0005529)	cel:Y55B1AR.1 lec-6; gaLECtin family member (lec-6)%137%28.4671532846715%8e-10	-	-	-		1	1	0	7	0	0	0	0	0	0	0	0	0	0	0	0	0	0
	GS_19095	-	Y	Y	-	Y		K02183-calmodulin	IPR002048-Calcium-binding EF-hand IPR018247-EF-Hand 1, calcium-binding site IPR018249-EF-HAND 2 IPR018248-EF-hand IPR011992-EF-hand-like domain	Molecular Function: calcium ion binding (GO:0005509)	Channels and Transporters%gnl|TC-DB|P06704%9%Incompletely characterized transport systems%9.A.%Recognized transporters of unknown biochemical mechanism%9.A.1% Non ABC Multidrug Exporter (N-MDE) Family.%9.A.14.1.1% Non ABC Multidrug Exporter (N-MDE) Family.; Nuclear Pore Complex (NPC) Family.%Cell division control protein 31 - Saccharomyces cerevisiae (Baker's yeast).%147%42.17687075%2.00E-27	-	-	-		1	4	0	1	0	0	0	0	0	0	0	0	0	0	0	0	0	0
	GS_21210	-	Y	Y	-	Y		-	-	-	R05F9.12%CE31976 WBGene00019895 glycosyl hydralase, sucrase-isomaltase status:Confirmed UniProt:Q21750_CAEEL protein_id:AAA83174.3%HMM_hit%7.3e-31	-	-	-		1	2	0	5	0	0	0	0	0	0	0	0	0	0	0	0	0	0
	L3E_02053	-	Y	Y	-	Y		-	IPR018247-EF-Hand 1, calcium-binding site IPR002048-Calcium-binding EF-hand IPR018249-EF-HAND 2 IPR001125-Recoverin IPR018248-EF-hand IPR011992-EF-hand-like domain	Molecular Function: calcium ion binding (GO:0005509)	-	-	-	-		1	1	0	6	0	0	0	0	0	0	0	0	0	0	0	0	0	0
	GS_18848	-	Y	Y	-	Y		K00260-glutamate dehydrogenase	IPR006097-Glutamate/phenylalanine/leucine/valine dehydrogenase, dimerisation domain IPR016040-NAD(P)-binding domain IPR006095-Glutamate/phenylalanine/leucine/valine dehydrogenase IPR006096-Glutamate/phenylalanine/leucine/valine dehydrogenase, C-terminal	Biological Process: cellular amino acid metabolic process (GO:0006520), Biological Process: oxidation-reduction process (GO:0055114), Molecular Function: binding (GO:0005488), Molecular Function: oxidoreductase activity (GO:0016491)	bmy:Bm1_08210 glutamate dehydrogenase, mitochondrial precursor, putative (EC:1.4.1.3); K00261 glutamate dehydrogenase (NAD(P)+) [EC:1.4.1.3]%511%71.8199608610568%0.0	-	-	Y		7	19	0	33	0	0	0	0	0	0	0	0	0	0	0	0	0	0
	GS_20676	-	Y	Y	-	Y		-	IPR001464-Annexin IPR018252-Annexin repeat, conserved site IPR018502-Annexin repeat	Molecular Function: calcium ion binding (GO:0005509), Molecular Function: calcium-dependent phospholipid binding (GO:0005544)	Channels and Transporters%gnl|TC-DB|P22465%1%Channel/pores%1.A.%alpha-type channels%1.A.3% Voltage-gated Ion Channel (VIC) Superfamily .%1.A.31.1.1%" Annexin (Annexin) Family.; Ryanodine-Inositol 1,4,5-triphosphate Receptor Ca2+ Channel (RIR-CaC) Family."%ANNEXIN X - Drosophila melanogaster (Fruit fly).%310%40%4.00E-64	-	-	-		2	11	0	19	0	0	0	0	0	0	0	0	0	0	0	0	0	0
	GS_17938	-	Y	Y	-	Y		-	-	-	R102.1%CE42598 WBGene00011288 status:Partially_confirmed UniProt:Q21887_CAEEL protein_id:CAA94355.2%HMM_hit%1.4e-48	-	-	-		2	11	0	8	0	0	0	0	0	0	0	0	0	0	0	0	0	0
	GS_05097	-	Y	Y	-	Y		-	-	-	R102.1%CE42598 WBGene00011288 status:Partially_confirmed UniProt:Q21887_CAEEL protein_id:CAA94355.2%HMM_hit%2.3e-62	-	-	-		1	15	0	69	0	0	0	0	0	0	0	0	0	0	0	0	0	0
	GS_10488	-	Y	Y	-	Y		-	IPR000215-Protease inhibitor I4, serpin IPR023796-Serpin domain	Molecular Function: serine-type endopeptidase inhibitor activity (GO:0004867)	bmy:Bm1_25955 serpin; K13963 serpin B%277%36.101083032491%2e-51	-	-	-		1	10	0	2	0	0	0	0	0	0	0	0	0	0	0	0	0	0
	GS_13712	-	Y	Y	-	Y		-	-	-	R102.1%CE42598 WBGene00011288 status:Partially_confirmed UniProt:Q21887_CAEEL protein_id:CAA94355.2%HMM_hit%2.5e-47	-	-	-		2	9	0	5	0	0	0	0	0	0	0	0	0	0	0	0	0	0
	GS_23521	-	Y	Y	-	Y		K03386-peroxiredoxin (alkyl hydroperoxide reductase subunit C)	IPR017936-Thioredoxin-like IPR012335-Thioredoxin fold IPR019479-Peroxiredoxin, C-terminal IPR000866-Alkyl hydroperoxide reductase subunit C/ Thiol specific antioxidant IPR012336-Thioredoxin-like fold	Biological Process: cell redox homeostasis (GO:0045454), Molecular Function: antioxidant activity (GO:0016209), Molecular Function: oxidoreductase activity (GO:0016491), Molecular Function: peroxiredoxin activity (GO:0051920)	cel:F09E5.15 prdx-2; PeRoxireDoXin family member (prdx-2)%195%80%2e-89	-	-	-		2	7	0	13	0	0	0	0	0	0	0	0	0	0	0	0	0	0
	GS_07496	-	Y	Y	-	Y		-	IPR001464-Annexin IPR018252-Annexin repeat, conserved site IPR018502-Annexin repeat	Molecular Function: calcium ion binding (GO:0005509), Molecular Function: calcium-dependent phospholipid binding (GO:0005544)	Channels and Transporters%gnl|TC-DB|P08133%1%Channel/pores%1.A.%alpha-type channels%1.A.3% Voltage-gated Ion Channel (VIC) Superfamily .%1.A.31.1.2%" Annexin (Annexin) Family.; Ryanodine-Inositol 1,4,5-triphosphate Receptor Ca2+ Channel (RIR-CaC) Family."%Annexin A6 (Annexin VI) (Lipocortin VI) (P68) (P70) (Protein III) (Chromobindin 20) (67 kDa calelectrin) (Calphobindin-II) (CPB-II) - Homo sapi…	-	-	Y		1	4	0	20	0	0	0	0	0	0	0	0	0	0	0	0	0	0
	GS_03428	-	Y	Y	-	-		K02790,K02791-	IPR001461-Peptidase A1 IPR009007-Peptidase aspartic, catalytic IPR021109-Peptidase aspartic IPR001969-Peptidase aspartic, active site	Biological Process: proteolysis (GO:0006508), Molecular Function: aspartic-type endopeptidase activity (GO:0004190)	Peptidase%MER101127 - necepsin-1 (Caenorhabditis briggsae) [A01.053]#A01A#%364%42.032967032967%2e-70	-	Y	-		2	6	0	0	0	0	0	0	0	0	0	0	0	0	0	0	0	0
	GS_12996	-	Y	Y	-	-		-	IPR002035-von Willebrand factor, type A IPR001304-C-type lectin IPR016187-C-type lectin fold IPR016186-C-type lectin-like	Molecular Function: binding (GO:0005488), Molecular Function: protein binding (GO:0005515)	sp|A6H584|CO6A5_MOUSE%%Collagen alpha-5(VI) chain OS=Mus musculus GN=Col29a1 PE=1 SV=2%%0	-	-	Y		3	7	0	0	0	0	0	0	0	0	0	0	0	0	0	0	0	0
	GS_03147	-	Y	Y	-	-		K01939-adenylosuccinate synthase	IPR018220-Adenylosuccinate synthase, active site IPR001114-Adenylosuccinate synthetase	Biological Process: purine nucleotide biosynthetic process (GO:0006164), Cellular Component: cytoplasm (GO:0005737), Molecular Function: adenylosuccinate synthase activity (GO:0004019), Molecular Function: GTP binding (GO:0005525), Molecular Function: magnesium ion binding (GO:0000287)	sp|A5F534|PURA_VIBC3%%Adenylosuccinate synthetase OS=Vibrio cholerae serotype O1 (strain ATCC 39541 / Ogawa 395 / O395) GN=purA PE=3 SV=1%%4.6e-197	-	-	-		1	5	0	0	0	0	0	0	0	0	0	0	0	0	0	0	0	0
	GS_03651	-	Y	Y	-	-		-	IPR001369-Purine phosphorylase, family 2 IPR000845-Nucleoside phosphorylase domain	Biological Process: nucleoside metabolic process (GO:0009116), Molecular Function: catalytic activity (GO:0003824), Molecular Function: transferase activity, transferring pentosyl groups (GO:0016763)	bmy:Bm1_37405 purine nucleoside phosphorylase I, inosine and guanosine-specific family protein; K03783 purine-nucleoside phosphorylase [EC:2.4.2.1]%222%53.6036036036036%2e-63	-	-	-		1	1	0	0	0	0	0	0	0	0	0	0	0	0	0	0	0	0
	GS_11656	-	Y	Y	-	-		-	IPR014715-Fibrinogen, alpha/beta/gamma chain, C-terminal globular, subdomain 2 IPR013032-EGF-like region, conserved site IPR014716-Fibrinogen, alpha/beta/gamma chain, C-terminal globular, subdomain 1 IPR000152-EGF-type aspartate/asparagine hydroxylation site IPR013091-EGF calcium-binding IPR001881-EGF-like calcium-binding IPR000742-Epidermal growth factor-like, type 3 IPR002181-Fibrinogen, alpha/…	Biological Process: signal transduction (GO:0007165), Molecular Function: calcium ion binding (GO:0005509), Molecular Function: protein binding (GO:0005515), Molecular Function: receptor binding (GO:0005102)	GPCR%Class B%Q9NYQ7%Class B Orphans%Class B Orphans%CELSR3%"cadherin, EGF LAG seven-pass G-type receptor 3 (flamingo homolog, Drosophila), CDHF11, EGFL1, FMI1, HFMI1, MEGF2, RESDA1"%107934%92%31.5217391304348%3e-07	-	-	-		1	2	0	0	0	0	0	0	0	0	0	0	0	0	0	0	0	0
	GS_11978	-	Y	Y	-	-		-	IPR003677-Domain of unknown function DUF148	-	sp|P36991|OV17_ONCVO%%OV-17 antigen OS=Onchocerca volvulus GN=OV17 PE=2 SV=1%%1.3e-70	-	Y	-		5	1	0	0	0	0	0	0	0	0	0	0	0	0	0	0	0	0
	GS_04559	-	Y	Y	-	-		-	IPR002035-von Willebrand factor, type A IPR001304-C-type lectin IPR016187-C-type lectin fold IPR016186-C-type lectin-like	Molecular Function: binding (GO:0005488), Molecular Function: protein binding (GO:0005515)	cel:F35C5.5 clec-62; C-type LECtin family member (clec-62)%350%32.8571428571429%2e-46	-	-	-		11	13	0	0	0	0	0	0	0	0	0	0	0	0	0	0	0	0
	GS_14331	-	Y	Y	-	-		-	-	-	ZK856.7%CE06664 WBGene00014108 status:Confirmed UniProt:Q23642_CAEEL protein_id:CAA94855.1%HMM_hit%1.7e-49	-	Y	-		1	7	0	0	0	0	0	0	0	0	0	0	0	0	0	0	0	0
	GS_14063	-	Y	Y	-	-		-	IPR001534-Transthyretin-like	Cellular Component: extracellular space (GO:0005615)	cel:F22A3.7 ttr-36; TransThyretin-Related family domain family member (ttr-36)%99%64.6464646464647%4e-32	-	-	Y		1	3	0	0	0	0	0	0	0	0	0	0	0	0	0	0	0	0
	GS_12387	-	Y	-	Y	Y		-	IPR001534-Transthyretin-like	Cellular Component: extracellular space (GO:0005615)	sp|P34500|TTR2_CAEEL%%Transthyretin-like protein 2 OS=Caenorhabditis elegans GN=ttr-2 PE=1 SV=1%%2.4e-38	-	Y	-		1	0	3	2	0	0	0	0	0	0	0	0	0	0	0	0	0	0
	GS_12508	-	Y	-	Y	Y		-	IPR008632-Nematode fatty acid retinoid binding	Molecular Function: lipid binding (GO:0008289)	bmy:Bm1_45045 fatty acid retinoid binding protein precursor%191%70.6806282722513%7e-74	-	Y	-		1	0	9	2	0	0	0	0	0	0	0	0	0	0	0	0	0	0
	GS_12122	-	Y	-	Y	Y		-	IPR002035-von Willebrand factor, type A IPR013783-Immunoglobulin-like fold IPR006210-Epidermal growth factor-like IPR003961-Fibronectin, type III IPR011042-Six-bladed beta-propeller, TolB-like IPR003598-Immunoglobulin subtype 2 IPR013098-Immunoglobulin I-set IPR007110-Immunoglobulin-like IPR003599-Immunoglobulin subtype IPR008957-Fibronectin type III domain IPR011041-Soluble quinoprotein glucose/…	Molecular Function: catalytic activity (GO:0003824), Molecular Function: protein binding (GO:0005515)	bmy:Bm1_45475 Immunoglobulin I-set domain containing protein%4221%57.1428571428571%0.0	-	-	-		1	0	6	1	0	0	0	0	0	0	0	0	0	0	0	0	0	0
	GS_12437	-	Y	-	Y	Y		-	IPR001534-Transthyretin-like	Cellular Component: extracellular space (GO:0005615)	cel:H14N18.3 ttr-47; TransThyretin-Related family domain family member (ttr-47)%147%43.5374149659864%1e-30	-	Y	-		1	0	6	1	0	0	0	0	0	0	0	0	0	0	0	0	0	0
	GS_20999	-	Y	-	Y	-		-	IPR000010-Proteinase inhibitor I25, cystatin	Molecular Function: cysteine-type endopeptidase inhibitor activity (GO:0004869)	Peptidase Inhibitor%MER036534 - CPI-2a cystatin-like inhibitor {{Caenorhabditis elegans}} (Nippostrongylus brasiliensis) [I25.032]#I25B#%73%45.2054794520548%4e-11	-	Y	-		3	0	6	0	0	0	0	0	0	0	0	0	0	0	0	0	0	0
	GS_06859	-	Y	-	Y	-		-	-	-	F48E3.4%CE35547 WBGene00018605 status:Confirmed UniProt:Q9GPA1_CAEEL protein_id:AAF99955.3%HMM_hit%2.9e-92	-	Y	-		2	0	3	0	0	0	0	0	0	0	0	0	0	0	0	0	0	0
	GS_09339	-	Y	-	Y	-		-	IPR015919-Cadherin-like IPR002126-Cadherin IPR013320-Concanavalin A-like lectin/glucanase, subgroup IPR020894-Cadherin conserved site IPR008985-Concanavalin A-like lectin/glucanase	Biological Process: cell adhesion (GO:0007155), Biological Process: homophilic cell adhesion (GO:0007156), Cellular Component: membrane (GO:0016020), Cellular Component: plasma membrane (GO:0005886), Molecular Function: calcium ion binding (GO:0005509)	GPCR%Class B%O35161%Class B Orphans%Class B Orphans%CELSR1%"cadherin, EGF LAG seven-pass G-type receptor 1 (flamingo homolog, Drosophila), ME2, HFMI2, FMI2, CDHF9"%12614%137%29.9270072992701%6e-09	Y	-	-		1	0	2	0	0	0	0	0	0	0	0	0	0	0	0	0	0	0
	GS_20031	-	Y	-	Y	-		K05692-actin beta/gamma 1	IPR004001-Actin, conserved site IPR004000-Actin-like	Molecular Function: ATP binding (GO:0005524)	bmy:Bm1_34930 actin 2; K05692 actin beta/gamma 1%378%91.2698412698413%0.0	-	-	Y		1	0	1	0	0	0	0	0	0	0	0	0	0	0	0	0	0	0
	GS_02689	-	Y	-	Y	-		K13963-serpin B	IPR023795-Protease inhibitor I4, serpin, conserved site IPR000215-Protease inhibitor I4, serpin IPR023796-Serpin domain	Molecular Function: serine-type endopeptidase inhibitor activity (GO:0004867)	bmy:Bm1_25955 serpin; K13963 serpin B%368%39.945652173913%8e-72	-	-	Y		1	0	6	0	0	0	0	0	0	0	0	0	0	0	0	0	0	0
	GS_06601	-	Y	-	Y	-		-	IPR001534-Transthyretin-like	Cellular Component: extracellular space (GO:0005615)	sp|P34500|TTR2_CAEEL%%Transthyretin-like protein 2 OS=Caenorhabditis elegans GN=ttr-2 PE=1 SV=1%%3.6e-64	-	Y	-		3	0	4	0	0	0	0	0	0	0	0	0	0	0	0	0	0	0
	GS_23123	-	Y	-	Y	-		-	-	-	Hypothetical protein	-	Y	-		2	0	7	0	0	0	0	0	0	0	0	0	0	0	0	0	0	0
	GS_02066	-	Y	-	Y	-		-	IPR012674-Calycin IPR011038-Calycin-like IPR000463-Cytosolic fatty-acid binding	Biological Process: transport (GO:0006810), Molecular Function: binding (GO:0005488), Molecular Function: lipid binding (GO:0008289), Molecular Function: transporter activity (GO:0005215)	bmy:Bm1_33050 FAB1, identical%167%65.2694610778443%6e-57	-	Y	-		1	0	4	0	0	0	0	0	0	0	0	0	0	0	0	0	0	0
	GS_02102	-	Y	-	Y	-		-	IPR003677-Domain of unknown function DUF148	-	bmy:Bm1_42870 Brugia malayi antigen%146%32.1917808219178%3e-10	-	Y	-		2	0	8	0	0	0	0	0	0	0	0	0	0	0	0	0	0	0
	GS_17287	-	Y	-	Y	-		-	IPR021342-Protein of unknown function DUF2959	-	ZC410.5a%CE15209 WBGene00013882 microfilarial antigen like status:Partially_confirmed UniProt:P91844_CAEEL protein_id:CAA92570.1%HMM_hit%5.8e-84	Y	-	-		5	0	13	0	0	0	0	0	0	0	0	0	0	0	0	0	0	0
	GS_19745	-	Y	-	Y	-		-	IPR023795-Protease inhibitor I4, serpin, conserved site IPR000215-Protease inhibitor I4, serpin IPR023796-Serpin domain	Molecular Function: serine-type endopeptidase inhibitor activity (GO:0004867)	bmy:Bm1_25955 serpin; K13963 serpin B%311%39.2282958199357%2e-59	-	-	Y		2	0	10	0	0	0	0	0	0	0	0	0	0	0	0	0	0	0
	GS_18206	-	Y	-	Y	-		-	IPR001534-Transthyretin-like	Cellular Component: extracellular space (GO:0005615)	bmy:Bm1_39905 Transthyretin-like family protein%148%74.3243243243243%8e-54	-	Y	-		1	0	2	0	0	0	0	0	0	0	0	0	0	0	0	0	0	0
	GS_00518	-	Y	-	-	Y		-	IPR001930-Peptidase M1, alanine aminopeptidase/leukotriene A4 hydrolase	Biological Process: proteolysis (GO:0006508)	Peptidase%MER172434 - family M1 unassigned peptidases (Strongylocentrotus purpuratus) [M01.UPW]#M01#%76%38.1578947368421%2e-10	-	-	-		1	0	0	4	0	0	0	0	0	0	0	0	0	0	0	0	0	0
	GS_06178	-	Y	-	-	Y		-	IPR002035-von Willebrand factor, type A	Molecular Function: protein binding (GO:0005515)	Hypothetical protein	Y	-	Y		2	0	0	2	0	0	0	0	0	0	0	0	0	0	0	0	0	0
	GS_06461	-	Y	-	-	-		K01363-cathepsin B	IPR010987-Glutathione S-transferase, C-terminal-like IPR004046-Glutathione S-transferase, C-terminal IPR012335-Thioredoxin fold IPR004045-Glutathione S-transferase, N-terminal IPR000169-Peptidase, cysteine peptidase active site IPR017933-Glutathione S-transferase/chloride channel, C-terminal IPR013128-Peptidase C1A, papain IPR015643-Peptidase C1A, cathepsin B IPR012336-Thioredoxin-like fold IPR00…	Biological Process: proteolysis (GO:0006508), Molecular Function: cysteine-type endopeptidase activity (GO:0004197), Molecular Function: cysteine-type peptidase activity (GO:0008234), Molecular Function: protein binding (GO:0005515)	Peptidase%MER003491 - cathepsin B-like peptidase {platyhelminth} (Ascaris suum) [C01.062]#C01A#%263%100%1e-159	-	-	Y		1	0	0	0	0	0	0	0	0	0	0	0	0	0	0	0	0	0
	GS_02287	-	Y	-	-	-		K09542-crystallin, alpha B	IPR001436-Alpha crystallin/Heat shock protein IPR002068-Heat shock protein Hsp20 IPR008978-HSP20-like chaperone	Biological Process: response to heat (GO:0009408)	bmy:Bm1_14535 Small heat shock protein OV25-1%151%52.317880794702%8e-43	-	-	-		2	0	0	0	0	0	0	0	0	0	0	0	0	0	0	0	0	0
	GS_22093	-	Y	-	-	-		-	IPR013783-Immunoglobulin-like fold IPR013098-Immunoglobulin I-set IPR007110-Immunoglobulin-like	Molecular Function: protein binding (GO:0005515)	bmy:Bm1_35295 Immunoglobulin I-set domain containing protein%166%83.1325301204819%4e-77	-	-	-		1	0	0	0	0	0	0	0	0	0	0	0	0	0	0	0	0	0
	GS_06488	-	Y	-	-	-		-	IPR008962-PapD-like IPR000535-Major sperm protein	Molecular Function: structural molecule activity (GO:0005198)	bmy:Bm1_13600 major sperm protein 2 cytoskeletal MSP%163%74.8466257668712%1e-62	Y	-	-		2	0	0	0	0	0	0	0	0	0	0	0	0	0	0	0	0	0
	GS_05739	-	Y	-	-	-		-	IPR002035-von Willebrand factor, type A IPR001304-C-type lectin IPR016187-C-type lectin fold IPR016186-C-type lectin-like	Molecular Function: binding (GO:0005488), Molecular Function: protein binding (GO:0005515)	sp|A6H584|CO6A5_MOUSE%%Collagen alpha-5(VI) chain OS=Mus musculus GN=Col29a1 PE=1 SV=2%%0	-	Y	-		2	0	0	0	0	0	0	0	0	0	0	0	0	0	0	0	0	0
	GS_16291	-	-	Y	Y	Y		K03231-elongation factor 1-alpha	IPR009001-Translation elongation factor EF1A/initiation factor IF2gamma, C-terminal IPR009000-Translation elongation/initiation factor/Ribosomal, beta-barrel IPR004160-Translation elongation factor EFTu/EF1A, C-terminal IPR004539-Translation elongation factor EF1A, eukaryotic/archaeal IPR000795-Protein synthesis factor, GTP-binding IPR004161-Translation elongation factor EFTu/EF1A, domain 2	Biological Process: translational elongation (GO:0006414), Cellular Component: cytoplasm (GO:0005737), Molecular Function: GTP binding (GO:0005525), Molecular Function: GTPase activity (GO:0003924), Molecular Function: translation elongation factor activity (GO:0003746)	GTPase%F46B6.6 %270%25.9259259259259%1e-07	-	-	Y		0	7	2	14	0	0	0	0	0	0	0	0	0	0	0	0	0	0
	GS_23993	-	-	Y	Y	Y		K07375-tubulin beta	IPR018316-Tubulin/FtsZ, 2-layer sandwich domain IPR008280-Tubulin/FtsZ, C-terminal IPR003008-Tubulin/FtsZ, GTPase domain IPR002453-Beta tubulin IPR000217-Tubulin IPR013838-Beta tubulin, autoregulation binding site IPR023123-Tubulin, C-terminal IPR017975-Tubulin, conserved site	Biological Process: GTP catabolic process (GO:0006184), Biological Process: microtubule-based movement (GO:0007018), Biological Process: microtubule-based process (GO:0007017), Biological Process: protein polymerization (GO:0051258), Cellular Component: microtubule (GO:0005874), Cellular Component: protein complex (GO:0043234), Molecular Function: GTP binding (GO:0005525), Molecular Function: GTP…	bmy:Bm1_25780 beta-tubulin, identical; K07375 tubulin beta%475%91.3684210526316%0.0	-	-	Y		0	7	1	31	0	0	0	0	0	0	0	0	0	0	0	0	0	0
	GS_18054	-	-	Y	Y	Y		K07374-tubulin alpha	IPR018316-Tubulin/FtsZ, 2-layer sandwich domain IPR002452-Alpha tubulin IPR008280-Tubulin/FtsZ, C-terminal IPR003008-Tubulin/FtsZ, GTPase domain IPR000217-Tubulin IPR023123-Tubulin, C-terminal IPR017975-Tubulin, conserved site	Biological Process: GTP catabolic process (GO:0006184), Biological Process: microtubule-based movement (GO:0007018), Biological Process: microtubule-based process (GO:0007017), Biological Process: protein polymerization (GO:0051258), Cellular Component: microtubule (GO:0005874), Cellular Component: protein complex (GO:0043234), Molecular Function: GTP binding (GO:0005525), Molecular Function: GTP…	bmy:Bm1_38680 tubulin alpha chain - mouse; K07374 tubulin alpha%448%96.6517857142857%0.0	Y	-	Y		0	3	2	20	0	0	0	0	0	0	0	0	0	0	0	0	0	0
	GS_18098	-	-	Y	Y	Y		-	IPR001395-Aldo/keto reductase IPR023210-NADP-dependent oxidoreductase domain IPR020471-Aldo/keto reductase subgroup IPR018170-Aldo/keto reductase, conserved site	Biological Process: oxidation-reduction process (GO:0055114), Molecular Function: oxidoreductase activity (GO:0016491)	bmy:Bm1_28070 oxidoreductase, aldo/keto reductase family protein%337%65.5786350148368%1e-134	-	-	Y		0	3	3	1	0	0	0	0	0	0	0	0	0	0	0	0	0	0
	GS_21096	-	-	Y	Y	Y		K03386-peroxiredoxin (alkyl hydroperoxide reductase subunit C)	IPR017936-Thioredoxin-like IPR012335-Thioredoxin fold IPR019479-Peroxiredoxin, C-terminal IPR000866-Alkyl hydroperoxide reductase subunit C/ Thiol specific antioxidant IPR012336-Thioredoxin-like fold	Biological Process: cell redox homeostasis (GO:0045454), Molecular Function: antioxidant activity (GO:0016209), Molecular Function: oxidoreductase activity (GO:0016491), Molecular Function: peroxiredoxin activity (GO:0051920)	cel:F09E5.15 prdx-2; PeRoxireDoXin family member (prdx-2)%195%79.4871794871795%2e-89	-	-	Y		0	3	5	3	0	0	0	0	0	0	0	0	0	0	0	0	0	0
	GS_00642	-	-	Y	Y	Y		K00850-6-phosphofructokinase	IPR022953-Phosphofructokinase IPR015912-Phosphofructokinase, conserved site IPR000023-Phosphofructokinase domain IPR009161-6-phosphofructokinase, eukaryotic type	Biological Process: glycolysis (GO:0006096), Cellular Component: 6-phosphofructokinase complex (GO:0005945), Cellular Component: cytoplasm (GO:0005737), Molecular Function: 6-phosphofructokinase activity (GO:0003872)	bmy:Bm1_31220 phosphofructokinase; K00850 6-phosphofructokinase [EC:2.7.1.11]%820%77.8048780487805%0.0	-	-	Y		0	2	2	6	0	0	0	0	0	0	0	0	0	0	0	0	0	0
	GS_04583	-	-	Y	Y	Y		-	IPR000806-Rab GDI protein IPR018203-GDP dissociation inhibitor	Biological Process: protein transport (GO:0015031), Molecular Function: Rab GDP-dissociation inhibitor activity (GO:0005093)	bmy:Bm1_08800 Rab GDP dissociation inhibitor alpha%444%90.0900900900901%0.0	-	-	-		0	1	1	2	0	0	0	0	0	0	0	0	0	0	0	0	0	0
	GS_10490	-	-	Y	Y	Y		K00700-1,4-alpha-glucan branching enzyme	IPR006048-Alpha-amylase, C-terminal all beta IPR015902-Alpha amylase IPR013781-Glycoside hydrolase, subgroup, catalytic core IPR013780-Glycosyl hydrolase, family 13, all-beta IPR017853-Glycoside hydrolase, superfamily IPR006047-Glycosyl hydrolase, family 13, catalytic domain IPR006589-Glycosyl hydrolase, family 13, subfamily, catalytic domain	Biological Process: carbohydrate metabolic process (GO:0005975), Molecular Function: catalytic activity (GO:0003824), Molecular Function: cation binding (GO:0043169)	bmy:Bm1_02775 1,4-alpha-glucan branching enzyme (EC:2.4.1.18); K00700 1,4-alpha-glucan branching enzyme [EC:2.4.1.18]%570%74.7368421052632%0.0	-	-	Y		0	1	1	2	0	0	0	0	0	0	0	0	0	0	0	0	0	0
	GS_11347	-	-	Y	Y	Y		K00688-starch phosphorylase	IPR000811-Glycosyl transferase, family 35 IPR011833-Glycogen/starch/alpha-glucan phosphorylase	Biological Process: carbohydrate metabolic process (GO:0005975), Molecular Function: phosphorylase activity (GO:0004645), Molecular Function: pyridoxal phosphate binding (GO:0030170)	bmy:Bm1_16060 carbohydrate phosphorylase; K00688 starch phosphorylase [EC:2.4.1.1]%852%83.9201877934272%0.0	-	-	Y		0	1	2	3	0	0	0	0	0	0	0	0	0	0	0	0	0	0
	GS_07454	-	-	Y	Y	Y		K01802-peptidylprolyl isomerase	IPR020892-Peptidyl-prolyl cis-trans isomerase, cyclophilin-type, conserved site IPR002130-Peptidyl-prolyl cis-trans isomerase, cyclophilin-type IPR015891-Cyclophilin-like	Biological Process: protein folding (GO:0006457), Molecular Function: peptidyl-prolyl cis-trans isomerase activity (GO:0003755)	bmy:Bm1_55850 cyclophilin-type peptidyl-prolyl cis-trans isomerase-2, Bmcyp-2; K01802 peptidylprolyl isomerase [EC:5.2.1.8]%171%91.2280701754386%9e-89	-	-	-		0	9	1	6	0	0	0	0	0	0	0	0	0	0	0	0	0	0
	GS_11891	-	-	Y	Y	Y		-	IPR012674-Calycin IPR011038-Calycin-like IPR000463-Cytosolic fatty-acid binding	Biological Process: transport (GO:0006810), Molecular Function: binding (GO:0005488), Molecular Function: lipid binding (GO:0008289), Molecular Function: transporter activity (GO:0005215)	cel:F40F4.4 lbp-3; Lipid Binding Protein family member (lbp-3)%162%55.5555555555556%2e-48	-	Y	-		0	5	3	5	0	0	0	0	0	0	0	0	0	0	0	0	0	0
	GS_21571	-	-	Y	Y	Y		-	IPR001534-Transthyretin-like	Cellular Component: extracellular space (GO:0005615)	cbr:CBG05998 Cbr-ttr-16; C. briggsae CBR-TTR-16 protein%134%36.5671641791045%2e-21	-	Y	-		0	2	3	2	0	0	0	0	0	0	0	0	0	0	0	0	0	0
	GS_11234	-	-	Y	Y	-		-	IPR001312-Hexokinase IPR022672-Hexokinase, N-terminal IPR022673-Hexokinase, C-terminal	Biological Process: carbohydrate metabolic process (GO:0005975), Molecular Function: ATP binding (GO:0005524), Molecular Function: phosphotransferase activity, alcohol group as acceptor (GO:0016773)	bmy:Bm1_31750 Hexokinase family protein%503%63.0218687872763%1e-175	Y	-	Y		0	2	3	0	0	0	0	0	0	0	0	0	0	0	0	0	0	0
	GS_20429	-	-	Y	Y	-		-	IPR003953-Fumarate reductase/succinate dehydrogenase flavoprotein, N-terminal IPR010960-Flavocytochrome c	Biological Process: oxidation-reduction process (GO:0055114), Molecular Function: electron carrier activity (GO:0009055), Molecular Function: oxidoreductase activity (GO:0016491), Molecular Function: succinate dehydrogenase activity (GO:0000104)	Channels and Transporters%gnl|TC-DB|Q65GF4%5%Transport electron carriers%5.A.%Transmembrane 2-electron transfer carriers%5.A.4%Transmembrane 2-electron transfer carriers%5.A.4.1.1% Prokaryotic Succinate Dehydrogenase (SDH) Family.%SdhA OS=Bacillus licheniformis (strain DSM 13 / ATCC 14580) GN=sdhA PE=4 SV=1%317%25.55205047%3.00E-10	-	-	Y		0	1	4	0	0	0	0	0	0	0	0	0	0	0	0	0	0	0
	GS_22941	-	-	Y	Y	-		-	IPR008914-Phosphatidylethanolamine-binding protein PEBP IPR001858-Phosphatidylethanolamine-binding, conserved site	-	sp|O16264|PEBPH_CAEEL%%Phosphatidylethanolamine-binding protein homolog F40A3.3 OS=Caenorhabditis elegans GN=F40A3.3 PE=2 SV=1%%9.4e-66	-	-	-		0	1	3	0	0	0	0	0	0	0	0	0	0	0	0	0	0	0
	GS_09307	-	-	Y	-	Y		-	IPR014782-Peptidase M1, membrane alanine aminopeptidase, N-terminal IPR001930-Peptidase M1, alanine aminopeptidase/leukotriene A4 hydrolase	Biological Process: proteolysis (GO:0006508), Molecular Function: metallopeptidase activity (GO:0008237), Molecular Function: zinc ion binding (GO:0008270)	Peptidase%MER002422 - family M1 unassigned peptidases (Caenorhabditis elegans) [M01.UPW]#M01#%207%47.8260869565217%2e-53	-	-	Y		0	4	0	25	0	0	0	0	0	0	0	0	0	0	0	0	0	0
	GS_16008	-	-	Y	-	Y		K08660-cytosolic nonspecific dipeptidase	IPR011650-Peptidase M20, dimerisation IPR001261-ArgE/DapE/ACY1/CPG2/YscS, conserved site IPR002933-Peptidase M20	Biological Process: metabolic process (GO:0008152), Biological Process: proteolysis (GO:0006508), Molecular Function: hydrolase activity (GO:0016787), Molecular Function: metallopeptidase activity (GO:0008237)	Peptidase%MER038716 - carnosine dipeptidase II (Xenopus laevis) [M20.005]#M20A#%468%57.0512820512821%1e-160	-	-	Y		0	3	0	22	0	0	0	0	0	0	0	0	0	0	0	0	0	0
	GS_09676	-	-	Y	-	Y		-	IPR018202-Peptidase S10, serine carboxypeptidase, active site IPR001563-Peptidase S10, serine carboxypeptidase	Biological Process: proteolysis (GO:0006508), Molecular Function: serine-type carboxypeptidase activity (GO:0004185)	Peptidase%MER020180 - serine carboxypeptidase A (Caenorhabditis elegans) [S10.002]#S10#%88%44.3181818181818%6e-14	-	-	-		0	1	0	3	0	0	0	0	0	0	0	0	0	0	0	0	0	0
	GS_05767	-	-	Y	-	Y		K01421-putative membrane protein	IPR011072-HR1 rho-binding repeat IPR009053-Prefoldin	Biological Process: signal transduction (GO:0007165), Cellular Component: intracellular (GO:0005622)	tva:TVAG_268110 viral A-type inclusion protein%2041%23.2729054385105%5e-31	-	-	-		0	43	0	46	0	0	0	0	0	0	0	0	0	0	0	0	0	0
	GS_02832	-	-	Y	-	Y		-	IPR001322-Intermediate filament, C-terminal IPR016044-Filament IPR001664-Intermediate filament protein	Molecular Function: structural molecule activity (GO:0005198)	bmy:Bm1_45215 intermediate filament protein%490%56.734693877551%1e-153	-	-	Y		0	28	0	25	0	0	0	0	0	0	0	0	0	0	0	0	0	0
	GS_11309	-	-	Y	-	Y		-	IPR009053-Prefoldin	-	cbr:CBG14578 Cbr-lfi-1; C. briggsae CBR-LFI-1 protein%1250%44.4%0.0	-	-	-		0	28	0	9	0	0	0	0	0	0	0	0	0	0	0	0	0	0
	GS_07513	-	-	Y	-	Y		K06114-spectrin alpha	IPR013315-Spectrin alpha chain, SH3 domain IPR014837-EF-hand, Ca insensitive IPR002017-Spectrin repeat IPR002048-Calcium-binding EF-hand IPR018247-EF-Hand 1, calcium-binding site IPR001452-Src homology-3 domain IPR018249-EF-HAND 2 IPR011992-EF-hand-like domain IPR018159-Spectrin/alpha-actinin	Molecular Function: calcium ion binding (GO:0005509), Molecular Function: protein binding (GO:0005515)	Channels and Transporters%gnl|TC-DB|Q62420%8%Accessory factors involved in transport%8.A.%Auxillary transport proteins%8.A.3% Cytoplasmic Membrane-Periplasmic Auxiliary-1 (MPA1) Protein with Cytoplasmic (C) Domain (MPA1-C or MPA1+C) Family.%8.A.34.1.1% Cytoplasmic Membrane-Periplasmic Auxiliary-1 (MPA1) Protein with Cytoplasmic (C) Domain (MPA1-C or MPA1+C) Family.; Endophilin (Endophilin) Family…	-	-	-		0	25	0	35	0	0	0	0	0	0	0	0	0	0	0	0	0	0
	GS_07399	-	-	Y	-	Y		-	IPR001322-Intermediate filament, C-terminal IPR018039-Intermediate filament protein, conserved site IPR016044-Filament IPR001664-Intermediate filament protein	Molecular Function: structural molecule activity (GO:0005198)	cel:F10C1.2 ifb-1; Intermediate Filament, B family member (ifb-1)%544%87.8676470588235%0.0	-	-	Y		0	18	0	21	0	0	0	0	0	0	0	0	0	0	0	0	0	0
	GS_11451	-	-	Y	-	Y		K00261-glutamate dehydrogenase (NAD(P)+)	IPR006097-Glutamate/phenylalanine/leucine/valine dehydrogenase, dimerisation domain IPR016040-NAD(P)-binding domain IPR006095-Glutamate/phenylalanine/leucine/valine dehydrogenase IPR006096-Glutamate/phenylalanine/leucine/valine dehydrogenase, C-terminal	Biological Process: cellular amino acid metabolic process (GO:0006520), Biological Process: oxidation-reduction process (GO:0055114), Molecular Function: binding (GO:0005488), Molecular Function: oxidoreductase activity (GO:0016491)	bmy:Bm1_08210 glutamate dehydrogenase, mitochondrial precursor, putative (EC:1.4.1.3); K00261 glutamate dehydrogenase (NAD(P)+) [EC:1.4.1.3]%543%79.7421731123389%0.0	-	-	Y		0	16	0	31	0	0	0	0	0	0	0	0	0	0	0	0	0	0
	GS_20599	-	-	Y	-	Y		-	IPR013320-Concanavalin A-like lectin/glucanase, subgroup IPR008985-Concanavalin A-like lectin/glucanase IPR001079-Galectin, carbohydrate recognition domain	Molecular Function: sugar binding (GO:0005529)	Channels and Transporters%gnl|TC-DB|P97840%9%Incompletely characterized transport systems%9.B.%Putative transport proteins%9.B.9% Urate Transporter (UAT) Family.%9.B.9.1.1% Urate Transporter (UAT) Family.%GALECTIN-9 (36 KDA BETA-GALACTOSIDE BINDING LECTIN) (URATE TRANSPORTER/CHANNEL) (UAT) - Rattus norvegicus (Rat).%386%28.75647668%2.00E-33	-	-	Y		0	12	0	32	0	0	0	0	0	0	0	0	0	0	0	0	0	0
	GS_12742	-	-	Y	-	Y		-	IPR012335-Thioredoxin fold IPR010357-Protein of unknown function DUF953, thioredoxin-like IPR012336-Thioredoxin-like fold	-	bmy:Bm1_18950 Chain A, Solution Structure Of Mouse Putative 42-9-9 Protein%108%58.3333333333333%9e-29	-	-	-		0	9	0	1	0	0	0	0	0	0	0	0	0	0	0	0	0	0
	GS_03297	-	-	Y	-	Y		K08056-protein disulfide isomerase family A, member 3	IPR005746-Thioredoxin IPR005788-Disulphide isomerase IPR017936-Thioredoxin-like IPR012335-Thioredoxin fold IPR005792-Protein disulphide isomerase IPR017937-Thioredoxin, conserved site IPR012336-Thioredoxin-like fold IPR013766-Thioredoxin domain	Biological Process: cell redox homeostasis (GO:0045454), Biological Process: glycerol ether metabolic process (GO:0006662), Cellular Component: endoplasmic reticulum (GO:0005783), Molecular Function: electron carrier activity (GO:0009055), Molecular Function: isomerase activity (GO:0016853), Molecular Function: protein disulfide oxidoreductase activity (GO:0015035)	cbr:CBG10789 Cbr-pdi-3; C. briggsae CBR-PDI-3 protein; K08056 protein disulfide isomerase family A, member 3 [EC:5.3.4.1]%481%71.3097713097713%0.0	-	Y	-		0	8	0	16	0	0	0	0	0	0	0	0	0	0	0	0	0	0
	GS_06886	-	-	Y	-	Y		-	-	-	tca:655385 similar to restin%402%23.134328358209%1e-06	-	-	-		0	8	0	6	0	0	0	0	0	0	0	0	0	0	0	0	0	0
	GS_08320	-	-	Y	-	Y		K09580-protein disulfide-isomerase A1	IPR005746-Thioredoxin IPR005788-Disulphide isomerase IPR017936-Thioredoxin-like IPR012335-Thioredoxin fold IPR005792-Protein disulphide isomerase IPR017937-Thioredoxin, conserved site IPR012336-Thioredoxin-like fold IPR013766-Thioredoxin domain	Biological Process: cell redox homeostasis (GO:0045454), Biological Process: glycerol ether metabolic process (GO:0006662), Cellular Component: endoplasmic reticulum (GO:0005783), Molecular Function: electron carrier activity (GO:0009055), Molecular Function: isomerase activity (GO:0016853), Molecular Function: protein disulfide oxidoreductase activity (GO:0015035)	bmy:Bm1_39250 protein disulphide isomerase; K09580 protein disulfide-isomerase A1 [EC:5.3.4.1]%461%75.2711496746204%0.0	-	Y	-		0	8	0	22	0	0	0	0	0	0	0	0	0	0	0	0	0	0
	GS_08605	-	-	Y	-	Y		-	IPR003702-Acetyl-CoA hydrolase/transferase	Biological Process: acetyl-CoA metabolic process (GO:0006084), Molecular Function: catalytic activity (GO:0003824)	sp|Q6CNR2|ACH1_KLULA%%Acetyl-CoA hydrolase OS=Kluyveromyces lactis GN=ACH1 PE=3 SV=1%%8e-181	-	-	Y		0	8	0	8	0	0	0	0	0	0	0	0	0	0	0	0	0	0
	GS_10911	-	-	Y	-	Y		K00600-glycine hydroxymethyltransferase	IPR015421-Pyridoxal phosphate-dependent transferase, major region, subdomain 1 IPR001085-Serine hydroxymethyltransferase IPR019798-Serine hydroxymethyltransferase, pyridoxal phosphate binding site IPR015422-Pyridoxal phosphate-dependent transferase, major region, subdomain 2 IPR015424-Pyridoxal phosphate-dependent transferase, major domain	Biological Process: glycine metabolic process (GO:0006544), Biological Process: L-serine metabolic process (GO:0006563), Molecular Function: catalytic activity (GO:0003824), Molecular Function: glycine hydroxymethyltransferase activity (GO:0004372), Molecular Function: pyridoxal phosphate binding (GO:0030170)	bmy:Bm1_45050 Serine hydroxymethyltransferase; K00600 glycine hydroxymethyltransferase [EC:2.1.2.1]%476%75.6302521008403%0.0	-	-	Y		0	8	0	16	0	0	0	0	0	0	0	0	0	0	0	0	0	0
	GS_14642	-	-	Y	-	Y		K00799-glutathione S-transferase	IPR010987-Glutathione S-transferase, C-terminal-like IPR004046-Glutathione S-transferase, C-terminal IPR012335-Thioredoxin fold IPR004045-Glutathione S-transferase, N-terminal IPR017933-Glutathione S-transferase/chloride channel, C-terminal IPR003082-Glutathione S-transferase, Pi class IPR012336-Thioredoxin-like fold	Biological Process: metabolic process (GO:0008152), Molecular Function: glutathione transferase activity (GO:0004364), Molecular Function: protein binding (GO:0005515)	bmy:Bm1_33930 glutathione transferase; K00799 glutathione S-transferase [EC:2.5.1.18]%209%70.8133971291866%8e-82	-	-	Y		0	8	0	3	0	0	0	0	0	0	0	0	0	0	0	0	0	0
	GS_19283	-	-	Y	-	Y		-	-	-	sp|Q9N4M4|ANC1_CAEEL%%Nuclear anchorage protein 1 OS=Caenorhabditis elegans GN=anc-1 PE=1 SV=3%%0	-	-	-		0	8	0	2	0	0	0	0	0	0	0	0	0	0	0	0	0	0
	GS_00016	-	-	Y	-	Y		-	IPR020830-Glyceraldehyde 3-phosphate dehydrogenase, active site IPR020831-Glyceraldehyde/Erythrose phosphate dehydrogenase family IPR016040-NAD(P)-binding domain IPR020828-Glyceraldehyde 3-phosphate dehydrogenase, NAD(P) binding domain IPR020829-Glyceraldehyde 3-phosphate dehydrogenase, catalytic domain	Biological Process: oxidation-reduction process (GO:0055114), Molecular Function: binding (GO:0005488), Molecular Function: oxidoreductase activity, acting on the aldehyde or oxo group of donors, NAD or NADP as acceptor (GO:0016620)	bmy:Bm1_41940 Glyceraldehyde 3-phosphate dehydrogenase; K00134 glyceraldehyde 3-phosphate dehydrogenase [EC:1.2.1.12]%257%86.3813229571984%1e-129	-	-	Y		0	7	0	1	0	0	0	0	0	0	0	0	0	0	0	0	0	0
	GS_00159	-	-	Y	-	Y		K09487-heat shock protein 90kDa beta	IPR019805-Heat shock protein Hsp90, conserved site IPR015566-Molecular chaperone, heat shock protein, endoplasmin IPR020575-Heat shock protein Hsp90, N-terminal IPR020568-Ribosomal protein S5 domain 2-type fold IPR003594-ATPase-like, ATP-binding domain IPR001404-Heat shock protein Hsp90	Biological Process: protein folding (GO:0006457), Biological Process: response to stress (GO:0006950), Molecular Function: ATP binding (GO:0005524), Molecular Function: unfolded protein binding (GO:0051082)	bmy:Bm1_39715 Endoplasmin precursor; K09487 heat shock protein 90kDa beta%750%77.7333333333333%0.0	-	Y	-		0	7	0	38	0	0	0	0	0	0	0	0	0	0	0	0	0	0
	GS_04063	-	-	Y	-	Y		K09490-heat shock 70kDa protein 5	IPR013126-Heat shock protein 70 IPR001023-Heat shock protein Hsp70 IPR018181-Heat shock protein 70, conserved site	Molecular Function: ATP binding (GO:0005524)	Channels and Transporters%gnl|TC-DB|P08107%1%Channel/pores%1.A.%alpha-type channels%1.A.3% Voltage-gated Ion Channel (VIC) Superfamily .%1.A.33.1.3%" Cation Channel-forming Heat Shock Protein-70 (Hsp70) Family.; Ryanodine-Inositol 1,4,5-triphosphate Receptor Ca2+ Channel (RIR-CaC) Family."%Heat shock 70 kDa protein 1 (HSP70.1) (HSP70-1/HSP70-2) - Homo sapiens (Human).%608%61.34868421%0	-	Y	-		0	7	0	30	0	0	0	0	0	0	0	0	0	0	0	0	0	0
	GS_18191	-	-	Y	-	Y		K00015-glyoxylate reductase	IPR006139-D-isomer specific 2-hydroxyacid dehydrogenase, catalytic domain IPR006140-D-isomer specific 2-hydroxyacid dehydrogenase, NAD-binding IPR016040-NAD(P)-binding domain	Biological Process: metabolic process (GO:0008152), Molecular Function: binding (GO:0005488), Molecular Function: cofactor binding (GO:0048037), Molecular Function: NAD binding (GO:0051287), Molecular Function: oxidoreductase activity, acting on the CH-OH group of donors, NAD or NADP as acceptor (GO:0016616)	sp|Q8U3Y2|GYAR_PYRFU%%Glyoxylate reductase OS=Pyrococcus furiosus GN=gyaR PE=3 SV=1%%3.8e-112	-	-	-		0	7	0	7	0	0	0	0	0	0	0	0	0	0	0	0	0	0
	GS_21568	-	-	Y	-	Y		K13800-UMP-CMP kinase	IPR000850-Adenylate kinase IPR006266-UMP-CMP kinase	Biological Process: nucleobase, nucleoside, nucleotide and nucleic acid metabolic process (GO:0006139), Biological Process: nucleotide phosphorylation (GO:0046939), Molecular Function: ATP binding (GO:0005524), Molecular Function: nucleobase, nucleoside, nucleotide kinase activity (GO:0019205), Molecular Function: nucleotide kinase activity (GO:0019201), Molecular Function: phosphotransferase act…	sp|Q920P5|KAD5_MOUSE%%Adenylate kinase isoenzyme 5 OS=Mus musculus GN=Ak5 PE=2 SV=2%%5.5e-79	-	-	-		0	7	0	3	0	0	0	0	0	0	0	0	0	0	0	0	0	0
	GS_02926	-	-	Y	-	Y		-	IPR000299-FERM domain IPR018979-FERM, N-terminal IPR019749-Band 4.1 domain IPR008954-Moesin IPR011259-Ezrin/radixin/moesin, C-terminal IPR019748-FERM central domain IPR018980-FERM, C-terminal PH-like domain IPR011993-Pleckstrin homology-type IPR014352-FERM/acyl-CoA-binding protein, 3-helical bundle IPR019747-FERM conserved site IPR000798-Ezrin/radixin/moesin family IPR019750-Band 4.1 family	Cellular Component: cytoplasm (GO:0005737), Cellular Component: cytoskeleton (GO:0005856), Cellular Component: extrinsic to membrane (GO:0019898), Molecular Function: binding (GO:0005488), Molecular Function: cytoskeletal protein binding (GO:0008092), Molecular Function: protein binding (GO:0005515)	Channels and Transporters%gnl|TC-DB|P26040%8%Accessory factors involved in transport%8.A.%Auxillary transport proteins%8.A.2% Secretin Auxiliary Lipoprotein (SAL) Family.%8.A.25.1.1% Ezrin/Radixin/Moesin (Ezrin) Family.; Secretin Auxiliary Lipoprotein (SAL) Family.%Ezrin (p81) (Cytovillin) (Villin-2) - Mus musculus (Mouse)%594%52.18855219%1.00E-162	-	-	Y		0	6	0	32	0	0	0	0	0	0	0	0	0	0	0	0	0	0
	GS_03861	-	-	Y	-	Y		K14454-aspartate aminotransferase, cytoplasmic	IPR015421-Pyridoxal phosphate-dependent transferase, major region, subdomain 1 IPR004838-Aminotransferases, class-I, pyridoxal-phosphate-binding site IPR004839-Aminotransferase, class I/classII IPR000796-Aspartate/other aminotransferase IPR015424-Pyridoxal phosphate-dependent transferase, major domain	Biological Process: biosynthetic process (GO:0009058), Biological Process: cellular amino acid metabolic process (GO:0006520), Molecular Function: catalytic activity (GO:0003824), Molecular Function: pyridoxal phosphate binding (GO:0030170), Molecular Function: transaminase activity (GO:0008483), Molecular Function: transferase activity, transferring nitrogenous groups (GO:0016769)	bmy:Bm1_30820 aspartate aminotransferase, identical; K14454 aspartate aminotransferase, cytoplasmic [EC:2.6.1.1]%406%72.4137931034483%0.0	-	-	Y		0	6	0	1	0	0	0	0	0	0	0	0	0	0	0	0	0	0
	GS_04860	-	-	Y	-	Y		K05606-methylmalonyl-CoA/ethylmalonyl-CoA epimerase	IPR017515-Methylmalonyl-CoA epimerase IPR004360-Glyoxalase/bleomycin resistance protein/dioxygenase	-	cbr:CBG11959 Cbr-mce-1; C. briggsae CBR-MCE-1 protein; K05606 methylmalonyl-CoA epimerase [EC:5.1.99.1]%138%78.9855072463768%3e-59	-	-	-		0	6	0	7	0	0	0	0	0	0	0	0	0	0	0	0	0	0
	GS_07058	-	-	Y	-	Y		K00289-formyltetrahydrofolate dehydrogenase	IPR016160-Aldehyde dehydrogenase, conserved site IPR016161-Aldehyde/histidinol dehydrogenase IPR009081-Acyl carrier protein-like IPR011034-Formyl transferase, C-terminal-like IPR006163-Phosphopantetheine-binding IPR016163-Aldehyde dehydrogenase, C-terminal IPR016162-Aldehyde dehydrogenase, N-terminal IPR005793-Formyl transferase, C-terminal IPR002376-Formyl transferase, N-terminal IPR015590-Aldeh…	Biological Process: biosynthetic process (GO:0009058), Biological Process: metabolic process (GO:0008152), Biological Process: oxidation-reduction process (GO:0055114), Molecular Function: acyl carrier activity (GO:0000036), Molecular Function: catalytic activity (GO:0003824), Molecular Function: cofactor binding (GO:0048037), Molecular Function: hydroxymethyl-, formyl- and related transferase ac…	cbr:CBG05984 Cbr-alh-3; C. briggsae CBR-ALH-3 protein; K00289 formyltetrahydrofolate dehydrogenase [EC:1.5.1.6]%892%70.627802690583%0.0	-	-	Y		0	6	0	4	0	0	0	0	0	0	0	0	0	0	0	0	0	0
	GS_11702	-	-	Y	-	Y		K15633-2,3-bisphosphoglycerate-independent phosphoglycerate mutase	IPR017850-Alkaline-phosphatase-like, core domain IPR005995-Phosphoglycerate mutase, 2,3-bisphosphoglycerate-independent IPR011258-BPG-independent PGAM, N-terminal IPR017849-Alkaline phosphatase-like, alpha/beta/alpha IPR006124-Metalloenzyme	Biological Process: glucose catabolic process (GO:0006007), Biological Process: metabolic process (GO:0008152), Cellular Component: cytoplasm (GO:0005737), Molecular Function: catalytic activity (GO:0003824), Molecular Function: manganese ion binding (GO:0030145), Molecular Function: metal ion binding (GO:0046872), Molecular Function: phosphoglycerate mutase activity (GO:0004619)	Channels and Transporters%gnl|TC-DB|Q8Z2F0%2%Electorchemical potential-driven transporters%2.A.%"Porters (uniporters, symporters, antiporters)"%2.A.7% Drug/Metabolite Transporter (DMT) Superfamily.%2.A.7.22.2% Drug/Metabolite Transporter (DMT) Superfamily.%"2,3-bisphosphoglycerate-independent phosphoglycerate mutase OS=Salmonella typhi GN=gpmI PE=3 SV=2"%519%45.27938343%1.00E-124	-	-	Y		0	6	0	2	0	0	0	0	0	0	0	0	0	0	0	0	0	0
	GS_20947	-	-	Y	-	Y		K05767-IQ motif containing GTPase activating protein	IPR000048-IQ motif, EF-hand binding site	Molecular Function: protein binding (GO:0005515)	GTPase%pes_7 %687%27.2197962154294%8e-54	-	-	-		0	6	0	5	0	0	0	0	0	0	0	0	0	0	0	0	0	0
	GS_03769	-	-	Y	-	Y		-	IPR000873-AMP-dependent synthetase/ligase	Biological Process: metabolic process (GO:0008152), Molecular Function: catalytic activity (GO:0003824)	Channels and Transporters%gnl|TC-DB|P69451%4%Group translocators%4.C.%Acyl CoA ligase-coupled transporters%4.C.1%Acyl CoA ligase-coupled transporters%4.C.1.1.4% Proposed Fatty Acid Transporter (FAT) Family.%Long-chain-fatty-acid--CoA ligase - Escherichia coli.%127%38.58267717%1.00E-18	-	-	-		0	5	0	8	0	0	0	0	0	0	0	0	0	0	0	0	0	0
	GS_12676	-	-	Y	-	Y		K02147-V-type H+-transporting ATPase subunit B	IPR004100-ATPase, F1/V1/A1 complex, alpha/beta subunit, N-terminal IPR000194-ATPase, alpha/beta subunit, nucleotide-binding domain IPR000793-ATPase, F1/V1/A1 complex, alpha/beta subunit, C-terminal IPR022879-V-type ATP synthase regulatory subunit B/beta IPR005723-ATPase, V1 complex, subunit B IPR020003-ATPase, alpha/beta subunit, nucleotide-binding domain, active site	Biological Process: ATP hydrolysis coupled proton transport (GO:0015991), Biological Process: ATP metabolic process (GO:0046034), Biological Process: proton transport (GO:0015992), Cellular Component: proton-transporting two-sector ATPase complex (GO:0016469), Cellular Component: proton-transporting two-sector ATPase complex, catalytic domain (GO:0033178), Cellular Component: proton-transporting …	Channels and Transporters%gnl|TC-DB|P21281%3%Primary active transporters%3.A.%P-P-bond-hydrolysis-driven transporters%3.A.2%" H+- or Na+-translocating F-type, V-type and A-type ATPase (F-ATPase) Superfamily."%3.A.2.2.4%" H+- or Na+-translocating F-type, V-type and A-type ATPase (F-ATPase) Superfamily."%"Vacuolar ATP synthase subunit B, brain isoform - Homo sapiens (Human)."%476%88.23529412%0	-	-	Y		0	5	0	26	0	0	0	0	0	0	0	0	0	0	0	0	0	0
	GS_02563	-	-	Y	-	Y		K00022-3-hydroxyacyl-CoA dehydrogenase	IPR008927-6-phosphogluconate dehydrogenase, C-terminal-like IPR016040-NAD(P)-binding domain IPR013328-Dehydrogenase, multihelical IPR006108-3-hydroxyacyl-CoA dehydrogenase, C-terminal IPR006176-3-hydroxyacyl-CoA dehydrogenase, NAD binding IPR006180-3-hydroxyacyl-CoA dehydrogenase, conserved site	Biological Process: fatty acid metabolic process (GO:0006631), Molecular Function: binding (GO:0005488), Molecular Function: coenzyme binding (GO:0050662), Molecular Function: oxidoreductase activity (GO:0016491)	sp|Q0TAL0|FADB_ECOL5%%Fatty acid oxidation complex subunit alpha OS=Escherichia coli O6:K15:H31 (strain 536 / UPEC) GN=fadB PE=3 SV=1%%1.8e-143	-	Y	-		0	4	0	2	0	0	0	0	0	0	0	0	0	0	0	0	0	0
	GS_05716	-	-	Y	-	Y		-	IPR000322-Glycoside hydrolase, family 31 IPR017853-Glycoside hydrolase, superfamily	Biological Process: carbohydrate metabolic process (GO:0005975), Molecular Function: hydrolase activity, hydrolyzing O-glycosyl compounds (GO:0004553)	sp|O43451|MGA_HUMAN%%Maltase-glucoamylase, intestinal OS=Homo sapiens GN=MGAM PE=1 SV=5%%2.7e-143	-	-	-		0	4	0	2	0	0	0	0	0	0	0	0	0	0	0	0	0	0
	GS_14217	-	-	Y	-	Y		-	IPR001464-Annexin IPR018252-Annexin repeat, conserved site IPR018502-Annexin repeat	Molecular Function: calcium ion binding (GO:0005509), Molecular Function: calcium-dependent phospholipid binding (GO:0005544)	Channels and Transporters%gnl|TC-DB|P08133%1%Channel/pores%1.A.%alpha-type channels%1.A.3% Voltage-gated Ion Channel (VIC) Superfamily .%1.A.31.1.2%" Annexin (Annexin) Family.; Ryanodine-Inositol 1,4,5-triphosphate Receptor Ca2+ Channel (RIR-CaC) Family."%Annexin A6 (Annexin VI) (Lipocortin VI) (P68) (P70) (Protein III) (Chromobindin 20) (67 kDa calelectrin) (Calphobindin-II) (CPB-II) - Homo sapi…	-	-	Y		0	4	0	1	0	0	0	0	0	0	0	0	0	0	0	0	0	0
	GS_17518	-	-	Y	-	Y		K04646-clathrin heavy chain	IPR011990-Tetratricopeptide-like helical IPR016024-Armadillo-type fold IPR000547-Clathrin, heavy chain/VPS, 7-fold repeat IPR015348-Clathrin, heavy chain, linker, core motif IPR001473-Clathrin, heavy chain, propeller, N-terminal IPR016025-Clathrin, heavy chain, linker/propeller domain	Biological Process: intracellular protein transport (GO:0006886), Biological Process: vesicle-mediated transport (GO:0016192), Cellular Component: clathrin coat of coated pit (GO:0030132), Cellular Component: clathrin coat of trans-Golgi network vesicle (GO:0030130), Molecular Function: binding (GO:0005488), Molecular Function: structural molecule activity (GO:0005198)	bmy:Bm1_21545 Probable clathrin heavy chain; K04646 clathrin, heavy polypeptide%1695%90.4424778761062%0.0	-	-	-		0	4	0	11	0	0	0	0	0	0	0	0	0	0	0	0	0	0
	GS_21140	-	-	Y	-	Y		K03234-elongation factor 2	IPR009000-Translation elongation/initiation factor/Ribosomal, beta-barrel IPR014721-Ribosomal protein S5 domain 2-type fold, subgroup IPR000640-Translation elongation factor EFG/EF2, C-terminal IPR005517-Translation elongation factor EFG/EF2, domain IV IPR009022-Elongation factor G/III/V IPR000795-Protein synthesis factor, GTP-binding IPR004161-Translation elongation factor EFTu/EF1A, domain 2 IP…	Molecular Function: GTP binding (GO:0005525), Molecular Function: GTPase activity (GO:0003924)	GTPase%eft_1 %861%33.2171893147503%1e-154	-	-	Y		0	4	0	3	0	0	0	0	0	0	0	0	0	0	0	0	0	0
	GS_24155	-	-	Y	-	Y		K04437-filamin	IPR017868-Filamin/ABP280 repeat-like IPR001589-Actinin-type, actin-binding, conserved site IPR001715-Calponin homology domain IPR001298-Filamin/ABP280 repeat IPR013783-Immunoglobulin-like fold IPR014756-Immunoglobulin E-set	Molecular Function: actin binding (GO:0003779), Molecular Function: protein binding (GO:0005515)	sp|O75369|FLNB_HUMAN%%Filamin-B OS=Homo sapiens GN=FLNB PE=1 SV=2%%0	-	-	Y		0	4	0	28	0	0	0	0	0	0	0	0	0	0	0	0	0	0
	GS_02755	-	-	Y	-	Y		K01915-glutamine synthetase	IPR008146-Glutamine synthetase, catalytic domain IPR008147-Glutamine synthetase, beta-Grasp IPR014746-Glutamine synthetase/guanido kinase, catalytic domain	Biological Process: glutamine biosynthetic process (GO:0006542), Biological Process: nitrogen compound metabolic process (GO:0006807), Molecular Function: catalytic activity (GO:0003824), Molecular Function: glutamate-ammonia ligase activity (GO:0004356)	sp|P15105|GLNA_MOUSE%%Glutamine synthetase OS=Mus musculus GN=Glul PE=1 SV=6%%1.6e-152	-	-	Y		0	3	0	7	0	0	0	0	0	0	0	0	0	0	0	0	0	0
	GS_03329	-	-	Y	-	Y		K10352-myosin heavy chain	IPR004009-Myosin, N-terminal, SH3-like IPR000048-IQ motif, EF-hand binding site IPR001609-Myosin head, motor domain IPR002928-Myosin tail	Cellular Component: myosin complex (GO:0016459), Molecular Function: ATP binding (GO:0005524), Molecular Function: motor activity (GO:0003774), Molecular Function: protein binding (GO:0005515)	bmy:Bm1_00655 myosin heavy chain, nonmuscle type 1; K10352 myosin heavy chain%1958%83.9632277834525%0.0	-	-	-		0	3	0	37	0	0	0	0	0	0	0	0	0	0	0	0	0	0
	GS_07654	-	-	Y	-	Y		K02145-V-type H+-transporting ATPase subunit A	IPR004100-ATPase, F1/V1/A1 complex, alpha/beta subunit, N-terminal IPR000793-ATPase, F1/V1/A1 complex, alpha/beta subunit, C-terminal IPR020003-ATPase, alpha/beta subunit, nucleotide-binding domain, active site IPR018118-ATPase, F1/A1 complex, alpha/beta subunit, N-terminal IPR000194-ATPase, alpha/beta subunit, nucleotide-binding domain	Biological Process: ATP hydrolysis coupled proton transport (GO:0015991), Biological Process: ATP metabolic process (GO:0046034), Biological Process: proton transport (GO:0015992), Cellular Component: proton-transporting two-sector ATPase complex (GO:0016469), Cellular Component: proton-transporting two-sector ATPase complex, catalytic domain (GO:0033178), Molecular Function: ATP binding (GO:0005…	Channels and Transporters%gnl|TC-DB|P38606%3%Primary active transporters%3.A.%P-P-bond-hydrolysis-driven transporters%3.A.2%" H+- or Na+-translocating F-type, V-type and A-type ATPase (F-ATPase) Superfamily."%3.A.2.2.4%" H+- or Na+-translocating F-type, V-type and A-type ATPase (F-ATPase) Superfamily."%Vacuolar ATP synthase catalytic subunit A - Homo sapiens (Human).%654%77.06422018%0	-	-	Y		0	3	0	38	0	0	0	0	0	0	0	0	0	0	0	0	0	0
	GS_11040	-	-	Y	-	Y		K02148-V-type H+-transporting ATPase subunit C	IPR004907-ATPase, V1 complex, subunit C	Biological Process: ATP hydrolysis coupled proton transport (GO:0015991), Cellular Component: proton-transporting V-type ATPase, V1 domain (GO:0033180), Molecular Function: hydrolase activity, acting on acid anhydrides, catalyzing transmembrane movement of substances (GO:0016820)	Channels and Transporters%gnl|TC-DB|P21283%3%Primary active transporters%3.A.%P-P-bond-hydrolysis-driven transporters%3.A.2%" H+- or Na+-translocating F-type, V-type and A-type ATPase (F-ATPase) Superfamily."%3.A.2.2.4%" H+- or Na+-translocating F-type, V-type and A-type ATPase (F-ATPase) Superfamily."%Vacuolar ATP synthase subunit C 1 - Homo sapiens (Human).%381%58.53018373%1.00E-131	-	-	Y		0	3	0	8	0	0	0	0	0	0	0	0	0	0	0	0	0	0
	GS_14768	-	-	Y	-	Y		K00963-UTP--glucose-1-phosphate uridylyltransferase	IPR002618-UTP--glucose-1-phosphate uridylyltransferase	Biological Process: metabolic process (GO:0008152), Molecular Function: nucleotidyltransferase activity (GO:0016779)	bmy:Bm1_41320 UDP-glucose pyrophosphorylase; K00963 UTP--glucose-1-phosphate uridylyltransferase [EC:2.7.7.9]%491%83.0957230142566%0.0	-	-	Y		0	3	0	12	0	0	0	0	0	0	0	0	0	0	0	0	0	0
	GS_15346	-	-	Y	-	Y		-	IPR001589-Actinin-type, actin-binding, conserved site IPR018247-EF-Hand 1, calcium-binding site IPR001715-Calponin homology domain IPR011992-EF-hand-like domain	Molecular Function: actin binding (GO:0003779), Molecular Function: calcium ion binding (GO:0005509), Molecular Function: protein binding (GO:0005515)	bmy:Bm1_38330 L-plastin%596%66.2751677852349%0.0	-	-	Y		0	3	0	25	0	0	0	0	0	0	0	0	0	0	0	0	0	0
	GS_16392	-	-	Y	-	Y		-	IPR001736-Phospholipase D/Transphosphatidylase IPR013582-Phospholipase D/viral envelope	Biological Process: metabolic process (GO:0008152), Molecular Function: catalytic activity (GO:0003824)	bmy:Bm1_53890 Phospholipase D. Active site motif family protein%420%61.1904761904762%1e-151	-	Y	-		0	3	0	3	0	0	0	0	0	0	0	0	0	0	0	0	0	0
	GS_17025	-	-	Y	-	Y		K10418-dynein light chain LC8-type	IPR001372-Dynein light chain, type 1/2 IPR019763-Dynein light chain, type 1/2, conserved site	Biological Process: microtubule-based process (GO:0007017), Cellular Component: microtubule associated complex (GO:0005875)	oaa:100089910 similar to dynein, light chain, LC8-type 2; K10418 dynein light chain LC8-type%89%96.6292134831461%1e-48	-	-	-		0	3	0	10	0	0	0	0	0	0	0	0	0	0	0	0	0	0
	GS_01404	-	-	Y	-	Y		-	IPR002213-UDP-glucuronosyl/UDP-glucosyltransferase	Biological Process: metabolic process (GO:0008152), Molecular Function: transferase activity, transferring hexosyl groups (GO:0016758)	bmy:Bm1_13480 UDP-glucoronosyl and UDP-glucosyl transferase family protein; K00699 glucuronosyltransferase [EC:2.4.1.17]%322%33.5403726708075%1e-47	-	Y	-		0	2	0	8	0	0	0	0	0	0	0	0	0	0	0	0	0	0
	GS_02684	-	-	Y	-	Y		K11089-60 kDa SS-A/Ro ribonucleoprotein	IPR008858-TROVE	Cellular Component: ribonucleoprotein complex (GO:0030529), Molecular Function: RNA binding (GO:0003723)	cel:C12D8.11 rop-1; RO (Ro) ribonucleoProtein family member (rop-1); K11089 60 kDa SS-A/Ro ribonucleoprotein%697%40.0286944045911%1e-144	-	-	-		0	2	0	9	0	0	0	0	0	0	0	0	0	0	0	0	0	0
	GS_04089	-	-	Y	-	Y		-	IPR012674-Calycin IPR011038-Calycin-like	Molecular Function: binding (GO:0005488)	cel:F40F4.4 lbp-3; Lipid Binding Protein family member (lbp-3)%125%37.6%2e-10	-	Y	-		0	2	0	1	0	0	0	0	0	0	0	0	0	0	0	0	0	0
	GS_05160	-	-	Y	-	Y		K02150-V-type H+-transporting ATPase subunit E	IPR002842-ATPase, V1/A1 complex, subunit E	Biological Process: ATP hydrolysis coupled proton transport (GO:0015991), Cellular Component: proton-transporting two-sector ATPase complex, catalytic domain (GO:0033178), Molecular Function: proton-transporting ATPase activity, rotational mechanism (GO:0046961)	Channels and Transporters%gnl|TC-DB|P36543%3%Primary active transporters%3.A.%P-P-bond-hydrolysis-driven transporters%3.A.2%" H+- or Na+-translocating F-type, V-type and A-type ATPase (F-ATPase) Superfamily."%3.A.2.2.4%" H+- or Na+-translocating F-type, V-type and A-type ATPase (F-ATPase) Superfamily."%Vacuolar ATP synthase subunit E 1 - Homo sapiens (Human).%123%54.47154472%4.00E-34	-	-	-		0	2	0	12	0	0	0	0	0	0	0	0	0	0	0	0	0	0
	GS_05417	-	-	Y	-	Y		K01958-pyruvate carboxylase	IPR013816-ATP-grasp fold, subdomain 2 IPR005482-Biotin carboxylase, C-terminal IPR013785-Aldolase-type TIM barrel IPR011053-Single hybrid motif IPR000891-Pyruvate carboxyltransferase IPR003379-Carboxylase, conserved domain IPR011764-Biotin carboxylation domain IPR011054-Rudiment single hybrid motif IPR000089-Biotin/lipoyl attachment	Biological Process: metabolic process (GO:0008152), Molecular Function: ATP binding (GO:0005524), Molecular Function: biotin carboxylase activity (GO:0004075), Molecular Function: catalytic activity (GO:0003824), Molecular Function: ligase activity (GO:0016874)	Channels and Transporters%gnl|TC-DB|Q03030%3%Primary active transporters%3.B.%Decarboxylation-driven transporters%3.B.1% Na+-transporting Carboxylic Acid Decarboxylase (NaT-DC) Family.%3.B.1.1.1% Na+-transporting Carboxylic Acid Decarboxylase (NaT-DC) Family.%OXALOACETATE DECARBOXYLASE ALPHA CHAIN (EC 4.1.1.3) - Salmonella typhimurium.%675%31.11111111%1.00E-70	-	-	Y		0	2	0	7	0	0	0	0	0	0	0	0	0	0	0	0	0	0
	GS_06371	-	-	Y	-	Y		K02937-large subunit ribosomal protein L7e	IPR005998-Ribosomal protein L7, eukaryotic IPR016082-Ribosomal protein L30, ferredoxin-like fold domain IPR018038-Ribosomal protein L30, conserved site IPR012988-Ribosomal protein L30, N-terminal	Biological Process: translation (GO:0006412), Cellular Component: intracellular (GO:0005622), Cellular Component: large ribosomal subunit (GO:0015934), Cellular Component: ribosome (GO:0005840), Molecular Function: structural constituent of ribosome (GO:0003735), Molecular Function: transcription regulator activity (GO:0030528)	bmy:Bm1_24400 60S ribosomal protein L7; K02937 large subunit ribosomal protein L7e%240%80.4166666666667%1e-108	-	-	-		0	2	0	16	0	0	0	0	0	0	0	0	0	0	0	0	0	0
	GS_06634	-	-	Y	-	Y		K05863-solute carrier family 25 (mitochondrial adenine nucleotide translocator), member 4/5/6/31	IPR002113-Adenine nucleotide translocator 1 IPR018108-Mitochondrial substrate/solute carrier IPR002067-Mitochondrial carrier protein IPR023395-Mitochondrial carrier domain	Biological Process: transmembrane transport (GO:0055085), Biological Process: transport (GO:0006810), Cellular Component: mitochondrial inner membrane (GO:0005743), Molecular Function: binding (GO:0005488), Molecular Function: transporter activity (GO:0005215)	Channels and Transporters%gnl|TC-DB|P12235%2%Electorchemical potential-driven transporters%2.A.%"Porters (uniporters, symporters, antiporters)"%2.A.2%Cation Symporter Family%2.A.29.1.2% Glycoside-Pentoside-Hexuronide (GPH):Cation Symporter Family.; Mitochondrial Carrier (MC) Family .%"ADP,ATP carrier protein, heart/skeletal muscle isoform T1 (ADP/ATP translocase 1) (Adenine nucleotide translocato…	Y	-	-		0	2	0	15	0	0	0	0	0	0	0	0	0	0	0	0	0	0
	GS_10558	-	-	Y	-	Y		-	IPR020845-AMP-binding, conserved site IPR000873-AMP-dependent synthetase/ligase	Biological Process: metabolic process (GO:0008152), Molecular Function: catalytic activity (GO:0003824)	Channels and Transporters%gnl|TC-DB|Q42524%4%Group translocators%4.C.%Acyl CoA ligase-coupled transporters%4.C.1%Acyl CoA ligase-coupled transporters%4.C.1.1.7% Proposed Fatty Acid Transporter (FAT) Family.%4-coumarate--CoA ligase 1 - Arabidopsis thaliana (Mouse-ear cress).%109%34.86238532%8.00E-10	-	-	Y		0	2	0	4	0	0	0	0	0	0	0	0	0	0	0	0	0	0
	GS_14227	-	-	Y	-	Y		-	IPR001605-Spectrin/pleckstrin-like IPR002017-Spectrin repeat IPR001849-Pleckstrin homology domain IPR011993-Pleckstrin homology-type IPR018159-Spectrin/alpha-actinin	Molecular Function: protein binding (GO:0005515)	bmy:Bm1_22625 probable spectrin beta chain; K06115 spectrin beta%1717%72.2772277227723%0.0	-	-	-		0	2	0	23	0	0	0	0	0	0	0	0	0	0	0	0	0	0
	GS_15112	-	-	Y	-	Y		-	IPR002048-Calcium-binding EF-hand IPR018247-EF-Hand 1, calcium-binding site IPR018249-EF-HAND 2 IPR018248-EF-hand IPR011992-EF-hand-like domain	Molecular Function: calcium ion binding (GO:0005509)	Channels and Transporters%gnl|TC-DB|Q6KCM7%2%Electorchemical potential-driven transporters%2.A.%"Porters (uniporters, symporters, antiporters)"%2.A.2%Cation Symporter Family%2.A.29.23.1% Glycoside-Pentoside-Hexuronide (GPH):Cation Symporter Family.; Mitochondrial Carrier (MC) Family .%2.A.29.23.1 Calcium-binding mitochondrial carrier protein SCaMC-2%59%35.59322034%7.00E-06	-	-	-		0	2	0	2	0	0	0	0	0	0	0	0	0	0	0	0	0	0
	GS_15935	-	-	Y	-	Y		K00382-dihydrolipoamide dehydrogenase	IPR023753-Pyridine nucleotide-disulphide oxidoreductase, IPR004099-Pyridine nucleotide-disulphide oxidoreductase, dimerisation IPR001327-Pyridine nucleotide-disulphide oxidoreductase, NAD-binding domain IPR012999-Pyridine nucleotide-disulphide oxidoreductase, class I, active site IPR016156-FAD/NAD-linked reductase, dimerisation IPR006258-Dihydrolipoamide dehydrogenase IPR013027-FAD-dependent pyri…	Biological Process: cell redox homeostasis (GO:0045454), Biological Process: oxidation-reduction process (GO:0055114), Cellular Component: cytoplasm (GO:0005737), Molecular Function: dihydrolipoyl dehydrogenase activity (GO:0004148), Molecular Function: flavin adenine dinucleotide binding (GO:0050660), Molecular Function: oxidoreductase activity (GO:0016491)	bmy:Bm1_26290 dihydrolipoyl dehydrogenase, mitochondrial precursor, putative; K00382 dihydrolipoamide dehydrogenase [EC:1.8.1.4]%348%76.7241379310345%1e-162	-	-	Y		0	2	0	23	0	0	0	0	0	0	0	0	0	0	0	0	0	0
	GS_21097	-	-	Y	-	Y		K01679-fumarate hydratase, class II	IPR005677-Fumarate hydratase, class II IPR000362-Fumarate lyase IPR020557-Fumarate lyase, conserved site IPR018951-Fumarase C, C-terminal IPR003031-Delta crystallin IPR008948-L-Aspartase-like IPR022761-Lyase 1, N-terminal	Biological Process: fumarate metabolic process (GO:0006106), Biological Process: tricarboxylic acid cycle (GO:0006099), Cellular Component: tricarboxylic acid cycle enzyme complex (GO:0045239), Molecular Function: catalytic activity (GO:0003824), Molecular Function: fumarate hydratase activity (GO:0004333), Molecular Function: lyase activity (GO:0016829)	cel:H14A12.2 fum-1; FUMarase family member (fum-1); K01679 fumarate hydratase, class II [EC:4.2.1.2]%462%87.4458874458875%0.0	-	-	Y		0	2	0	11	0	0	0	0	0	0	0	0	0	0	0	0	0	0
	GS_21288	-	-	Y	-	Y		K06115-spectrin beta	IPR002017-Spectrin repeat IPR001589-Actinin-type, actin-binding, conserved site IPR001452-Src homology-3 domain IPR001715-Calponin homology domain IPR018159-Spectrin/alpha-actinin	Molecular Function: actin binding (GO:0003779), Molecular Function: protein binding (GO:0005515)	bmy:Bm1_22625 probable spectrin beta chain; K06115 spectrin beta%2178%78.5583103764922%0.0	-	-	-		0	2	0	39	0	0	0	0	0	0	0	0	0	0	0	0	0	0
	GS_21454	-	-	Y	-	Y		K15040-voltage-dependent anion channel protein 2	IPR001925-Porin, eukaryotic type	Biological Process: anion transport (GO:0006820), Biological Process: regulation of anion transport (GO:0044070), Biological Process: transmembrane transport (GO:0055085), Cellular Component: mitochondrial outer membrane (GO:0005741), Molecular Function: voltage-gated anion channel activity (GO:0008308)	Channels and Transporters%gnl|TC-DB|Q94920%1%Channel/pores%1.B.%beta-barrel porins%1.B.8%Outermembrane Porins%1.B.8.1.6% Mitochondrial and Plastid Porin (MPP) Family.%Voltage-dependent anion-selective channel - Drosophila melanogaster (Fruit fly).%261%37.16475096%1.00E-45	-	-	-		0	2	0	8	0	0	0	0	0	0	0	0	0	0	0	0	0	0
	GS_21766	-	-	Y	-	Y		K00031-isocitrate dehydrogenase	IPR004790-Isocitrate dehydrogenase NADP-dependent, eukaryotic IPR019818-Isocitrate/isopropylmalate dehydrogenase, conserved site	Biological Process: isocitrate metabolic process (GO:0006102), Biological Process: oxidation-reduction process (GO:0055114), Molecular Function: isocitrate dehydrogenase (NADP+) activity (GO:0004450), Molecular Function: magnesium ion binding (GO:0000287), Molecular Function: NAD binding (GO:0051287), Molecular Function: oxidoreductase activity, acting on the CH-OH group of donors, NAD or NADP as…	sp|Q5HNL1|IDH_STAEQ%%Isocitrate dehydrogenase [NADP] OS=Staphylococcus epidermidis (strain ATCC 35984 / RP62A) GN=icd PE=3 SV=1%%2.9e-144	-	-	Y		0	2	0	9	0	0	0	0	0	0	0	0	0	0	0	0	0	0
	GS_23821	-	-	Y	-	Y		-	IPR000519-P-type trefoil IPR000322-Glycoside hydrolase, family 31	Biological Process: carbohydrate metabolic process (GO:0005975), Molecular Function: hydrolase activity, hydrolyzing O-glycosyl compounds (GO:0004553)	sp|P14410|SUIS_HUMAN%%Sucrase-isomaltase, intestinal OS=Homo sapiens GN=SI PE=1 SV=5%%2.5e-98	-	Y	-		0	2	0	3	0	0	0	0	0	0	0	0	0	0	0	0	0	0
	GS_00010	-	-	Y	-	Y		K00235-succinate dehydrogenase (ubiquinone) iron-sulfur subunit	IPR001041-Ferredoxin IPR017900-4Fe-4S ferredoxin, iron-sulphur binding, conserved site IPR012285-Fumarate reductase, C-terminal IPR012675-Beta-grasp fold, ferredoxin-type IPR009051-Alpha-helical ferredoxin IPR006058-2Fe-2S ferredoxin, iron-sulphur binding site IPR017896-4Fe-4S ferredoxin, iron-sulpur binding domain IPR004489-Succinate dehydrogenase/fumarate reductase iron-sulphur protein	Biological Process: oxidation-reduction process (GO:0055114), Biological Process: tricarboxylic acid cycle (GO:0006099), Molecular Function: 2 iron, 2 sulfur cluster binding (GO:0051537), Molecular Function: electron carrier activity (GO:0009055), Molecular Function: iron-sulfur cluster binding (GO:0051536), Molecular Function: oxidoreductase activity (GO:0016491)	Channels and Transporters%gnl|TC-DB|Q65GF5%5%Transport electron carriers%5.A.%Transmembrane 2-electron transfer carriers%5.A.4%Transmembrane 2-electron transfer carriers%5.A.4.1.1% Prokaryotic Succinate Dehydrogenase (SDH) Family.%SdhB OS=Bacillus licheniformis (strain DSM 13 / ATCC 14580) GN=sdhB PE=4 SV=1%197%26.9035533%2.00E-12	-	-	Y		0	1	0	9	0	0	0	0	0	0	0	0	0	0	0	0	0	0
	GS_00038	-	-	Y	-	Y		-	-	-	Hypothetical protein	-	-	-		0	1	0	29	0	0	0	0	0	0	0	0	0	0	0	0	0	0
	GS_00894	-	-	Y	-	Y		-	IPR011012-Longin-like IPR022775-AP complex, mu/sigma subunit IPR008968-Clathrin adaptor, mu subunit, C-terminal	Biological Process: intracellular protein transport (GO:0006886), Biological Process: transport (GO:0006810), Biological Process: vesicle-mediated transport (GO:0016192), Cellular Component: clathrin adaptor complex (GO:0030131), Molecular Function: protein binding (GO:0005515)	bmy:Bm1_44825 Probable coatomer delta subunit%517%74.6615087040619%0.0	-	-	Y		0	1	0	1	0	0	0	0	0	0	0	0	0	0	0	0	0	0
	GS_01240	-	-	Y	-	Y		K07375-tubulin beta	IPR018316-Tubulin/FtsZ, 2-layer sandwich domain IPR008280-Tubulin/FtsZ, C-terminal IPR003008-Tubulin/FtsZ, GTPase domain IPR002453-Beta tubulin IPR000217-Tubulin IPR013838-Beta tubulin, autoregulation binding site IPR023123-Tubulin, C-terminal IPR017975-Tubulin, conserved site	Biological Process: GTP catabolic process (GO:0006184), Biological Process: microtubule-based movement (GO:0007018), Biological Process: microtubule-based process (GO:0007017), Biological Process: protein polymerization (GO:0051258), Cellular Component: microtubule (GO:0005874), Cellular Component: protein complex (GO:0043234), Molecular Function: GTP binding (GO:0005525), Molecular Function: GTP…	cel:C54C6.2 ben-1; BENzimidazole resistant family member (ben-1); K07375 tubulin beta%437%90.6178489702517%0.0	-	-	Y		0	1	0	9	0	0	0	0	0	0	0	0	0	0	0	0	0	0
	GS_01787	-	-	Y	-	Y		K02132-F-type H+-transporting ATPase subunit alpha	IPR004100-ATPase, F1/V1/A1 complex, alpha/beta subunit, N-terminal IPR000793-ATPase, F1/V1/A1 complex, alpha/beta subunit, C-terminal IPR023366-ATPase, F1/A1 complex, alpha subunit, N-terminal IPR020003-ATPase, alpha/beta subunit, nucleotide-binding domain, active site IPR018118-ATPase, F1/A1 complex, alpha/beta subunit, N-terminal IPR005294-ATPase, F1 complex, alpha subunit IPR000194-ATPase, alp…	Biological Process: ATP hydrolysis coupled proton transport (GO:0015991), Biological Process: ATP metabolic process (GO:0046034), Biological Process: ATP synthesis coupled proton transport (GO:0015986), Biological Process: proton transport (GO:0015992), Cellular Component: proton-transporting ATP synthase complex, catalytic core F(1) (GO:0045261), Cellular Component: proton-transporting two-secto…	Channels and Transporters%gnl|TC-DB|P07251%3%Primary active transporters%3.A.%P-P-bond-hydrolysis-driven transporters%3.A.2%" H+- or Na+-translocating F-type, V-type and A-type ATPase (F-ATPase) Superfamily."%3.A.2.1.3%" H+- or Na+-translocating F-type, V-type and A-type ATPase (F-ATPase) Superfamily."%"ATP synthase alpha chain, mitochondrial precursor (EC 3.6.1.34) - Saccharomyces cerevisiae (Ba…	-	-	Y		0	1	0	10	0	0	0	0	0	0	0	0	0	0	0	0	0	0
	GS_02386	-	-	Y	-	Y		K02865-large subunit ribosomal protein L10Ae	IPR016094-Ribosomal protein L1, 2-layer alpha/beta-sandwich IPR023674-Ribosomal protein L1, superfamily IPR002143-Ribosomal protein L1 IPR023673-Ribosomal protein L1, conserved site IPR016095-Ribosomal protein L1, 3-layer alpha/beta-sandwich	Biological Process: translation (GO:0006412), Cellular Component: intracellular (GO:0005622), Cellular Component: large ribosomal subunit (GO:0015934), Cellular Component: ribosome (GO:0005840), Molecular Function: RNA binding (GO:0003723), Molecular Function: structural constituent of ribosome (GO:0003735)	bmy:Bm1_01805 60S ribosomal protein L10a; K02865 large subunit ribosomal protein L10Ae%216%90.2777777777778%1e-102	-	-	-		0	1	0	3	0	0	0	0	0	0	0	0	0	0	0	0	0	0
	GS_02850	-	-	Y	-	Y		-	IPR002048-Calcium-binding EF-hand IPR018247-EF-Hand 1, calcium-binding site IPR018249-EF-HAND 2 IPR011992-EF-hand-like domain	Molecular Function: calcium ion binding (GO:0005509)	cbr:CBG14576 Cbr-calu-1; C. briggsae CBR-CALU-1 protein%314%80.5732484076433%1e-150	-	Y	-		0	1	0	3	0	0	0	0	0	0	0	0	0	0	0	0	0	0
	GS_02923	-	-	Y	-	Y		K00605-aminomethyltransferase	IPR006223-Glycine cleavage system T protein IPR006222-Glycine cleavage T-protein, N-terminal IPR013977-Glycine cleavage T-protein, C-terminal barrel	Biological Process: glycine catabolic process (GO:0006546), Cellular Component: cytoplasm (GO:0005737), Molecular Function: aminomethyltransferase activity (GO:0004047)	sp|Q8RCV9|GCST_THETN%%Aminomethyltransferase OS=Thermoanaerobacter tengcongensis GN=gcvT PE=3 SV=1%%4.7e-157	-	-	Y		0	1	0	6	0	0	0	0	0	0	0	0	0	0	0	0	0	0
	GS_03433	-	-	Y	-	Y		-	-	-	C18H7.1%CE27718 WBGene00015993 status:Confirmed UniProt:Q9GZF5_CAEEL protein_id:AAF98615.2%HMM_hit%1.6e-55	-	-	Y		0	1	0	6	0	0	0	0	0	0	0	0	0	0	0	0	0	0
	GS_03736	-	-	Y	-	Y		K08770-ubiquitin C	IPR019954-Ubiquitin conserved site IPR000626-Ubiquitin IPR019955-Ubiquitin supergroup IPR019956-Ubiquitin subgroup	Molecular Function: protein binding (GO:0005515)	nvi:100115399 NV18414; similar to polyubiquitin; K08770 ubiquitin C%608%100%0.0	-	-	Y		0	1	0	8	0	0	0	0	0	0	0	0	0	0	0	0	0	0
	GS_03836	-	-	Y	-	Y		-	-	-	Hypothetical protein	-	-	-		0	1	0	2	0	0	0	0	0	0	0	0	0	0	0	0	0	0
	GS_04292	-	-	Y	-	Y		K12667-oligosaccharyltransferase complex subunit delta (ribophorin II)	IPR008814-Ribophorin II	Biological Process: protein N-linked glycosylation via asparagine (GO:0018279), Cellular Component: endoplasmic reticulum membrane (GO:0005789), Cellular Component: oligosaccharyltransferase complex (GO:0008250), Molecular Function: dolichyl-diphosphooligosaccharide-protein glycotransferase activity (GO:0004579)	bmy:Bm1_30625 ribophorin II; K12667 oligosaccharyltransferase complex subunit delta (ribophorin II)%575%61.2173913043478%0.0	Y	-	-		0	1	0	11	0	0	0	0	0	0	0	0	0	0	0	0	0	0
	GS_04531	-	-	Y	-	Y		-	IPR010987-Glutathione S-transferase, C-terminal-like	-	Channels and Transporters%gnl|TC-DB|Q9Y696%1%Channel/pores%1.A.%alpha-type channels%1.A.1% Voltage-gated Ion Channel (VIC) Superfamily .%1.A.12.1.6% Intracellular Chloride Channel (CLIC) Family.; Voltage-gated Ion Channel (VIC) Superfamily .%Chloride intracellular channel protein 4 - Homo sapiens (Human).%254%27.16535433%1.00E-14	-	-	Y		0	1	0	11	0	0	0	0	0	0	0	0	0	0	0	0	0	0
	GS_04763	-	-	Y	-	Y		K03257-translation initiation factor 4A	IPR001650-Helicase, C-terminal IPR014001-DEAD-like helicase IPR000629-RNA helicase, ATP-dependent, DEAD-box, conserved site IPR011545-DNA/RNA helicase, DEAD/DEAH box type, N-terminal IPR014014-RNA helicase, DEAD-box type, Q motif	Molecular Function: ATP binding (GO:0005524), Molecular Function: ATP-dependent helicase activity (GO:0008026), Molecular Function: helicase activity (GO:0004386), Molecular Function: nucleic acid binding (GO:0003676)	Channels and Transporters%gnl|TC-DB|P38919%3%Primary active transporters%3.A.%P-P-bond-hydrolysis-driven transporters%3.A.1% ATP-binding Cassette (ABC) Superfamily.%3.A.18.1.1% ATP-binding Cassette (ABC) Superfamily.; Nuclear mRNA Exporter (mRNA-E) Family.%Eukaryotic initiation factor 4A-III - Homo sapiens (Human).%376%68.61702128%1.00E-160	-	-	Y		0	1	0	7	0	0	0	0	0	0	0	0	0	0	0	0	0	0
	GS_04910	-	-	Y	-	Y		-	IPR001715-Calponin homology domain IPR003096-Smooth muscle protein/calponin IPR000557-Calponin repeat	Molecular Function: protein binding (GO:0005515)	bmy:Bm1_35745 CPN-1%191%72.7748691099476%2e-77	-	-	-		0	1	0	4	0	0	0	0	0	0	0	0	0	0	0	0	0	0
	GS_04929	-	-	Y	-	Y		-	IPR004217-Mitochondrial inner membrane translocase complex, Tim8/9/10/13-zinc finger-like	Biological Process: protein import into mitochondrial inner membrane (GO:0045039), Biological Process: protein targeting to mitochondrion (GO:0006626), Cellular Component: mitochondrial intermembrane space protein transporter complex (GO:0042719)	Channels and Transporters%gnl|TC-DB|P57744%3%Primary active transporters%3.A.%P-P-bond-hydrolysis-driven transporters%3.A.8% Mitochondrial Protein Translocase (MPT) Family.%3.A.8.1.1% Mitochondrial Protein Translocase (MPT) Family.%Mitochondrial import inner membrane translocase subunit TIM8 - Saccharomyces cerevisiae (Baker's yeast).%75%34.66666667%2.00E-06	-	-	-		0	1	0	2	0	0	0	0	0	0	0	0	0	0	0	0	0	0
	GS_05850	-	-	Y	-	Y		K02985-small subunit ribosomal protein S3e	IPR009019-K Homology, prokaryotic type IPR005703-Ribosomal protein S3, eukaryotic/archaeal IPR001351-Ribosomal protein S3, C-terminal IPR018280-Ribosomal protein S3, conserved site IPR004044-K Homology, type 2 IPR015946-K homology domain-like, alpha/beta	Biological Process: translation (GO:0006412), Cellular Component: intracellular (GO:0005622), Cellular Component: ribosome (GO:0005840), Cellular Component: small ribosomal subunit (GO:0015935), Molecular Function: RNA binding (GO:0003723), Molecular Function: structural constituent of ribosome (GO:0003735)	bmy:Bm1_11880 40S ribosomal protein S3; K02985 small subunit ribosomal protein S3e%249%88.3534136546185%1e-127	-	-	-		0	1	0	8	0	0	0	0	0	0	0	0	0	0	0	0	0	0
	GS_06505	-	-	Y	-	Y		K02149-V-type H+-transporting ATPase subunit D	IPR002699-ATPase, V1/A1 complex, subunit D	Biological Process: ATP hydrolysis coupled proton transport (GO:0015991), Cellular Component: proton-transporting two-sector ATPase complex, catalytic domain (GO:0033178), Molecular Function: ATPase activity, coupled to transmembrane movement of substances (GO:0042626), Molecular Function: proton-transporting ATPase activity, rotational mechanism (GO:0046961)	Channels and Transporters%gnl|TC-DB|P32610%3%Primary active transporters%3.A.%P-P-bond-hydrolysis-driven transporters%3.A.2%" H+- or Na+-translocating F-type, V-type and A-type ATPase (F-ATPase) Superfamily."%3.A.2.2.3%" H+- or Na+-translocating F-type, V-type and A-type ATPase (F-ATPase) Superfamily."%VACUOLAR ATP SYNTHASE SUBUNIT D (EC 3.6.1.34) (V-ATPASE D SUBUNIT) (VACUOLAR PROTON PUMP D SUBU…	-	-	-		0	1	0	11	0	0	0	0	0	0	0	0	0	0	0	0	0	0
	GS_06775	-	-	Y	-	Y		K03966-NADH dehydrogenase (ubiquinone) 1 beta subcomplex 10	IPR019377-NADH-ubiquinone oxidoreductase, subunit 10	-	Channels and Transporters%gnl|TC-DB|Q9DCS9%3%Primary active transporters%3.D.%Oxidoreduction-driven transporters%3.D.1%Oxidoreduction-driven transporters%3.D.1.6.1% H+ or Na+-translocating NADH Dehydrogenase (NDH) Family.%NADH dehydrogenase [ubiquinone] 1 beta subcomplex subunit 10 - Mus musculus (Mouse).%149%35.5704698%5.00E-16	-	-	-		0	1	0	4	0	0	0	0	0	0	0	0	0	0	0	0	0	0
	GS_06887	-	-	Y	-	Y		-	IPR015939-Fumarate reductase/succinate dehydrogenase flavoprotein-like, C-terminal IPR004112-Fumarate reductase/succinate dehydrogenase flavoprotein, C-terminal IPR003953-Fumarate reductase/succinate dehydrogenase flavoprotein, N-terminal	Biological Process: oxidation-reduction process (GO:0055114), Molecular Function: electron carrier activity (GO:0009055), Molecular Function: oxidoreductase activity (GO:0016491)	Channels and Transporters%gnl|TC-DB|Q65GF4%5%Transport electron carriers%5.A.%Transmembrane 2-electron transfer carriers%5.A.4%Transmembrane 2-electron transfer carriers%5.A.4.1.1% Prokaryotic Succinate Dehydrogenase (SDH) Family.%SdhA OS=Bacillus licheniformis (strain DSM 13 / ATCC 14580) GN=sdhA PE=4 SV=1%205%31.70731707%2.00E-16	-	-	-		0	1	0	24	0	0	0	0	0	0	0	0	0	0	0	0	0	0
	GS_07700	-	-	Y	-	Y		-	-	-	Hypothetical protein	-	-	-		0	1	0	53	0	0	0	0	0	0	0	0	0	0	0	0	0	0
	GS_07954	-	-	Y	-	Y		-	IPR003953-Fumarate reductase/succinate dehydrogenase flavoprotein, N-terminal IPR003952-Fumarate reductase/succinate dehydrogenase, FAD-binding site	Biological Process: oxidation-reduction process (GO:0055114), Molecular Function: electron carrier activity (GO:0009055), Molecular Function: oxidoreductase activity (GO:0016491)	Channels and Transporters%gnl|TC-DB|Q65GF4%5%Transport electron carriers%5.A.%Transmembrane 2-electron transfer carriers%5.A.4%Transmembrane 2-electron transfer carriers%5.A.4.1.1% Prokaryotic Succinate Dehydrogenase (SDH) Family.%SdhA OS=Bacillus licheniformis (strain DSM 13 / ATCC 14580) GN=sdhA PE=4 SV=1%332%29.51807229%5.00E-29	-	-	Y		0	1	0	26	0	0	0	0	0	0	0	0	0	0	0	0	0	0
	GS_08210	-	-	Y	-	Y		K09500-T-complex protein 1 subunit theta	IPR002194-Chaperonin TCP-1, conserved site IPR002423-Chaperonin Cpn60/TCP-1 IPR017998-Chaperone, tailless complex polypeptide 1 IPR012721-T-complex protein 1, theta subunit	Biological Process: cellular protein metabolic process (GO:0044267), Biological Process: protein folding (GO:0006457), Molecular Function: ATP binding (GO:0005524), Molecular Function: unfolded protein binding (GO:0051082)	bmy:Bm1_48160 T-complex protein 1 theta subunit; K09500 T-complex protein 1 subunit theta%458%76.8558951965066%0.0	-	-	Y		0	1	0	2	0	0	0	0	0	0	0	0	0	0	0	0	0	0
	GS_08362	-	-	Y	-	Y		K02868-large subunit ribosomal protein L11e	IPR020929-Ribosomal protein L5, conserved site IPR022803-Ribosomal protein L5 domain IPR002132-Ribosomal protein L5	Biological Process: translation (GO:0006412), Cellular Component: intracellular (GO:0005622), Cellular Component: ribosome (GO:0005840), Molecular Function: structural constituent of ribosome (GO:0003735)	bmy:Bm1_04440 60S ribosomal protein L11; K02868 large subunit ribosomal protein L11e%194%94.8453608247423%1e-103	-	-	-		0	1	0	13	0	0	0	0	0	0	0	0	0	0	0	0	0	0
	GS_08749	-	-	Y	-	Y		K01897-long-chain acyl-CoA synthetase	IPR020845-AMP-binding, conserved site IPR000873-AMP-dependent synthetase/ligase	Biological Process: metabolic process (GO:0008152), Molecular Function: catalytic activity (GO:0003824)	Channels and Transporters%gnl|TC-DB|P69451%4%Group translocators%4.C.%Acyl CoA ligase-coupled transporters%4.C.1%Acyl CoA ligase-coupled transporters%4.C.1.1.4% Proposed Fatty Acid Transporter (FAT) Family.%Long-chain-fatty-acid--CoA ligase - Escherichia coli.%328%27.43902439%3.00E-27	-	-	Y		0	1	0	24	0	0	0	0	0	0	0	0	0	0	0	0	0	0
	GS_08789	-	-	Y	-	Y		K01647-citrate synthase	IPR016142-Citrate synthase-like, large alpha subdomain IPR002020-Citrate synthase-like IPR010109-Citrate synthase, eukaryotic IPR016141-Citrate synthase-like, core IPR019810-Citrate synthase active site	Biological Process: cellular carbohydrate metabolic process (GO:0044262), Biological Process: tricarboxylic acid cycle (GO:0006099), Molecular Function: citrate (Si)-synthase activity (GO:0004108), Molecular Function: transferase activity, transferring acyl groups, acyl groups converted into alkyl on transfer (GO:0046912)	bmy:Bm1_19445 Probable citrate synthase, mitochondrial precursor, putative; K01647 citrate synthase [EC:2.3.3.1]%398%77.8894472361809%0.0	Y	-	-		0	1	0	3	0	0	0	0	0	0	0	0	0	0	0	0	0	0
	GS_09550	-	-	Y	-	Y		-	IPR001715-Calponin homology domain	Molecular Function: protein binding (GO:0005515)	bmy:Bm1_38330 L-plastin%65%78.4615384615385%3e-23	-	-	-		0	1	0	4	0	0	0	0	0	0	0	0	0	0	0	0	0	0
	GS_09778	-	-	Y	-	Y		K07953-GTP-binding protein SAR1	IPR006689-ARF/SAR superfamily IPR006687-Small GTPase SAR1-type IPR006688-ADP-ribosylation factor IPR005225-Small GTP-binding protein domain	Biological Process: intracellular protein transport (GO:0006886), Biological Process: small GTPase mediated signal transduction (GO:0007264), Cellular Component: intracellular (GO:0005622), Molecular Function: GTP binding (GO:0005525)	GTPase%sar_1 %193%76.6839378238342%1e-90	-	-	-		0	1	0	3	0	0	0	0	0	0	0	0	0	0	0	0	0	0
	GS_10463	-	-	Y	-	Y		-	IPR002198-Short-chain dehydrogenase/reductase SDR IPR002347-Glucose/ribitol dehydrogenase IPR016040-NAD(P)-binding domain	Biological Process: metabolic process (GO:0008152), Biological Process: oxidation-reduction process (GO:0055114), Molecular Function: binding (GO:0005488), Molecular Function: oxidoreductase activity (GO:0016491)	sp|P22414|FOX2_CANTR%%Peroxisomal hydratase-dehydrogenase-epimerase OS=Candida tropicalis PE=1 SV=2%%8.5e-97	-	-	Y		0	1	0	1	0	0	0	0	0	0	0	0	0	0	0	0	0	0
	GS_10582	-	-	Y	-	Y		-	IPR002085-Alcohol dehydrogenase superfamily, zinc-containing IPR016040-NAD(P)-binding domain IPR013149-Alcohol dehydrogenase, C-terminal	Biological Process: oxidation-reduction process (GO:0055114), Molecular Function: binding (GO:0005488), Molecular Function: oxidoreductase activity (GO:0016491), Molecular Function: zinc ion binding (GO:0008270)	bmy:Bm1_31850 oxidoreductase, zinc-binding dehydrogenase family protein; K07512 mitochondrial trans-2-enoyl-CoA reductase [EC:1.3.1.38]%168%57.1428571428571%7e-50	-	Y	-		0	1	0	1	0	0	0	0	0	0	0	0	0	0	0	0	0	0
	GS_10726	-	-	Y	-	Y		K00281-glycine dehydrogenase	IPR015421-Pyridoxal phosphate-dependent transferase, major region, subdomain 1 IPR020581-Glycine cleavage system P protein IPR003437-Glycine cleavage system P protein, homodimeric IPR015424-Pyridoxal phosphate-dependent transferase, major domain IPR020580-Glycine cleavage system P-protein, N-terminal	Biological Process: glycine metabolic process (GO:0006544), Biological Process: oxidation-reduction process (GO:0055114), Molecular Function: catalytic activity (GO:0003824), Molecular Function: glycine dehydrogenase (decarboxylating) activity (GO:0004375), Molecular Function: pyridoxal phosphate binding (GO:0030170)	sp|A0K321|GCSP_BURCH%%Glycine dehydrogenase [decarboxylating] OS=Burkholderia cenocepacia (strain HI2424) GN=gcvP PE=3 SV=1%%0	-	-	Y		0	1	0	13	0	0	0	0	0	0	0	0	0	0	0	0	0	0
	GS_10751	-	-	Y	-	Y		-	IPR002423-Chaperonin Cpn60/TCP-1 IPR017998-Chaperone, tailless complex polypeptide 1	Biological Process: cellular protein metabolic process (GO:0044267), Molecular Function: ATP binding (GO:0005524)	bmy:Bm1_56580 chaperonine protein HSP60; K04077 chaperonin GroEL%253%84.9802371541502%1e-118	-	-	Y		0	1	0	7	0	0	0	0	0	0	0	0	0	0	0	0	0	0
	GS_10985	-	-	Y	-	Y		K02997-small subunit ribosomal protein S9e	IPR018079-Ribosomal protein S4, conserved site IPR022801-Ribosomal protein S4/S9 IPR001912-Ribosomal protein S4/S9, N-terminal IPR002942-RNA-binding S4 IPR005710-Ribosomal protein S4/S9, eukaryotic/archaeal	Biological Process: translation (GO:0006412), Cellular Component: intracellular (GO:0005622), Cellular Component: small ribosomal subunit (GO:0015935), Molecular Function: RNA binding (GO:0003723), Molecular Function: rRNA binding (GO:0019843), Molecular Function: structural constituent of ribosome (GO:0003735)	bmy:Bm1_15065 40S ribosomal protein S9; K02997 small subunit ribosomal protein S9e%192%74.4791666666667%4e-70	-	-	-		0	1	0	4	0	0	0	0	0	0	0	0	0	0	0	0	0	0
	GS_11043	-	-	Y	-	Y		K02144-V-type H+-transporting ATPase 54 kD subunit	IPR011987-ATPase, V1 complex, subunit H, C-terminal IPR004908-ATPase, V1 complex, subunit H IPR016024-Armadillo-type fold IPR011989-Armadillo-like helical	Biological Process: ATP hydrolysis coupled proton transport (GO:0015991), Cellular Component: vacuolar proton-transporting V-type ATPase, V1 domain (GO:0000221), Molecular Function: binding (GO:0005488), Molecular Function: hydrolase activity, acting on acid anhydrides, catalyzing transmembrane movement of substances (GO:0016820), Molecular Function: proton-transporting ATPase activity, rotationa…	Channels and Transporters%gnl|TC-DB|Q9UI12%3%Primary active transporters%3.A.%P-P-bond-hydrolysis-driven transporters%3.A.2%" H+- or Na+-translocating F-type, V-type and A-type ATPase (F-ATPase) Superfamily."%3.A.2.2.4%" H+- or Na+-translocating F-type, V-type and A-type ATPase (F-ATPase) Superfamily."%Vacuolar ATP synthase subunit H - Homo sapiens (Human).%473%54.54545455%1.00E-148	-	-	Y		0	1	0	12	0	0	0	0	0	0	0	0	0	0	0	0	0	0
	GS_11401	-	-	Y	-	Y		-	-	-	sp|P15989|CO6A3_CHICK%%Collagen alpha-3(VI) chain OS=Gallus gallus GN=COL6A3 PE=2 SV=2%%1.2e-222	-	-	-		0	1	0	16	0	0	0	0	0	0	0	0	0	0	0	0	0	0
	GS_11892	-	-	Y	-	Y		-	IPR000560-Histidine phosphatase superfamily, clade-2	Molecular Function: acid phosphatase activity (GO:0003993)	bmy:Bm1_24820 Histidine acid phosphatase family protein%422%40.0473933649289%6e-80	-	-	Y		0	1	0	8	0	0	0	0	0	0	0	0	0	0	0	0	0	0
	GS_13057	-	-	Y	-	Y		-	IPR006353-HAD-superfamily hydrolase, subfamily IIA, CECR5 IPR023214-HAD-like domain IPR006357-HAD-superfamily hydrolase, subfamily IIA	Biological Process: metabolic process (GO:0008152), Molecular Function: hydrolase activity (GO:0016787)	sp|Q91WM2|CECR5_MOUSE%%Cat eye syndrome critical region protein 5 homolog OS=Mus musculus GN=Cecr5 PE=2 SV=1%%5.8e-156	-	-	Y		0	1	0	13	0	0	0	0	0	0	0	0	0	0	0	0	0	0
	GS_13913	-	-	Y	-	Y		K00164-2-oxoglutarate dehydrogenase E1 component	IPR005475-Transketolase-like, pyrimidine-binding domain IPR001017-Dehydrogenase, E1 component IPR011603-2-oxoglutarate dehydrogenase, E1 component	Biological Process: glycolysis (GO:0006096), Biological Process: metabolic process (GO:0008152), Molecular Function: oxidoreductase activity, acting on the aldehyde or oxo group of donors, disulfide as acceptor (GO:0016624), Molecular Function: oxoglutarate dehydrogenase (succinyl-transferring) activity (GO:0004591), Molecular Function: thiamine pyrophosphate binding (GO:0030976)	bmy:Bm1_31540 2-oxoglutarate dehydrogenase E1 component, mitochondrial precursor (EC:1.2.4.2); K00164 2-oxoglutarate dehydrogenase E1 component [EC:1.2.4.2]%1020%72.843137254902%0.0	-	-	Y		0	1	0	21	0	0	0	0	0	0	0	0	0	0	0	0	0	0
	GS_13960	-	-	Y	-	Y		K00934-arginine kinase	IPR022414-ATP:guanido phosphotransferase, catalytic domain IPR014746-Glutamine synthetase/guanido kinase, catalytic domain IPR022413-ATP:guanido phosphotransferase, N-terminal IPR000749-ATP:guanido phosphotransferase	Molecular Function: catalytic activity (GO:0003824), Molecular Function: kinase activity (GO:0016301), Molecular Function: transferase activity, transferring phosphorus-containing groups (GO:0016772)	sp|P18294|KCRF_STRPU%%Creatine kinase, flagellar OS=Strongylocentrotus purpuratus PE=1 SV=1%%0	-	Y	-		0	1	0	11	0	0	0	0	0	0	0	0	0	0	0	0	0	0
	GS_14116	-	-	Y	-	Y		K02151-V-type H+-transporting ATPase subunit F	IPR008218-ATPase, V1/A1 complex, subunit F IPR005772-ATPase, V1 complex, subunit F, eukaryotic	Biological Process: ATP hydrolysis coupled proton transport (GO:0015991), Cellular Component: proton-transporting two-sector ATPase complex, catalytic domain (GO:0033178), Cellular Component: proton-transporting V-type ATPase, V1 domain (GO:0033180), Molecular Function: hydrogen ion transporting ATP synthase activity, rotational mechanism (GO:0046933), Molecular Function: proton-transporting ATPa…	Channels and Transporters%gnl|TC-DB|Q16864%3%Primary active transporters%3.A.%P-P-bond-hydrolysis-driven transporters%3.A.2%" H+- or Na+-translocating F-type, V-type and A-type ATPase (F-ATPase) Superfamily."%3.A.2.2.4%" H+- or Na+-translocating F-type, V-type and A-type ATPase (F-ATPase) Superfamily."%Vacuolar ATP synthase subunit F - Homo sapiens (Human).%118%57.62711864%1.00E-38	-	-	-		0	1	0	5	0	0	0	0	0	0	0	0	0	0	0	0	0	0
	GS_15964	-	-	Y	-	Y		K02942-large subunit ribosomal protein LP1	IPR001813-Ribosomal protein 60S	Biological Process: translational elongation (GO:0006414), Cellular Component: intracellular (GO:0005622), Cellular Component: ribosome (GO:0005840), Molecular Function: structural constituent of ribosome (GO:0003735)	dwi:Dwil_GK24637 GK24637 gene product from transcript GK24637-RA; K02942 large subunit ribosomal protein LP1%113%67.2566371681416%6e-27	-	-	-		0	1	0	2	0	0	0	0	0	0	0	0	0	0	0	0	0	0
	GS_16414	-	-	Y	-	Y		-	IPR009673-Protein of unknown function DUF1261	-	F49C12.14%CE03374 WBGene00009883 status:Confirmed UniProt:Q20590_CAEEL protein_id:CAA92516.1%HMM_hit%1.6e-38	-	-	-		0	1	0	6	0	0	0	0	0	0	0	0	0	0	0	0	0	0
	GS_17275	-	-	Y	-	Y		K02966-small subunit ribosomal protein S19e	IPR001266-Ribosomal protein S19e IPR018277-Ribosomal protein S19e, conserved site	Biological Process: translation (GO:0006412), Cellular Component: intracellular (GO:0005622), Cellular Component: ribosome (GO:0005840), Molecular Function: structural constituent of ribosome (GO:0003735)	bmy:Bm1_18840 40S ribosomal protein S19S; K02966 small subunit ribosomal protein S19e%149%87.9194630872483%5e-72	-	-	-		0	1	0	2	0	0	0	0	0	0	0	0	0	0	0	0	0	0
	GS_18120	-	-	Y	-	Y		K00026-malate dehydrogenase	IPR022383-Lactate/malate dehydrogenase, C-terminal IPR015955-Lactate dehydrogenase/glycoside hydrolase, family 4, C-terminal IPR010097-Malate dehydrogenase, type 1 IPR016040-NAD(P)-binding domain IPR001236-Lactate/malate dehydrogenase, N-terminal IPR001252-Malate dehydrogenase, active site	Biological Process: carbohydrate metabolic process (GO:0005975), Biological Process: malate metabolic process (GO:0006108), Biological Process: oxidation-reduction process (GO:0055114), Molecular Function: binding (GO:0005488), Molecular Function: catalytic activity (GO:0003824), Molecular Function: L-malate dehydrogenase activity (GO:0030060), Molecular Function: malate dehydrogenase activity (G…	cbr:CBG15213 Cbr-mdh-1; C. briggsae CBR-MDH-1 protein; K00026 malate dehydrogenase [EC:1.1.1.37]%340%72.3529411764706%1e-140	-	-	Y		0	1	0	11	0	0	0	0	0	0	0	0	0	0	0	0	0	0
	GS_18779	-	-	Y	-	Y		-	IPR011323-Mss4/translationally controlled tumour-associated TCTP IPR011057-Mss4-like IPR018103-Translationally controlled tumour protein, conserved site IPR018105-Translationally controlled tumour protein	-	bmy:Bm1_31480 Translationally controlled tumor protein%171%85.3801169590643%1e-80	-	Y	-		0	1	0	1	0	0	0	0	0	0	0	0	0	0	0	0	0	0
	GS_18853	-	-	Y	-	Y		-	IPR011935-Conserved hypothetical protein CHP02231	-	sp|O44400|F37C4_CAEEL%%Protein F37C4.5 OS=Caenorhabditis elegans GN=F37C4.5 PE=1 SV=3%%3.8e-296	-	-	-		0	1	0	4	0	0	0	0	0	0	0	0	0	0	0	0	0	0
	GS_19474	-	-	Y	-	Y		-	-	-	F13H8.1b%CE37349 WBGene00017434 status:Partially_confirmed UniProt:Q65ZJ8_CAEEL protein_id:AAU20847.1%HMM_hit%2.4e-33	-	-	-		0	1	0	1	0	0	0	0	0	0	0	0	0	0	0	0	0	0
	GS_19696	-	-	Y	-	Y		K02932-large subunit ribosomal protein L5e	IPR005484-Ribosomal protein L18/L5 IPR005485-Ribosomal protein L5, eukaryotic/archaeal	Biological Process: translation (GO:0006412), Cellular Component: intracellular (GO:0005622), Cellular Component: ribosome (GO:0005840), Molecular Function: 5S rRNA binding (GO:0008097), Molecular Function: structural constituent of ribosome (GO:0003735)	bmy:Bm1_32050 60S ribosomal protein L5; K02932 large subunit ribosomal protein L5e%296%80.0675675675676%1e-137	-	-	-		0	1	0	9	0	0	0	0	0	0	0	0	0	0	0	0	0	0
	GS_19796	-	-	Y	-	Y		K02957-small subunit ribosomal protein S15Ae	IPR000630-Ribosomal protein S8	Biological Process: translation (GO:0006412), Cellular Component: intracellular (GO:0005622), Cellular Component: ribosome (GO:0005840), Molecular Function: structural constituent of ribosome (GO:0003735)	bmy:Bm1_48545 40S ribosomal protein S15a%128%98.4375%1e-68	-	-	-		0	1	0	6	0	0	0	0	0	0	0	0	0	0	0	0	0	0
	GS_19921	-	-	Y	-	Y		-	-	-	F46H5.7b%CE31170 WBGene00018522 status:Partially_confirmed UniProt:Q8MQ42_CAEEL protein_id:AAM69116.1%HMM_hit%2e-99	-	-	-		0	1	0	9	0	0	0	0	0	0	0	0	0	0	0	0	0	0
	GS_19928	-	-	Y	-	Y		K14753-guanine nucleotide-binding protein subunit beta-2-like 1 protein	IPR015943-WD40/YVTN repeat-like-containing domain IPR019781-WD40 repeat, subgroup IPR020472-G-protein beta WD-40 repeat IPR017986-WD40-repeat-containing domain IPR019775-WD40 repeat, conserved site IPR019782-WD40 repeat 2 IPR011046-WD40 repeat-like-containing domain IPR001680-WD40 repeat	Molecular Function: protein binding (GO:0005515)	Channels and Transporters%gnl|TC-DB|O00628%3%Primary active transporters%3.A.%P-P-bond-hydrolysis-driven transporters%3.A.2%" H+- or Na+-translocating F-type, V-type and A-type ATPase (F-ATPase) Superfamily."%3.A.20.1.1%" H+- or Na+-translocating F-type, V-type and A-type ATPase (F-ATPase) Superfamily.; Peroxisomal Protein Importer (PPI) Family."%Peroxisomal targeting signal 2 receptor OS=Homo sa…	-	-	Y		0	1	0	4	0	0	0	0	0	0	0	0	0	0	0	0	0	0
	GS_20274	-	-	Y	-	Y		-	IPR011990-Tetratricopeptide-like helical IPR001440-Tetratricopeptide TPR-1 IPR019734-Tetratricopeptide repeat IPR013026-Tetratricopeptide repeat-containing	Molecular Function: binding (GO:0005488), Molecular Function: protein binding (GO:0005515)	Channels and Transporters%gnl|TC-DB|Q9MUK5%3%Primary active transporters%3.A.%P-P-bond-hydrolysis-driven transporters%3.A.9% Chloroplast Envelope Protein Translocase (CEPT or Tic-Toc) Family.%3.A.9.1.1% Chloroplast Envelope Protein Translocase (CEPT or Tic-Toc) Family.%Toc64 - Pisum sativum (Garden pea).%99%41.41414141%3.00E-14	-	-	-		0	1	0	1	0	0	0	0	0	0	0	0	0	0	0	0	0	0
	GS_20320	-	-	Y	-	Y		K02951-small subunit ribosomal protein S12e	IPR000530-Ribosomal protein S12e IPR004038-Ribosomal protein L7Ae/L30e/S12e/Gadd45	Biological Process: translation (GO:0006412), Cellular Component: intracellular (GO:0005622), Cellular Component: ribosome (GO:0005840), Molecular Function: structural constituent of ribosome (GO:0003735)	bmy:Bm1_55385 40S ribosomal protein S12; K02951 small subunit ribosomal protein S12e%123%86.9918699186992%9e-58	-	-	-		0	1	0	2	0	0	0	0	0	0	0	0	0	0	0	0	0	0
	GS_21116	-	-	Y	-	Y		-	IPR019002-Ribosome biogenesis protein Nop16	-	sp|Q9CPT5|NOP16_MOUSE%%Nucleolar protein 16 OS=Mus musculus GN=Nop16 PE=2 SV=1%%1.6e-24	-	-	-		0	1	0	2	0	0	0	0	0	0	0	0	0	0	0	0	0	0
	GS_23022	-	-	Y	-	Y		K00615-transketolase	IPR005476-Transketolase, C-terminal IPR005475-Transketolase-like, pyrimidine-binding domain IPR020826-Transketolase binding site IPR015941-Transketolase-like, C-terminal IPR005474-Transketolase, N-terminal IPR009014-Transketolase, C-terminal/Pyruvate-ferredoxin oxidoreductase, domain II	Biological Process: metabolic process (GO:0008152), Molecular Function: catalytic activity (GO:0003824)	sp|C1DAW8|DXS_LARHH%%1-deoxy-D-xylulose-5-phosphate synthase OS=Laribacter hongkongensis (strain HLHK9) GN=dxs PE=3 SV=1%%3e-198	-	-	Y		0	1	0	1	0	0	0	0	0	0	0	0	0	0	0	0	0	0
	GS_23250	-	-	Y	-	Y		K00627-pyruvate dehydrogenase E2 component (dihydrolipoamide acetyltransferase)	IPR004167-E3 binding IPR023213-Chloramphenicol acetyltransferase-like domain IPR011053-Single hybrid motif IPR001078-2-oxoacid dehydrogenase acyltransferase, catalytic domain IPR000089-Biotin/lipoyl attachment	Biological Process: metabolic process (GO:0008152), Molecular Function: acyltransferase activity (GO:0008415)	sp|P36413|ODP2_DICDI%%Dihydrolipoyllysine-residue acetyltransferase component of pyruvate dehydrogenase complex, mitochondrial OS=Dictyostelium discoideum GN=pdhC PE=1 SV=2%%3.4e-205	-	-	-		0	1	0	19	0	0	0	0	0	0	0	0	0	0	0	0	0	0
	GS_23357	-	-	Y	-	Y		-	IPR013320-Concanavalin A-like lectin/glucanase, subgroup IPR008985-Concanavalin A-like lectin/glucanase IPR001079-Galectin, carbohydrate recognition domain	Molecular Function: sugar binding (GO:0005529)	Channels and Transporters%gnl|TC-DB|P97840%9%Incompletely characterized transport systems%9.B.%Putative transport proteins%9.B.9% Urate Transporter (UAT) Family.%9.B.9.1.1% Urate Transporter (UAT) Family.%GALECTIN-9 (36 KDA BETA-GALACTOSIDE BINDING LECTIN) (URATE TRANSPORTER/CHANNEL) (UAT) - Rattus norvegicus (Rat).%178%32.58426966%3.00E-19	-	-	Y		0	1	0	14	0	0	0	0	0	0	0	0	0	0	0	0	0	0
	GS_23507	-	-	Y	-	Y		K09498-T-complex protein 1 subunit zeta	IPR002194-Chaperonin TCP-1, conserved site IPR002423-Chaperonin Cpn60/TCP-1 IPR017998-Chaperone, tailless complex polypeptide 1 IPR012722-T-complex protein 1, zeta subunit	Biological Process: cellular protein metabolic process (GO:0044267), Biological Process: protein folding (GO:0006457), Molecular Function: ATP binding (GO:0005524), Molecular Function: unfolded protein binding (GO:0051082)	bmy:Bm1_00545 T-complex protein 1, zeta subunit; K09498 T-complex protein 1 subunit zeta%558%80.1075268817204%0.0	-	-	Y		0	1	0	2	0	0	0	0	0	0	0	0	0	0	0	0	0	0
	GS_23921	-	-	Y	-	Y		K02987-small subunit ribosomal protein S4e	IPR013843-Ribosomal protein S4e, N-terminal IPR018199-Ribosomal protein S4e, N-terminal, conserved site IPR002942-RNA-binding S4 IPR005824-KOW IPR013845-Ribosomal protein S4e, central IPR000876-Ribosomal protein S4e	Biological Process: translation (GO:0006412), Cellular Component: intracellular (GO:0005622), Cellular Component: ribosome (GO:0005840), Molecular Function: RNA binding (GO:0003723), Molecular Function: structural constituent of ribosome (GO:0003735)	bmy:Bm1_06615 40S ribosomal protein S4; K02987 small subunit ribosomal protein S4e%263%90.1140684410646%1e-139	-	-	-		0	1	0	9	0	0	0	0	0	0	0	0	0	0	0	0	0	0
	GS_23948	-	-	Y	-	Y		K12382-saposin	IPR008139-Saposin B IPR007856-Saposin-like type B, 1 IPR011001-Saposin-like	Biological Process: lipid metabolic process (GO:0006629)	bmy:Bm1_37185 Saposin-like type B, region 1 family protein; K12382 saposin%209%52.6315789473684%2e-61	-	Y	-		0	1	0	2	0	0	0	0	0	0	0	0	0	0	0	0	0	0
	GS_07731	-	-	Y	-	Y		-	IPR004843-Metallo-dependent phosphatase	Molecular Function: hydrolase activity (GO:0016787)	sp|Q641Z7|ASM3A_RAT%%Acid sphingomyelinase-like phosphodiesterase 3a OS=Rattus norvegicus GN=Smpdl3a PE=2 SV=1%%2.8e-133	-	-	Y		0	1	0	2	0	0	0	0	0	0	0	0	0	0	0	0	0	0
	GS_03010	-	-	Y	-	Y		K08762-diazepam-binding inhibitor (GABA receptor modulator, acyl-CoA-binding protein)	IPR022408-Acyl-CoA-binding protein, ACBP, conserved site IPR000582-Acyl-CoA-binding protein, ACBP IPR014352-FERM/acyl-CoA-binding protein, 3-helical bundle	Molecular Function: binding (GO:0005488), Molecular Function: fatty-acyl-CoA binding (GO:0000062)	hmg:100210150 similar to endozepine; K08762 diazepam-binding inhibitor (GABA receptor modulator, acyl-CoA-binding protein)%83%63.855421686747%4e-24	-	-	-		0	16	0	7	0	0	0	0	0	0	0	0	0	0	0	0	0	0
	GS_07683	-	-	Y	-	Y		-	IPR001464-Annexin IPR018252-Annexin repeat, conserved site IPR018502-Annexin repeat	Molecular Function: calcium ion binding (GO:0005509), Molecular Function: calcium-dependent phospholipid binding (GO:0005544)	Channels and Transporters%gnl|TC-DB|P08133%1%Channel/pores%1.A.%alpha-type channels%1.A.3% Voltage-gated Ion Channel (VIC) Superfamily .%1.A.31.1.2%" Annexin (Annexin) Family.; Ryanodine-Inositol 1,4,5-triphosphate Receptor Ca2+ Channel (RIR-CaC) Family."%Annexin A6 (Annexin VI) (Lipocortin VI) (P68) (P70) (Protein III) (Chromobindin 20) (67 kDa calelectrin) (Calphobindin-II) (CPB-II) - Homo sapi…	-	-	Y		0	6	0	15	0	0	0	0	0	0	0	0	0	0	0	0	0	0
	GS_21792	-	-	Y	-	Y		-	IPR013320-Concanavalin A-like lectin/glucanase, subgroup IPR008985-Concanavalin A-like lectin/glucanase IPR001079-Galectin, carbohydrate recognition domain	Molecular Function: sugar binding (GO:0005529)	Channels and Transporters%gnl|TC-DB|P97840%9%Incompletely characterized transport systems%9.B.%Putative transport proteins%9.B.9% Urate Transporter (UAT) Family.%9.B.9.1.1% Urate Transporter (UAT) Family.%GALECTIN-9 (36 KDA BETA-GALACTOSIDE BINDING LECTIN) (URATE TRANSPORTER/CHANNEL) (UAT) - Rattus norvegicus (Rat).%344%24.12790698%1.00E-21	-	-	Y		0	10	0	31	0	0	0	0	0	0	0	0	0	0	0	0	0	0
	GS_12864	-	-	Y	-	Y		K00940-nucleoside-diphosphate kinase	IPR023005-Nucleoside diphosphate kinase, active site IPR001564-Nucleoside diphosphate kinase	Biological Process: CTP biosynthetic process (GO:0006241), Biological Process: GTP biosynthetic process (GO:0006183), Biological Process: nucleoside diphosphate phosphorylation (GO:0006165), Biological Process: UTP biosynthetic process (GO:0006228), Molecular Function: ATP binding (GO:0005524), Molecular Function: nucleoside diphosphate kinase activity (GO:0004550)	bmy:Bm1_50135 Nucleoside diphosphate kinase; K00940 nucleoside-diphosphate kinase [EC:2.7.4.6]%160%73.125%1e-65	Y	-	-		0	2	0	2	0	0	0	0	0	0	0	0	0	0	0	0	0	0
	GS_00520	-	-	Y	-	Y		-	-	-	Hypothetical protein	-	Y	-		0	1	0	1	0	0	0	0	0	0	0	0	0	0	0	0	0	0
	GS_21040	-	-	Y	-	Y		K04078-chaperonin GroES	IPR020818-Chaperonin Cpn10 IPR018369-Chaperonin Cpn10, conserved site IPR011032-GroES-like	Biological Process: protein folding (GO:0006457), Cellular Component: cytoplasm (GO:0005737), Molecular Function: ATP binding (GO:0005524)	bmy:Bm1_56470 chaperonin-10 kDa; K04078 chaperonin GroES%111%66.6666666666667%3e-38	-	-	-		0	2	0	1	0	0	0	0	0	0	0	0	0	0	0	0	0	0
	GS_14497	-	-	Y	-	-		K01255-leucyl aminopeptidase	IPR011356-Peptidase M17 IPR000819-Peptidase M17, leucyl aminopeptidase, C-terminal	Biological Process: protein metabolic process (GO:0019538), Biological Process: proteolysis (GO:0006508), Cellular Component: cytoplasm (GO:0005737), Cellular Component: intracellular (GO:0005622), Molecular Function: aminopeptidase activity (GO:0004177), Molecular Function: manganese ion binding (GO:0030145), Molecular Function: metalloexopeptidase activity (GO:0008235)	Peptidase%MER165606 - leucine aminopeptidase {{Fasciola}-type} (Brugia malayi) [M17.011]#M17#%505%60.3960396039604%1e-180	-	Y	-		0	2	0	0	0	0	0	0	0	0	0	0	0	0	0	0	0	0
	GS_05016	-	-	Y	-	-		K02738-20S proteasome subunit beta 1	IPR016050-Proteasome, beta-type subunit, conserved site IPR023333-Proteasome B-type subunit IPR001353-Proteasome, subunit alpha/beta IPR000243-Peptidase T1A, proteasome beta-subunit	Biological Process: proteolysis involved in cellular protein catabolic process (GO:0051603), Cellular Component: proteasome core complex (GO:0005839), Molecular Function: endopeptidase activity (GO:0004175), Molecular Function: threonine-type endopeptidase activity (GO:0004298)	Peptidase%MER168279 - proteasome catalytic subunit 1 (Caenorhabditis briggsae) [T01.010]#T01A#%184%74.4565217391304%8e-79	-	-	Y		0	1	0	0	0	0	0	0	0	0	0	0	0	0	0	0	0	0
	GS_13361	-	-	Y	-	-		K01507-inorganic pyrophosphatase	IPR008162-Inorganic pyrophosphatase	Biological Process: phosphate metabolic process (GO:0006796), Cellular Component: cytoplasm (GO:0005737), Molecular Function: inorganic diphosphatase activity (GO:0004427), Molecular Function: magnesium ion binding (GO:0000287)	cbr:CBG03439 Cbr-pyp-1; C. briggsae CBR-PYP-1 protein; K01507 inorganic pyrophosphatase [EC:3.6.1.1]%302%58.2781456953642%4e-95	-	Y	Y		0	4	0	0	0	0	0	0	0	0	0	0	0	0	0	0	0	0
	GS_05894	-	-	Y	-	-		K05759-profilin	IPR002097-Profilin/allergen IPR005455-Profilin, plant	Biological Process: actin cytoskeleton organization (GO:0030036), Biological Process: cytoskeleton organization (GO:0007010), Cellular Component: actin cytoskeleton (GO:0015629), Molecular Function: actin binding (GO:0003779)	bmy:Bm1_21620 Profilin family protein; K05759 profilin%132%81.8181818181818%7e-58	-	-	-		0	3	0	0	0	0	0	0	0	0	0	0	0	0	0	0	0	0
	GS_22623	-	-	Y	-	-		K11205-glutamate--cysteine ligase regulatory subunit	IPR023210-NADP-dependent oxidoreductase domain	-	sp|Q95JH6|AK1C1_MACFU%%Aldo-keto reductase family 1 member C1 homolog OS=Macaca fuscata fuscata GN=AKR1C1 PE=2 SV=1%%3.7e-98	-	-	Y		0	3	0	0	0	0	0	0	0	0	0	0	0	0	0	0	0	0
	GS_01672	-	-	Y	-	-		-	IPR001369-Purine phosphorylase, family 2	Molecular Function: transferase activity, transferring pentosyl groups (GO:0016763)	bmy:Bm1_37405 purine nucleoside phosphorylase I, inosine and guanosine-specific family protein; K03783 purine-nucleoside phosphorylase [EC:2.4.2.1]%96%54.1666666666667%2e-27	-	-	-		0	2	0	0	0	0	0	0	0	0	0	0	0	0	0	0	0	0
	GS_04509	-	-	Y	-	-		K00772-5'-methylthioadenosine phosphorylase	IPR001369-Purine phosphorylase, family 2 IPR000845-Nucleoside phosphorylase domain	Biological Process: nucleoside metabolic process (GO:0009116), Molecular Function: catalytic activity (GO:0003824), Molecular Function: transferase activity, transferring pentosyl groups (GO:0016763)	bmy:Bm1_42810 MTAP; K00772 5'-methylthioadenosine phosphorylase [EC:2.4.2.28]%286%70.2797202797203%1e-117	-	-	Y		0	2	0	0	0	0	0	0	0	0	0	0	0	0	0	0	0	0
	GS_06015	-	-	Y	-	-		K11279-nucleosome assembly protein 1-like 1	IPR002164-Nucleosome assembly protein (NAP)	Biological Process: nucleosome assembly (GO:0006334), Cellular Component: nucleus (GO:0005634)	bmy:Bm1_27810 nucleosome assembly protein 1; K11279 nucleosome assembly protein 1-like 1%264%69.6969696969697%1e-104	-	-	-		0	2	0	0	0	0	0	0	0	0	0	0	0	0	0	0	0	0
	GS_12747	-	-	Y	-	-		-	IPR000182-GCN5-related N-acetyltransferase (GNAT) domain IPR016181-Acyl-CoA N-acyltransferase	Biological Process: metabolic process (GO:0008152), Molecular Function: N-acetyltransferase activity (GO:0008080)	sp|Q09318|YQY2_CAEEL%%Uncharacterized protein F36G3.2 OS=Caenorhabditis elegans GN=F36G3.2 PE=2 SV=1%%2.5e-94	-	-	Y		0	2	0	0	0	0	0	0	0	0	0	0	0	0	0	0	0	0
	GS_17513	-	-	Y	-	-		K00868-pyridoxine kinase	IPR004625-Pyridoxal phosphate (active vitamin B6) biosynthesis, pyridoxal kinase IPR011611-Carbohydrate/purine kinase	Biological Process: pyridoxal 5'-phosphate salvage (GO:0009443), Molecular Function: pyridoxal kinase activity (GO:0008478)	sp|O01824|PDXK_CAEEL%%Putative pyridoxal kinase OS=Caenorhabditis elegans GN=F57C9.1 PE=2 SV=2%%4.7e-93	-	-	Y		0	2	0	0	0	0	0	0	0	0	0	0	0	0	0	0	0	0
	GS_20159	-	-	Y	-	-		K01488-adenosine deaminase	IPR001365-Adenosine/AMP deaminase	Biological Process: purine ribonucleoside monophosphate biosynthetic process (GO:0009168), Molecular Function: deaminase activity (GO:0019239)	sp|Q54KF3|ADA_DICDI%%Probable adenosine deaminase OS=Dictyostelium discoideum GN=ada PE=3 SV=1%%9.4e-115	-	-	-		0	2	0	0	0	0	0	0	0	0	0	0	0	0	0	0	0	0
	GS_00309	-	-	Y	-	-		-	IPR004226-Tubulin binding cofactor A	Biological Process: tubulin complex assembly (GO:0007021), Cellular Component: microtubule (GO:0005874), Molecular Function: unfolded protein binding (GO:0051082)	bmy:Bm1_00990 Tubulin binding cofactor A family protein%108%48.1481481481481%7e-24	-	-	-		0	1	0	0	0	0	0	0	0	0	0	0	0	0	0	0	0	0
	GS_01716	-	-	Y	-	-		K02979-small subunit ribosomal protein S28e	IPR000289-Ribosomal protein S28e IPR016027-Nucleic acid-binding, OB-fold-like IPR012340-Nucleic acid-binding, OB-fold	Biological Process: translation (GO:0006412), Cellular Component: intracellular (GO:0005622), Cellular Component: ribosome (GO:0005840), Molecular Function: structural constituent of ribosome (GO:0003735)	bmy:Bm1_18535 40S ribosomal protein S28; K02979 small subunit ribosomal protein S28e%66%96.969696969697%5e-29	-	-	-		0	1	0	0	0	0	0	0	0	0	0	0	0	0	0	0	0	0
	GS_02416	-	-	Y	-	-		-	IPR012315-Klarsicht/ANC-1/syne-1 homology	Cellular Component: integral to membrane (GO:0016021), Molecular Function: actin binding (GO:0003779)	bmy:Bm1_06130 Nuclear anchorage protein 1%359%57.6601671309192%1e-108	Y	-	-		0	1	0	0	0	0	0	0	0	0	0	0	0	0	0	0	0	0
	GS_02881	-	-	Y	-	-		K09554-cell division cycle protein 37	IPR013874-Cdc37, Hsp90 binding IPR013855-Cdc37, N-terminal IPR013873-Cdc37, C-terminal IPR004918-Cdc37	-	bmy:Bm1_35400 Hsp90 co-chaperone Cdc37; K09554 cell division cycle protein 37%355%76.056338028169%1e-153	Y	-	-		0	1	0	0	0	0	0	0	0	0	0	0	0	0	0	0	0	0
	GS_06871	-	-	Y	-	-		K05687-protein DJ-1	IPR002818-ThiJ/PfpI IPR006287-DJ-1	-	bmy:Bm1_07685 DJ-1 family protein; K05687 protein DJ-1%183%68.8524590163934%2e-59	-	-	-		0	1	0	0	0	0	0	0	0	0	0	0	0	0	0	0	0	0
	GS_08818	-	-	Y	-	-		-	IPR000971-Globin, subset IPR009050-Globin-like IPR012292-Globin	Biological Process: oxygen transport (GO:0015671), Molecular Function: heme binding (GO:0020037), Molecular Function: iron ion binding (GO:0005506), Molecular Function: oxygen binding (GO:0019825)	cbr:CBG06867 Cbr-glb-1; C. briggsae CBR-GLB-1 protein%156%56.4102564102564%2e-51	-	-	-		0	1	0	0	0	0	0	0	0	0	0	0	0	0	0	0	0	0
	GS_09209	-	-	Y	-	-		K01681-aconitate hydratase 1	IPR018136-Aconitase family, 4Fe-4S cluster binding site IPR015932-Aconitase/3-isopropylmalate dehydratase large subunit, alpha/beta/alpha, subdomain 2 IPR001030-Aconitase/3-isopropylmalate dehydratase large subunit, alpha/beta/alpha IPR015931-Aconitase/3-isopropylmalate dehydratase large subunit, alpha/beta/alpha, subdomain 1/3 IPR015928-Aconitase/3-isopropylmalate dehydratase, swivel IPR006248-A…	Biological Process: metabolic process (GO:0008152), Biological Process: tricarboxylic acid cycle (GO:0006099), Molecular Function: 4 iron, 4 sulfur cluster binding (GO:0051539), Molecular Function: aconitate hydratase activity (GO:0003994)	bmy:Bm1_07420 aconitate hydratase, mitochondrial (EC:4.2.1.3); K01681 aconitate hydratase 1 [EC:4.2.1.3]%756%79.4973544973545%0.0	-	-	Y		0	1	0	0	0	0	0	0	0	0	0	0	0	0	0	0	0	0
	GS_11779	-	-	Y	-	-		K00036-glucose-6-phosphate 1-dehydrogenase	IPR022674-Glucose-6-phosphate dehydrogenase, NAD-binding IPR001282-Glucose-6-phosphate dehydrogenase IPR022675-Glucose-6-phosphate dehydrogenase, C-terminal IPR016040-NAD(P)-binding domain IPR019796-Glucose-6-phosphate dehydrogenase, active site	Biological Process: glucose metabolic process (GO:0006006), Biological Process: oxidation-reduction process (GO:0055114), Molecular Function: binding (GO:0005488), Molecular Function: glucose-6-phosphate dehydrogenase activity (GO:0004345), Molecular Function: NADP binding (GO:0050661)	bmy:Bm1_36755 glucose-6-phosphate dehydrogenase; K00036 glucose-6-phosphate 1-dehydrogenase [EC:1.1.1.49]%522%76.2452107279694%0.0	-	-	Y		0	1	0	0	0	0	0	0	0	0	0	0	0	0	0	0	0	0
	GS_12319	-	-	Y	-	-		K03841-fructose-1,6-bisphosphatase I	IPR000146-Fructose-1,6-bisphosphatase class 1/Sedoheputulose-1,7-bisphosphatase IPR020548-Fructose-1,6-bisphosphatase, active site	Biological Process: carbohydrate metabolic process (GO:0005975), Molecular Function: phosphoric ester hydrolase activity (GO:0042578)	bmy:Bm1_37105 fructose-1,6-bisphosphatase; K03841 fructose-1,6-bisphosphatase I [EC:3.1.3.11]%337%58.160237388724%1e-111	-	-	Y		0	1	0	0	0	0	0	0	0	0	0	0	0	0	0	0	0	0
	GS_12822	-	-	Y	-	-		-	IPR022383-Lactate/malate dehydrogenase, C-terminal IPR015955-Lactate dehydrogenase/glycoside hydrolase, family 4, C-terminal IPR001236-Lactate/malate dehydrogenase, N-terminal IPR016040-NAD(P)-binding domain IPR001252-Malate dehydrogenase, active site IPR010945-Malate dehydrogenase, type 2	Biological Process: carbohydrate metabolic process (GO:0005975), Biological Process: malate metabolic process (GO:0006108), Biological Process: oxidation-reduction process (GO:0055114), Molecular Function: binding (GO:0005488), Molecular Function: catalytic activity (GO:0003824), Molecular Function: malate dehydrogenase activity (GO:0016615), Molecular Function: oxidoreductase activity (GO:001649…	sp|B2JQD2|MDH_BURP8%%Malate dehydrogenase OS=Burkholderia phymatum (strain DSM 17167 / STM815) GN=mdh PE=3 SV=1%%4.4e-116	-	-	Y		0	1	0	0	0	0	0	0	0	0	0	0	0	0	0	0	0	0
	GS_12831	-	-	Y	-	-		K00814-alanine transaminase	IPR015421-Pyridoxal phosphate-dependent transferase, major region, subdomain 1 IPR015422-Pyridoxal phosphate-dependent transferase, major region, subdomain 2 IPR004839-Aminotransferase, class I/classII IPR015424-Pyridoxal phosphate-dependent transferase, major domain	Biological Process: biosynthetic process (GO:0009058), Molecular Function: catalytic activity (GO:0003824), Molecular Function: pyridoxal phosphate binding (GO:0030170), Molecular Function: transferase activity, transferring nitrogenous groups (GO:0016769)	sp|Q28DB5|ALAT2_XENTR%%Alanine aminotransferase 2 OS=Xenopus tropicalis GN=gpt2 PE=2 SV=1%%2.8e-131	-	-	Y		0	1	0	0	0	0	0	0	0	0	0	0	0	0	0	0	0	0
	GS_13614	-	-	Y	-	-		-	IPR001849-Pleckstrin homology domain IPR004000-Actin-like	Molecular Function: protein binding (GO:0005515)	bmy:Bm1_40305 Actin family protein%599%64.9415692821369%0.0	-	-	-		0	1	0	0	0	0	0	0	0	0	0	0	0	0	0	0	0	0
	GS_15457	-	-	Y	-	-		K02969-small subunit ribosomal protein S20e	IPR018268-Ribosomal protein S10, conserved site IPR001848-Ribosomal protein S10 IPR005729-Ribosomal protein S10, eukaryotic/archaeal	Biological Process: translation (GO:0006412), Cellular Component: intracellular (GO:0005622), Cellular Component: ribosome (GO:0005840), Cellular Component: small ribosomal subunit (GO:0015935), Molecular Function: RNA binding (GO:0003723), Molecular Function: structural constituent of ribosome (GO:0003735)	bmy:Bm1_27585 40S ribosomal protein S20 (S22); K02969 small subunit ribosomal protein S20e%119%89.0756302521009%3e-56	-	-	-		0	1	0	0	0	0	0	0	0	0	0	0	0	0	0	0	0	0
	GS_15609	-	-	Y	-	-		K05699-actinin alpha	IPR014837-EF-hand, Ca insensitive IPR002017-Spectrin repeat IPR001589-Actinin-type, actin-binding, conserved site IPR001715-Calponin homology domain IPR018249-EF-HAND 2 IPR011992-EF-hand-like domain IPR018159-Spectrin/alpha-actinin	Molecular Function: actin binding (GO:0003779), Molecular Function: calcium ion binding (GO:0005509), Molecular Function: protein binding (GO:0005515)	bmy:Bm1_51465 alpha-actinin; K05699 actinin alpha%931%83.1364124597207%0.0	-	-	-		0	1	0	0	0	0	0	0	0	0	0	0	0	0	0	0	0	0
	GS_17778	-	-	Y	-	-		-	IPR000010-Proteinase inhibitor I25, cystatin	Molecular Function: cysteine-type endopeptidase inhibitor activity (GO:0004869)	Peptidase Inhibitor%MER036534 - CPI-2a cystatin-like inhibitor {{Caenorhabditis elegans}} (Nippostrongylus brasiliensis) [I25.032]#I25B#%115%47.8260869565217%1e-30	-	Y	-		0	1	0	0	0	0	0	0	0	0	0	0	0	0	0	0	0	0
	GS_18354	-	-	Y	-	-		-	IPR013783-Immunoglobulin-like fold IPR003961-Fibronectin, type III IPR008957-Fibronectin type III domain	Molecular Function: protein binding (GO:0005515)	sp|A2ASS6|TITIN_MOUSE%%Titin OS=Mus musculus GN=Ttn PE=1 SV=1%%0	-	Y	-		0	1	0	0	0	0	0	0	0	0	0	0	0	0	0	0	0	0
	GS_21977	-	-	Y	-	-		K01069-hydroxyacylglutathione hydrolase	IPR001279-Beta-lactamase-like IPR017782-Hydroxyacylglutathione hydrolase	Molecular Function: hydrolase activity (GO:0016787), Molecular Function: hydroxyacylglutathione hydrolase activity (GO:0004416), Molecular Function: zinc ion binding (GO:0008270)	bmy:Bm1_40000 Chain A, Human Glyoxalase Ii With Cacodylate And Acetate Ions Present In The Active Site.; K01069 hydroxyacylglutathione hydrolase [EC:3.1.2.6]%198%65.1515151515152%7e-74	-	-	-		0	1	0	0	0	0	0	0	0	0	0	0	0	0	0	0	0	0
	GS_22336	-	-	Y	-	-		K12462-Rho GDP-dissociation inhibitor	IPR000406-RHO protein GDP dissociation inhibitor IPR014756-Immunoglobulin E-set	Cellular Component: cytoplasm (GO:0005737), Molecular Function: Rho GDP-dissociation inhibitor activity (GO:0005094)	bmy:Bm1_39260 Rho GDP-dissociation inhibitor 2; K12462 Rho GDP-dissociation inhibitor%192%80.7291666666667%4e-91	-	-	Y		0	1	0	0	0	0	0	0	0	0	0	0	0	0	0	0	0	0
	GS_23478	-	-	Y	-	-		K05754-actin related protein 2/3 complex, subunit 5	IPR006789-ARP2/3 complex 16kDa subunit (p16-Arc)	Biological Process: regulation of actin filament polymerization (GO:0030833), Cellular Component: cytoskeleton (GO:0005856)	bmy:Bm1_07545 ARP2/3 complex 16 kDa subunit; K05754 actin related protein 2/3 complex, subunit 5%151%74.1721854304636%8e-65	-	-	-		0	1	0	0	0	0	0	0	0	0	0	0	0	0	0	0	0	0
	GS_24232	-	-	Y	-	-		-	IPR001464-Annexin IPR018252-Annexin repeat, conserved site IPR002390-Annexin, type III IPR018502-Annexin repeat	Molecular Function: calcium ion binding (GO:0005509), Molecular Function: calcium-dependent phospholipid binding (GO:0005544), Molecular Function: phospholipase inhibitor activity (GO:0004859)	Channels and Transporters%gnl|TC-DB|P08133%1%Channel/pores%1.A.%alpha-type channels%1.A.3% Voltage-gated Ion Channel (VIC) Superfamily .%1.A.31.1.2%" Annexin (Annexin) Family.; Ryanodine-Inositol 1,4,5-triphosphate Receptor Ca2+ Channel (RIR-CaC) Family."%Annexin A6 (Annexin VI) (Lipocortin VI) (P68) (P70) (Protein III) (Chromobindin 20) (67 kDa calelectrin) (Calphobindin-II) (CPB-II) - Homo sapi…	-	-	Y		0	1	0	0	0	0	0	0	0	0	0	0	0	0	0	0	0	0
	GS_11776	-	-	Y	-	-		K04565-Cu/Zn superoxide dismutase	IPR018152-Superoxide dismutase, copper/zinc, binding site IPR001424-Superoxide dismutase, copper/zinc binding	Biological Process: oxidation-reduction process (GO:0055114), Biological Process: superoxide metabolic process (GO:0006801), Molecular Function: metal ion binding (GO:0046872)	cbr:CBG11197 Cbr-sod-1; C. briggsae CBR-SOD-1 protein; K04565 Cu/Zn superoxide dismutase [EC:1.15.1.1]%99%74.7474747474748%1e-36	-	-	-		0	2	0	0	0	0	0	0	0	0	0	0	0	0	0	0	0	0
	GS_22190	-	-	Y	-	-		-	IPR002053-Glycoside hydrolase, family 25 IPR013781-Glycoside hydrolase, subgroup, catalytic core IPR017853-Glycoside hydrolase, superfamily	Biological Process: carbohydrate metabolic process (GO:0005975), Biological Process: cell wall macromolecule catabolic process (GO:0016998), Biological Process: peptidoglycan catabolic process (GO:0009253), Molecular Function: catalytic activity (GO:0003824), Molecular Function: cation binding (GO:0043169), Molecular Function: lysozyme activity (GO:0003796)	cel:F58B3.2 lys-5; LYSozyme family member (lys-5)%186%57.5268817204301%2e-62	-	-	-		0	2	0	0	0	0	0	0	0	0	0	0	0	0	0	0	0	0
	GS_23536	-	-	Y	-	-		K00084-carbonyl reductase 3	IPR002198-Short-chain dehydrogenase/reductase SDR IPR020904-Short-chain dehydrogenase/reductase, conserved site IPR002347-Glucose/ribitol dehydrogenase IPR016040-NAD(P)-binding domain	Biological Process: metabolic process (GO:0008152), Biological Process: oxidation-reduction process (GO:0055114), Molecular Function: binding (GO:0005488), Molecular Function: oxidoreductase activity (GO:0016491)	bmy:Bm1_44405 oxidoreductase, short chain dehydrogenase/reductase family protein%277%71.4801444043321%1e-115	Y	-	Y		0	2	0	0	0	0	0	0	0	0	0	0	0	0	0	0	0	0
	GS_14352	-	-	-	Y	Y		K13289-cathepsin A (carboxypeptidase C)	IPR018202-Peptidase S10, serine carboxypeptidase, active site IPR001563-Peptidase S10, serine carboxypeptidase	Biological Process: proteolysis (GO:0006508), Molecular Function: serine-type carboxypeptidase activity (GO:0004185)	Peptidase%MER138084 - serine carboxypeptidase A (Caenorhabditis briggsae) [S10.002]#S10#%450%72%0.0	-	Y	-		0	0	1	1	0	0	0	0	0	0	0	0	0	0	0	0	0	0
	GS_16418	-	-	-	Y	Y		-	IPR002049-EGF-like, laminin IPR012679-Laminin G, subdomain 1 IPR009030-Growth factor, receptor IPR001791-Laminin G domain IPR023415-Low-density lipoprotein (LDL) receptor class A, conserved site IPR013151-Immunoglobulin IPR013783-Immunoglobulin-like fold IPR013320-Concanavalin A-like lectin/glucanase, subgroup IPR006210-Epidermal growth factor-like IPR013032-EGF-like region, conserved site IPR018…	Biological Process: cell adhesion (GO:0007155), Cellular Component: extracellular matrix (GO:0031012), Molecular Function: protein binding (GO:0005515)	Channels and Transporters%gnl|TC-DB|A2ARV4%9%Incompletely characterized transport systems%9.B.%Putative transport proteins%9.B.8% Canalicular Bile Acid Transporter (C-BAT) Family.%9.B.87.1.1% Canalicular Bile Acid Transporter (C-BAT) Family.; Selenoprotein P Receptor (SelP-receptor) Family.%Low-density lipoprotein receptor-related protein 2 - Mus musculus (Mouse).%124%36.29032258%5.00E-18	-	-	-		0	0	1	15	0	0	0	0	0	0	0	0	0	0	0	0	0	0
	GS_18128	-	-	-	Y	Y		-	IPR001791-Laminin G domain IPR013320-Concanavalin A-like lectin/glucanase, subgroup IPR006210-Epidermal growth factor-like IPR013032-EGF-like region, conserved site IPR008985-Concanavalin A-like lectin/glucanase IPR012680-Laminin G, subdomain 2 IPR000742-Epidermal growth factor-like, type 3	Molecular Function: protein binding (GO:0005515)	cbr:CBG04100 Cbr-itx-1; C. briggsae CBR-ITX-1 protein%690%25.0724637681159%3e-55	-	-	Y		0	0	1	6	0	0	0	0	0	0	0	0	0	0	0	0	0	0
	GS_05249	-	-	-	Y	Y		-	IPR001017-Dehydrogenase, E1 component	Biological Process: metabolic process (GO:0008152), Molecular Function: oxidoreductase activity, acting on the aldehyde or oxo group of donors, disulfide as acceptor (GO:0016624)	xtr:549826 pdha1, pdha, pdhce1a, phe1a; pyruvate dehydrogenase (lipoamide) alpha 1 (EC:1.2.4.1); K00161 pyruvate dehydrogenase E1 component subunit alpha [EC:1.2.4.1]%339%47.787610619469%3e-87	-	-	Y		0	0	2	4	0	0	0	0	0	0	0	0	0	0	0	0	0	0
	GS_10040	-	-	-	Y	Y		K08074-ADP-dependent glucokinase	IPR007666-ADP-specific phosphofructokinase/glucokinase	Biological Process: carbohydrate metabolic process (GO:0005975), Molecular Function: phosphotransferase activity, alcohol group as acceptor (GO:0016773)	bmy:Bm1_43195 ADP-specific Phosphofructokinase/Glucokinase conserved region family protein; K08074 ADP-dependent glucokinase [EC:2.7.1.147]%448%79.0178571428571%0.0	-	-	Y		0	0	1	4	0	0	0	0	0	0	0	0	0	0	0	0	0	0
	GS_04802	-	-	-	Y	Y		K03662-V-type H+-transporting ATPase S1 subunit	IPR008388-ATPase, V1 complex, subunit S1	Biological Process: ATP hydrolysis coupled proton transport (GO:0015991), Cellular Component: proton-transporting V-type ATPase, V1 domain (GO:0033180), Molecular Function: hydrogen ion transporting ATP synthase activity, rotational mechanism (GO:0046933), Molecular Function: proton-transporting ATPase activity, rotational mechanism (GO:0046961)	cel:Y55H10A.1 vha-19; Vacuolar H ATPase family member (vha-19); K03662 V-type H+-transporting ATPase S1 subunit [EC:3.6.3.14]%485%32.3711340206186%1e-52	Y	-	-		0	0	1	2	0	0	0	0	0	0	0	0	0	0	0	0	0	0
	GS_16135	-	-	-	Y	Y		K14965-protein dpy-30	IPR007858-Dpy-30 motif	-	sp|Q95JP6|KAD7_MACFA%%Putative adenylate kinase 7 (Fragment) OS=Macaca fascicularis GN=AK7 PE=2 SV=2%%6.2e-41	-	-	-		0	0	1	2	0	0	0	0	0	0	0	0	0	0	0	0	0	0
	GS_18673	-	-	-	Y	Y		K08683-3-hydroxyacyl-CoA dehydrogenase / 3-hydroxy-2-methylbutyryl-CoA dehydrogenase	IPR002198-Short-chain dehydrogenase/reductase SDR IPR020904-Short-chain dehydrogenase/reductase, conserved site IPR002347-Glucose/ribitol dehydrogenase IPR016040-NAD(P)-binding domain	Biological Process: metabolic process (GO:0008152), Biological Process: oxidation-reduction process (GO:0055114), Molecular Function: binding (GO:0005488), Molecular Function: oxidoreductase activity (GO:0016491)	cel:F01G4.2 ard-1; Alcohol/Ribitol Dehydrogenase family member (ard-1); K08683 3-hydroxyacyl-CoA dehydrogenase / 3-hydroxy-2-methylbutyryl-CoA dehydrogenase [EC:1.1.1.35 1.1.1.178]%260%71.5384615384615%1e-104	-	-	Y		0	0	1	2	0	0	0	0	0	0	0	0	0	0	0	0	0	0
	GS_00100	-	-	-	Y	Y		K12311-lysosomal alpha-mannosidase	IPR015341-Glycoside hydrolase, family 38, central domain IPR011682-Glycosyl hydrolases 38, C-terminal IPR011330-Glycoside hydrolase/deacetylase, beta/alpha-barrel IPR011013-Glycoside hydrolase-type carbohydrate-binding IPR013780-Glycosyl hydrolase, family 13, all-beta IPR000602-Glycoside hydrolase, family 38, core	Biological Process: carbohydrate metabolic process (GO:0005975), Biological Process: mannose metabolic process (GO:0006013), Molecular Function: alpha-mannosidase activity (GO:0004559), Molecular Function: carbohydrate binding (GO:0030246), Molecular Function: catalytic activity (GO:0003824), Molecular Function: cation binding (GO:0043169), Molecular Function: hydrolase activity, hydrolyzing O-gl…	cel:F55D10.1 aman-1; Alpha MANnosidase family member (aman-1); K12311 lysosomal alpha-mannosidase [EC:3.2.1.24]%951%50.8937960042061%0.0	-	Y	-		0	0	4	1	0	0	0	0	0	0	0	0	0	0	0	0	0	0
	GS_11991	-	-	-	Y	Y		-	-	-	Hypothetical protein	-	-	-		0	0	1	1	0	0	0	0	0	0	0	0	0	0	0	0	0	0
	GS_13476	-	-	-	Y	Y		-	IPR001715-Calponin homology domain IPR003096-Smooth muscle protein/calponin	Molecular Function: protein binding (GO:0005515)	cbr:CBG12084 Cbr-cpn-3; C. briggsae CBR-CPN-3 protein%140%80%4e-58	-	-	-		0	0	14	1	0	0	0	0	0	0	0	0	0	0	0	0	0	0
	GS_15627	-	-	-	Y	Y		K01802-peptidylprolyl isomerase	IPR020892-Peptidyl-prolyl cis-trans isomerase, cyclophilin-type, conserved site IPR002130-Peptidyl-prolyl cis-trans isomerase, cyclophilin-type IPR015891-Cyclophilin-like	Biological Process: protein folding (GO:0006457), Molecular Function: peptidyl-prolyl cis-trans isomerase activity (GO:0003755)	cbr:CBG18577 Cbr-cyn-3; C. briggsae CBR-CYN-3 protein; K01802 peptidylprolyl isomerase [EC:5.2.1.8]%171%86.5497076023392%4e-83	-	-	-		0	0	1	1	0	0	0	0	0	0	0	0	0	0	0	0	0	0
	GS_02945	-	-	-	Y	-		-	IPR000215-Protease inhibitor I4, serpin IPR023796-Serpin domain	Molecular Function: serine-type endopeptidase inhibitor activity (GO:0004867)	bmy:Bm1_44855 Serpin protein 6%189%42.3280423280423%2e-38	-	-	Y		0	0	11	0	0	0	0	0	0	0	0	0	0	0	0	0	0	0
	GS_13414	-	-	-	Y	-		-	-	-	T02E9.2b%CE38539 WBGene00001716 locus:grl-7 status:Confirmed UniProt:Q52GX6_CAEEL protein_id:CAI91177.1%HMM_hit%4.3e-47	Y	-	-		0	0	4	0	0	0	0	0	0	0	0	0	0	0	0	0	0	0
	GS_22769	-	-	-	Y	-		-	IPR000971-Globin, subset IPR009050-Globin-like IPR012292-Globin	Biological Process: oxygen transport (GO:0015671), Molecular Function: heme binding (GO:0020037), Molecular Function: iron ion binding (GO:0005506), Molecular Function: oxygen binding (GO:0019825)	cbr:CBG06867 Cbr-glb-1; C. briggsae CBR-GLB-1 protein%123%48.780487804878%4e-28	-	-	-		0	0	4	0	0	0	0	0	0	0	0	0	0	0	0	0	0	0
	GS_03470	-	-	-	Y	-		K12382-saposin	IPR008139-Saposin B IPR011001-Saposin-like	-	%gi|17864128|ref|NP_524597.1|%%Saposin-related, isoform A [Drosophila melanogaster]%%3.8e-124	-	Y	-		0	0	3	0	0	0	0	0	0	0	0	0	0	0	0	0	0	0
	GS_14215	-	-	-	Y	-		K10758-thiol oxidase	IPR017936-Thioredoxin-like IPR012335-Thioredoxin fold IPR006863-Erv1/Alr IPR017905-ERV/ALR sulphydryl oxidase IPR012336-Thioredoxin-like fold IPR013766-Thioredoxin domain	Biological Process: cell redox homeostasis (GO:0045454), Biological Process: oxidation-reduction process (GO:0055114), Molecular Function: thiol oxidase activity (GO:0016972)	sp|Q6ZRP7|QSOX2_HUMAN%%Sulfhydryl oxidase 2 OS=Homo sapiens GN=QSOX2 PE=1 SV=3%%8.5e-281	Y	-	-		0	0	3	0	0	0	0	0	0	0	0	0	0	0	0	0	0	0
	GS_03241	-	-	-	Y	-		-	IPR013783-Immunoglobulin-like fold IPR003961-Fibronectin, type III IPR007110-Immunoglobulin-like IPR008957-Fibronectin type III domain	Molecular Function: protein binding (GO:0005515)	sp|A2AAJ9|OBSCN_MOUSE%%Obscurin OS=Mus musculus GN=Obscn PE=2 SV=2%%0	-	-	Y		0	0	2	0	0	0	0	0	0	0	0	0	0	0	0	0	0	0
	GS_04638	-	-	-	Y	-		K01285-lysosomal Pro-X carboxypeptidase	IPR008758-Peptidase S28	Biological Process: proteolysis (GO:0006508), Molecular Function: serine-type peptidase activity (GO:0008236)	Peptidase%MER123704 - family S28 unassigned peptidases (Caenorhabditis briggsae) [S28.UPW]#S28#%472%58.0508474576271%1e-166	-	-	-		0	0	2	0	0	0	0	0	0	0	0	0	0	0	0	0	0	0
	GS_09503	-	-	-	Y	-		-	-	-	hmg:100206904 similar to Hepatitis A virus cellular receptor 1%140%25.7142857142857%6e-07	-	Y	-		0	0	2	0	0	0	0	0	0	0	0	0	0	0	0	0	0	0
	GS_11053	-	-	-	Y	-		-	IPR001534-Transthyretin-like	Cellular Component: extracellular space (GO:0005615)	sp|Q03575|TTR5_CAEEL%%Transthyretin-like protein 5 OS=Caenorhabditis elegans GN=ttr-5 PE=2 SV=1%%6.4e-59	-	Y	-		0	0	2	0	0	0	0	0	0	0	0	0	0	0	0	0	0	0
	GS_15023	-	-	-	Y	-		K00065-2-deoxy-D-gluconate 3-dehydrogenase	IPR002198-Short-chain dehydrogenase/reductase SDR IPR020904-Short-chain dehydrogenase/reductase, conserved site IPR002347-Glucose/ribitol dehydrogenase IPR016040-NAD(P)-binding domain	Biological Process: metabolic process (GO:0008152), Biological Process: oxidation-reduction process (GO:0055114), Molecular Function: binding (GO:0005488), Molecular Function: oxidoreductase activity (GO:0016491)	cel:R05D8.10 dhs-15; DeHydrogenases, Short chain family member (dhs-15)%282%45.3900709219858%6e-56	-	-	-		0	0	2	0	0	0	0	0	0	0	0	0	0	0	0	0	0	0
	GS_16653	-	-	-	Y	-		-	-	-	cel:R06C7.4 cpg-3; Chondroitin ProteoGlycan family member (cpg-3)%110%45.4545454545455%2e-17	-	-	Y		0	0	2	0	0	0	0	0	0	0	0	0	0	0	0	0	0	0
	GS_04087	-	-	-	Y	-		-	IPR016024-Armadillo-type fold IPR011989-Armadillo-like helical IPR002652-Importin-alpha-like, importin-beta-binding domain IPR000225-Armadillo	Biological Process: intracellular protein transport (GO:0006886), Biological Process: protein import into nucleus (GO:0006606), Cellular Component: cytoplasm (GO:0005737), Cellular Component: nuclear pore (GO:0005643), Cellular Component: nucleus (GO:0005634), Molecular Function: binding (GO:0005488), Molecular Function: protein binding (GO:0005515), Molecular Function: protein transporter activi…	bmy:Bm1_32450 Importin alpha-3 subunit%560%81.6071428571429%0.0	-	-	Y		0	0	1	0	0	0	0	0	0	0	0	0	0	0	0	0	0	0
	GS_07276	-	-	-	Y	-		K05759-profilin	IPR002097-Profilin/allergen IPR005455-Profilin, plant	Biological Process: actin cytoskeleton organization (GO:0030036), Biological Process: cytoskeleton organization (GO:0007010), Cellular Component: actin cytoskeleton (GO:0015629), Molecular Function: actin binding (GO:0003779)	cel:K03E6.6 pfn-3; ProFiliN family member (pfn-3); K05759 profilin%126%73.015873015873%5e-50	-	-	-		0	0	1	0	0	0	0	0	0	0	0	0	0	0	0	0	0	0
	GS_10438	-	-	-	Y	-		K00626-acetyl-CoA C-acetyltransferase	IPR020616-Thiolase, N-terminal IPR020615-Thiolase, acyl-enzyme intermediate active site IPR016039-Thiolase-like IPR002155-Thiolase IPR020613-Thiolase, conserved site IPR020617-Thiolase, C-terminal IPR016038-Thiolase-like, subgroup	Biological Process: metabolic process (GO:0008152), Molecular Function: catalytic activity (GO:0003824), Molecular Function: transferase activity, transferring acyl groups other than amino-acyl groups (GO:0016747)	cel:T02G5.8 kat-1; 3-Ketoacyl-coA Thiolase family member (kat-1); K00626 acetyl-CoA C-acetyltransferase [EC:2.3.1.9]%382%59.6858638743455%1e-133	-	-	Y		0	0	1	0	0	0	0	0	0	0	0	0	0	0	0	0	0	0
	GS_11176	-	-	-	Y	-		K12158-ubiquitin-like protein Nedd8	IPR000626-Ubiquitin IPR019955-Ubiquitin supergroup	Molecular Function: protein binding (GO:0005515)	bmy:Bm1_48970 polyprotein; K12158 ubiquitin-like protein Nedd8%81%93.8271604938272%2e-34	-	-	-		0	0	1	0	0	0	0	0	0	0	0	0	0	0	0	0	0	0
	GS_22968	-	-	-	Y	-		K01809-mannose-6-phosphate isomerase	IPR011051-Cupin, RmlC-type IPR016305-Mannose-6-phosphate isomerase IPR018050-Phosphomannose isomerase, type I, conserved site IPR014710-RmlC-like jelly roll fold IPR001250-Mannose-6-phosphate isomerase, type I	Biological Process: carbohydrate metabolic process (GO:0005975), Molecular Function: mannose-6-phosphate isomerase activity (GO:0004476), Molecular Function: zinc ion binding (GO:0008270)	bmy:Bm1_32455 mannose-6-phosphate isomerase, class I family protein; K01809 mannose-6-phosphate isomerase [EC:5.3.1.8]%327%58.1039755351682%1e-107	-	Y	-		0	0	1	0	0	0	0	0	0	0	0	0	0	0	0	0	0	0
	GS_12601	-	-	-	Y	-		-	IPR003677-Domain of unknown function DUF148	-	bmy:Bm1_42870 Brugia malayi antigen%144%39.5833333333333%4e-21	-	Y	-		0	0	3	0	0	0	0	0	0	0	0	0	0	0	0	0	0	0
	GS_00980	-	-	-	Y	-		K01365-cathepsin L	IPR013201-Proteinase inhibitor I29, cathepsin propeptide IPR000169-Peptidase, cysteine peptidase active site IPR013128-Peptidase C1A, papain IPR000668-Peptidase C1A, papain C-terminal	Biological Process: proteolysis (GO:0006508), Molecular Function: cysteine-type endopeptidase activity (GO:0004197), Molecular Function: cysteine-type peptidase activity (GO:0008234)	Peptidase%MER003979 - cpl-1 peptidase (Caenorhabditis elegans) [C01.066]#C01A#%218%82.1100917431193%1e-107	-	Y	-		0	0	1	0	0	0	0	0	0	0	0	0	0	0	0	0	0	0
	GS_13500	-	-	-	Y	-		-	IPR000215-Protease inhibitor I4, serpin IPR023796-Serpin domain	Molecular Function: serine-type endopeptidase inhibitor activity (GO:0004867)	Peptidase Inhibitor%MER018701 - serpin SRP-6 {{Caenorhabditis elegans}} (Caenorhabditis elegans) [I04.081]#I04#%186%27.9569892473118%1e-14	Y	-	Y		0	0	3	0	0	0	0	0	0	0	0	0	0	0	0	0	0	0
	GS_14378	-	-	-	Y	-		-	-	-	T19B10.2%CE16413 WBGene00011831 status:Confirmed UniProt:Q22562_CAEEL protein_id:CAA98547.1%HMM_hit%1.3e-124	-	-	-		0	0	3	0	0	0	0	0	0	0	0	0	0	0	0	0	0	0
	GS_11477	-	-	-	-	Y		-	IPR014782-Peptidase M1, membrane alanine aminopeptidase, N-terminal IPR001930-Peptidase M1, alanine aminopeptidase/leukotriene A4 hydrolase	Biological Process: proteolysis (GO:0006508), Molecular Function: metallopeptidase activity (GO:0008237), Molecular Function: zinc ion binding (GO:0008270)	sp|P55786|PSA_HUMAN%%Puromycin-sensitive aminopeptidase OS=Homo sapiens GN=NPEPPS PE=1 SV=2%%8.4e-23	-	-	-		0	0	0	3	0	0	0	0	0	0	0	0	0	0	0	0	0	0
	Liv_01603	-	-	-	-	Y		-	IPR002018-Carboxylesterase, type B	-	Peptidase%MER039145 - cholinesterase (Caenorhabditis elegans) [S09.980]#S09X#%67%35.8208955223881%1e-06	-	-	Y		0	0	0	1	0	0	0	0	0	0	0	0	0	0	0	0	0	0
	GS_01798	-	-	-	-	Y		K01369-legumain	IPR001096-Peptidase C13, legumain	Biological Process: proteolysis (GO:0006508), Molecular Function: cysteine-type endopeptidase activity (GO:0004197)	Peptidase%MER108267 - legumain (Brugia malayi) [C13.004]#C13#%259%65.6370656370656%1e-107	-	Y	-		0	0	0	2	0	0	0	0	0	0	0	0	0	0	0	0	0	0
	GS_03481	-	-	-	-	Y		K11836-ubiquitin carboxyl-terminal hydrolase 5/13	IPR001607-Zinc finger, UBP-type IPR013083-Zinc finger, RING/FYVE/PHD-type IPR015940-Ubiquitin-associated/translation elongation factor EF1B, N-terminal, eukaryote IPR009060-UBA-like IPR018200-Peptidase C19, ubiquitin carboxyl-terminal hydrolase 2, conserved site IPR001394-Peptidase C19, ubiquitin carboxyl-terminal hydrolase 2 IPR000449-Ubiquitin-associated/translation elongation factor EF1B, N-te…	Biological Process: ubiquitin-dependent protein catabolic process (GO:0006511), Molecular Function: protein binding (GO:0005515), Molecular Function: ubiquitin thiolesterase activity (GO:0004221), Molecular Function: zinc ion binding (GO:0008270)	Peptidase%MER005446 - family C19 unassigned peptidases (Caenorhabditis elegans) [C19.UPW]#C19#%514%40.272373540856%7e-99	-	-	Y		0	0	0	1	0	0	0	0	0	0	0	0	0	0	0	0	0	0
	GS_11940	-	-	-	-	Y		-	IPR007000-Phospholipase B-like	-	sp|Q9BL07|PLBL3_CAEEL%%Putative phospholipase B-like 3 OS=Caenorhabditis elegans GN=Y54F10AM.8 PE=1 SV=1%%1.7e-202	-	Y	-		0	0	0	4	0	0	0	0	0	0	0	0	0	0	0	0	0	0
	GS_18334	-	-	-	-	Y		-	IPR007000-Phospholipase B-like	-	sp|Q3TCN2|PLBL2_MOUSE%%Putative phospholipase B-like 2 OS=Mus musculus GN=Plbd2 PE=1 SV=2%%4.1e-228	-	-	Y		0	0	0	3	0	0	0	0	0	0	0	0	0	0	0	0	0	0
	GS_13060	-	-	-	-	Y		K03030-26S proteasome regulatory subunit N11	IPR000555-Mov34/MPN/PAD-1	Molecular Function: protein binding (GO:0005515)	Peptidase%MER125115 - Poh1 peptidase (Brugia malayi) [M67.001]#M67A#%314%93.312101910828%1e-172	-	-	Y		0	0	0	1	0	0	0	0	0	0	0	0	0	0	0	0	0	0
	GS_16309	-	-	-	-	Y		-	IPR019819-Carboxylesterase type B, conserved site IPR002168-Lipase, GDXG, active site IPR019826-Carboxylesterase type B, active site IPR002018-Carboxylesterase, type B	Biological Process: metabolic process (GO:0008152), Molecular Function: hydrolase activity (GO:0016787)	Peptidase%MER039145 - cholinesterase (Caenorhabditis elegans) [S09.980]#S09X#%253%44.2687747035573%6e-57	-	-	Y		0	0	0	3	0	0	0	0	0	0	0	0	0	0	0	0	0	0
	GS_01230	-	-	-	-	Y		-	IPR002018-Carboxylesterase, type B	-	Peptidase%MER039064 - acetylcholinesterase (Caenorhabditis briggsae) [S09.979]#S09X#%394%32.741116751269%3e-52	-	Y	-		0	0	0	2	0	0	0	0	0	0	0	0	0	0	0	0	0	0
	GS_19153	-	-	-	-	Y		-	IPR019826-Carboxylesterase type B, active site IPR002018-Carboxylesterase, type B	-	Peptidase%MER039064 - acetylcholinesterase (Caenorhabditis briggsae) [S09.979]#S09X#%388%29.639175257732%6e-55	Y	-	-		0	0	0	2	0	0	0	0	0	0	0	0	0	0	0	0	0	0
	GS_01127	-	-	-	-	Y		-	IPR018202-Peptidase S10, serine carboxypeptidase, active site IPR001563-Peptidase S10, serine carboxypeptidase	Biological Process: proteolysis (GO:0006508), Molecular Function: serine-type carboxypeptidase activity (GO:0004185)	Peptidase%MER119185 - serine carboxypeptidase A (Caenorhabditis briggsae) [S10.002]#S10#%518%43.050193050193%1e-102	-	-	Y		0	0	0	2	0	0	0	0	0	0	0	0	0	0	0	0	0	0
	GS_06945	-	-	-	-	Y		-	IPR018202-Peptidase S10, serine carboxypeptidase, active site IPR001563-Peptidase S10, serine carboxypeptidase	Biological Process: proteolysis (GO:0006508), Molecular Function: serine-type carboxypeptidase activity (GO:0004185)	Peptidase%MER119185 - serine carboxypeptidase A (Caenorhabditis briggsae) [S10.002]#S10#%179%61.4525139664804%7e-59	-	Y	-		0	0	0	1	0	0	0	0	0	0	0	0	0	0	0	0	0	0
	GS_03565	-	-	-	-	Y		-	IPR001466-Beta-lactamase-related IPR012338-Beta-lactamase/transpeptidase-like	-	Peptidase%MER017074 - family S12 unassigned peptidases (Caenorhabditis elegans) [S12.UPW]#S12#%382%57.3298429319372%1e-134	-	Y	-		0	0	0	2	0	0	0	0	0	0	0	0	0	0	0	0	0	0
	GS_00889	-	-	-	-	Y		K08675-Lon-like ATP-dependent protease	IPR003111-Peptidase S16, lon N-terminal IPR015947-Pseudouridine synthase/archaeosine transglycosylase-like IPR008268-Peptidase S16, active site IPR003593-ATPase, AAA+ type, core IPR008269-Peptidase S16, Lon C-terminal IPR004815-Peptidase S16, ATP-dependent protease La IPR020568-Ribosomal protein S5 domain 2-type fold IPR003959-ATPase, AAA-type, core	Biological Process: proteolysis (GO:0006508), Molecular Function: ATP binding (GO:0005524), Molecular Function: ATP-dependent peptidase activity (GO:0004176), Molecular Function: nucleoside-triphosphatase activity (GO:0017111), Molecular Function: nucleotide binding (GO:0000166), Molecular Function: serine-type endopeptidase activity (GO:0004252)	Peptidase%MER109518 - PIM1 peptidase (Brugia malayi) [S16.002]#S16#%257%78.988326848249%1e-115	Y	-	-		0	0	0	1	0	0	0	0	0	0	0	0	0	0	0	0	0	0
	GS_08933	-	-	-	-	Y		K13280-signal peptidase, endoplasmic reticulum-type	IPR019756-Peptidase S26A, signal peptidase I, serine active site IPR019758-Peptidase S26A, signal peptidase I, conserved site IPR001733-Peptidase S26B, eukaryotic signal peptidase IPR011056-Peptidase S24/S26A/S26B/S26C, beta-ribbon domain IPR015927-Peptidase S24/S26A/S26B/S26C IPR019759-Peptidase S24/S26A/S26B	Biological Process: signal peptide processing (GO:0006465), Cellular Component: integral to membrane (GO:0016021), Cellular Component: membrane (GO:0016020), Molecular Function: peptidase activity (GO:0008233), Molecular Function: serine-type peptidase activity (GO:0008236)	Peptidase%MER137333 - signalase {animal} 21 kDa component (Brugia malayi) [S26.010]#S26B#%136%83.0882352941177%1e-61	Y	-	Y		0	0	0	1	0	0	0	0	0	0	0	0	0	0	0	0	0	0
	GS_04641	-	-	-	-	Y		-	IPR008758-Peptidase S28	Biological Process: proteolysis (GO:0006508), Molecular Function: serine-type peptidase activity (GO:0008236)	Peptidase%MER003225 - thymus-specific serine peptidase (Caenorhabditis elegans) [S28.003]#S28#%466%54.7210300429184%1e-149	-	Y	-		0	0	0	3	0	0	0	0	0	0	0	0	0	0	0	0	0	0
	GS_07735	-	-	-	-	Y		-	IPR008758-Peptidase S28	Biological Process: proteolysis (GO:0006508), Molecular Function: serine-type peptidase activity (GO:0008236)	Peptidase%MER003015 - thymus-specific serine peptidase (Caenorhabditis elegans) [S28.003]#S28#%463%47.9481641468683%1e-120	-	Y	-		0	0	0	3	0	0	0	0	0	0	0	0	0	0	0	0	0	0
	GS_16223	-	-	-	-	Y		-	IPR008758-Peptidase S28	Biological Process: proteolysis (GO:0006508), Molecular Function: serine-type peptidase activity (GO:0008236)	Peptidase%MER003557 - thymus-specific serine peptidase (Caenorhabditis elegans) [S28.003]#S28#%283%45.583038869258%8e-71	-	-	Y		0	0	0	3	0	0	0	0	0	0	0	0	0	0	0	0	0	0
	GS_23795	-	-	-	-	Y		-	IPR008758-Peptidase S28	Biological Process: proteolysis (GO:0006508), Molecular Function: serine-type peptidase activity (GO:0008236)	Peptidase%MER003225 - thymus-specific serine peptidase (Caenorhabditis elegans) [S28.003]#S28#%126%61.9047619047619%4e-41	-	Y	-		0	0	0	1	0	0	0	0	0	0	0	0	0	0	0	0	0	0
	GS_11889	-	-	-	-	Y		-	IPR000639-Epoxide hydrolase-like IPR000073-Alpha/beta hydrolase fold-1	Molecular Function: catalytic activity (GO:0003824)	Peptidase%MER209340 - epoxide hydrolase (Caenorhabditis briggsae) [S33.971]#S33#%294%44.2176870748299%2e-80	Y	-	-		0	0	0	6	0	0	0	0	0	0	0	0	0	0	0	0	0	0
	GS_15239	-	-	-	-	Y		K13365-Na(+)/H(+) exchange regulatory cofactor NHE-RF1	IPR001478-PDZ/DHR/GLGF	Molecular Function: protein binding (GO:0005515)	Channels and Transporters%gnl|TC-DB|O14745%8%Accessory factors involved in transport%8.A.%Auxillary transport proteins%8.A.2% Secretin Auxiliary Lipoprotein (SAL) Family.%8.A.24.1.1% Ezrin/Radixin/Moesin-binding Phosphoprotein 50 (EBP50) Family.; Secretin Auxiliary Lipoprotein (SAL) Family.%Ezrin-radixin-moesin-binding phosphoprotein 50 (EBP50) (Na(+)/H(+) exchange regulatory cofactor NHE-RF) (NH…	-	-	-		0	0	0	45	0	0	0	0	0	0	0	0	0	0	0	0	0	0
	GS_20046	-	-	-	-	Y		K02930-large subunit ribosomal protein L4e	IPR002136-Ribosomal protein L4/L1e IPR013000-Ribosomal protein L4/L1e, eukaryotic/archaeal, conserved site IPR023574-Ribosomal protein L4 domain	Biological Process: translation (GO:0006412), Cellular Component: ribosome (GO:0005840), Molecular Function: structural constituent of ribosome (GO:0003735)	bmy:Bm1_14285 60S ribosomal protein L4; K02930 large subunit ribosomal protein L4e%360%81.3888888888889%1e-175	-	-	-		0	0	0	26	0	0	0	0	0	0	0	0	0	0	0	0	0	0
	GS_15374	-	-	-	-	Y		K02866-large subunit ribosomal protein L10e	IPR001197-Ribosomal protein L10e IPR018255-Ribosomal protein L10e, conserved site IPR016180-Ribosomal protein L10e/L16	Biological Process: translation (GO:0006412), Cellular Component: intracellular (GO:0005622), Cellular Component: ribosome (GO:0005840), Molecular Function: structural constituent of ribosome (GO:0003735)	bmy:Bm1_34250 60S ribosomal protein L10; K02866 large subunit ribosomal protein L10e%214%91.588785046729%1e-115	-	-	-		0	0	0	24	0	0	0	0	0	0	0	0	0	0	0	0	0	0
	GS_07825	-	-	-	-	Y		-	IPR002490-ATPase, V0/A0 complex, 116kDa subunit	Biological Process: ATP hydrolysis coupled proton transport (GO:0015991), Cellular Component: proton-transporting two-sector ATPase complex, proton-transporting domain (GO:0033177), Molecular Function: hydrogen ion transmembrane transporter activity (GO:0015078)	Channels and Transporters%gnl|TC-DB|Q93050%3%Primary active transporters%3.A.%P-P-bond-hydrolysis-driven transporters%3.A.2%" H+- or Na+-translocating F-type, V-type and A-type ATPase (F-ATPase) Superfamily."%3.A.2.2.4%" H+- or Na+-translocating F-type, V-type and A-type ATPase (F-ATPase) Superfamily."%Vacuolar proton translocating ATPase 116 kDa subunit a isoform 1 - Homo sapiens (Human).%362%40…	-	-	Y		0	0	0	23	0	0	0	0	0	0	0	0	0	0	0	0	0	0
	GS_14861	-	-	-	-	Y		K08054-calnexin	IPR009033-Calreticulin/calnexin, P IPR013320-Concanavalin A-like lectin/glucanase, subgroup IPR001580-Calreticulin/calnexin IPR008985-Concanavalin A-like lectin/glucanase IPR018124-Calreticulin/calnexin, conserved site	Biological Process: protein folding (GO:0006457), Cellular Component: endoplasmic reticulum (GO:0005783), Molecular Function: calcium ion binding (GO:0005509), Molecular Function: unfolded protein binding (GO:0051082)	bmy:Bm1_45355 Calreticulin family protein; K08054 calnexin%618%58.7378640776699%0.0	Y	-	-		0	0	0	23	0	0	0	0	0	0	0	0	0	0	0	0	0	0
	GS_15911	-	-	-	-	Y		K00162-pyruvate dehydrogenase E1 component subunit beta	IPR005476-Transketolase, C-terminal IPR005475-Transketolase-like, pyrimidine-binding domain IPR015941-Transketolase-like, C-terminal IPR009014-Transketolase, C-terminal/Pyruvate-ferredoxin oxidoreductase, domain II	Biological Process: metabolic process (GO:0008152), Molecular Function: catalytic activity (GO:0003824)	sp|Q7N0J7|DXS_PHOLL%%1-deoxy-D-xylulose-5-phosphate synthase OS=Photorhabdus luminescens subsp. laumondii GN=dxs PE=3 SV=1%%9.4e-132	-	-	Y		0	0	0	22	0	0	0	0	0	0	0	0	0	0	0	0	0	0
	GS_12520	-	-	-	-	Y		K10356-myosin I	IPR010926-Myosin tail 2 IPR000048-IQ motif, EF-hand binding site IPR001609-Myosin head, motor domain	Cellular Component: myosin complex (GO:0016459), Molecular Function: ATP binding (GO:0005524), Molecular Function: motor activity (GO:0003774), Molecular Function: protein binding (GO:0005515)	cel:T02C12.1 hum-5; Heavy chain, Unconventional Myosin family member (hum-5); K10356 myosin I%844%60.9004739336493%0.0	-	-	Y		0	0	0	21	0	0	0	0	0	0	0	0	0	0	0	0	0	0
	GS_21093	-	-	-	-	Y		K12304-soluble calcium-activated nucleotidase 1	IPR009283-Apyrase	Molecular Function: calcium ion binding (GO:0005509), Molecular Function: pyrophosphatase activity (GO:0016462)	cel:F08C6.6 apy-1; APYrase family member (apy-1); K12304 soluble calcium-activated nucleotidase 1 [EC:3.6.1.6]%318%56.9182389937107%1e-103	Y	-	-		0	0	0	20	0	0	0	0	0	0	0	0	0	0	0	0	0	0
	GS_15944	-	-	-	-	Y		K12666-oligosaccharyltransferase complex subunit alpha (ribophorin I)	IPR007676-Ribophorin I	Biological Process: protein glycosylation (GO:0006486), Cellular Component: endoplasmic reticulum (GO:0005783), Cellular Component: integral to membrane (GO:0016021), Molecular Function: dolichyl-diphosphooligosaccharide-protein glycotransferase activity (GO:0004579)	bmy:Bm1_31230 Ribophorin I family protein; K12666 oligosaccharyltransferase complex subunit alpha (ribophorin I)%566%66.2544169611307%0.0	Y	-	-		0	0	0	19	0	0	0	0	0	0	0	0	0	0	0	0	0	0
	GS_19411	-	-	-	-	Y		K00161-pyruvate dehydrogenase E1 component subunit alpha	IPR001017-Dehydrogenase, E1 component	Biological Process: metabolic process (GO:0008152), Molecular Function: oxidoreductase activity, acting on the aldehyde or oxo group of donors, disulfide as acceptor (GO:0016624)	sp|P26267|ODPA_ASCSU%%Pyruvate dehydrogenase E1 component subunit alpha type I, mitochondrial OS=Ascaris suum PE=1 SV=1%%3.8e-200	-	-	Y		0	0	0	19	0	0	0	0	0	0	0	0	0	0	0	0	0	0
	GS_03234	-	-	-	-	Y		K00658-2-oxoglutarate dehydrogenase E2 component (dihydrolipoamide succinyltransferase)	IPR003016-2-oxo acid dehydrogenase, lipoyl-binding site IPR023213-Chloramphenicol acetyltransferase-like domain IPR011053-Single hybrid motif IPR001078-2-oxoacid dehydrogenase acyltransferase, catalytic domain IPR000089-Biotin/lipoyl attachment IPR006255-Dihydrolipoamide succinyltransferase	Biological Process: metabolic process (GO:0008152), Biological Process: tricarboxylic acid cycle (GO:0006099), Cellular Component: oxoglutarate dehydrogenase complex (GO:0045252), Molecular Function: acyltransferase activity (GO:0008415), Molecular Function: dihydrolipoyllysine-residue succinyltransferase activity (GO:0004149)	sp|P06959|ODP2_ECOLI%%Dihydrolipoyllysine-residue acetyltransferase component of pyruvate dehydrogenase complex OS=Escherichia coli (strain K12) GN=aceF PE=1 SV=3%%6.5e-175	-	-	-		0	0	0	17	0	0	0	0	0	0	0	0	0	0	0	0	0	0
	GS_06610	-	-	-	-	Y		K15102-solute carrier family 25 (mitochondrial phosphate transporter), member 3	IPR018108-Mitochondrial substrate/solute carrier IPR023395-Mitochondrial carrier domain	-	Channels and Transporters%gnl|TC-DB|P12234%2%Electorchemical potential-driven transporters%2.A.%"Porters (uniporters, symporters, antiporters)"%2.A.2%Cation Symporter Family%2.A.29.4.1% Glycoside-Pentoside-Hexuronide (GPH):Cation Symporter Family.; Mitochondrial Carrier (MC) Family .%"PHOSPHATE CARRIER PROTEIN, MITOCHONDRIAL PRECURSOR (PTP) - Bos taurus (Bovine)."%300%71.66666667%1.00E-122	Y	-	-		0	0	0	17	0	0	0	0	0	0	0	0	0	0	0	0	0	0
	GS_08413	-	-	-	-	Y		K02150-V-type H+-transporting ATPase subunit E	IPR002842-ATPase, V1/A1 complex, subunit E	Biological Process: ATP hydrolysis coupled proton transport (GO:0015991), Cellular Component: proton-transporting two-sector ATPase complex, catalytic domain (GO:0033178), Molecular Function: proton-transporting ATPase activity, rotational mechanism (GO:0046961)	Channels and Transporters%gnl|TC-DB|P36543%3%Primary active transporters%3.A.%P-P-bond-hydrolysis-driven transporters%3.A.2%" H+- or Na+-translocating F-type, V-type and A-type ATPase (F-ATPase) Superfamily."%3.A.2.2.4%" H+- or Na+-translocating F-type, V-type and A-type ATPase (F-ATPase) Superfamily."%Vacuolar ATP synthase subunit E 1 - Homo sapiens (Human).%100%47%2.00E-21	-	-	-		0	0	0	17	0	0	0	0	0	0	0	0	0	0	0	0	0	0
	GS_21361	-	-	-	-	Y		K05658-ATP-binding cassette, subfamily B (MDR/TAP), member 1	IPR017940-ABC transporter, integral membrane type 1 IPR011527-ABC transporter, transmembrane domain, type 1 IPR001140-ABC transporter, transmembrane domain IPR003439-ABC transporter-like IPR003593-ATPase, AAA+ type, core IPR017871-ABC transporter, conserved site	Biological Process: transmembrane transport (GO:0055085), Biological Process: transport (GO:0006810), Cellular Component: integral to membrane (GO:0016021), Molecular Function: ATP binding (GO:0005524), Molecular Function: ATPase activity (GO:0016887), Molecular Function: ATPase activity, coupled to transmembrane movement of substances (GO:0042626), Molecular Function: nucleoside-triphosphatase a…	Channels and Transporters%gnl|TC-DB|P08183%3%Primary active transporters%3.A.%P-P-bond-hydrolysis-driven transporters%3.A.1% ATP-binding Cassette (ABC) Superfamily.%3.A.1.201.1% ATP-binding Cassette (ABC) Superfamily.%Multidrug resistance protein 1 (P-glycoprotein 1) - Homo sapiens (Human).%1258%41.25596184%0	Y	-	-		0	0	0	16	0	0	0	0	0	0	0	0	0	0	0	0	0	0
	GS_06663	-	-	-	-	Y		K03934-NADH dehydrogenase (ubiquinone) Fe-S protein 1	IPR001041-Ferredoxin IPR019574-NADH:ubiquinone oxidoreductase, subunit G, iron-sulphur binding IPR015405-NADH-quinone oxidoreductase, chain G, C-terminal IPR012675-Beta-grasp fold, ferredoxin-type IPR006656-Molybdopterin oxidoreductase IPR000283-NADH:ubiquinone oxidoreductase, 75kDa subunit, conserved site	Biological Process: ATP synthesis coupled electron transport (GO:0042773), Biological Process: oxidation-reduction process (GO:0055114), Cellular Component: membrane (GO:0016020), Molecular Function: electron carrier activity (GO:0009055), Molecular Function: iron-sulfur cluster binding (GO:0051536), Molecular Function: NADH dehydrogenase (ubiquinone) activity (GO:0008137), Molecular Function: ox…	Channels and Transporters%gnl|TC-DB|P15690%3%Primary active transporters%3.D.%Oxidoreduction-driven transporters%3.D.1%Oxidoreduction-driven transporters%3.D.1.6.1% H+ or Na+-translocating NADH Dehydrogenase (NDH) Family.%"NADH-ubiquinone oxidoreductase 75 kDa subunit, mitochondrial - Bos taurus (Bovine)."%476%53.78151261%1.00E-152	-	Y	Y		0	0	0	15	0	0	0	0	0	0	0	0	0	0	0	0	0	0
	GS_16789	-	-	-	-	Y		-	IPR004167-E3 binding IPR003016-2-oxo acid dehydrogenase, lipoyl-binding site IPR011053-Single hybrid motif IPR000089-Biotin/lipoyl attachment	Biological Process: metabolic process (GO:0008152), Molecular Function: acyltransferase activity (GO:0008415)	xla:398314 dlat; dihydrolipoamide S-acetyltransferase (EC:2.3.1.12); K00627 pyruvate dehydrogenase E2 component (dihydrolipoamide acetyltransferase) [EC:2.3.1.12]%453%41.9426048565121%7e-82	-	-	-		0	0	0	15	0	0	0	0	0	0	0	0	0	0	0	0	0	0
	GS_24138	-	-	-	-	Y		K11259-acetolactate synthase-like protein	IPR012000-Thiamine pyrophosphate enzyme, central domain IPR012001-Thiamine pyrophosphate enzyme, N-terminal TPP-binding domain IPR011766-Thiamine pyrophosphate enzyme, C-terminal TPP-binding IPR000399-TPP-binding enzyme, conserved site	Molecular Function: catalytic activity (GO:0003824), Molecular Function: magnesium ion binding (GO:0000287), Molecular Function: thiamine pyrophosphate binding (GO:0030976), Molecular Function: transferase activity (GO:0016740)	sp|Q3YZU2|MEND_SHISS%%2-succinyl-5-enolpyruvyl-6-hydroxy-3-cyclohexene-1-carboxylate synthase OS=Shigella sonnei (strain Ss046) GN=menD PE=3 SV=1%%5.5e-164	-	-	-		0	0	0	15	0	0	0	0	0	0	0	0	0	0	0	0	0	0
	GS_00886	-	-	-	-	Y		K02995-small subunit ribosomal protein S8e	IPR022309-Ribosomal protein S8e/ribosomal biogenesis NSA2 IPR018283-Ribosomal protein S8e, conserved site IPR001047-Ribosomal protein S8e	Biological Process: translation (GO:0006412), Cellular Component: intracellular (GO:0005622), Cellular Component: ribosome (GO:0005840), Molecular Function: structural constituent of ribosome (GO:0003735)	bmy:Bm1_11120 40S ribosomal protein S8; K02995 small subunit ribosomal protein S8e%208%95.1923076923077%1e-113	-	-	-		0	0	0	13	0	0	0	0	0	0	0	0	0	0	0	0	0	0
	GS_02474	-	-	-	-	Y		-	IPR001107-Band 7 protein IPR000163-Prohibitin	Cellular Component: membrane (GO:0016020)	bmy:Bm1_04905 mitochondrial prohibitin complex protein 1%271%86.7158671586716%1e-131	-	-	-		0	0	0	13	0	0	0	0	0	0	0	0	0	0	0	0	0	0
	GS_07518	-	-	-	-	Y		K05658-ATP-binding cassette, subfamily B (MDR/TAP), member 1	IPR017940-ABC transporter, integral membrane type 1 IPR011527-ABC transporter, transmembrane domain, type 1 IPR001140-ABC transporter, transmembrane domain IPR003439-ABC transporter-like IPR003593-ATPase, AAA+ type, core IPR017871-ABC transporter, conserved site	Biological Process: transmembrane transport (GO:0055085), Biological Process: transport (GO:0006810), Cellular Component: integral to membrane (GO:0016021), Molecular Function: ATP binding (GO:0005524), Molecular Function: ATPase activity (GO:0016887), Molecular Function: ATPase activity, coupled to transmembrane movement of substances (GO:0042626), Molecular Function: nucleoside-triphosphatase a…	Channels and Transporters%gnl|TC-DB|P08183%3%Primary active transporters%3.A.%P-P-bond-hydrolysis-driven transporters%3.A.1% ATP-binding Cassette (ABC) Superfamily.%3.A.1.201.1% ATP-binding Cassette (ABC) Superfamily.%Multidrug resistance protein 1 (P-glycoprotein 1) - Homo sapiens (Human).%1147%46.81778553%0	Y	-	Y		0	0	0	13	0	0	0	0	0	0	0	0	0	0	0	0	0	0
	GS_23010	-	-	-	-	Y		-	IPR007123-Gelsolin domain IPR007122-Gelsolin	Molecular Function: actin binding (GO:0003779)	bmy:Bm1_33155 gelsolin; K05768 gelsolin%283%52.6501766784452%4e-79	-	-	-		0	0	0	13	0	0	0	0	0	0	0	0	0	0	0	0	0	0
	GS_09076	-	-	-	-	Y		-	IPR001452-Src homology-3 domain IPR011511-Variant SH3	Molecular Function: protein binding (GO:0005515)	bmy:Bm1_37645 epidermal growth factor receptor pathway substrate 8 splice variant B%501%73.0538922155689%0.0	-	-	-		0	0	0	12	0	0	0	0	0	0	0	0	0	0	0	0	0	0
	GS_13259	-	-	-	-	Y		K07515-enoyl-CoA hydratase / long-chain 3-hydroxyacyl-CoA dehydrogenase	IPR001753-Crotonase, core IPR008927-6-phosphogluconate dehydrogenase, C-terminal-like IPR016040-NAD(P)-binding domain IPR013328-Dehydrogenase, multihelical IPR006108-3-hydroxyacyl-CoA dehydrogenase, C-terminal IPR006176-3-hydroxyacyl-CoA dehydrogenase, NAD binding	Biological Process: fatty acid metabolic process (GO:0006631), Biological Process: metabolic process (GO:0008152), Molecular Function: binding (GO:0005488), Molecular Function: catalytic activity (GO:0003824), Molecular Function: coenzyme binding (GO:0050662), Molecular Function: oxidoreductase activity (GO:0016491)	bmy:Bm1_51120 hydroxyacyl-Coenzyme A dehydrogenase/3-ketoacyl-Coenzyme A thiolase/enoyl-Coenzyme A hydratase, putative; K07515 enoyl-CoA hydratase / long-chain 3-hydroxyacyl-CoA dehydrogenase [EC:4.2.1.17 1.1.1.211]%609%65.3530377668309%0.0	-	-	Y		0	0	0	12	0	0	0	0	0	0	0	0	0	0	0	0	0	0
	GS_04171	-	-	-	-	Y		K09495-T-complex protein 1 subunit gamma	IPR002194-Chaperonin TCP-1, conserved site IPR012719-T-complex protein 1, gamma subunit IPR002423-Chaperonin Cpn60/TCP-1 IPR017998-Chaperone, tailless complex polypeptide 1	Biological Process: cellular protein metabolic process (GO:0044267), Biological Process: protein folding (GO:0006457), Molecular Function: ATP binding (GO:0005524), Molecular Function: unfolded protein binding (GO:0051082)	bmy:Bm1_09595 T-complex protein 1, gamma subunit; K09495 T-complex protein 1 subunit gamma%541%80.5914972273567%0.0	-	-	Y		0	0	0	11	0	0	0	0	0	0	0	0	0	0	0	0	0	0
	GS_11267	-	-	-	-	Y		-	IPR012816-Conserved hypothetical protein CHP02464	-	sp|Q5UR67|YR617_MIMIV%%Uncharacterized protein R617 OS=Acanthamoeba polyphaga mimivirus GN=MIMI_R617 PE=4 SV=1%%6.2e-53	-	-	-		0	0	0	11	0	0	0	0	0	0	0	0	0	0	0	0	0	0
	GS_13339	-	-	-	-	Y		-	IPR001790-Ribosomal protein L10/acidic P0 IPR001813-Ribosomal protein 60S	Biological Process: ribosome biogenesis (GO:0042254), Biological Process: translational elongation (GO:0006414), Cellular Component: intracellular (GO:0005622), Cellular Component: ribosome (GO:0005840), Molecular Function: structural constituent of ribosome (GO:0003735)	bmy:Bm1_31485 60S acidic ribosomal protein P0; K02941 large subunit ribosomal protein LP0%320%74.0625%1e-130	-	-	-		0	0	0	11	0	0	0	0	0	0	0	0	0	0	0	0	0	0
	GS_14298	-	-	-	-	Y		K00693-glycogen(starch) synthase	IPR008631-Glycogen synthase	Biological Process: glycogen biosynthetic process (GO:0005978), Molecular Function: glycogen (starch) synthase activity (GO:0004373)	cel:Y46G5A.31 gsy-1; Glycogen SYnthase family member (gsy-1); K00693 glycogen(starch) synthase [EC:2.4.1.11]%673%74.2942050520059%0.0	-	-	Y		0	0	0	11	0	0	0	0	0	0	0	0	0	0	0	0	0	0
	GS_20884	-	-	-	-	Y		K06816-golgi apparatus protein 1	IPR001893-Cysteine-rich Golgi apparatus protein 1 repeat IPR017873-Cysteine-rich Golgi apparatus protein 1 repeat, eukaryote	Cellular Component: Golgi membrane (GO:0000139), Cellular Component: membrane (GO:0016020)	bmy:Bm1_35585 Cysteine rich repeat family protein; K06816 golgi apparatus protein 1%1131%64.9867374005305%0.0	Y	-	-		0	0	0	11	0	0	0	0	0	0	0	0	0	0	0	0	0	0
	GS_01835	-	-	-	-	Y		K00111-glycerol-3-phosphate dehydrogenase	IPR000447-FAD-dependent glycerol-3-phosphate dehydrogenase IPR002048-Calcium-binding EF-hand IPR018247-EF-Hand 1, calcium-binding site IPR018249-EF-HAND 2 IPR011992-EF-hand-like domain IPR006076-FAD dependent oxidoreductase	Biological Process: glycerol-3-phosphate metabolic process (GO:0006072), Biological Process: oxidation-reduction process (GO:0055114), Cellular Component: glycerol-3-phosphate dehydrogenase complex (GO:0009331), Molecular Function: calcium ion binding (GO:0005509), Molecular Function: glycerol-3-phosphate dehydrogenase activity (GO:0004368), Molecular Function: oxidoreductase activity (GO:0016491)	sp|Q4R755|GPDM_MACFA%%Glycerol-3-phosphate dehydrogenase, mitochondrial OS=Macaca fascicularis GN=GPD2 PE=2 SV=1%%7.3e-230	Y	-	Y		0	0	0	10	0	0	0	0	0	0	0	0	0	0	0	0	0	0
	GS_02407	-	-	-	-	Y		K02146-V-type H+-transporting ATPase subunit AC39	IPR002843-ATPase, V0/A0 complex, subunit C/D	Biological Process: ATP hydrolysis coupled proton transport (GO:0015991), Cellular Component: proton-transporting two-sector ATPase complex, proton-transporting domain (GO:0033177), Molecular Function: hydrogen ion transmembrane transporter activity (GO:0015078)	Channels and Transporters%gnl|TC-DB|P61421%3%Primary active transporters%3.A.%P-P-bond-hydrolysis-driven transporters%3.A.2%" H+- or Na+-translocating F-type, V-type and A-type ATPase (F-ATPase) Superfamily."%3.A.2.2.4%" H+- or Na+-translocating F-type, V-type and A-type ATPase (F-ATPase) Superfamily."%Vacuolar ATP synthase subunit d 1 - Homo sapiens (Human).%346%75.43352601%1.00E-164	-	-	Y		0	0	0	10	0	0	0	0	0	0	0	0	0	0	0	0	0	0
	GS_04465	-	-	-	-	Y		K00323-NAD(P) transhydrogenase	IPR004571-NAD(P) transhydrogenase, alpha subunit IPR007886-Alanine dehydrogenase/PNT, N-terminal IPR016040-NAD(P)-binding domain IPR007698-Alanine dehydrogenase/PNT, C-terminal IPR008143-Alanine dehydrogenase/pyridine nucleotide transhydrogenase, conserved site-2 IPR004003-NAD(P) transhydrogenase, beta subunit	Biological Process: oxidation-reduction process (GO:0055114), Biological Process: proton transport (GO:0015992), Molecular Function: binding (GO:0005488), Molecular Function: NAD(P)+ transhydrogenase (AB-specific) activity (GO:0008750), Molecular Function: NAD(P)+ transhydrogenase activity (GO:0008746), Molecular Function: oxidoreductase activity (GO:0016491)	Channels and Transporters%gnl|TC-DB|P11024%3%Primary active transporters%3.D.%Oxidoreduction-driven transporters%3.D.2%Oxidoreduction-driven transporters%3.D.2.3.1% Proton-translocating Transhydrogenase (PTH) Family.%"NAD(P) TRANSHYDROGENASE, MITOCHONDRIAL PRECURSOR (EC 1.6.1.2) (PYRIDINE NUCLEOTIDE TRANSHYDROGENASE) (NICOTINAMIDE NUCLEOTIDE TRANSHYDROGENASE) - Bos taurus (Bovine)."%605%55.537190…	Y	-	-		0	0	0	10	0	0	0	0	0	0	0	0	0	0	0	0	0	0
	GS_04877	-	-	-	-	Y		K02877-large subunit ribosomal protein L15e	IPR012678-Ribosomal protein L23/L15e IPR020925-Ribosomal protein L15e, conserved site IPR000439-Ribosomal protein L15e	Biological Process: translation (GO:0006412), Cellular Component: intracellular (GO:0005622), Cellular Component: ribosome (GO:0005840), Molecular Function: structural constituent of ribosome (GO:0003735)	bmy:Bm1_20955 60S ribosomal protein L15; K02877 large subunit ribosomal protein L15e%204%89.7058823529412%2e-97	-	-	-		0	0	0	10	0	0	0	0	0	0	0	0	0	0	0	0	0	0
	GS_11749	-	-	-	-	Y		K01078-acid phosphatase	IPR000560-Histidine phosphatase superfamily, clade-2	Molecular Function: acid phosphatase activity (GO:0003993)	bmy:Bm1_24820 Histidine acid phosphatase family protein%405%37.7777777777778%2e-71	Y	-	Y		0	0	0	10	0	0	0	0	0	0	0	0	0	0	0	0	0	0
	GS_14359	-	-	-	-	Y		K02938-large subunit ribosomal protein L8e	IPR002171-Ribosomal protein L2 IPR016027-Nucleic acid-binding, OB-fold-like IPR022666-Ribosomal Proteins L2, RNA binding domain IPR014726-Ribosomal protein L2, domain 3 IPR008991-Translation protein SH3-like IPR012340-Nucleic acid-binding, OB-fold IPR014722-Translation protein SH3-like, subgroup IPR022669-Ribosomal protein L2, C-terminal IPR022671-Ribosomal protein L2, conserved site	Biological Process: translation (GO:0006412), Cellular Component: intracellular (GO:0005622), Cellular Component: ribosome (GO:0005840), Molecular Function: structural constituent of ribosome (GO:0003735)	bmy:Bm1_09075 60S ribosomal protein L8; K02938 large subunit ribosomal protein L8e%260%93.4615384615385%1e-140	-	-	-		0	0	0	10	0	0	0	0	0	0	0	0	0	0	0	0	0	0
	GS_14475	-	-	-	-	Y		K02882-large subunit ribosomal protein L18Ae	IPR023573-Ribosomal protein L18a/LX IPR021138-Ribosomal protein L18a	Biological Process: translation (GO:0006412), Cellular Component: ribosome (GO:0005840), Molecular Function: structural constituent of ribosome (GO:0003735)	bmy:Bm1_23030 60S ribosomal protein L18a; K02882 large subunit ribosomal protein L18Ae%180%84.4444444444444%7e-90	-	-	-		0	0	0	10	0	0	0	0	0	0	0	0	0	0	0	0	0	0
	GS_16668	-	-	-	-	Y		-	IPR007123-Gelsolin domain IPR007122-Gelsolin	Molecular Function: actin binding (GO:0003779)	sp|O93510|GELS_CHICK%%Gelsolin OS=Gallus gallus GN=GSN PE=2 SV=1%%2.8e-207	-	-	Y		0	0	0	10	0	0	0	0	0	0	0	0	0	0	0	0	0	0
	GS_24000	-	-	-	-	Y		K13525-transitional endoplasmic reticulum ATPase	IPR004201-Cell division protein 48, Cdc48, domain 2 IPR005938-ATPase, AAA-type, CDC48 IPR015415-Vps4 oligomerisation, C-terminal IPR003338-ATPase, AAA-type, VAT, N-terminal IPR003593-ATPase, AAA+ type, core IPR003960-ATPase, AAA-type, conserved site IPR003959-ATPase, AAA-type, core IPR009010-Aspartate decarboxylase-like fold	Molecular Function: ATP binding (GO:0005524), Molecular Function: binding (GO:0005488), Molecular Function: hydrolase activity (GO:0016787), Molecular Function: nucleoside-triphosphatase activity (GO:0017111), Molecular Function: nucleotide binding (GO:0000166)	Channels and Transporters%gnl|TC-DB|P55072%3%Primary active transporters%3.A.%P-P-bond-hydrolysis-driven transporters%3.A.1% ATP-binding Cassette (ABC) Superfamily.%3.A.16.1.1% ATP-binding Cassette (ABC) Superfamily.; Endoplasmic Reticular Retrotranslocon (ER-RT) Family.%Transitional endoplasmic reticulum ATPase (TER ATPase) (15S Mg(2+)- ATPase p97 subunit) (Valosin-containing protein) (VCP) - Ho…	-	-	-		0	0	0	10	0	0	0	0	0	0	0	0	0	0	0	0	0	0
	GS_01666	-	-	-	-	Y		K02960-small subunit ribosomal protein S16e	IPR014721-Ribosomal protein S5 domain 2-type fold, subgroup IPR000754-Ribosomal protein S9 IPR020574-Ribosomal protein S9, conserved site IPR020568-Ribosomal protein S5 domain 2-type fold	Biological Process: translation (GO:0006412), Cellular Component: intracellular (GO:0005622), Cellular Component: ribosome (GO:0005840), Molecular Function: structural constituent of ribosome (GO:0003735)	bmy:Bm1_14095 40S ribosomal protein S16; K02960 small subunit ribosomal protein S16e%139%96.4028776978417%6e-72	-	-	-		0	0	0	9	0	0	0	0	0	0	0	0	0	0	0	0	0	0
	GS_03380	-	-	-	-	Y		K03954-NADH dehydrogenase (ubiquinone) 1 alpha subcomplex 10	IPR003442-Uncharacterised protein family UPF0079, ATPase bacteria IPR002624-Deoxynucleoside kinase	Biological Process: nucleobase, nucleoside, nucleotide and nucleic acid metabolic process (GO:0006139), Molecular Function: ATP binding (GO:0005524), Molecular Function: phosphotransferase activity, alcohol group as acceptor (GO:0016773)	Channels and Transporters%gnl|TC-DB|P34942%3%Primary active transporters%3.D.%Oxidoreduction-driven transporters%3.D.1%Oxidoreduction-driven transporters%3.D.1.6.1% H+ or Na+-translocating NADH Dehydrogenase (NDH) Family.%"NADH dehydrogenase [ubiquinone] 1 alpha subcomplex subunit 10, mitochondrial - Bos taurus (Bovine)."%244%34.83606557%9.00E-27	-	Y	-		0	0	0	9	0	0	0	0	0	0	0	0	0	0	0	0	0	0
	GS_03664	-	-	-	-	Y		K11163-dehydrogenase/reductase SDR family member 1	IPR002198-Short-chain dehydrogenase/reductase SDR IPR002347-Glucose/ribitol dehydrogenase IPR016040-NAD(P)-binding domain	Biological Process: metabolic process (GO:0008152), Biological Process: oxidation-reduction process (GO:0055114), Molecular Function: binding (GO:0005488), Molecular Function: oxidoreductase activity (GO:0016491)	cel:Y32H12A.3 dhs-9; DeHydrogenases, Short chain family member (dhs-9); K11163 dehydrogenase/reductase SDR family member 1 [EC:1.1.-.-]%332%58.1325301204819%1e-101	-	-	Y		0	0	0	9	0	0	0	0	0	0	0	0	0	0	0	0	0	0
	GS_03863	-	-	-	-	Y		K02936-large subunit ribosomal protein L7Ae	IPR004038-Ribosomal protein L7Ae/L30e/S12e/Gadd45 IPR018492-Ribosomal protein L7Ae/L8/Nhp2 family IPR004037-Ribosomal protein L7Ae conserved site IPR001921-Ribosomal protein L7A/L8	Biological Process: ribosome biogenesis (GO:0042254), Cellular Component: ribonucleoprotein complex (GO:0030529)	bmy:Bm1_16165 60S ribosomal protein L7a; K02936 large subunit ribosomal protein L7Ae%235%84.2553191489362%1e-107	-	-	-		0	0	0	9	0	0	0	0	0	0	0	0	0	0	0	0	0	0
	GS_06431	-	-	-	-	Y		K02984-small subunit ribosomal protein S3Ae	IPR001593-Ribosomal protein S3Ae IPR018281-Ribosomal protein S3Ae, conserved site	Biological Process: translation (GO:0006412), Cellular Component: intracellular (GO:0005622), Cellular Component: ribosome (GO:0005840), Molecular Function: structural constituent of ribosome (GO:0003735)	bmy:Bm1_27225 40S ribosomal protein S3a; K02984 small subunit ribosomal protein S3Ae%243%60.082304526749%2e-75	-	-	-		0	0	0	9	0	0	0	0	0	0	0	0	0	0	0	0	0	0
	GS_07395	-	-	-	-	Y		-	IPR015897-CHK kinase-like IPR012877-Uncharacterised kinase D1044.1	-	sp|Q11177|DHS27_CAEEL%%Uncharacterized oxidoreductase dhs-27 OS=Caenorhabditis elegans GN=dhs-27 PE=2 SV=2%%4.5e-96	-	-	Y		0	0	0	9	0	0	0	0	0	0	0	0	0	0	0	0	0	0
	GS_19270	-	-	-	-	Y		K02908-large subunit ribosomal protein L30e	IPR000231-Ribosomal protein L30e IPR022991-Ribosomal protein L30e, conserved site IPR004038-Ribosomal protein L7Ae/L30e/S12e/Gadd45	Biological Process: translation (GO:0006412), Cellular Component: intracellular (GO:0005622), Cellular Component: ribosome (GO:0005840), Molecular Function: structural constituent of ribosome (GO:0003735)	bmy:Bm1_33220 60S ribosomal protein L30; K02908 large subunit ribosomal protein L30e%112%95.5357142857143%3e-57	-	-	-		0	0	0	9	0	0	0	0	0	0	0	0	0	0	0	0	0	0
	GS_20227	-	-	-	-	Y		K04043-molecular chaperone DnaK	IPR013126-Heat shock protein 70 IPR001023-Heat shock protein Hsp70 IPR018181-Heat shock protein 70, conserved site IPR012725-Chaperone DnaK	Biological Process: protein folding (GO:0006457), Molecular Function: ATP binding (GO:0005524), Molecular Function: unfolded protein binding (GO:0051082)	Channels and Transporters%gnl|TC-DB|P0A6Y8%1%Channel/pores%1.A.%alpha-type channels%1.A.3% Voltage-gated Ion Channel (VIC) Superfamily .%1.A.33.1.2%" Cation Channel-forming Heat Shock Protein-70 (Hsp70) Family.; Ryanodine-Inositol 1,4,5-triphosphate Receptor Ca2+ Channel (RIR-CaC) Family."%Chaperone protein dnaK - Escherichia coli.%602%58.80398671%0	-	-	Y		0	0	0	9	0	0	0	0	0	0	0	0	0	0	0	0	0	0
	GS_00838	-	-	-	-	Y		K02920-large subunit ribosomal protein L36e	IPR000509-Ribosomal protein L36e	Biological Process: translation (GO:0006412), Cellular Component: intracellular (GO:0005622), Cellular Component: ribosome (GO:0005840), Molecular Function: structural constituent of ribosome (GO:0003735)	bmy:Bm1_16700 60S ribosomal protein L36; K02920 large subunit ribosomal protein L36e%102%85.2941176470588%9e-44	-	-	-		0	0	0	8	0	0	0	0	0	0	0	0	0	0	0	0	0	0
	GS_01284	-	-	-	-	Y		K09494-T-complex protein 1 subunit beta	IPR002194-Chaperonin TCP-1, conserved site IPR002423-Chaperonin Cpn60/TCP-1 IPR017998-Chaperone, tailless complex polypeptide 1 IPR012716-T-complex protein 1, beta subunit	Biological Process: cellular protein metabolic process (GO:0044267), Biological Process: protein folding (GO:0006457), Molecular Function: ATP binding (GO:0005524), Molecular Function: unfolded protein binding (GO:0051082)	bmy:Bm1_10270 T-complex protein 1, beta subunit; K09494 T-complex protein 1 subunit beta%508%84.0551181102362%0.0	-	-	Y		0	0	0	8	0	0	0	0	0	0	0	0	0	0	0	0	0	0
	GS_02253	-	-	-	-	Y		-	IPR002068-Heat shock protein Hsp20 IPR008978-HSP20-like chaperone	-	bmy:Bm1_07160 Hsp20/alpha crystallin family protein%136%63.9705882352941%7e-43	-	-	-		0	0	0	8	0	0	0	0	0	0	0	0	0	0	0	0	0	0
	GS_04866	-	-	-	-	Y		K02901-large subunit ribosomal protein L27e	IPR014722-Translation protein SH3-like, subgroup IPR001141-Ribosomal protein L27e IPR018262-Ribosomal protein L27e, conserved site IPR005824-KOW	Biological Process: translation (GO:0006412), Cellular Component: intracellular (GO:0005622), Cellular Component: ribosome (GO:0005840), Molecular Function: structural constituent of ribosome (GO:0003735)	bmy:Bm1_28975 60S ribosomal protein L27; K02901 large subunit ribosomal protein L27e%136%84.5588235294118%4e-61	-	-	-		0	0	0	8	0	0	0	0	0	0	0	0	0	0	0	0	0	0
	GS_06295	-	-	-	-	Y		K01900-succinyl-CoA synthetase beta subunit	IPR005809-Succinyl-CoA synthetase, beta subunit IPR016102-Succinyl-CoA synthetase-like IPR013816-ATP-grasp fold, subdomain 2 IPR005811-ATP-citrate lyase/succinyl-CoA ligase IPR013815-ATP-grasp fold, subdomain 1 IPR013650-ATP-grasp fold, succinyl-CoA synthetase-type IPR017866-Succinyl-CoA synthetase, beta subunit, conserved site	Biological Process: metabolic process (GO:0008152), Molecular Function: ATP binding (GO:0005524), Molecular Function: catalytic activity (GO:0003824), Molecular Function: ligase activity (GO:0016874)	sp|C5D8V2|SUCC_GEOSW%%Succinyl-CoA ligase [ADP-forming] subunit beta OS=Geobacillus sp. (strain WCH70) GN=sucC PE=3 SV=1%%2.3e-185	-	-	Y		0	0	0	8	0	0	0	0	0	0	0	0	0	0	0	0	0	0
	GS_09738	-	-	-	-	Y		K02885-large subunit ribosomal protein L19e	IPR015974-Ribosomal protein L19/L19e, domain 3 IPR015972-Ribosomal protein L19/L19e, domain 1 IPR000196-Ribosomal protein L19/L19e IPR023638-Ribosomal protein L19/L19e conserved site	Biological Process: translation (GO:0006412), Cellular Component: intracellular (GO:0005622), Cellular Component: ribosome (GO:0005840), Molecular Function: structural constituent of ribosome (GO:0003735)	bmy:Bm1_34025 60S ribosomal protein L19; K02885 large subunit ribosomal protein L19e%208%90.3846153846154%3e-99	-	-	-		0	0	0	8	0	0	0	0	0	0	0	0	0	0	0	0	0	0
	GS_10132	-	-	-	-	Y		K12670-oligosaccharyltransferase complex subunit beta	IPR005013-Oligosaccharyl transferase complex, subunit Wbp1	Biological Process: protein N-linked glycosylation via asparagine (GO:0018279), Cellular Component: endoplasmic reticulum membrane (GO:0005789), Molecular Function: dolichyl-diphosphooligosaccharide-protein glycotransferase activity (GO:0004579)	bmy:Bm1_31915 Dolichyl-diphosphooligosaccharide--protein glycosyltransferase 48 kDasubunit precursor; K12670 oligosaccharyltransferase complex subunit beta%426%75.3521126760563%0.0	Y	-	-		0	0	0	8	0	0	0	0	0	0	0	0	0	0	0	0	0	0
	GS_10343	-	-	-	-	Y		K02870-large subunit ribosomal protein L12e	IPR020785-Ribosomal protein L11, conserved site IPR020784-Ribosomal protein L11, N-terminal IPR020783-Ribosomal protein L11, C-terminal domain IPR000911-Ribosomal protein L11	Biological Process: translation (GO:0006412), Cellular Component: ribosome (GO:0005840), Molecular Function: structural constituent of ribosome (GO:0003735)	bmy:Bm1_07030 60S ribosomal protein L12; K02870 large subunit ribosomal protein L12e%165%93.3333333333333%1e-85	-	-	-		0	0	0	8	0	0	0	0	0	0	0	0	0	0	0	0	0	0
	GS_16036	-	-	-	-	Y		K03951-NADH dehydrogenase (ubiquinone) 1 alpha subcomplex 7	IPR009947-NADH:ubiquinone oxidoreductase subunit B14.5a	Biological Process: ATP synthesis coupled electron transport (GO:0042773), Cellular Component: mitochondrial inner membrane (GO:0005743), Molecular Function: NADH dehydrogenase (ubiquinone) activity (GO:0008137)	Channels and Transporters%gnl|TC-DB|Q05752%3%Primary active transporters%3.D.%Oxidoreduction-driven transporters%3.D.1%Oxidoreduction-driven transporters%3.D.1.6.1% H+ or Na+-translocating NADH Dehydrogenase (NDH) Family.%NADH dehydrogenase [ubiquinone] 1 alpha subcomplex subunit 7 - Bos taurus (Bovine).%36%58.33333333%2.00E-06	-	-	-		0	0	0	8	0	0	0	0	0	0	0	0	0	0	0	0	0	0
	GS_16972	-	-	-	-	Y		K09584-protein disulfide-isomerase A6	IPR005746-Thioredoxin IPR005788-Disulphide isomerase IPR017936-Thioredoxin-like IPR012335-Thioredoxin fold IPR017937-Thioredoxin, conserved site IPR012336-Thioredoxin-like fold IPR013766-Thioredoxin domain	Biological Process: cell redox homeostasis (GO:0045454), Biological Process: glycerol ether metabolic process (GO:0006662), Molecular Function: electron carrier activity (GO:0009055), Molecular Function: isomerase activity (GO:0016853), Molecular Function: protein disulfide oxidoreductase activity (GO:0015035)	bmy:Bm1_33495 Probable protein disulfide isomerase A6 precursor, putative; K09584 protein disulfide-isomerase A6 [EC:5.3.4.1]%369%63.6856368563686%1e-135	-	-	Y		0	0	0	8	0	0	0	0	0	0	0	0	0	0	0	0	0	0
	GS_17447	-	-	-	-	Y		K02133-F-type H+-transporting ATPase subunit beta	IPR004100-ATPase, F1/V1/A1 complex, alpha/beta subunit, N-terminal IPR000793-ATPase, F1/V1/A1 complex, alpha/beta subunit, C-terminal IPR005722-ATPase, F1 complex, beta subunit IPR020003-ATPase, alpha/beta subunit, nucleotide-binding domain, active site IPR018118-ATPase, F1/A1 complex, alpha/beta subunit, N-terminal IPR000194-ATPase, alpha/beta subunit, nucleotide-binding domain IPR003593-ATPase,…	Biological Process: ATP hydrolysis coupled proton transport (GO:0015991), Biological Process: ATP metabolic process (GO:0046034), Biological Process: ATP synthesis coupled proton transport (GO:0015986), Biological Process: proton transport (GO:0015992), Cellular Component: proton-transporting ATP synthase complex, catalytic core F(1) (GO:0045261), Cellular Component: proton-transporting two-secto…	Channels and Transporters%gnl|TC-DB|P00830%3%Primary active transporters%3.A.%P-P-bond-hydrolysis-driven transporters%3.A.2%" H+- or Na+-translocating F-type, V-type and A-type ATPase (F-ATPase) Superfamily."%3.A.2.1.3%" H+- or Na+-translocating F-type, V-type and A-type ATPase (F-ATPase) Superfamily."%"ATP SYNTHASE BETA CHAIN, MITOCHONDRIAL PRECURSOR (EC 3.6.1.34) - Saccharomyces cerevisiae (Bak…	-	-	Y		0	0	0	8	0	0	0	0	0	0	0	0	0	0	0	0	0	0
	GS_19959	-	-	-	-	Y		K05236-coatomer protein complex, subunit alpha (xenin)	IPR015943-WD40/YVTN repeat-like-containing domain IPR019781-WD40 repeat, subgroup IPR020472-G-protein beta WD-40 repeat IPR017986-WD40-repeat-containing domain IPR010714-Coatomer, alpha subunit, C-terminal IPR019775-WD40 repeat, conserved site IPR019782-WD40 repeat 2 IPR011046-WD40 repeat-like-containing domain IPR001680-WD40 repeat IPR006692-Coatomer, WD associated region	Biological Process: intracellular protein transport (GO:0006886), Biological Process: vesicle-mediated transport (GO:0016192), Cellular Component: COPI vesicle coat (GO:0030126), Cellular Component: membrane coat (GO:0030117), Molecular Function: protein binding (GO:0005515), Molecular Function: structural molecule activity (GO:0005198)	Channels and Transporters%gnl|TC-DB|O00628%3%Primary active transporters%3.A.%P-P-bond-hydrolysis-driven transporters%3.A.2%" H+- or Na+-translocating F-type, V-type and A-type ATPase (F-ATPase) Superfamily."%3.A.20.1.1%" H+- or Na+-translocating F-type, V-type and A-type ATPase (F-ATPase) Superfamily.; Peroxisomal Protein Importer (PPI) Family."%Peroxisomal targeting signal 2 receptor OS=Homo sa…	-	-	Y		0	0	0	8	0	0	0	0	0	0	0	0	0	0	0	0	0	0
	GS_23087	-	-	-	-	Y		-	IPR001107-Band 7 protein IPR000163-Prohibitin	Cellular Component: membrane (GO:0016020)	sp|P50093|PHB2_CAEEL%%Mitochondrial prohibitin complex protein 2 OS=Caenorhabditis elegans GN=phb-2 PE=1 SV=2%%3.3e-97	-	Y	-		0	0	0	8	0	0	0	0	0	0	0	0	0	0	0	0	0	0
	GS_00687	-	-	-	-	Y		K04077-chaperonin GroEL	IPR002423-Chaperonin Cpn60/TCP-1 IPR001844-Chaperonin Cpn60 IPR018370-Chaperonin Cpn60, conserved site	Biological Process: cellular protein metabolic process (GO:0044267), Biological Process: protein folding (GO:0006457), Biological Process: protein refolding (GO:0042026), Cellular Component: cytoplasm (GO:0005737), Molecular Function: ATP binding (GO:0005524)	cel:Y22D7AL.5 hsp-60; Heat Shock Protein family member (hsp-60); K04077 chaperonin GroEL%546%74.5421245421245%0.0	-	Y	Y		0	0	0	7	0	0	0	0	0	0	0	0	0	0	0	0	0	0
	GS_03398	-	-	-	-	Y		K02155-V-type H+-transporting ATPase 16kDa proteolipid subunit	IPR002379-ATPase, F0/V0 complex, subunit C IPR011555-ATPase, V0 complex, proteolipid subunit C, eukaryotic IPR000245-ATPase, V0 complex, proteolipid subunit C	Biological Process: ATP hydrolysis coupled proton transport (GO:0015991), Cellular Component: proton-transporting two-sector ATPase complex, proton-transporting domain (GO:0033177), Cellular Component: proton-transporting V-type ATPase, V0 domain (GO:0033179), Molecular Function: hydrogen ion transmembrane transporter activity (GO:0015078)	Channels and Transporters%gnl|TC-DB|P23380%9%Incompletely characterized transport systems%9.B.%Putative transport proteins%9.B.1% Metal Homeostasis Protein (MHP) Family.%9.B.16.1.1% Metal Homeostasis Protein (MHP) Family.; Putative Ductin Channel (Ductin) Family.%Vacuolar ATP synthase 16 kDa proteolipid subunit (EC 3.6.3.14) (Ductin) (VHA16K) - Drosophila melanogaster (Fruit fly).%155%61.29032258…	Y	-	Y		0	0	0	7	0	0	0	0	0	0	0	0	0	0	0	0	0	0
	GS_04134	-	-	-	-	Y		K02949-small subunit ribosomal protein S11e	IPR016027-Nucleic acid-binding, OB-fold-like IPR000266-Ribosomal protein S17 IPR012340-Nucleic acid-binding, OB-fold IPR019979-Ribosomal protein S17, conserved site	Biological Process: translation (GO:0006412), Cellular Component: intracellular (GO:0005622), Cellular Component: ribosome (GO:0005840), Molecular Function: structural constituent of ribosome (GO:0003735)	bmy:Bm1_33760 40S ribosomal protein S11; K02949 small subunit ribosomal protein S11e%206%68.9320388349515%2e-71	-	-	-		0	0	0	7	0	0	0	0	0	0	0	0	0	0	0	0	0	0
	GS_08437	-	-	-	-	Y		K02910-large subunit ribosomal protein L31e	IPR020052-Ribosomal protein L31e, conserved site IPR000054-Ribosomal protein L31e IPR023621-Ribosomal protein L31e domain	Biological Process: translation (GO:0006412), Cellular Component: intracellular (GO:0005622), Cellular Component: ribosome (GO:0005840), Molecular Function: structural constituent of ribosome (GO:0003735)	bmy:Bm1_49585 60S ribosomal protein L31; K02910 large subunit ribosomal protein L31e%127%77.1653543307087%3e-51	-	-	-		0	0	0	7	0	0	0	0	0	0	0	0	0	0	0	0	0	0
	GS_08513	-	-	-	-	Y		K05765-cofilin	IPR002108-Actin-binding, cofilin/tropomyosin type	Cellular Component: intracellular (GO:0005622), Molecular Function: actin binding (GO:0003779)	bmy:Bm1_22990 actin-depolymerizing factor 1; K05765 cofilin%144%88.8888888888889%6e-66	-	-	-		0	0	0	7	0	0	0	0	0	0	0	0	0	0	0	0	0	0
	GS_08708	-	-	-	-	Y		-	IPR017940-ABC transporter, integral membrane type 1 IPR011527-ABC transporter, transmembrane domain, type 1 IPR001140-ABC transporter, transmembrane domain IPR003439-ABC transporter-like IPR003593-ATPase, AAA+ type, core IPR017871-ABC transporter, conserved site	Biological Process: transmembrane transport (GO:0055085), Biological Process: transport (GO:0006810), Cellular Component: integral to membrane (GO:0016021), Molecular Function: ATP binding (GO:0005524), Molecular Function: ATPase activity (GO:0016887), Molecular Function: ATPase activity, coupled to transmembrane movement of substances (GO:0042626), Molecular Function: nucleoside-triphosphatase a…	Channels and Transporters%gnl|TC-DB|P33527%3%Primary active transporters%3.A.%P-P-bond-hydrolysis-driven transporters%3.A.1% ATP-binding Cassette (ABC) Superfamily.%3.A.1.208.8% ATP-binding Cassette (ABC) Superfamily.%Multidrug resistance-associated protein 1 - Homo sapiens (Human).%863%52.60718424%0	Y	-	-		0	0	0	7	0	0	0	0	0	0	0	0	0	0	0	0	0	0
	GS_10860	-	-	-	-	Y		K03943-NADH dehydrogenase (ubiquinone) flavoprotein 2	IPR002023-NADH:ubiquinone oxidoreductase, 24kDa subunit IPR012335-Thioredoxin fold IPR012336-Thioredoxin-like fold	Biological Process: oxidation-reduction process (GO:0055114), Molecular Function: NAD binding (GO:0051287), Molecular Function: oxidoreductase activity (GO:0016491)	Channels and Transporters%gnl|TC-DB|P04394%3%Primary active transporters%3.D.%Oxidoreduction-driven transporters%3.D.1%Oxidoreduction-driven transporters%3.D.1.6.1% H+ or Na+-translocating NADH Dehydrogenase (NDH) Family.%"NADH dehydrogenase [ubiquinone] flavoprotein 2, mitochondrial - Bos taurus (Bovine)."%225%69.77777778%2.00E-95	-	-	Y		0	0	0	7	0	0	0	0	0	0	0	0	0	0	0	0	0	0
	GS_12376	-	-	-	-	Y		K02934-large subunit ribosomal protein L6e	IPR000915-Ribosomal protein L6E IPR014722-Translation protein SH3-like, subgroup	Biological Process: translation (GO:0006412), Cellular Component: intracellular (GO:0005622), Cellular Component: ribosome (GO:0005840), Molecular Function: structural constituent of ribosome (GO:0003735)	bmy:Bm1_45400 60S ribosomal protein L6; K02934 large subunit ribosomal protein L6e%230%75.6521739130435%8e-95	-	-	-		0	0	0	7	0	0	0	0	0	0	0	0	0	0	0	0	0	0
	GS_12627	-	-	-	-	Y		-	IPR011037-Pyruvate kinase-like, insert domain IPR005302-Molybdenum cofactor sulfurase, C-terminal IPR005303-MOSC, N-terminal beta barrel	Molecular Function: catalytic activity (GO:0003824), Molecular Function: molybdenum ion binding (GO:0030151), Molecular Function: pyridoxal phosphate binding (GO:0030170)	sp|B0Y691|MOCOS_ASPFC%%Molybdenum cofactor sulfurase OS=Aspergillus fumigatus (strain CEA10 / CBS 144.89 / FGSC A1163) GN=hxB PE=3 SV=1%%3.6e-114	Y	-	Y		0	0	0	7	0	0	0	0	0	0	0	0	0	0	0	0	0	0
	GS_13250	-	-	-	-	Y		K02123-V-type H+-transporting ATPase subunit I	IPR002490-ATPase, V0/A0 complex, 116kDa subunit	Biological Process: ATP hydrolysis coupled proton transport (GO:0015991), Cellular Component: proton-transporting two-sector ATPase complex, proton-transporting domain (GO:0033177), Molecular Function: hydrogen ion transmembrane transporter activity (GO:0015078)	Channels and Transporters%gnl|TC-DB|Q9HBG4%3%Primary active transporters%3.A.%P-P-bond-hydrolysis-driven transporters%3.A.2%" H+- or Na+-translocating F-type, V-type and A-type ATPase (F-ATPase) Superfamily."%3.A.2.2.4%" H+- or Na+-translocating F-type, V-type and A-type ATPase (F-ATPase) Superfamily."%Vacuolar proton translocating ATPase 116 kDa subunit a isoform 4 - Homo sapiens (Human).%539%47…	Y	-	Y		0	0	0	7	0	0	0	0	0	0	0	0	0	0	0	0	0	0
	GS_15610	-	-	-	-	Y		K03962-NADH dehydrogenase (ubiquinone) 1 beta subcomplex 6	IPR019174-NADH dehydrogenase 1, beta subcomplex, subunit 6	-	ZK809.3%CE03831 WBGene00014086 status:Confirmed UniProt:Q23597_CAEEL protein_id:CAA92637.1%HMM_hit%7e-139	-	-	-		0	0	0	7	0	0	0	0	0	0	0	0	0	0	0	0	0	0
	GS_18061	-	-	-	-	Y		-	IPR005097-Saccharopine dehydrogenase / Homospermidine synthase IPR016040-NAD(P)-binding domain	Molecular Function: binding (GO:0005488)	bmy:Bm1_50930 AT14148p%418%61.9617224880383%1e-160	Y	-	-		0	0	0	7	0	0	0	0	0	0	0	0	0	0	0	0	0	0
	GS_18784	-	-	-	-	Y		K02981-small subunit ribosomal protein S2e	IPR018192-Ribosomal protein S5, N-terminal, conserved site IPR014721-Ribosomal protein S5 domain 2-type fold, subgroup IPR005711-Ribosomal protein S5, eukaryotic/archaeal IPR013810-Ribosomal protein S5, N-terminal IPR014720-Double-stranded RNA-binding-like IPR005324-Ribosomal protein S5, C-terminal IPR020568-Ribosomal protein S5 domain 2-type fold IPR000851-Ribosomal protein S5	Biological Process: translation (GO:0006412), Cellular Component: intracellular (GO:0005622), Cellular Component: ribosome (GO:0005840), Cellular Component: small ribosomal subunit (GO:0015935), Molecular Function: RNA binding (GO:0003723), Molecular Function: structural constituent of ribosome (GO:0003735)	bmy:Bm1_39350 40S ribosomal protein S2; K02981 small subunit ribosomal protein S2e%241%89.2116182572614%1e-119	-	-	-		0	0	0	7	0	0	0	0	0	0	0	0	0	0	0	0	0	0
	GS_01772	-	-	-	-	Y		K15734-all-trans-retinol dehydrogenase (NAD+)	IPR002198-Short-chain dehydrogenase/reductase SDR IPR020904-Short-chain dehydrogenase/reductase, conserved site IPR002347-Glucose/ribitol dehydrogenase IPR016040-NAD(P)-binding domain IPR020842-Polyketide synthase/Fatty acid synthase, KR	Biological Process: metabolic process (GO:0008152), Biological Process: oxidation-reduction process (GO:0055114), Molecular Function: binding (GO:0005488), Molecular Function: oxidoreductase activity (GO:0016491)	cel:T02E1.5 dhs-3; DeHydrogenases, Short chain family member (dhs-3)%289%60.5536332179931%4e-96	-	-	Y		0	0	0	6	0	0	0	0	0	0	0	0	0	0	0	0	0	0
	GS_01957	-	-	-	-	Y		K03949-NADH dehydrogenase (ubiquinone) 1 alpha subcomplex 5	IPR006806-ETC complex I subunit	Biological Process: respiratory electron transport chain (GO:0022904), Cellular Component: mitochondrial inner membrane (GO:0005743), Molecular Function: oxidoreductase activity, acting on NADH or NADPH (GO:0016651)	Channels and Transporters%gnl|TC-DB|P23935%3%Primary active transporters%3.D.%Oxidoreduction-driven transporters%3.D.1%Oxidoreduction-driven transporters%3.D.1.6.1% H+ or Na+-translocating NADH Dehydrogenase (NDH) Family.%NADH dehydrogenase [ubiquinone] 1 alpha subcomplex subunit 5 - Bos taurus (Bovine).%114%56.14035088%4.00E-33	-	-	-		0	0	0	6	0	0	0	0	0	0	0	0	0	0	0	0	0	0
	GS_02635	-	-	-	-	Y		K07874-Ras-related protein Rab-1A	IPR020851-Small GTPase IPR001806-Ras GTPase IPR006688-ADP-ribosylation factor IPR013753-Ras IPR002041-Ran GTPase IPR003579-Ras small GTPase, Rab type IPR003578-Small GTPase, Rho type IPR003577-Ras small GTPase, Ras type IPR005225-Small GTP-binding protein domain	Biological Process: GTP catabolic process (GO:0006184), Biological Process: intracellular protein transport (GO:0006886), Biological Process: nucleocytoplasmic transport (GO:0006913), Biological Process: protein transport (GO:0015031), Biological Process: signal transduction (GO:0007165), Biological Process: small GTPase mediated signal transduction (GO:0007264), Cellular Component: intracellular…	GTPase%rab_1 %197%90.8629441624365%1e-107	-	-	-		0	0	0	6	0	0	0	0	0	0	0	0	0	0	0	0	0	0
	GS_03956	-	-	-	-	Y		K02925-large subunit ribosomal protein L3e	IPR009000-Translation elongation/initiation factor/Ribosomal, beta-barrel IPR019926-Ribosomal protein L3, conserved site IPR000597-Ribosomal protein L3	Biological Process: translation (GO:0006412), Cellular Component: intracellular (GO:0005622), Cellular Component: ribosome (GO:0005840), Molecular Function: structural constituent of ribosome (GO:0003735)	bmy:Bm1_13895 60S ribosomal protein L3; K02925 large subunit ribosomal protein L3e%439%84.2824601366743%0.0	Y	-	-		0	0	0	6	0	0	0	0	0	0	0	0	0	0	0	0	0	0
	GS_07343	-	-	-	-	Y		K11352-NADH dehydrogenase (ubiquinone) 1 alpha subcomplex 12	IPR007763-NADH:ubiquinone oxidoreductase, 17.2kDa subunit	Cellular Component: membrane (GO:0016020), Molecular Function: electron carrier activity (GO:0009055), Molecular Function: NADH dehydrogenase (ubiquinone) activity (GO:0008137)	Channels and Transporters%gnl|TC-DB|O97725%3%Primary active transporters%3.D.%Oxidoreduction-driven transporters%3.D.1%Oxidoreduction-driven transporters%3.D.1.6.1% H+ or Na+-translocating NADH Dehydrogenase (NDH) Family.%NADH dehydrogenase [ubiquinone] 1 alpha subcomplex subunit 12 - Bos taurus (Bovine).%137%43.06569343%4.00E-27	-	-	-		0	0	0	6	0	0	0	0	0	0	0	0	0	0	0	0	0	0
	GS_12245	-	-	-	-	Y		-	-	-	Hypothetical protein	-	-	-		0	0	0	6	0	0	0	0	0	0	0	0	0	0	0	0	0	0
	GS_12683	-	-	-	-	Y		K02873-large subunit ribosomal protein L13e	IPR001380-Ribosomal protein L13e	Biological Process: translation (GO:0006412), Cellular Component: intracellular (GO:0005622), Cellular Component: ribosome (GO:0005840), Molecular Function: structural constituent of ribosome (GO:0003735)	bmy:Bm1_47775 60S ribosomal protein L13; K02873 large subunit ribosomal protein L13e%213%64.3192488262911%1e-65	-	-	-		0	0	0	6	0	0	0	0	0	0	0	0	0	0	0	0	0	0
	GS_13000	-	-	-	-	Y		K13250-translocon-associated protein subunit beta	IPR008856-Translocon-associated beta	Cellular Component: endoplasmic reticulum (GO:0005783), Cellular Component: integral to membrane (GO:0016021)	bmy:Bm1_38885 signal sequence receptor beta-like protein; K13250 translocon-associated protein subunit beta%190%74.7368421052632%1e-79	Y	-	-		0	0	0	6	0	0	0	0	0	0	0	0	0	0	0	0	0	0
	GS_15975	-	-	-	-	Y		K02875-large subunit ribosomal protein L14e	IPR002784-Ribosomal protein L14 IPR014722-Translation protein SH3-like, subgroup	Biological Process: translation (GO:0006412), Cellular Component: intracellular (GO:0005622), Cellular Component: ribosome (GO:0005840), Molecular Function: structural constituent of ribosome (GO:0003735)	bmy:Bm1_09490 60S ribosomal protein L14; K02875 large subunit ribosomal protein L14e%138%81.8840579710145%4e-61	-	-	-		0	0	0	6	0	0	0	0	0	0	0	0	0	0	0	0	0	0
	GS_19124	-	-	-	-	Y		-	IPR023631-Amidase signature domain IPR020556-Amidase, conserved site IPR000120-Amidase	Molecular Function: carbon-nitrogen ligase activity, with glutamine as amido-N-donor (GO:0016884)	bmy:Bm1_28250 amidase (EC:3.1.-.-)%487%55.4414784394251%1e-152	Y	-	Y		0	0	0	6	0	0	0	0	0	0	0	0	0	0	0	0	0	0
	GS_19299	-	-	-	-	Y		K11152-retinol dehydrogenase 11	IPR002198-Short-chain dehydrogenase/reductase SDR IPR002347-Glucose/ribitol dehydrogenase IPR016040-NAD(P)-binding domain	Biological Process: metabolic process (GO:0008152), Biological Process: oxidation-reduction process (GO:0055114), Molecular Function: binding (GO:0005488), Molecular Function: oxidoreductase activity (GO:0016491)	bmy:Bm1_24195 oxidoreductase, short chain dehydrogenase/reductase family protein%318%51.2578616352201%6e-82	Y	-	-		0	0	0	6	0	0	0	0	0	0	0	0	0	0	0	0	0	0
	GS_23107	-	-	-	-	Y		-	IPR006621-Nose resistant-to-fluoxetine protein, N-terminal IPR002656-Acyltransferase 3	Molecular Function: transferase activity, transferring acyl groups other than amino-acyl groups (GO:0016747)	Channels and Transporters%gnl|TC-DB|O45283%9%Incompletely characterized transport systems%9.B.%Putative transport proteins%9.B.9% Urate Transporter (UAT) Family.%9.B.97.2.1% Acyltransferase-3/Putative Acetyl-CoA Transporter (ATAT) Family.; Urate Transporter (UAT) Family.%"Protein C31A11.7, partially confirmed by transcript evidence OS=Caenorhabditis elegans GN=oac-7 PE=2 SV=3"%386%34.71502591%3.0…	Y	-	-		0	0	0	6	0	0	0	0	0	0	0	0	0	0	0	0	0	0
	GS_03281	-	-	-	-	Y		K00699-glucuronosyltransferase	IPR002213-UDP-glucuronosyl/UDP-glucosyltransferase	Biological Process: metabolic process (GO:0008152), Molecular Function: transferase activity, transferring hexosyl groups (GO:0016758)	cel:F39G3.1 ugt-61; UDP-GlucuronosylTransferase family member (ugt-61); K00699 glucuronosyltransferase [EC:2.4.1.17]%400%51.5%1e-118	Y	-	Y		0	0	0	5	0	0	0	0	0	0	0	0	0	0	0	0	0	0
	GS_03436	-	-	-	-	Y		K03386-peroxiredoxin (alkyl hydroperoxide reductase subunit C)	IPR017936-Thioredoxin-like IPR012335-Thioredoxin fold IPR019479-Peroxiredoxin, C-terminal IPR000866-Alkyl hydroperoxide reductase subunit C/ Thiol specific antioxidant IPR012336-Thioredoxin-like fold	Biological Process: cell redox homeostasis (GO:0045454), Molecular Function: antioxidant activity (GO:0016209), Molecular Function: oxidoreductase activity (GO:0016491), Molecular Function: peroxiredoxin activity (GO:0051920)	cel:R07E5.2 prdx-3; PeRoxireDoXin family member (prdx-3); K03386 peroxiredoxin (alkyl hydroperoxide reductase subunit C) [EC:1.11.1.15]%223%73.542600896861%4e-95	-	Y	Y		0	0	0	5	0	0	0	0	0	0	0	0	0	0	0	0	0	0
	GS_06009	-	-	-	-	Y		K07509-acetyl-CoA acyltransferase	IPR020616-Thiolase, N-terminal IPR020615-Thiolase, acyl-enzyme intermediate active site IPR016039-Thiolase-like IPR002155-Thiolase IPR020613-Thiolase, conserved site IPR020617-Thiolase, C-terminal IPR016038-Thiolase-like, subgroup	Biological Process: metabolic process (GO:0008152), Molecular Function: catalytic activity (GO:0003824), Molecular Function: transferase activity, transferring acyl groups other than amino-acyl groups (GO:0016747)	sp|Q99JY0|ECHB_MOUSE%%Trifunctional enzyme subunit beta, mitochondrial OS=Mus musculus GN=Hadhb PE=1 SV=1%%9.1e-184	-	Y	Y		0	0	0	5	0	0	0	0	0	0	0	0	0	0	0	0	0	0
	GS_07144	-	-	-	-	Y		K07877-Ras-related protein Rab-2A	IPR020851-Small GTPase IPR001806-Ras GTPase IPR013753-Ras IPR002041-Ran GTPase IPR003579-Ras small GTPase, Rab type IPR003578-Small GTPase, Rho type IPR003577-Ras small GTPase, Ras type IPR005225-Small GTP-binding protein domain	Biological Process: GTP catabolic process (GO:0006184), Biological Process: intracellular protein transport (GO:0006886), Biological Process: nucleocytoplasmic transport (GO:0006913), Biological Process: protein transport (GO:0015031), Biological Process: signal transduction (GO:0007165), Biological Process: small GTPase mediated signal transduction (GO:0007264), Cellular Component: intracellular…	GTPase%unc_108 %191%97.9057591623037%1e-112	-	-	-		0	0	0	5	0	0	0	0	0	0	0	0	0	0	0	0	0	0
	GS_07943	-	-	-	-	Y		K02991-small subunit ribosomal protein S6e	IPR018282-Ribosomal protein S6e, conserved site IPR001377-Ribosomal protein S6e	Biological Process: translation (GO:0006412), Cellular Component: intracellular (GO:0005622), Cellular Component: ribosome (GO:0005840), Molecular Function: structural constituent of ribosome (GO:0003735)	bmy:Bm1_50740 40S ribosomal protein S6; K02991 small subunit ribosomal protein S6e%248%92.741935483871%1e-122	-	-	-		0	0	0	5	0	0	0	0	0	0	0	0	0	0	0	0	0	0
	GS_08507	-	-	-	-	Y		-	IPR011237-Peptidase M16, core IPR007863-Peptidase M16, C-terminal IPR011765-Peptidase M16, N-terminal IPR011249-Metalloenzyme, LuxS/M16 peptidase-like, metal-binding	Biological Process: proteolysis (GO:0006508), Molecular Function: catalytic activity (GO:0003824), Molecular Function: metal ion binding (GO:0046872), Molecular Function: metalloendopeptidase activity (GO:0004222), Molecular Function: zinc ion binding (GO:0008270)	cbr:CBG08976 Cbr-ucr-1; C. briggsae CBR-UCR-1 protein%485%52.1649484536083%1e-144	Y	-	Y		0	0	0	5	0	0	0	0	0	0	0	0	0	0	0	0	0	0
	GS_09997	-	-	-	-	Y		-	IPR012816-Conserved hypothetical protein CHP02464	-	sp|P34438|YL58_CAEEL%%Uncharacterized protein F44E2.8 OS=Caenorhabditis elegans GN=F44E2.8 PE=2 SV=2%%1.3e-95	-	-	-		0	0	0	5	0	0	0	0	0	0	0	0	0	0	0	0	0	0
	GS_12623	-	-	-	-	Y		K00699-glucuronosyltransferase	IPR002213-UDP-glucuronosyl/UDP-glucosyltransferase	Biological Process: metabolic process (GO:0008152), Molecular Function: transferase activity, transferring hexosyl groups (GO:0016758)	cel:M88.1 ugt-62; UDP-GlucuronosylTransferase family member (ugt-62); K00699 glucuronosyltransferase [EC:2.4.1.17]%411%47.9318734793187%1e-114	Y	-	-		0	0	0	5	0	0	0	0	0	0	0	0	0	0	0	0	0	0
	GS_14708	-	-	-	-	Y		K00693-glycogen(starch) synthase	IPR008631-Glycogen synthase	Biological Process: glycogen biosynthetic process (GO:0005978), Molecular Function: glycogen (starch) synthase activity (GO:0004373)	cbr:CBG18401 Cbr-gsy-1; C. briggsae CBR-GSY-1 protein; K00693 glycogen(starch) synthase [EC:2.4.1.11]%677%64.9926144756278%0.0	-	-	Y		0	0	0	5	0	0	0	0	0	0	0	0	0	0	0	0	0	0
	GS_14811	-	-	-	-	Y		K00669-arylalkylamine N-acetyltransferase	IPR016181-Acyl-CoA N-acyltransferase	-	M7.12%CE37394 WBGene00010887 status:Partially_confirmed UniProt:Q21596_CAEEL protein_id:CAA92749.2%HMM_hit%6.4e-84	-	-	Y		0	0	0	5	0	0	0	0	0	0	0	0	0	0	0	0	0	0
	GS_15291	-	-	-	-	Y		K02896-large subunit ribosomal protein L24e	IPR023441-Ribosomal protein L24e domain IPR011017-TRASH IPR000988-Ribosomal protein L24e	Biological Process: translation (GO:0006412), Cellular Component: ribosome (GO:0005840), Molecular Function: structural constituent of ribosome (GO:0003735)	bmy:Bm1_06190 60S ribosomal protein L24 (L30); K02896 large subunit ribosomal protein L24e%160%82.5%1e-71	-	-	-		0	0	0	5	0	0	0	0	0	0	0	0	0	0	0	0	0	0
	GS_17294	-	-	-	-	Y		K00540-NO DESCRIPTION	IPR002198-Short-chain dehydrogenase/reductase SDR IPR020904-Short-chain dehydrogenase/reductase, conserved site IPR002347-Glucose/ribitol dehydrogenase IPR016040-NAD(P)-binding domain	Biological Process: metabolic process (GO:0008152), Biological Process: oxidation-reduction process (GO:0055114), Molecular Function: binding (GO:0005488), Molecular Function: oxidoreductase activity (GO:0016491)	cel:R05D8.8 dhs-14; DeHydrogenases, Short chain family member (dhs-14)%245%40.8163265306122%3e-41	-	-	Y		0	0	0	5	0	0	0	0	0	0	0	0	0	0	0	0	0	0
	GS_17379	-	-	-	-	Y		K05853-Ca2+ transporting ATPase, sarcoplasmic/endoplasmic reticulum	IPR001757-ATPase, P-type, K/Mg/Cd/Cu/Zn/Na/Ca/Na/H-transporter IPR023306-ATPase, cation-transporting, domain N IPR018303-ATPase, P-type phosphorylation site IPR006068-ATPase, P-type cation-transporter, C-terminal IPR023300-ATPase, P-type, cytoplasmic transduction domain A IPR005782-ATPase, P-type, calcium-transporting IPR023298-ATPase, P-type, transmembrane domain IPR023214-HAD-like domain IPR008…	Biological Process: ATP biosynthetic process (GO:0006754), Biological Process: calcium ion transport (GO:0006816), Biological Process: cation transport (GO:0006812), Biological Process: metabolic process (GO:0008152), Cellular Component: integral to membrane (GO:0016021), Cellular Component: membrane (GO:0016020), Molecular Function: ATP binding (GO:0005524), Molecular Function: ATPase activity, …	Channels and Transporters%gnl|TC-DB|P16615%3%Primary active transporters%3.A.%P-P-bond-hydrolysis-driven transporters%3.A.3% P-type ATPase (P-ATPase) Superfamily.%3.A.3.2.7% P-type ATPase (P-ATPase) Superfamily.%"Sarcoplasmic/endoplasmic reticulum calcium ATPase 2 (EC 3.6.3.8) (Calcium pump 2) (SERCA2) (SR Ca(2+)-ATPase 2) (Calcium-transporting ATPase sarcoplasmic reticulum type, slow twitch skel…	Y	-	Y		0	0	0	5	0	0	0	0	0	0	0	0	0	0	0	0	0	0
	GS_17456	-	-	-	-	Y		-	-	-	T25G12.6%CE39962 WBGene00020813 status:Partially_confirmed UniProt:Q22783_CAEEL protein_id:AAC69024.2%HMM_hit%3.9e-129	-	-	Y		0	0	0	5	0	0	0	0	0	0	0	0	0	0	0	0	0	0
	GS_18807	-	-	-	-	Y		K05546-alpha 1,3-glucosidase	IPR000322-Glycoside hydrolase, family 31 IPR017853-Glycoside hydrolase, superfamily IPR011013-Glycoside hydrolase-type carbohydrate-binding	Biological Process: carbohydrate metabolic process (GO:0005975), Molecular Function: carbohydrate binding (GO:0030246), Molecular Function: catalytic activity (GO:0003824), Molecular Function: hydrolase activity, hydrolyzing O-glycosyl compounds (GO:0004553)	bmy:Bm1_51425 Glycosyl hydrolases family 31 protein; K05546 alpha 1,3-glucosidase [EC:3.2.1.84]%908%72.136563876652%0.0	-	Y	-		0	0	0	5	0	0	0	0	0	0	0	0	0	0	0	0	0	0
	GS_19021	-	-	-	-	Y		K05767-IQ motif containing GTPase activating protein	IPR000593-RasGAP protein, C-terminal	Biological Process: small GTPase mediated signal transduction (GO:0007264), Cellular Component: intracellular (GO:0005622), Molecular Function: Ras GTPase activator activity (GO:0005099)	GTPase%pes_7 %357%32.4929971988796%3e-45	-	-	-		0	0	0	5	0	0	0	0	0	0	0	0	0	0	0	0	0	0
	GS_19864	-	-	-	-	Y		-	-	-	K07E12.1a%CE32905 WBGene00000998 locus:dig-1 CAM status:Confirmed UniProt:Q09165 protein_id:AAA50715.2%HMM_hit%1.7e-97	-	-	Y		0	0	0	5	0	0	0	0	0	0	0	0	0	0	0	0	0	0
	GS_20063	-	-	-	-	Y		K11390-citrate lyase subunit beta-like protein	IPR005000-Aldehyde-lyase domain IPR015813-Pyruvate/Phosphoenolpyruvate kinase	Biological Process: cellular aromatic compound metabolic process (GO:0006725), Molecular Function: carbon-carbon lyase activity (GO:0016830), Molecular Function: catalytic activity (GO:0003824)	sp|Q5I0K3|CLYBL_RAT%%Citrate lyase subunit beta-like protein, mitochondrial OS=Rattus norvegicus GN=Clybl PE=2 SV=2%%6.9e-145	-	-	Y		0	0	0	5	0	0	0	0	0	0	0	0	0	0	0	0	0	0
	GS_21877	-	-	-	-	Y		-	IPR011990-Tetratricopeptide-like helical IPR001440-Tetratricopeptide TPR-1 IPR019734-Tetratricopeptide repeat IPR013026-Tetratricopeptide repeat-containing	Molecular Function: binding (GO:0005488), Molecular Function: protein binding (GO:0005515)	bmy:Bm1_07250 TPR Domain containing protein%230%36.9565217391304%3e-28	-	-	-		0	0	0	5	0	0	0	0	0	0	0	0	0	0	0	0	0	0
	GS_23610	-	-	-	-	Y		K03939-NADH dehydrogenase (ubiquinone) Fe-S protein 6	IPR019401-Zinc finger, CHCC-type	-	Channels and Transporters%gnl|TC-DB|P23934%3%Primary active transporters%3.D.%Oxidoreduction-driven transporters%3.D.1%Oxidoreduction-driven transporters%3.D.1.6.1% H+ or Na+-translocating NADH Dehydrogenase (NDH) Family.%"NADH dehydrogenase [ubiquinone] iron-sulfur protein 6, mitochondrial - Bos taurus (Bovine)."%87%55.17241379%2.00E-21	-	-	-		0	0	0	5	0	0	0	0	0	0	0	0	0	0	0	0	0	0
	GS_24070	-	-	-	-	Y		K01634-sphinganine-1-phosphate aldolase	IPR015421-Pyridoxal phosphate-dependent transferase, major region, subdomain 1 IPR002129-Pyridoxal phosphate-dependent decarboxylase IPR015424-Pyridoxal phosphate-dependent transferase, major domain	Biological Process: carboxylic acid metabolic process (GO:0019752), Molecular Function: carboxy-lyase activity (GO:0016831), Molecular Function: catalytic activity (GO:0003824), Molecular Function: pyridoxal phosphate binding (GO:0030170)	bmy:Bm1_31640 Pyridoxal-dependent decarboxylase conserved domain containing protein; K01634 sphinganine-1-phosphate aldolase [EC:4.1.2.27]%571%67.2504378283713%0.0	Y	-	Y		0	0	0	5	0	0	0	0	0	0	0	0	0	0	0	0	0	0
	GS_24356	-	-	-	-	Y		K02953-small subunit ribosomal protein S13e	IPR012606-Ribosomal protein S13/S15, N-terminal IPR000589-Ribosomal protein S15 IPR009068-S15/NS1, RNA-binding	Biological Process: translation (GO:0006412), Cellular Component: intracellular (GO:0005622), Cellular Component: ribosome (GO:0005840), Molecular Function: structural constituent of ribosome (GO:0003735)	bmy:Bm1_18940 40S ribosomal protein S13; K02953 small subunit ribosomal protein S13e%151%99.3377483443709%1e-81	-	-	-		0	0	0	5	0	0	0	0	0	0	0	0	0	0	0	0	0	0
	GS_00403	-	-	-	-	Y		-	IPR011527-ABC transporter, transmembrane domain, type 1 IPR003439-ABC transporter-like IPR003593-ATPase, AAA+ type, core IPR010509-ABC transporter, N-terminal	Biological Process: transmembrane transport (GO:0055085), Biological Process: transport (GO:0006810), Cellular Component: integral to membrane (GO:0016021), Cellular Component: membrane (GO:0016020), Molecular Function: ATP binding (GO:0005524), Molecular Function: ATPase activity (GO:0016887), Molecular Function: ATPase activity, coupled to transmembrane movement of substances (GO:0042626), Mole…	Channels and Transporters%gnl|TC-DB|P28288%3%Primary active transporters%3.A.%P-P-bond-hydrolysis-driven transporters%3.A.1% ATP-binding Cassette (ABC) Superfamily.%3.A.1.203.1% ATP-binding Cassette (ABC) Superfamily.%"ATP-binding cassette, sub-family D, member 3 (70 kDa peroxisomal membrane protein) (PMP70) - Homo sapiens (Human)."%561%25.6684492%9.00E-43	Y	-	-		0	0	0	4	0	0	0	0	0	0	0	0	0	0	0	0	0	0
	GS_01586	-	-	-	-	Y		K00699-glucuronosyltransferase	IPR002213-UDP-glucuronosyl/UDP-glucosyltransferase	Biological Process: metabolic process (GO:0008152), Molecular Function: transferase activity, transferring hexosyl groups (GO:0016758)	cbr:CBG00954 Cbr-ugt-58; C. briggsae CBR-UGT-58 protein; K00699 glucuronosyltransferase [EC:2.4.1.17]%499%55.9118236472946%1e-166	Y	-	Y		0	0	0	4	0	0	0	0	0	0	0	0	0	0	0	0	0	0
	GS_01755	-	-	-	-	Y		K02976-small subunit ribosomal protein S26e	IPR000892-Ribosomal protein S26e	Biological Process: translation (GO:0006412), Cellular Component: intracellular (GO:0005622), Cellular Component: ribosome (GO:0005840), Molecular Function: structural constituent of ribosome (GO:0003735)	cbr:CBG19764 Cbr-rps-26; C. briggsae CBR-RPS-26 protein; K02976 small subunit ribosomal protein S26e%103%88.3495145631068%2e-46	-	-	-		0	0	0	4	0	0	0	0	0	0	0	0	0	0	0	0	0	0
	GS_02196	-	-	-	-	Y		K00826-branched-chain amino acid aminotransferase	IPR001544-Aminotransferase, class IV IPR005786-Branched-chain amino acid aminotransferase II	Biological Process: branched chain family amino acid metabolic process (GO:0009081), Biological Process: metabolic process (GO:0008152), Molecular Function: branched-chain-amino-acid transaminase activity (GO:0004084), Molecular Function: catalytic activity (GO:0003824)	bmy:Bm1_37270 Branched-chain amino acid aminotransferase, cytosolic, putative; K00826 branched-chain amino acid aminotransferase [EC:2.6.1.42]%411%59.6107055961071%1e-148	-	-	Y		0	0	0	4	0	0	0	0	0	0	0	0	0	0	0	0	0	0
	GS_02250	-	-	-	-	Y		-	IPR013816-ATP-grasp fold, subdomain 2 IPR005479-Carbamoyl-phosphate synthetase, large subunit, ATP-binding	Biological Process: metabolic process (GO:0008152), Molecular Function: ATP binding (GO:0005524), Molecular Function: catalytic activity (GO:0003824), Molecular Function: ligase activity (GO:0016874)	cel:D2023.2 pyc-1; PYruvate Carboxylase family member (pyc-1); K01958 pyruvate carboxylase [EC:6.4.1.1]%95%84.2105263157895%1e-40	-	-	-		0	0	0	4	0	0	0	0	0	0	0	0	0	0	0	0	0	0
	GS_03251	-	-	-	-	Y		K03784-purine-nucleoside phosphorylase	IPR010059-Uridine phosphorylase, eukaryotic IPR018017-Nucleoside phosphorylase IPR000845-Nucleoside phosphorylase domain	Biological Process: nucleoside metabolic process (GO:0009116), Biological Process: nucleotide catabolic process (GO:0009166), Cellular Component: cytoplasm (GO:0005737), Molecular Function: catalytic activity (GO:0003824), Molecular Function: uridine phosphorylase activity (GO:0004850)	Phosphatase%RPTP%ZK783.2%locus:upp-1%212%60.377358490566%1e-71	-	-	-		0	0	0	4	0	0	0	0	0	0	0	0	0	0	0	0	0	0
	GS_03967	-	-	-	-	Y		K07588-LAO/AO transport system kinase	IPR005129-ArgK protein	-	cel:T02G5.13 mmaa-1; MethylMalonic Aciduria type A protein family member (mmaa-1); K07588 LAO/AO transport system kinase [EC:2.7.-.-]%379%65.1715039577836%1e-145	-	-	-		0	0	0	4	0	0	0	0	0	0	0	0	0	0	0	0	0	0
	GS_05263	-	-	-	-	Y		K11252-histone H2B	IPR000558-Histone H2B IPR007125-Histone core IPR009072-Histone-fold	Biological Process: nucleosome assembly (GO:0006334), Cellular Component: nucleosome (GO:0000786), Cellular Component: nucleus (GO:0005634), Molecular Function: DNA binding (GO:0003677)	bmy:Bm1_20280 Probable histone H2B 3; K11252 histone H2B%122%90.983606557377%1e-52	-	-	-		0	0	0	4	0	0	0	0	0	0	0	0	0	0	0	0	0	0
	GS_05979	-	-	-	-	Y		-	IPR001609-Myosin head, motor domain	Cellular Component: myosin complex (GO:0016459), Molecular Function: ATP binding (GO:0005524), Molecular Function: motor activity (GO:0003774)	cbr:CBG20192 Cbr-hum-5; C. briggsae CBR-HUM-5 protein; K10356 myosin I%130%75.3846153846154%3e-53	-	-	-		0	0	0	4	0	0	0	0	0	0	0	0	0	0	0	0	0	0
	GS_06888	-	-	-	-	Y		-	IPR006822-Coatomer, epsilon subunit IPR011990-Tetratricopeptide-like helical	Biological Process: retrograde vesicle-mediated transport, Golgi to ER (GO:0006890), Cellular Component: COPI vesicle coat (GO:0030126), Molecular Function: binding (GO:0005488), Molecular Function: structural molecule activity (GO:0005198)	bmy:Bm1_28015 Coatomer epsilon subunit family protein%296%63.1756756756757%1e-100	-	-	Y		0	0	0	4	0	0	0	0	0	0	0	0	0	0	0	0	0	0
	GS_07932	-	-	-	-	Y		-	IPR001650-Helicase, C-terminal	Molecular Function: ATP binding (GO:0005524), Molecular Function: helicase activity (GO:0004386), Molecular Function: nucleic acid binding (GO:0003676)	Channels and Transporters%gnl|TC-DB|Q13838%3%Primary active transporters%3.A.%P-P-bond-hydrolysis-driven transporters%3.A.1% ATP-binding Cassette (ABC) Superfamily.%3.A.18.1.1% ATP-binding Cassette (ABC) Superfamily.; Nuclear mRNA Exporter (mRNA-E) Family.%Spliceosome RNA helicase BAT1 - Homo sapiens (Human).%130%90%3.00E-66	-	-	-		0	0	0	4	0	0	0	0	0	0	0	0	0	0	0	0	0	0
	GS_08142	-	-	-	-	Y		K15292-syntaxin-binding protein 1	IPR001619-Sec1-like protein	Biological Process: vesicle docking involved in exocytosis (GO:0006904), Biological Process: vesicle-mediated transport (GO:0016192)	bmy:Bm1_16115 acetylcholine regulator unc-18%553%89.3309222423146%0.0	-	-	Y		0	0	0	4	0	0	0	0	0	0	0	0	0	0	0	0	0	0
	GS_08322	-	-	-	-	Y		K00750-glycogenin glucosyltransferase	IPR002495-Glycosyl transferase, family 8	Molecular Function: transferase activity, transferring glycosyl groups (GO:0016757)	bmy:Bm1_16775 Glycogenin-1; K00750 glycogenin glucosyltransferase [EC:2.4.1.186]%247%73.2793522267206%1e-109	-	-	Y		0	0	0	4	0	0	0	0	0	0	0	0	0	0	0	0	0	0
	GS_08332	-	-	-	-	Y		-	IPR015719-Glycoprotein 25L-related IPR009038-GOLD	Biological Process: transport (GO:0006810), Cellular Component: integral to membrane (GO:0016021)	sp|Q295B2|TMEDE_DROPS%%Transmembrane emp24 domain-containing protein eca OS=Drosophila pseudoobscura pseudoobscura GN=eca PE=3 SV=1%%1.3e-84	Y	-	-		0	0	0	4	0	0	0	0	0	0	0	0	0	0	0	0	0	0
	GS_08739	-	-	-	-	Y		-	IPR019133-Mitochondrial inner membrane protein Mitofilin	Cellular Component: integral to mitochondrial inner membrane (GO:0031305)	sp|Q3KR86|IMMT_RAT%%Mitochondrial inner membrane protein (Fragment) OS=Rattus norvegicus GN=Immt PE=1 SV=1%%2.6e-172	-	Y	-		0	0	0	4	0	0	0	0	0	0	0	0	0	0	0	0	0	0
	GS_09537	-	-	-	-	Y		K13997-dihydrolipoamide dehydrogenase-binding protein of pyruvate dehydrogenase complex	IPR004167-E3 binding IPR023213-Chloramphenicol acetyltransferase-like domain IPR001078-2-oxoacid dehydrogenase acyltransferase, catalytic domain	Biological Process: metabolic process (GO:0008152), Molecular Function: acyltransferase activity (GO:0008415)	sp|P0AFG6|ODO2_ECOLI%%Dihydrolipoyllysine-residue succinyltransferase component of 2-oxoglutarate dehydrogenase complex OS=Escherichia coli (strain K12) GN=sucB PE=1 SV=2%%1.1e-125	-	Y	-		0	0	0	4	0	0	0	0	0	0	0	0	0	0	0	0	0	0
	GS_10546	-	-	-	-	Y		-	IPR018249-EF-HAND 2 IPR011992-EF-hand-like domain	Molecular Function: calcium ion binding (GO:0005509)	bmy:Bm1_21060 myosin; K12752 myosin light chain, invertebrate%57%85.9649122807018%7e-24	-	-	-		0	0	0	4	0	0	0	0	0	0	0	0	0	0	0	0	0	0
	GS_10571	-	-	-	-	Y		K08792-serum/glucocorticoid-regulated kinase, invertebrate	IPR011009-Protein kinase-like domain IPR008271-Serine/threonine-protein kinase, active site IPR002290-Serine/threonine-protein kinase domain IPR020635-Tyrosine-protein kinase, catalytic domain IPR017892-Protein kinase, C-terminal IPR017441-Protein kinase, ATP binding site IPR017442-Serine/threonine-protein kinase-like domain IPR001683-Phox homologous domain IPR000961-AGC-kinase, C-terminal IPR000…	Biological Process: cell communication (GO:0007154), Biological Process: protein phosphorylation (GO:0006468), Molecular Function: ATP binding (GO:0005524), Molecular Function: phosphatidylinositol binding (GO:0035091), Molecular Function: protein binding (GO:0005515), Molecular Function: protein kinase activity (GO:0004672), Molecular Function: protein serine/threonine kinase activity (GO:000467…	ks-sarfari_kinase%serum/glucocorticoid regulated kinase%AGC%SGK%SGK%9606%hSGK_1964%259%61.7760617760618%1e-90	-	-	Y		0	0	0	4	0	0	0	0	0	0	0	0	0	0	0	0	0	0
	GS_10618	-	-	-	-	Y		K02893-large subunit ribosomal protein L23Ae	IPR001014-Ribosomal protein L23/L25, conserved site IPR012678-Ribosomal protein L23/L15e IPR012677-Nucleotide-binding, alpha-beta plait IPR005633-Ribosomal protein L23/L25, N-terminal IPR013025-Ribosomal protein L25/L23	Biological Process: translation (GO:0006412), Cellular Component: intracellular (GO:0005622), Cellular Component: ribosome (GO:0005840), Molecular Function: nucleotide binding (GO:0000166), Molecular Function: RNA binding (GO:0003723), Molecular Function: structural constituent of ribosome (GO:0003735)	bmy:Bm1_04800 60S ribosomal protein L23a; K02893 large subunit ribosomal protein L23Ae%164%74.390243902439%8e-59	-	-	-		0	0	0	4	0	0	0	0	0	0	0	0	0	0	0	0	0	0
	GS_12732	-	-	-	-	Y		K02917-large subunit ribosomal protein L35Ae	IPR009000-Translation elongation/initiation factor/Ribosomal, beta-barrel IPR018266-Ribosomal protein L35Ae, conserved site IPR001780-Ribosomal protein L35A	Biological Process: translation (GO:0006412), Cellular Component: intracellular (GO:0005622), Cellular Component: ribosome (GO:0005840), Molecular Function: structural constituent of ribosome (GO:0003735)	bmy:Bm1_38825 60S ribosomal protein L35a; K02917 large subunit ribosomal protein L35Ae%117%70.0854700854701%5e-45	-	-	-		0	0	0	4	0	0	0	0	0	0	0	0	0	0	0	0	0	0
	GS_17259	-	-	-	-	Y		K02136-F-type H+-transporting ATPase subunit gamma	IPR000131-ATPase, F1 complex, gamma subunit IPR023633-ATPase, F1 complex, gamma subunit domain IPR023632-ATPase, F1 complex, gamma subunit conserved site	Biological Process: ATP synthesis coupled proton transport (GO:0015986), Cellular Component: proton-transporting ATP synthase complex, catalytic core F(1) (GO:0045261), Molecular Function: hydrogen ion transporting ATP synthase activity, rotational mechanism (GO:0046933), Molecular Function: proton-transporting ATPase activity, rotational mechanism (GO:0046961)	Channels and Transporters%gnl|TC-DB|P38077%3%Primary active transporters%3.A.%P-P-bond-hydrolysis-driven transporters%3.A.2%" H+- or Na+-translocating F-type, V-type and A-type ATPase (F-ATPase) Superfamily."%3.A.2.1.3%" H+- or Na+-translocating F-type, V-type and A-type ATPase (F-ATPase) Superfamily."%"ATP synthase gamma chain, mitochondrial precursor (EC 3.6.1.34) - Saccharomyces cerevisiae (Ba…	-	-	-		0	0	0	4	0	0	0	0	0	0	0	0	0	0	0	0	0	0
	GS_19162	-	-	-	-	Y		-	IPR001611-Leucine-rich repeat IPR003591-Leucine-rich repeat, typical subtype	Molecular Function: protein binding (GO:0005515)	GPCR%Class A%Q9BXB1%Class A Orphans%Class A Orphans%LGR4%GPR48%107515%156%28.8461538461538%2e-09	Y	-	-		0	0	0	4	0	0	0	0	0	0	0	0	0	0	0	0	0	0
	GS_19987	-	-	-	-	Y		-	IPR015943-WD40/YVTN repeat-like-containing domain IPR019781-WD40 repeat, subgroup IPR020472-G-protein beta WD-40 repeat IPR017986-WD40-repeat-containing domain IPR019782-WD40 repeat 2 IPR011046-WD40 repeat-like-containing domain IPR001680-WD40 repeat IPR006692-Coatomer, WD associated region	Biological Process: intracellular protein transport (GO:0006886), Biological Process: vesicle-mediated transport (GO:0016192), Cellular Component: membrane coat (GO:0030117), Molecular Function: protein binding (GO:0005515), Molecular Function: structural molecule activity (GO:0005198)	Channels and Transporters%gnl|TC-DB|Q9LP54%3%Primary active transporters%3.A.%P-P-bond-hydrolysis-driven transporters%3.A.2%" H+- or Na+-translocating F-type, V-type and A-type ATPase (F-ATPase) Superfamily."%3.A.20.1.2%" H+- or Na+-translocating F-type, V-type and A-type ATPase (F-ATPase) Superfamily.; Peroxisomal Protein Importer (PPI) Family."%At1g29260 OS=Arabidopsis thaliana GN=At1g29260 PE=…	-	-	Y		0	0	0	4	0	0	0	0	0	0	0	0	0	0	0	0	0	0
	GS_20427	-	-	-	-	Y		K05658-ATP-binding cassette, subfamily B (MDR/TAP), member 1	IPR017940-ABC transporter, integral membrane type 1 IPR011527-ABC transporter, transmembrane domain, type 1 IPR001140-ABC transporter, transmembrane domain IPR003439-ABC transporter-like IPR003593-ATPase, AAA+ type, core IPR017871-ABC transporter, conserved site	Biological Process: transmembrane transport (GO:0055085), Biological Process: transport (GO:0006810), Cellular Component: integral to membrane (GO:0016021), Molecular Function: ATP binding (GO:0005524), Molecular Function: ATPase activity (GO:0016887), Molecular Function: ATPase activity, coupled to transmembrane movement of substances (GO:0042626), Molecular Function: nucleoside-triphosphatase a…	Channels and Transporters%gnl|TC-DB|P08183%3%Primary active transporters%3.A.%P-P-bond-hydrolysis-driven transporters%3.A.1% ATP-binding Cassette (ABC) Superfamily.%3.A.1.201.1% ATP-binding Cassette (ABC) Superfamily.%Multidrug resistance protein 1 (P-glycoprotein 1) - Homo sapiens (Human).%1148%37.71777003%0	Y	-	-		0	0	0	4	0	0	0	0	0	0	0	0	0	0	0	0	0	0
	GS_20552	-	-	-	-	Y		-	IPR002213-UDP-glucuronosyl/UDP-glucosyltransferase	Biological Process: metabolic process (GO:0008152), Molecular Function: transferase activity, transferring hexosyl groups (GO:0016758)	bmy:Bm1_13480 UDP-glucoronosyl and UDP-glucosyl transferase family protein; K00699 glucuronosyltransferase [EC:2.4.1.17]%466%30.0429184549356%1e-54	Y	-	Y		0	0	0	4	0	0	0	0	0	0	0	0	0	0	0	0	0	0
	GS_20839	-	-	-	-	Y		K09486-hypoxia up-regulated 1	IPR013126-Heat shock protein 70 IPR001023-Heat shock protein Hsp70	Molecular Function: ATP binding (GO:0005524)	Channels and Transporters%gnl|TC-DB|P08107%1%Channel/pores%1.A.%alpha-type channels%1.A.3% Voltage-gated Ion Channel (VIC) Superfamily .%1.A.33.1.3%" Cation Channel-forming Heat Shock Protein-70 (Hsp70) Family.; Ryanodine-Inositol 1,4,5-triphosphate Receptor Ca2+ Channel (RIR-CaC) Family."%Heat shock 70 kDa protein 1 (HSP70.1) (HSP70-1/HSP70-2) - Homo sapiens (Human).%460%31.73913043%7.00E-59	-	-	Y		0	0	0	4	0	0	0	0	0	0	0	0	0	0	0	0	0	0
	GS_21590	-	-	-	-	Y		-	IPR016040-NAD(P)-binding domain IPR000534-Semialdehyde dehydrogenase, NAD-binding	Biological Process: cellular amino acid metabolic process (GO:0006520), Cellular Component: cytoplasm (GO:0005737), Molecular Function: binding (GO:0005488), Molecular Function: NAD binding (GO:0051287), Molecular Function: oxidoreductase activity, acting on the aldehyde or oxo group of donors, NAD or NADP as acceptor (GO:0016620)	xtr:448294 htatip2, MGC89074; HIV-1 Tat interactive protein 2, 30kDa%220%40.9090909090909%4e-43	-	-	-		0	0	0	4	0	0	0	0	0	0	0	0	0	0	0	0	0	0
	GS_23898	-	-	-	-	Y		K03965-NADH dehydrogenase (ubiquinone) 1 beta subcomplex 9	-	-	Channels and Transporters%gnl|TC-DB|Q02369%3%Primary active transporters%3.D.%Oxidoreduction-driven transporters%3.D.1%Oxidoreduction-driven transporters%3.D.1.6.1% H+ or Na+-translocating NADH Dehydrogenase (NDH) Family.%NADH dehydrogenase [ubiquinone] 1 beta subcomplex subunit 9 - Bos taurus (Bovine).%147%39.45578231%3.00E-21	-	-	-		0	0	0	4	0	0	0	0	0	0	0	0	0	0	0	0	0	0
	GS_24135	-	-	-	-	Y		K00624-carnitine O-acetyltransferase	IPR000542-Acyltransferase ChoActase/COT/CPT	Molecular Function: acyltransferase activity (GO:0008415)	Channels and Transporters%gnl|TC-DB|P43155%4%Group translocators%4.C.%Acyl CoA ligase-coupled transporters%4.C.2%Acyl CoA ligase-coupled transporters%4.C.2.1.1% Carnitine O-Acyl Transferase (CrAT) Family.%Carnitine O-acetyltransferase - Homo sapiens (Human).%541%39.18669131%1.00E-111	-	-	Y		0	0	0	4	0	0	0	0	0	0	0	0	0	0	0	0	0	0
	GS_00566	-	-	-	-	Y		-	IPR004087-K Homology IPR004088-K Homology, type 1 IPR018111-K Homology, type 1, subgroup	Molecular Function: RNA binding (GO:0003723)	bmy:Bm1_44975 KH domain containing protein%637%57.7708006279435%0.0	-	-	-		0	0	0	3	0	0	0	0	0	0	0	0	0	0	0	0	0	0
	GS_00905	-	-	-	-	Y		K09510-DnaJ homolog subfamily B member 4	IPR008971-HSP40/DnaJ peptide-binding IPR002939-Chaperone DnaJ, C-terminal IPR003095-Heat shock protein DnaJ IPR018253-Heat shock protein DnaJ, conserved site IPR001623-Heat shock protein DnaJ, N-terminal	Biological Process: protein folding (GO:0006457), Molecular Function: heat shock protein binding (GO:0031072), Molecular Function: unfolded protein binding (GO:0051082)	Channels and Transporters%gnl|TC-DB|P14906%3%Primary active transporters%3.A.%P-P-bond-hydrolysis-driven transporters%3.A.5% General Secretory Pathway (Sec) Family.%3.A.5.8.1% General Secretory Pathway (Sec) Family.%Translocation protein (NPL1 protein) - Saccharomyces cerevisiae (Baker's yeast).%71%38.02816901%2.00E-08	-	-	-		0	0	0	3	0	0	0	0	0	0	0	0	0	0	0	0	0	0
	GS_02203	-	-	-	-	Y		K12836-splicing factor U2AF 35 kDa subunit	IPR021131-Ribosomal protein L18e/L15P IPR000504-RNA recognition motif domain IPR012677-Nucleotide-binding, alpha-beta plait IPR021132-Ribosomal protein L18e, conserved site IPR003954-RNA recognition motif domain, eukaryote IPR000571-Zinc finger, CCCH-type IPR009145-U2 auxiliary factor small subunit	Biological Process: translation (GO:0006412), Cellular Component: intracellular (GO:0005622), Cellular Component: nucleus (GO:0005634), Cellular Component: ribosome (GO:0005840), Molecular Function: nucleic acid binding (GO:0003676), Molecular Function: nucleotide binding (GO:0000166), Molecular Function: RNA binding (GO:0003723), Molecular Function: structural constituent of ribosome (GO:0003735…	bmy:Bm1_19485 U2 small nuclear RNA auxiliary factor small subunit, putative; K12836 splicing factor U2AF 35 kDa subunit%244%65.5737704918033%2e-80	-	-	-		0	0	0	3	0	0	0	0	0	0	0	0	0	0	0	0	0	0
	GS_02248	-	-	-	-	Y		K04571-translocon-associated protein subunit delta	IPR008855-Translocon-associated	Cellular Component: endoplasmic reticulum (GO:0005783), Cellular Component: integral to membrane (GO:0016021)	bmy:Bm1_39305 Translocon-associated protein, delta subunit precursor, putative; K04571 translocon-associated protein subunit delta%167%70.059880239521%3e-63	Y	-	-		0	0	0	3	0	0	0	0	0	0	0	0	0	0	0	0	0	0
	GS_02943	-	-	-	-	Y		K00315-dimethylglycine dehydrogenase	IPR006222-Glycine cleavage T-protein, N-terminal IPR006076-FAD dependent oxidoreductase IPR013977-Glycine cleavage T-protein, C-terminal barrel	Biological Process: glycine catabolic process (GO:0006546), Cellular Component: cytoplasm (GO:0005737), Molecular Function: aminomethyltransferase activity (GO:0004047), Molecular Function: oxidoreductase activity (GO:0016491)	bmy:Bm1_17220 dimethylglycine dehydrogenase, mitochondrial precursor, putative; K00315 dimethylglycine dehydrogenase [EC:1.5.99.2]%809%64.7713226205192%0.0	-	-	Y		0	0	0	3	0	0	0	0	0	0	0	0	0	0	0	0	0	0
	GS_03257	-	-	-	-	Y		K00234-succinate dehydrogenase (ubiquinone) flavoprotein subunit	IPR015939-Fumarate reductase/succinate dehydrogenase flavoprotein-like, C-terminal IPR014006-Succinate dehydrogenase/fumarate reductase, flavoprotein subunit IPR003953-Fumarate reductase/succinate dehydrogenase flavoprotein, N-terminal IPR004112-Fumarate reductase/succinate dehydrogenase flavoprotein, C-terminal IPR011281-Succinate dehydrogenase, flavoprotein subunit IPR003952-Fumarate reductase/…	Biological Process: electron transport chain (GO:0022900), Biological Process: oxidation-reduction process (GO:0055114), Biological Process: tricarboxylic acid cycle (GO:0006099), Molecular Function: electron carrier activity (GO:0009055), Molecular Function: flavin adenine dinucleotide binding (GO:0050660), Molecular Function: oxidoreductase activity (GO:0016491), Molecular Function: oxidoreduct…	Channels and Transporters%gnl|TC-DB|Q65GF4%5%Transport electron carriers%5.A.%Transmembrane 2-electron transfer carriers%5.A.4%Transmembrane 2-electron transfer carriers%5.A.4.1.1% Prokaryotic Succinate Dehydrogenase (SDH) Family.%SdhA OS=Bacillus licheniformis (strain DSM 13 / ATCC 14580) GN=sdhA PE=4 SV=1%525%31.42857143%1.00E-60	-	-	-		0	0	0	3	0	0	0	0	0	0	0	0	0	0	0	0	0	0
	GS_03386	-	-	-	-	Y		K00721-dolichol-phosphate mannosyltransferase	IPR001173-Glycosyl transferase, family 2	-	sp|Q8L0V4|CHS_ECOLX%%Chondroitin synthase OS=Escherichia coli GN=kfoC PE=1 SV=1%%8.3e-80	-	-	-		0	0	0	3	0	0	0	0	0	0	0	0	0	0	0	0	0	0
	GS_04363	-	-	-	-	Y		K14163-bifunctional glutamyl/prolyl-tRNA synthetase	IPR000738-WHEP-TRS IPR010987-Glutathione S-transferase, C-terminal-like IPR020059-Glutamyl/glutaminyl-tRNA synthetase, class Ic, anti-codon binding domain IPR001412-Aminoacyl-tRNA synthetase, class I, conserved site IPR020058-Glutamyl/glutaminyl-tRNA synthetase, class Ic, catalytic domain IPR004526-Glutamyl-tRNA synthetase, class Ic, archaeal/eukaryotic cytosolic IPR014729-Rossmann-like alpha/bet…	Biological Process: glutamyl-tRNA aminoacylation (GO:0006424), Biological Process: translation (GO:0006412), Biological Process: tRNA aminoacylation (GO:0043039), Biological Process: tRNA aminoacylation for protein translation (GO:0006418), Cellular Component: cytoplasm (GO:0005737), Molecular Function: aminoacyl-tRNA ligase activity (GO:0004812), Molecular Function: ATP binding (GO:0005524), Mol…	bmy:Bm1_28580 bifunctional aminoacyl-tRNA synthetase (EC:6.1.1.17 6.1.1.15); K14163 bifunctional glutamyl/prolyl-tRNA synthetase [EC:6.1.1.17 6.1.1.15]%1059%56.9405099150142%0.0	-	-	-		0	0	0	3	0	0	0	0	0	0	0	0	0	0	0	0	0	0
	GS_05128	-	-	-	-	Y		K08237-hydroquinone glucosyltransferase	IPR002213-UDP-glucuronosyl/UDP-glucosyltransferase	Biological Process: metabolic process (GO:0008152), Molecular Function: transferase activity, transferring hexosyl groups (GO:0016758)	cel:T25B9.7 ugt-54; UDP-GlucuronosylTransferase family member (ugt-54)%321%34.8909657320872%1e-47	-	-	Y		0	0	0	3	0	0	0	0	0	0	0	0	0	0	0	0	0	0
	GS_05988	-	-	-	-	Y		-	IPR013078-Histidine phosphatase superfamily, clade-1	-	sp|B3QVL0|GPMA_CHLT3%%2,3-bisphosphoglycerate-dependent phosphoglycerate mutase OS=Chloroherpeton thalassium (strain ATCC 35110 / GB-78) GN=gpmA PE=3 SV=1%%3.4e-80	-	-	-		0	0	0	3	0	0	0	0	0	0	0	0	0	0	0	0	0	0
	GS_06161	-	-	-	-	Y		-	IPR002213-UDP-glucuronosyl/UDP-glucosyltransferase	Biological Process: metabolic process (GO:0008152), Molecular Function: transferase activity, transferring hexosyl groups (GO:0016758)	cel:AC3.2 ugt-49; UDP-GlucuronosylTransferase family member (ugt-49)%477%42.7672955974843%1e-118	Y	-	-		0	0	0	3	0	0	0	0	0	0	0	0	0	0	0	0	0	0
	GS_06702	-	-	-	-	Y		-	IPR013320-Concanavalin A-like lectin/glucanase, subgroup IPR008985-Concanavalin A-like lectin/glucanase	-	cbr:CBG04100 Cbr-itx-1; C. briggsae CBR-ITX-1 protein%353%24.6458923512748%3e-22	Y	-	-		0	0	0	3	0	0	0	0	0	0	0	0	0	0	0	0	0	0
	GS_07468	-	-	-	-	Y		K13577-solute carrier family 25 (mitochondrial dicarboxylate transporter), member 10	IPR018108-Mitochondrial substrate/solute carrier IPR023395-Mitochondrial carrier domain	-	Channels and Transporters%gnl|TC-DB|O89035%2%Electorchemical potential-driven transporters%2.A.%"Porters (uniporters, symporters, antiporters)"%2.A.2%Cation Symporter Family%2.A.29.2.2% Glycoside-Pentoside-Hexuronide (GPH):Cation Symporter Family.; Mitochondrial Carrier (MC) Family .%MITOCHONDRIAL DICARBOXYLATE CARRIER - Rattus norvegicus (Rat).%278%63.66906475%1.00E-104	-	-	Y		0	0	0	3	0	0	0	0	0	0	0	0	0	0	0	0	0	0
	GS_08011	-	-	-	-	Y		K00326-cytochrome-b5 reductase	IPR017927-Ferredoxin reductase-type FAD-binding domain IPR001709-Flavoprotein pyridine nucleotide cytochrome reductase IPR008333-Oxidoreductase, FAD-binding domain IPR017938-Riboflavin synthase-like beta-barrel IPR001834-NADH:cytochrome b5 reductase (CBR) IPR001433-Oxidoreductase FAD/NAD(P)-binding	Biological Process: oxidation-reduction process (GO:0055114), Molecular Function: oxidoreductase activity (GO:0016491)	Channels and Transporters%gnl|TC-DB|Q56584%3%Primary active transporters%3.D.%Oxidoreduction-driven transporters%3.D.5%Oxidoreduction-driven transporters%3.D.5.1.1% Na+-translocating NADH:Quinone Dehydrogenase (Na-NDH) Family.%Na(+)-translocating NADH-quinone reductase subunit F (EC 1.6.5.-) (Na(+)-translocating NADH-quinone reductase subunit beta) (Na(+)- translocating NQR subunit F) (Na(+)-NQR …	Y	-	-		0	0	0	3	0	0	0	0	0	0	0	0	0	0	0	0	0	0
	GS_08217	-	-	-	-	Y		K03946-NADH dehydrogenase (ubiquinone) 1 alpha subcomplex 2	IPR007741-Ribosomal protein/NADH dehydrogenase domain IPR012336-Thioredoxin-like fold	-	Channels and Transporters%gnl|TC-DB|Q02370%3%Primary active transporters%3.D.%Oxidoreduction-driven transporters%3.D.1%Oxidoreduction-driven transporters%3.D.1.6.1% H+ or Na+-translocating NADH Dehydrogenase (NDH) Family.%NADH dehydrogenase [ubiquinone] 1 alpha subcomplex subunit 2 - Bos taurus (Bovine).%77%58.44155844%2.00E-23	-	-	-		0	0	0	3	0	0	0	0	0	0	0	0	0	0	0	0	0	0
	GS_08502	-	-	-	-	Y		K02918-large subunit ribosomal protein L35e	IPR018254-Ribosomal protein L29, conserved site IPR001854-Ribosomal protein L29	Biological Process: translation (GO:0006412), Cellular Component: intracellular (GO:0005622), Cellular Component: ribosome (GO:0005840), Molecular Function: structural constituent of ribosome (GO:0003735)	bmy:Bm1_32865 60S ribosomal protein L35; K02918 large subunit ribosomal protein L35e%123%86.9918699186992%5e-53	-	-	-		0	0	0	3	0	0	0	0	0	0	0	0	0	0	0	0	0	0
	GS_08543	-	-	-	-	Y		-	IPR009028-Clathrin/coatomer adaptor, adaptin-like, appendage, C-terminal subdomain IPR002553-Clathrin/coatomer adaptor, adaptin-like, N-terminal IPR016024-Armadillo-type fold IPR011989-Armadillo-like helical IPR013040-Coatomer, gamma subunit, appendage, Ig-like subdomain IPR013041-Clathrin/coatomer adaptor, adaptin-like, appendage, Ig-like subdomain IPR015873-Clathrin alpha-adaptin/coatomer adapt…	Biological Process: intracellular protein transport (GO:0006886), Biological Process: vesicle-mediated transport (GO:0016192), Cellular Component: COPI vesicle coat (GO:0030126), Cellular Component: Golgi-associated vesicle (GO:0005798), Cellular Component: membrane coat (GO:0030117), Molecular Function: binding (GO:0005488), Molecular Function: structural molecule activity (GO:0005198)	bmy:Bm1_10670 coatomer gamma subunit%878%80.2961275626424%0.0	-	-	Y		0	0	0	3	0	0	0	0	0	0	0	0	0	0	0	0	0	0
	GS_09839	-	-	-	-	Y		K05402-toll-interacting protein	IPR008973-C2 calcium/lipid-binding domain, CaLB IPR000008-C2 calcium-dependent membrane targeting IPR003892-Ubiquitin system component Cue IPR009060-UBA-like	Molecular Function: protein binding (GO:0005515)	cbr:CBG02241 Cbr-tli-1; C. briggsae CBR-TLI-1 protein; K05402 toll-interacting protein%270%51.1111111111111%2e-74	-	-	Y		0	0	0	3	0	0	0	0	0	0	0	0	0	0	0	0	0	0
	GS_10226	-	-	-	-	Y		K07836-Ras-related protein Rap-1B	IPR001806-Ras GTPase IPR020849-Ras small GTPase IPR013753-Ras IPR002041-Ran GTPase IPR003579-Ras small GTPase, Rab type IPR003578-Small GTPase, Rho type IPR003577-Ras small GTPase, Ras type IPR005225-Small GTP-binding protein domain	Biological Process: GTP catabolic process (GO:0006184), Biological Process: intracellular protein transport (GO:0006886), Biological Process: nucleocytoplasmic transport (GO:0006913), Biological Process: protein transport (GO:0015031), Biological Process: signal transduction (GO:0007165), Biological Process: small GTPase mediated signal transduction (GO:0007264), Cellular Component: intracellular…	GTPase%rap_1 %184%94.0217391304348%1e-101	-	-	Y		0	0	0	3	0	0	0	0	0	0	0	0	0	0	0	0	0	0
	GS_10755	-	-	-	-	Y		K08486-syntaxin 1B/2/3	IPR000727-Target SNARE coiled-coil domain IPR010989-t-SNARE IPR006011-Syntaxin, N-terminal IPR006012-Syntaxin/epimorphin, conserved site	Biological Process: intracellular protein transport (GO:0006886), Biological Process: vesicle-mediated transport (GO:0016192), Cellular Component: membrane (GO:0016020), Molecular Function: protein binding (GO:0005515), Molecular Function: SNAP receptor activity (GO:0005484)	Channels and Transporters%gnl|TC-DB|Q16623%1%Channel/pores%1.F.%Vescile fusion pores%1.F.1%Vescile fusion pores%1.F.1.1.1% Synaptosomal Vesicle Fusion Pore (SVF-Pore) Family.%Syntaxin-1A - Homo sapiens (Human).%228%72.80701754%4.00E-91	Y	-	-		0	0	0	3	0	0	0	0	0	0	0	0	0	0	0	0	0	0
	GS_10772	-	-	-	-	Y		-	IPR001452-Src homology-3 domain	Molecular Function: protein binding (GO:0005515)	sp|Q9NZM3|ITSN2_HUMAN%%Intersectin-2 OS=Homo sapiens GN=ITSN2 PE=1 SV=3%%3.9e-73	-	-	Y		0	0	0	3	0	0	0	0	0	0	0	0	0	0	0	0	0	0
	GS_11300	-	-	-	-	Y		K07904-Ras-related protein Rab-11A	IPR020851-Small GTPase IPR001806-Ras GTPase IPR013753-Ras IPR002041-Ran GTPase IPR003579-Ras small GTPase, Rab type IPR003578-Small GTPase, Rho type IPR003577-Ras small GTPase, Ras type IPR005225-Small GTP-binding protein domain	Biological Process: GTP catabolic process (GO:0006184), Biological Process: intracellular protein transport (GO:0006886), Biological Process: nucleocytoplasmic transport (GO:0006913), Biological Process: protein transport (GO:0015031), Biological Process: signal transduction (GO:0007165), Biological Process: small GTPase mediated signal transduction (GO:0007264), Cellular Component: intracellular…	GTPase%rab_11.1 %212%89.1509433962264%1e-107	-	-	-		0	0	0	3	0	0	0	0	0	0	0	0	0	0	0	0	0	0
	GS_11472	-	-	-	-	Y		K05719-integrin beta 1	IPR002369-Integrin beta subunit, N-terminal IPR013111-EGF, extracellular IPR012896-Integrin beta subunit, tail IPR016201-Plexin-like fold IPR015812-Integrin beta subunit	Biological Process: cell adhesion (GO:0007155), Biological Process: cell-matrix adhesion (GO:0007160), Biological Process: integrin-mediated signaling pathway (GO:0007229), Biological Process: multicellular organismal development (GO:0007275), Cellular Component: integrin complex (GO:0008305), Cellular Component: membrane (GO:0016020), Molecular Function: binding (GO:0005488), Molecular Function:…	bmy:Bm1_20780 Integrin beta pat-3 precursor; K05719 integrin beta 1%715%88.6713286713287%0.0	-	-	Y		0	0	0	3	0	0	0	0	0	0	0	0	0	0	0	0	0	0
	GS_11601	-	-	-	-	Y		K03953-NADH dehydrogenase (ubiquinone) 1 alpha subcomplex 9	IPR008030-NmrA-like IPR016040-NAD(P)-binding domain	Molecular Function: binding (GO:0005488)	Channels and Transporters%gnl|TC-DB|P34943%3%Primary active transporters%3.D.%Oxidoreduction-driven transporters%3.D.1%Oxidoreduction-driven transporters%3.D.1.6.1% H+ or Na+-translocating NADH Dehydrogenase (NDH) Family.%"NADH dehydrogenase [ubiquinone] 1 alpha subcomplex subunit 9, mitochondrial - Bos taurus (Bovine)."%342%38.88888889%9.00E-61	-	-	Y		0	0	0	3	0	0	0	0	0	0	0	0	0	0	0	0	0	0
	GS_12530	-	-	-	-	Y		K03959-NADH dehydrogenase (ubiquinone) 1 beta subcomplex 3	IPR012576-NADH:ubiquinone oxidoreductase, B12 subunit	Cellular Component: mitochondrion (GO:0005739), Molecular Function: NADH dehydrogenase (ubiquinone) activity (GO:0008137)	sp|O43676|NDUB3_HUMAN%%NADH dehydrogenase [ubiquinone] 1 beta subcomplex subunit 3 OS=Homo sapiens GN=NDUFB3 PE=1 SV=3%%4.5e-46	-	-	-		0	0	0	3	0	0	0	0	0	0	0	0	0	0	0	0	0	0
	GS_12931	-	-	-	-	Y		K02889-large subunit ribosomal protein L21e	IPR001147-Ribosomal protein L21e IPR008991-Translation protein SH3-like IPR018259-Ribosomal protein L21e, conserved site	Biological Process: translation (GO:0006412), Cellular Component: intracellular (GO:0005622), Cellular Component: ribosome (GO:0005840), Molecular Function: structural constituent of ribosome (GO:0003735)	bmy:Bm1_47445 60S ribosomal protein L21; K02889 large subunit ribosomal protein L21e%160%84.375%1e-73	-	-	-		0	0	0	3	0	0	0	0	0	0	0	0	0	0	0	0	0	0
	GS_13285	-	-	-	-	Y		K08288-protein kinase C substrate 80K-H	IPR018249-EF-HAND 2 IPR009011-Mannose-6-phosphate receptor, binding IPR011992-EF-hand-like domain IPR012913-Glucosidase II beta subunit-like IPR002172-Low-density lipoprotein (LDL) receptor class A repeat	Molecular Function: calcium ion binding (GO:0005509), Molecular Function: protein binding (GO:0005515)	sp|Q28034|GLU2B_BOVIN%%Glucosidase 2 subunit beta OS=Bos taurus GN=PRKCSH PE=2 SV=1%%1.2e-252	-	Y	-		0	0	0	3	0	0	0	0	0	0	0	0	0	0	0	0	0	0
	GS_14030	-	-	-	-	Y		K02974-small subunit ribosomal protein S24e	IPR001976-Ribosomal protein S24e IPR012678-Ribosomal protein L23/L15e IPR012677-Nucleotide-binding, alpha-beta plait IPR018098-Ribosomal S24e conserved site	Biological Process: translation (GO:0006412), Cellular Component: intracellular (GO:0005622), Cellular Component: ribosome (GO:0005840), Molecular Function: nucleotide binding (GO:0000166), Molecular Function: structural constituent of ribosome (GO:0003735)	bmy:Bm1_04620 40S ribosomal protein S24; K02974 small subunit ribosomal protein S24e%127%85.0393700787402%8e-58	-	-	-		0	0	0	3	0	0	0	0	0	0	0	0	0	0	0	0	0	0
	GS_14112	-	-	-	-	Y		-	IPR002553-Clathrin/coatomer adaptor, adaptin-like, N-terminal IPR016024-Armadillo-type fold IPR011989-Armadillo-like helical IPR011710-Coatomer, beta subunit, C-terminal	Biological Process: intracellular protein transport (GO:0006886), Biological Process: vesicle-mediated transport (GO:0016192), Cellular Component: COPI vesicle coat (GO:0030126), Cellular Component: membrane coat (GO:0030117), Molecular Function: binding (GO:0005488), Molecular Function: structural molecule activity (GO:0005198)	bmy:Bm1_24795 coatomer beta subunit%956%82.2175732217573%0.0	-	-	Y		0	0	0	3	0	0	0	0	0	0	0	0	0	0	0	0	0	0
	GS_14945	-	-	-	-	Y		-	IPR003388-Reticulon	Cellular Component: endoplasmic reticulum (GO:0005783)	cel:W06A7.3 ret-1; RETiculon protein family member (ret-1)%466%37.7682403433476%8e-66	Y	-	-		0	0	0	3	0	0	0	0	0	0	0	0	0	0	0	0	0	0
	GS_14990	-	-	-	-	Y		K03456-protein phosphatase 2 (formerly 2A), regulatory subunit A	IPR016024-Armadillo-type fold IPR011989-Armadillo-like helical IPR000357-HEAT IPR021133-HEAT, type 2	Molecular Function: binding (GO:0005488), Molecular Function: protein binding (GO:0005515)	bmy:Bm1_14145 protein phosphatase PP2A regulatory subunit; K03456 protein phosphatase 2 (formerly 2A), regulatory subunit A%589%89.3039049235993%0.0	-	-	Y		0	0	0	3	0	0	0	0	0	0	0	0	0	0	0	0	0	0
	GS_15327	-	-	-	-	Y		-	IPR008969-Carboxypeptidase-like, regulatory domain IPR013784-Carbohydrate-binding-like fold IPR013783-Immunoglobulin-like fold IPR008970-Collagen-binding surface protein Cna, B-type domain	Molecular Function: binding (GO:0005488), Molecular Function: carbohydrate binding (GO:0030246)	sp|P69849|NOMO3_HUMAN%%Nodal modulator 3 OS=Homo sapiens GN=NOMO3 PE=2 SV=2%%0	-	Y	-		0	0	0	3	0	0	0	0	0	0	0	0	0	0	0	0	0	0
	GS_15478	-	-	-	-	Y		-	IPR001765-Carbonic anhydrase	Biological Process: carbon utilization (GO:0015976), Molecular Function: carbonate dehydratase activity (GO:0004089), Molecular Function: zinc ion binding (GO:0008270)	sp|Q22460|BCA1_CAEEL%%Beta carbonic anhydrase 1 OS=Caenorhabditis elegans GN=bca-1 PE=2 SV=1%%4.4e-113	-	-	Y		0	0	0	3	0	0	0	0	0	0	0	0	0	0	0	0	0	0
	GS_15530	-	-	-	-	Y		K02941-large subunit ribosomal protein LP0	IPR001790-Ribosomal protein L10/acidic P0 IPR001813-Ribosomal protein 60S	Biological Process: ribosome biogenesis (GO:0042254), Biological Process: translational elongation (GO:0006414), Cellular Component: intracellular (GO:0005622), Cellular Component: ribosome (GO:0005840), Molecular Function: structural constituent of ribosome (GO:0003735)	bmy:Bm1_31485 60S acidic ribosomal protein P0; K02941 large subunit ribosomal protein LP0%320%80.625%1e-148	-	-	-		0	0	0	3	0	0	0	0	0	0	0	0	0	0	0	0	0	0
	GS_15918	-	-	-	-	Y		K02872-large subunit ribosomal protein L13Ae	IPR005755-Ribosomal protein L13, eukaryotic/archaeal IPR023564-Ribosomal protein L13 domain IPR005822-Ribosomal protein L13	Biological Process: translation (GO:0006412), Cellular Component: large ribosomal subunit (GO:0015934), Cellular Component: ribosome (GO:0005840), Molecular Function: structural constituent of ribosome (GO:0003735)	bmy:Bm1_33290 60S ribosomal protein L13a; K02872 large subunit ribosomal protein L13Ae%203%79.8029556650246%1e-93	-	-	-		0	0	0	3	0	0	0	0	0	0	0	0	0	0	0	0	0	0
	GS_16393	-	-	-	-	Y		-	IPR018097-EGF-like calcium-binding, conserved site IPR000033-LDLR class B repeat IPR023415-Low-density lipoprotein (LDL) receptor class A, conserved site IPR009030-Growth factor, receptor IPR006210-Epidermal growth factor-like IPR011042-Six-bladed beta-propeller, TolB-like IPR000152-EGF-type aspartate/asparagine hydroxylation site IPR013091-EGF calcium-binding IPR001881-EGF-like calcium-binding I…	Molecular Function: calcium ion binding (GO:0005509), Molecular Function: protein binding (GO:0005515)	Channels and Transporters%gnl|TC-DB|Q924X6%9%Incompletely characterized transport systems%9.B.%Putative transport proteins%9.B.8% Canalicular Bile Acid Transporter (C-BAT) Family.%9.B.87.2.1% Canalicular Bile Acid Transporter (C-BAT) Family.; Selenoprotein P Receptor (SelP-receptor) Family.%Low-density lipoprotein receptor-related protein 8 - Mus musculus (Mouse).%801%34.45692884%1.00E-127	Y	-	-		0	0	0	3	0	0	0	0	0	0	0	0	0	0	0	0	0	0
	GS_16648	-	-	-	-	Y		-	IPR003131-Potassium channel, voltage dependent, Kv, tetramerisation IPR011333-BTB/POZ fold	Biological Process: potassium ion transport (GO:0006813), Cellular Component: membrane (GO:0016020), Cellular Component: voltage-gated potassium channel complex (GO:0008076), Molecular Function: voltage-gated potassium channel activity (GO:0005249)	sp|Q17RG1|KCD19_HUMAN%%BTB/POZ domain-containing protein KCTD19 OS=Homo sapiens GN=KCTD19 PE=2 SV=1%%6e-68	-	-	-		0	0	0	3	0	0	0	0	0	0	0	0	0	0	0	0	0	0
	GS_17151	-	-	-	-	Y		-	IPR018249-EF-HAND 2 IPR011992-EF-hand-like domain	Molecular Function: calcium ion binding (GO:0005509)	phu:Phum_PHUM172560 myosin-2 essential light chain, putative (EC:1.3.1.74); K12752 myosin light chain, invertebrate%137%40.8759124087591%3e-23	-	-	-		0	0	0	3	0	0	0	0	0	0	0	0	0	0	0	0	0	0
	GS_17832	-	-	-	-	Y		K07897-Ras-related protein Rab-7A	IPR020851-Small GTPase IPR001806-Ras GTPase IPR013753-Ras IPR002041-Ran GTPase IPR003579-Ras small GTPase, Rab type IPR003578-Small GTPase, Rho type IPR003577-Ras small GTPase, Ras type IPR005225-Small GTP-binding protein domain	Biological Process: GTP catabolic process (GO:0006184), Biological Process: intracellular protein transport (GO:0006886), Biological Process: nucleocytoplasmic transport (GO:0006913), Biological Process: protein transport (GO:0015031), Biological Process: signal transduction (GO:0007165), Biological Process: small GTPase mediated signal transduction (GO:0007264), Cellular Component: intracellular…	GTPase%rab_7 %205%80%2e-99	-	-	Y		0	0	0	3	0	0	0	0	0	0	0	0	0	0	0	0	0	0
	GS_17854	-	-	-	-	Y		K03936-NADH dehydrogenase (ubiquinone) Fe-S protein 3	IPR001268-NADH:ubiquinone oxidoreductase, 30kDa subunit IPR020396-NADH:ubiquinone oxidoreductase, 30kDa subunit, conserved site IPR010218-NADH dehydrogenase, subunit C	Biological Process: oxidation-reduction process (GO:0055114), Molecular Function: NADH dehydrogenase (ubiquinone) activity (GO:0008137), Molecular Function: oxidoreductase activity, acting on NADH or NADPH (GO:0016651)	Channels and Transporters%gnl|TC-DB|P23709%3%Primary active transporters%3.D.%Oxidoreduction-driven transporters%3.D.1%Oxidoreduction-driven transporters%3.D.1.6.1% H+ or Na+-translocating NADH Dehydrogenase (NDH) Family.%"NADH dehydrogenase [ubiquinone] iron-sulfur protein 3, mitochondrial - Bos taurus (Bovine)."%228%58.77192982%6.00E-79	-	-	Y		0	0	0	3	0	0	0	0	0	0	0	0	0	0	0	0	0	0
	GS_18200	-	-	-	-	Y		K02943-large subunit ribosomal protein LP2	IPR001813-Ribosomal protein 60S	Biological Process: translational elongation (GO:0006414), Cellular Component: intracellular (GO:0005622), Cellular Component: ribosome (GO:0005840), Molecular Function: structural constituent of ribosome (GO:0003735)	sp|O01725|RLA2_BRAFL%%60S acidic ribosomal protein P2 OS=Branchiostoma floridae PE=3 SV=1%%9.8e-38	-	Y	-		0	0	0	3	0	0	0	0	0	0	0	0	0	0	0	0	0	0
	GS_18254	-	-	-	-	Y		K09699-2-oxoisovalerate dehydrogenase E2 component (dihydrolipoyl transacylase)	IPR004167-E3 binding IPR023213-Chloramphenicol acetyltransferase-like domain IPR015761-Lipoamide Acyltransferase IPR001078-2-oxoacid dehydrogenase acyltransferase, catalytic domain	Biological Process: fatty-acyl-CoA biosynthetic process (GO:0046949), Biological Process: metabolic process (GO:0008152), Molecular Function: acyltransferase activity (GO:0008415), Molecular Function: cofactor binding (GO:0048037), Molecular Function: dihydrolipoyllysine-residue (2-methylpropanoyl)transferase activity (GO:0043754)	sp|P0AFG6|ODO2_ECOLI%%Dihydrolipoyllysine-residue succinyltransferase component of 2-oxoglutarate dehydrogenase complex OS=Escherichia coli (strain K12) GN=sucB PE=1 SV=2%%2.6e-128	-	-	Y		0	0	0	3	0	0	0	0	0	0	0	0	0	0	0	0	0	0
	GS_18542	-	-	-	-	Y		-	IPR004895-Prenylated rab acceptor PRA1	-	bmy:Bm1_36840 PRA1 family protein%189%51.3227513227513%1e-54	Y	-	-		0	0	0	3	0	0	0	0	0	0	0	0	0	0	0	0	0	0
	GS_18795	-	-	-	-	Y		K14463-microsomal triglyceride transfer protein large subunit	-	-	cel:K02D7.4 dsc-4; Defecation Suppressor of Clk-1 family member (dsc-4); K14463 microsomal triglyceride transfer protein large subunit%379%34.5646437994723%8e-58	-	-	Y		0	0	0	3	0	0	0	0	0	0	0	0	0	0	0	0	0	0
	GS_19122	-	-	-	-	Y		K02138-F-type H+-transporting ATPase subunit d	IPR008689-ATPase, F0 complex, subunit D, mitochondrial	Biological Process: ATP synthesis coupled proton transport (GO:0015986), Cellular Component: mitochondrial proton-transporting ATP synthase complex, coupling factor F(o) (GO:0000276), Molecular Function: hydrogen ion transmembrane transporter activity (GO:0015078)	cel:C06H2.1 atp-5; ATP synthase subunit family member (atp-5); K02138 F-type H+-transporting ATPase subunit d [EC:3.6.3.14]%191%64.9214659685864%4e-72	-	-	-		0	0	0	3	0	0	0	0	0	0	0	0	0	0	0	0	0	0
	GS_19399	-	-	-	-	Y		K06096-vesicle-associated membrane protein-associated protein A	IPR008962-PapD-like IPR000535-Major sperm protein	Molecular Function: structural molecule activity (GO:0005198)	Channels and Transporters%gnl|TC-DB|O95292%9%Incompletely characterized transport systems%9.B.%Putative transport proteins%9.B.1% Metal Homeostasis Protein (MHP) Family.%9.B.17.1.1% Metal Homeostasis Protein (MHP) Family.; VAMP-associated protein (VAP) Family.%Vesicle-associated membrane protein-associated protein B/C - Homo sapiens (Human).%224%39.28571429%1.00E-38	Y	-	-		0	0	0	3	0	0	0	0	0	0	0	0	0	0	0	0	0	0
	GS_19545	-	-	-	-	Y		-	IPR003347-Transcription factor jumonji/aspartyl beta-hydroxylase IPR022777-Cupin, JmjC-type IPR013109-Cupin 4	Molecular Function: protein binding (GO:0005515)	bmy:Bm1_53875 LD40453p%412%59.2233009708738%1e-152	-	-	Y		0	0	0	3	0	0	0	0	0	0	0	0	0	0	0	0	0	0
	GS_20124	-	-	-	-	Y		-	IPR009038-GOLD IPR015720-TMP21-related	Biological Process: transport (GO:0006810), Cellular Component: integral to membrane (GO:0016021)	sp|Q295B2|TMEDE_DROPS%%Transmembrane emp24 domain-containing protein eca OS=Drosophila pseudoobscura pseudoobscura GN=eca PE=3 SV=1%%2.4e-76	Y	-	-		0	0	0	3	0	0	0	0	0	0	0	0	0	0	0	0	0	0
	GS_21058	-	-	-	-	Y		K01196-glycogen debranching enzyme	IPR006421-Glycogen debranching enzyme, metazoa IPR017853-Glycoside hydrolase, superfamily IPR013781-Glycoside hydrolase, subgroup, catalytic core IPR010401-Amylo-alpha-1,6-glucosidase IPR008928-Six-hairpin glycosidase-like	Biological Process: carbohydrate metabolic process (GO:0005975), Biological Process: glycogen biosynthetic process (GO:0005978), Molecular Function: 4-alpha-glucanotransferase activity (GO:0004134), Molecular Function: amylo-alpha-1,6-glucosidase activity (GO:0004135), Molecular Function: catalytic activity (GO:0003824), Molecular Function: cation binding (GO:0043169)	sp|P35573|GDE_HUMAN%%Glycogen debranching enzyme OS=Homo sapiens GN=AGL PE=1 SV=3%%0	-	-	Y		0	0	0	3	0	0	0	0	0	0	0	0	0	0	0	0	0	0
	GS_21205	-	-	-	-	Y		-	IPR002085-Alcohol dehydrogenase superfamily, zinc-containing IPR016040-NAD(P)-binding domain IPR013149-Alcohol dehydrogenase, C-terminal IPR013154-Alcohol dehydrogenase GroES-like IPR020843-Polyketide synthase, enoylreductase IPR011032-GroES-like	Biological Process: oxidation-reduction process (GO:0055114), Molecular Function: binding (GO:0005488), Molecular Function: oxidoreductase activity (GO:0016491), Molecular Function: transferase activity, transferring acyl groups other than amino-acyl groups (GO:0016747), Molecular Function: zinc ion binding (GO:0008270)	bmy:Bm1_54505 oxidoreductase, zinc-binding dehydrogenase family protein%388%89.4329896907217%0.0	Y	-	Y		0	0	0	3	0	0	0	0	0	0	0	0	0	0	0	0	0	0
	GS_22069	-	-	-	-	Y		K13126-polyadenylate-binding protein	IPR000504-RNA recognition motif domain IPR006515-Polyadenylate binding protein, human types 1, 2, 3, 4 IPR012677-Nucleotide-binding, alpha-beta plait IPR002004-Polyadenylate-binding protein/Hyperplastic disc protein IPR003954-RNA recognition motif domain, eukaryote	Molecular Function: nucleic acid binding (GO:0003676), Molecular Function: nucleotide binding (GO:0000166), Molecular Function: RNA binding (GO:0003723)	bmy:Bm1_06880 polyadenylate-binding protein 4; K13126 polyadenylate-binding protein%463%92.6565874730022%0.0	-	-	-		0	0	0	3	0	0	0	0	0	0	0	0	0	0	0	0	0	0
	GS_23318	-	-	-	-	Y		-	IPR010987-Glutathione S-transferase, C-terminal-like IPR004046-Glutathione S-transferase, C-terminal IPR012335-Thioredoxin fold IPR012336-Thioredoxin-like fold	-	sp|Q2L969|MTX2_PIG%%Metaxin-2 OS=Sus scrofa GN=MTX2 PE=2 SV=1%%4.1e-66	Y	-	-		0	0	0	3	0	0	0	0	0	0	0	0	0	0	0	0	0	0
	L3E_00704	-	-	-	-	Y		-	IPR018247-EF-Hand 1, calcium-binding site IPR018249-EF-HAND 2 IPR001125-Recoverin IPR011992-EF-hand-like domain	Molecular Function: calcium ion binding (GO:0005509)	-	-	-	-		0	0	0	3	0	0	0	0	0	0	0	0	0	0	0	0	0	0
	GS_00514	-	-	-	-	Y		K03952-NADH dehydrogenase (ubiquinone) 1 alpha subcomplex 8	IPR013892-Cytochrome c oxidase biogenesis protein Cmc1-like	-	Channels and Transporters%gnl|TC-DB|P42029%3%Primary active transporters%3.D.%Oxidoreduction-driven transporters%3.D.1%Oxidoreduction-driven transporters%3.D.1.6.1% H+ or Na+-translocating NADH Dehydrogenase (NDH) Family.%NADH dehydrogenase [ubiquinone] 1 alpha subcomplex subunit 8 - Bos taurus (Bovine).%135%36.2962963%1.00E-18	-	-	-		0	0	0	2	0	0	0	0	0	0	0	0	0	0	0	0	0	0
	GS_00761	-	-	-	-	Y		-	IPR007273-SCAMP	Biological Process: protein transport (GO:0015031), Cellular Component: integral to membrane (GO:0016021)	bmy:Bm1_49815 SCAMP family protein%332%68.6746987951807%1e-116	Y	-	-		0	0	0	2	0	0	0	0	0	0	0	0	0	0	0	0	0	0
	GS_01011	-	-	-	-	Y		K02131-F-type H+-transporting ATPase subunit 6	IPR008387-ATPase, F0 complex, subunit F6, mitochondrial	Biological Process: ATP synthesis coupled proton transport (GO:0015986), Cellular Component: mitochondrial proton-transporting ATP synthase complex, coupling factor F(o) (GO:0000276), Molecular Function: hydrogen ion transmembrane transporter activity (GO:0015078)	cbr:CBG18931 Cbr-atp-4; C. briggsae CBR-ATP-4 protein%135%50.3703703703704%2e-25	-	-	-		0	0	0	2	0	0	0	0	0	0	0	0	0	0	0	0	0	0
	GS_01046	-	-	-	-	Y		-	IPR004686-Tricarboxylate/iron carrier	Biological Process: cation transport (GO:0006812), Biological Process: transmembrane transport (GO:0055085), Cellular Component: membrane (GO:0016020), Molecular Function: cation transmembrane transporter activity (GO:0008324)	Channels and Transporters%gnl|TC-DB|Q63965%2%Electorchemical potential-driven transporters%2.A.%"Porters (uniporters, symporters, antiporters)"%2.A.5% Zinc (Zn2+)-Iron (Fe2+) Permease (ZIP) Family.%2.A.54.1.1% Mitochondrial Tricarboxylate Carrier (MTC) Family.; Zinc (Zn2+)-Iron (Fe2+) Permease (ZIP) Family.%TRICARBOXYLATE CARRIER (FRAGMENT) - Rattus norvegicus (Rat).%313%53.35463259%1.00E-93	Y	-	-		0	0	0	2	0	0	0	0	0	0	0	0	0	0	0	0	0	0
	GS_01572	-	-	-	-	Y		K09553-stress-induced-phosphoprotein 1	IPR011990-Tetratricopeptide-like helical IPR023114-Elongated TPR repeat-containing domain IPR001440-Tetratricopeptide TPR-1 IPR019734-Tetratricopeptide repeat IPR006636-Heat shock chaperonin-binding IPR013026-Tetratricopeptide repeat-containing	Molecular Function: binding (GO:0005488), Molecular Function: protein binding (GO:0005515)	Channels and Transporters%gnl|TC-DB|Q9MUK5%3%Primary active transporters%3.A.%P-P-bond-hydrolysis-driven transporters%3.A.9% Chloroplast Envelope Protein Translocase (CEPT or Tic-Toc) Family.%3.A.9.1.1% Chloroplast Envelope Protein Translocase (CEPT or Tic-Toc) Family.%Toc64 - Pisum sativum (Garden pea).%105%37.14285714%6.00E-11	-	-	-		0	0	0	2	0	0	0	0	0	0	0	0	0	0	0	0	0	0
	GS_01616	-	-	-	-	Y		K01876-aspartyl-tRNA synthetase	IPR016027-Nucleic acid-binding, OB-fold-like IPR004365-Nucleic acid binding, OB-fold, tRNA/helicase-type IPR012340-Nucleic acid-binding, OB-fold IPR018150-Aminoacyl-tRNA synthetase, class II (D/K/N)-like IPR004364-Aminoacyl-tRNA synthetase, class II (D/K/N)	Biological Process: translation (GO:0006412), Biological Process: tRNA aminoacylation for protein translation (GO:0006418), Cellular Component: cytoplasm (GO:0005737), Molecular Function: aminoacyl-tRNA ligase activity (GO:0004812), Molecular Function: ATP binding (GO:0005524), Molecular Function: nucleic acid binding (GO:0003676), Molecular Function: nucleotide binding (GO:0000166)	bmy:Bm1_41230 Aspartyl-tRNA synthetase; K01876 aspartyl-tRNA synthetase [EC:6.1.1.12]%310%70.3225806451613%1e-113	-	-	-		0	0	0	2	0	0	0	0	0	0	0	0	0	0	0	0	0	0
	GS_02105	-	-	-	-	Y		K11353-NADH dehydrogenase (ubiquinone) 1 alpha subcomplex 13	IPR009346-GRIM-19	-	Channels and Transporters%gnl|TC-DB|Q95KV7%3%Primary active transporters%3.D.%Oxidoreduction-driven transporters%3.D.1%Oxidoreduction-driven transporters%3.D.1.6.1% H+ or Na+-translocating NADH Dehydrogenase (NDH) Family.%NADH dehydrogenase [ubiquinone] 1 alpha subcomplex subunit 13 - Bos taurus (Bovine).%129%32.55813953%4.00E-15	Y	-	-		0	0	0	2	0	0	0	0	0	0	0	0	0	0	0	0	0	0
	GS_02127	-	-	-	-	Y		K12947-signal peptidase complex subunit 2	IPR009582-Signal peptidase complex subunit 2	Biological Process: signal peptide processing (GO:0006465), Cellular Component: integral to membrane (GO:0016021), Cellular Component: signal peptidase complex (GO:0005787), Molecular Function: peptidase activity (GO:0008233)	bmy:Bm1_28300 microsomal signal peptidase 25 kDa subunit; K12947 signal peptidase complex subunit 2 [EC:3.4.-.-]%175%75.4285714285714%7e-77	Y	-	-		0	0	0	2	0	0	0	0	0	0	0	0	0	0	0	0	0	0
	GS_02134	-	-	-	-	Y		-	IPR001683-Phox homologous domain	Biological Process: cell communication (GO:0007154), Molecular Function: phosphatidylinositol binding (GO:0035091), Molecular Function: protein binding (GO:0005515)	bmy:Bm1_35995 PX domain containing protein%231%65.3679653679654%7e-86	-	-	-		0	0	0	2	0	0	0	0	0	0	0	0	0	0	0	0	0	0
	GS_02440	-	-	-	-	Y		K11254-histone H4	IPR019809-Histone H4, conserved site IPR007125-Histone core IPR009072-Histone-fold IPR001951-Histone H4	Biological Process: nucleosome assembly (GO:0006334), Cellular Component: nucleosome (GO:0000786), Cellular Component: nucleus (GO:0005634), Molecular Function: DNA binding (GO:0003677)	cfa:486670 similar to germinal histone H4 gene; K11254 histone H4%103%99.0291262135922%4e-51	-	-	-		0	0	0	2	0	0	0	0	0	0	0	0	0	0	0	0	0	0
	GS_02700	-	-	-	-	Y		K07888-Ras-related protein Rab-5B	IPR020851-Small GTPase IPR001806-Ras GTPase IPR013753-Ras IPR002041-Ran GTPase IPR003579-Ras small GTPase, Rab type IPR003578-Small GTPase, Rho type IPR003577-Ras small GTPase, Ras type IPR005225-Small GTP-binding protein domain	Biological Process: GTP catabolic process (GO:0006184), Biological Process: intracellular protein transport (GO:0006886), Biological Process: nucleocytoplasmic transport (GO:0006913), Biological Process: protein transport (GO:0015031), Biological Process: signal transduction (GO:0007165), Biological Process: small GTPase mediated signal transduction (GO:0007264), Cellular Component: intracellular…	GTPase%rab_5 %217%77.8801843317972%3e-96	-	-	-		0	0	0	2	0	0	0	0	0	0	0	0	0	0	0	0	0	0
	GS_02805	-	-	-	-	Y		K00166-2-oxoisovalerate dehydrogenase E1 component, alpha subunit	IPR001017-Dehydrogenase, E1 component	Biological Process: metabolic process (GO:0008152), Molecular Function: oxidoreductase activity, acting on the aldehyde or oxo group of donors, disulfide as acceptor (GO:0016624)	sp|Q8HXY4|ODBA_MACFA%%2-oxoisovalerate dehydrogenase subunit alpha, mitochondrial OS=Macaca fascicularis GN=BCKDHA PE=2 SV=1%%1.1e-201	-	-	Y		0	0	0	2	0	0	0	0	0	0	0	0	0	0	0	0	0	0
	GS_02941	-	-	-	-	Y		-	IPR006694-Fatty acid hydroxylase IPR001199-Cytochrome b5	Biological Process: fatty acid biosynthetic process (GO:0006633), Biological Process: oxidation-reduction process (GO:0055114), Molecular Function: heme binding (GO:0020037), Molecular Function: iron ion binding (GO:0005506), Molecular Function: oxidoreductase activity (GO:0016491)	bmy:Bm1_09690 Fatty acid hydroxylase family protein%313%68.6900958466454%1e-121	Y	-	Y		0	0	0	2	0	0	0	0	0	0	0	0	0	0	0	0	0	0
	GS_03044	-	-	-	-	Y		K02975-small subunit ribosomal protein S25e	IPR004977-Ribosomal protein S25	-	bmy:Bm1_52440 40S ribosomal protein S25; K02975 small subunit ribosomal protein S25e%127%90.5511811023622%1e-43	-	-	-		0	0	0	2	0	0	0	0	0	0	0	0	0	0	0	0	0	0
	GS_03390	-	-	-	-	Y		-	IPR017936-Thioredoxin-like IPR012335-Thioredoxin fold IPR017937-Thioredoxin, conserved site IPR013766-Thioredoxin domain IPR012336-Thioredoxin-like fold	Biological Process: cell redox homeostasis (GO:0045454)	cel:F46E10.9 dpy-11; DumPY : shorter than wild-type family member (dpy-11)%189%79.3650793650794%1e-88	Y	-	-		0	0	0	2	0	0	0	0	0	0	0	0	0	0	0	0	0	0
	GS_03974	-	-	-	-	Y		K03937-NADH dehydrogenase (ubiquinone) Fe-S protein 4	IPR006885-NADH dehydrogenase ubiquinone Fe-S protein 4, mitochondrial	Biological Process: electron transport chain (GO:0022900), Cellular Component: mitochondrial inner membrane (GO:0005743), Molecular Function: oxidoreductase activity, acting on NADH or NADPH (GO:0016651)	Channels and Transporters%gnl|TC-DB|Q02375%3%Primary active transporters%3.D.%Oxidoreduction-driven transporters%3.D.1%Oxidoreduction-driven transporters%3.D.1.6.1% H+ or Na+-translocating NADH Dehydrogenase (NDH) Family.%"NADH dehydrogenase [ubiquinone] iron-sulfur protein 4, mitochondrial - Bos taurus (Bovine)."%128%58.59375%7.00E-39	-	-	-		0	0	0	2	0	0	0	0	0	0	0	0	0	0	0	0	0	0
	GS_04321	-	-	-	-	Y		-	IPR001715-Calponin homology domain	Molecular Function: protein binding (GO:0005515)	sp|Q9FKI0|FIMB2_ARATH%%Fimbrin-like protein 2 OS=Arabidopsis thaliana GN=FIM2 PE=2 SV=1%%6.2e-85	-	-	-		0	0	0	2	0	0	0	0	0	0	0	0	0	0	0	0	0	0
	GS_04569	-	-	-	-	Y		-	IPR016024-Armadillo-type fold IPR011989-Armadillo-like helical IPR000357-HEAT IPR021133-HEAT, type 2	Molecular Function: binding (GO:0005488), Molecular Function: protein binding (GO:0005515)	bmy:Bm1_44525 HsGCN1%1846%62.4052004333694%0.0	Y	-	Y		0	0	0	2	0	0	0	0	0	0	0	0	0	0	0	0	0	0
	GS_04734	-	-	-	-	Y		K02915-large subunit ribosomal protein L34e	IPR008195-Ribosomal protein L34Ae IPR018065-Ribosomal protein L34e, conserved site	Biological Process: translation (GO:0006412), Cellular Component: intracellular (GO:0005622), Cellular Component: ribosome (GO:0005840), Molecular Function: structural constituent of ribosome (GO:0003735)	bmy:Bm1_29260 60S ribosomal protein L34; K02915 large subunit ribosomal protein L34e%114%90.3508771929825%2e-51	-	-	-		0	0	0	2	0	0	0	0	0	0	0	0	0	0	0	0	0	0
	GS_05274	-	-	-	-	Y		K09569-FK506-binding protein 2	IPR001179-Peptidyl-prolyl cis-trans isomerase, FKBP-type, domain IPR023566-Peptidyl-prolyl cis-trans isomerase, FKBP-type	Biological Process: protein folding (GO:0006457)	cel:F36H1.1 fkb-1; FK506-Binding protein family member (fkb-1); K09569 FK506-binding protein 2 [EC:5.2.1.8]%134%69.4029850746269%1e-49	-	Y	-		0	0	0	2	0	0	0	0	0	0	0	0	0	0	0	0	0	0
	GS_05647	-	-	-	-	Y		-	IPR004152-GAT IPR018205-VHS subgroup IPR008942-ENTH/VHS IPR002014-VHS	Biological Process: intracellular protein transport (GO:0006886), Cellular Component: intracellular (GO:0005622)	bmy:Bm1_39235 VHS domain containing protein%430%61.6279069767442%1e-148	-	-	Y		0	0	0	2	0	0	0	0	0	0	0	0	0	0	0	0	0	0
	GS_07503	-	-	-	-	Y		K10359-myosin VII	IPR000048-IQ motif, EF-hand binding site IPR001609-Myosin head, motor domain	Cellular Component: myosin complex (GO:0016459), Molecular Function: ATP binding (GO:0005524), Molecular Function: motor activity (GO:0003774), Molecular Function: protein binding (GO:0005515)	cel:T10H10.1 hum-6; Heavy chain, Unconventional Myosin family member (hum-6); K10359 myosin VII%800%66%0.0	-	-	Y		0	0	0	2	0	0	0	0	0	0	0	0	0	0	0	0	0	0
	GS_07930	-	-	-	-	Y		K04507-calcyclin binding protein	IPR015120-Siah interacting protein, N-terminal IPR007699-SGS IPR007052-CS-like domain IPR017447-CS domain IPR008978-HSP20-like chaperone	-	bmy:Bm1_00445 calcyclin binding protein-like; K04507 calcyclin binding protein%190%49.4736842105263%2e-39	-	-	-		0	0	0	2	0	0	0	0	0	0	0	0	0	0	0	0	0	0
	GS_08081	-	-	-	-	Y		K10082-lectin, mannose-binding 2	IPR013320-Concanavalin A-like lectin/glucanase, subgroup IPR008985-Concanavalin A-like lectin/glucanase IPR005052-Legume-like lectin	Cellular Component: membrane (GO:0016020)	Channels and Transporters%gnl|TC-DB|Q62902%1%Channel/pores%1.A.%alpha-type channels%1.A.6%ENaC/P2X Superfamily%1.A.6.1.8% Epithelial Na+ Channel (ENaC) Family.%Protein ERGIC-53 OS=Rattus norvegicus GN=Lman1 PE=1 SV=1%211%33.6492891%5.00E-33	Y	-	-		0	0	0	2	0	0	0	0	0	0	0	0	0	0	0	0	0	0
	GS_08429	-	-	-	-	Y		K02731-20S proteasome subunit alpha 4	IPR023332-Proteasome A-type subunit IPR000426-Proteasome, alpha-subunit, conserved site IPR001353-Proteasome, subunit alpha/beta	Biological Process: proteolysis involved in cellular protein catabolic process (GO:0051603), Biological Process: ubiquitin-dependent protein catabolic process (GO:0006511), Cellular Component: proteasome core complex (GO:0005839), Cellular Component: proteasome core complex, alpha-subunit complex (GO:0019773), Molecular Function: endopeptidase activity (GO:0004175), Molecular Function: threonine-…	bmy:Bm1_49465 Proteasome subunit alpha type 7-1; K02731 20S proteasome subunit alpha 4 [EC:3.4.25.1]%254%90.9448818897638%1e-127	-	-	-		0	0	0	2	0	0	0	0	0	0	0	0	0	0	0	0	0	0
	GS_08433	-	-	-	-	Y		-	IPR019389-Selenoprotein T IPR012335-Thioredoxin fold IPR011893-Selenoprotein, Rdx type IPR012336-Thioredoxin-like fold	Biological Process: cell redox homeostasis (GO:0045454), Molecular Function: selenium binding (GO:0008430)	bmy:Bm1_33385 selT/selW/selH selenoprotein domain containing protein%227%71.3656387665198%6e-92	Y	-	Y		0	0	0	2	0	0	0	0	0	0	0	0	0	0	0	0	0	0
	GS_08780	-	-	-	-	Y		K12470-SH3 domain-containing kinase-binding protein 1	IPR001452-Src homology-3 domain IPR011511-Variant SH3	Molecular Function: protein binding (GO:0005515)	bmy:Bm1_05445 Variant SH3 domain containing protein%444%42.3423423423423%2e-75	-	-	-		0	0	0	2	0	0	0	0	0	0	0	0	0	0	0	0	0	0
	GS_09644	-	-	-	-	Y		K07140-NO DESCRIPTION	IPR011037-Pyruvate kinase-like, insert domain IPR005302-Molybdenum cofactor sulfurase, C-terminal IPR005303-MOSC, N-terminal beta barrel	Molecular Function: catalytic activity (GO:0003824), Molecular Function: molybdenum ion binding (GO:0030151), Molecular Function: pyridoxal phosphate binding (GO:0030170)	sp|B0Y691|MOCOS_ASPFC%%Molybdenum cofactor sulfurase OS=Aspergillus fumigatus (strain CEA10 / CBS 144.89 / FGSC A1163) GN=hxB PE=3 SV=1%%2.1e-92	Y	-	Y		0	0	0	2	0	0	0	0	0	0	0	0	0	0	0	0	0	0
	GS_10316	-	-	-	-	Y		K03242-translation initiation factor 2 subunit 3	IPR009000-Translation elongation/initiation factor/Ribosomal, beta-barrel IPR009001-Translation elongation factor EF1A/initiation factor IF2gamma, C-terminal IPR015256-Translation initiation factor 2, gamma subunit, C-terminal IPR000795-Protein synthesis factor, GTP-binding IPR004161-Translation elongation factor EFTu/EF1A, domain 2	Molecular Function: GTP binding (GO:0005525), Molecular Function: GTPase activity (GO:0003924)	GTPase%Y39G10AR.8 %459%84.9673202614379%0.0	-	-	Y		0	0	0	2	0	0	0	0	0	0	0	0	0	0	0	0	0	0
	GS_10536	-	-	-	-	Y		-	IPR018506-Cytochrome b5, heme-binding site IPR001199-Cytochrome b5	Molecular Function: heme binding (GO:0020037)	bmy:Bm1_32920 Cytochrome b5-like Heme/Steroid binding domain containing protein%139%57.5539568345324%1e-37	Y	-	-		0	0	0	2	0	0	0	0	0	0	0	0	0	0	0	0	0	0
	GS_10974	-	-	-	-	Y		-	IPR021911-ATPase family AAA domain-containing protein 3, domain of unknown function DUF3523 IPR003593-ATPase, AAA+ type, core IPR003959-ATPase, AAA-type, core	Molecular Function: ATP binding (GO:0005524), Molecular Function: nucleoside-triphosphatase activity (GO:0017111), Molecular Function: nucleotide binding (GO:0000166)	Channels and Transporters%gnl|TC-DB|P25694%3%Primary active transporters%3.A.%P-P-bond-hydrolysis-driven transporters%3.A.1% ATP-binding Cassette (ABC) Superfamily.%3.A.16.1.2% ATP-binding Cassette (ABC) Superfamily.; Endoplasmic Reticular Retrotranslocon (ER-RT) Family.%Cell division control protein 48 - Saccharomyces cerevisiae (Baker's yeast).%224%28.57142857%8.00E-14	-	-	-		0	0	0	2	0	0	0	0	0	0	0	0	0	0	0	0	0	0
	GS_11148	-	-	-	-	Y		-	IPR004240-Nonaspanin (TM9SF)	Cellular Component: integral to membrane (GO:0016021)	bmy:Bm1_34290 Transmembrane 9 superfamily protein member 2 precursor, putative%517%80.4642166344294%0.0	Y	-	-		0	0	0	2	0	0	0	0	0	0	0	0	0	0	0	0	0	0
	GS_11945	-	-	-	-	Y		K09485-heat shock protein 110kDa	IPR013126-Heat shock protein 70 IPR001023-Heat shock protein Hsp70 IPR018181-Heat shock protein 70, conserved site	Molecular Function: ATP binding (GO:0005524)	Channels and Transporters%gnl|TC-DB|P08107%1%Channel/pores%1.A.%alpha-type channels%1.A.3% Voltage-gated Ion Channel (VIC) Superfamily .%1.A.33.1.3%" Cation Channel-forming Heat Shock Protein-70 (Hsp70) Family.; Ryanodine-Inositol 1,4,5-triphosphate Receptor Ca2+ Channel (RIR-CaC) Family."%Heat shock 70 kDa protein 1 (HSP70.1) (HSP70-1/HSP70-2) - Homo sapiens (Human).%685%27.44525547%5.00E-59	-	-	-		0	0	0	2	0	0	0	0	0	0	0	0	0	0	0	0	0	0
	GS_12015	-	-	-	-	Y		-	IPR004009-Myosin, N-terminal, SH3-like IPR001609-Myosin head, motor domain	Cellular Component: myosin complex (GO:0016459), Molecular Function: ATP binding (GO:0005524), Molecular Function: motor activity (GO:0003774)	cbr:CBG22283 Cbr-spe-15; C. briggsae CBR-SPE-15 protein; K10358 myosin VI%642%56.8535825545171%0.0	Y	-	Y		0	0	0	2	0	0	0	0	0	0	0	0	0	0	0	0	0	0
	GS_12318	-	-	-	-	Y		-	IPR019345-Armet protein IPR008139-Saposin B	-	bmy:Bm1_31775 ARMET-like protein precursor%159%71.0691823899371%6e-62	-	Y	-		0	0	0	2	0	0	0	0	0	0	0	0	0	0	0	0	0	0
	GS_12891	-	-	-	-	Y		-	-	-	sp|A6QGQ6|PLSY_STAAE%%Glycerol-3-phosphate acyltransferase OS=Staphylococcus aureus (strain Newman) GN=plsY PE=3 SV=1%%2.1e-38	Y	-	-		0	0	0	2	0	0	0	0	0	0	0	0	0	0	0	0	0	0
	GS_13179	-	-	-	-	Y		-	-	-	cbr:CBG13520 Cbr-dsc-4; C. briggsae CBR-DSC-4 protein; K14463 microsomal triglyceride transfer protein large subunit%381%33.5958005249344%7e-53	-	Y	-		0	0	0	2	0	0	0	0	0	0	0	0	0	0	0	0	0	0
	GS_13329	-	-	-	-	Y		K00415-ubiquinol-cytochrome c reductase core subunit 2	IPR011237-Peptidase M16, core IPR007863-Peptidase M16, C-terminal IPR011765-Peptidase M16, N-terminal IPR011249-Metalloenzyme, LuxS/M16 peptidase-like, metal-binding	Biological Process: proteolysis (GO:0006508), Molecular Function: catalytic activity (GO:0003824), Molecular Function: metal ion binding (GO:0046872), Molecular Function: metalloendopeptidase activity (GO:0004222), Molecular Function: zinc ion binding (GO:0008270)	bmy:Bm1_37260 Peptidase M16 inactive domain containing protein; K00415 ubiquinol-cytochrome c reductase core subunit 2 [EC:1.10.2.2]%455%48.3516483516484%1e-120	-	-	Y		0	0	0	2	0	0	0	0	0	0	0	0	0	0	0	0	0	0
	GS_14131	-	-	-	-	Y		K03940-NADH dehydrogenase (ubiquinone) Fe-S protein 7	IPR006137-NADH:ubiquinone oxidoreductase-like, 20kDa subunit IPR006138-NADH-ubiquinone oxidoreductase, 20 Kd subunit IPR014406-[NiFe]-hydrogenase-3-type complex, small subunit/NADH:quinone oxidoreductase, subunit NuoB	Biological Process: oxidation-reduction process (GO:0055114), Molecular Function: 4 iron, 4 sulfur cluster binding (GO:0051539), Molecular Function: NADH dehydrogenase (ubiquinone) activity (GO:0008137), Molecular Function: oxidoreductase activity, acting on NADH or NADPH (GO:0016651), Molecular Function: quinone binding (GO:0048038)	Channels and Transporters%gnl|TC-DB|P42026%3%Primary active transporters%3.D.%Oxidoreduction-driven transporters%3.D.1%Oxidoreduction-driven transporters%3.D.1.6.1% H+ or Na+-translocating NADH Dehydrogenase (NDH) Family.%"NADH dehydrogenase [ubiquinone] iron-sulfur protein 7, mitochondrial - Bos taurus (Bovine)."%96%75%2.00E-44	-	-	Y		0	0	0	2	0	0	0	0	0	0	0	0	0	0	0	0	0	0
	GS_14190	-	-	-	-	Y		K03233-elongation factor 1-gamma	IPR010987-Glutathione S-transferase, C-terminal-like IPR004046-Glutathione S-transferase, C-terminal IPR012335-Thioredoxin fold IPR017933-Glutathione S-transferase/chloride channel, C-terminal IPR001662-Translation elongation factor EF1B, gamma chain, conserved	Biological Process: translational elongation (GO:0006414), Cellular Component: eukaryotic translation elongation factor 1 complex (GO:0005853), Molecular Function: translation elongation factor activity (GO:0003746)	bmy:Bm1_51865 Elongation factor 1 gamma, conserved domain containing protein; K03233 elongation factor EF-1 gamma subunit%421%69.833729216152%1e-179	-	-	-		0	0	0	2	0	0	0	0	0	0	0	0	0	0	0	0	0	0
	GS_14401	-	-	-	-	Y		K12812-ATP-dependent RNA helicase UAP56/SUB2	IPR014001-DEAD-like helicase IPR011545-DNA/RNA helicase, DEAD/DEAH box type, N-terminal IPR014014-RNA helicase, DEAD-box type, Q motif	Molecular Function: ATP binding (GO:0005524), Molecular Function: ATP-dependent helicase activity (GO:0008026), Molecular Function: nucleic acid binding (GO:0003676)	Channels and Transporters%gnl|TC-DB|Q13838%3%Primary active transporters%3.A.%P-P-bond-hydrolysis-driven transporters%3.A.1% ATP-binding Cassette (ABC) Superfamily.%3.A.18.1.1% ATP-binding Cassette (ABC) Superfamily.; Nuclear mRNA Exporter (mRNA-E) Family.%Spliceosome RNA helicase BAT1 - Homo sapiens (Human).%261%77.01149425%1.00E-119	-	-	-		0	0	0	2	0	0	0	0	0	0	0	0	0	0	0	0	0	0
	GS_14467	-	-	-	-	Y		K09497-T-complex protein 1 subunit epsilon	IPR002194-Chaperonin TCP-1, conserved site IPR002423-Chaperonin Cpn60/TCP-1 IPR017998-Chaperone, tailless complex polypeptide 1 IPR012718-T-complex protein 1, epsilon subunit	Biological Process: cellular protein metabolic process (GO:0044267), Biological Process: protein folding (GO:0006457), Molecular Function: ATP binding (GO:0005524), Molecular Function: unfolded protein binding (GO:0051082)	bmy:Bm1_47485 T-complex protein 1, epsilon subunit; K09497 T-complex protein 1 subunit epsilon%537%84.9162011173184%0.0	-	-	Y		0	0	0	2	0	0	0	0	0	0	0	0	0	0	0	0	0	0
	GS_14498	-	-	-	-	Y		K02964-small subunit ribosomal protein S18e	IPR010979-Ribosomal protein S13-like, H2TH IPR018269-Ribosomal protein S13, conserved site IPR001892-Ribosomal protein S13	Biological Process: translation (GO:0006412), Cellular Component: intracellular (GO:0005622), Cellular Component: ribosome (GO:0005840), Molecular Function: nucleic acid binding (GO:0003676), Molecular Function: RNA binding (GO:0003723), Molecular Function: structural constituent of ribosome (GO:0003735)	bmy:Bm1_46915 40S ribosomal protein S18; K02964 small subunit ribosomal protein S18e%154%94.1558441558442%5e-82	-	-	-		0	0	0	2	0	0	0	0	0	0	0	0	0	0	0	0	0	0
	GS_15007	-	-	-	-	Y		-	IPR002645-Sulphate transporter/antisigma-factor antagonist STAS IPR011547-Sulphate transporter	Biological Process: transmembrane transport (GO:0055085), Biological Process: transport (GO:0006810), Cellular Component: integral to membrane (GO:0016021), Molecular Function: transporter activity (GO:0005215)	Channels and Transporters%gnl|TC-DB|A0FKN5%2%Electorchemical potential-driven transporters%2.A.%"Porters (uniporters, symporters, antiporters)"%2.A.5% Zinc (Zn2+)-Iron (Fe2+) Permease (ZIP) Family.%2.A.53.2.9% Sulfate Permease (SulP) Family.; Zinc (Zn2+)-Iron (Fe2+) Permease (ZIP) Family.%Prestin - Gallus gallus (Chicken).%384%26.04166667%2.00E-25	Y	-	-		0	0	0	2	0	0	0	0	0	0	0	0	0	0	0	0	0	0
	GS_15057	-	-	-	-	Y		-	IPR000980-SH2 motif IPR002290-Serine/threonine-protein kinase domain IPR020635-Tyrosine-protein kinase, catalytic domain IPR001452-Src homology-3 domain IPR001245-Serine-threonine/tyrosine-protein kinase IPR000719-Protein kinase, catalytic domain IPR008266-Tyrosine-protein kinase, active site IPR011009-Protein kinase-like domain IPR011511-Variant SH3 IPR017441-Protein kinase, ATP binding site	Biological Process: protein phosphorylation (GO:0006468), Molecular Function: ATP binding (GO:0005524), Molecular Function: protein binding (GO:0005515), Molecular Function: protein kinase activity (GO:0004672), Molecular Function: protein serine/threonine kinase activity (GO:0004674), Molecular Function: protein tyrosine kinase activity (GO:0004713), Molecular Function: transferase activity, tra…	ks-sarfari_kinase%v-yes-1 Yamaguchi sarcoma viral related oncogene homolog%TK%Src%SrcB%9606%hLYN_2111%210%58.5714285714286%1e-68	-	-	-		0	0	0	2	0	0	0	0	0	0	0	0	0	0	0	0	0	0
	GS_15148	-	-	-	-	Y		K12886-heterogeneous nuclear ribonucleoprotein K	IPR004087-K Homology IPR004088-K Homology, type 1 IPR018111-K Homology, type 1, subgroup	Molecular Function: RNA binding (GO:0003723)	bmy:Bm1_48315 KH domain containing protein; K12886 heterogeneous nuclear ribonucleoprotein K%139%62.589928057554%1e-42	-	-	-		0	0	0	2	0	0	0	0	0	0	0	0	0	0	0	0	0	0
	GS_15341	-	-	-	-	Y		-	-	-	sp|Q9BPN8|Y92H3_CAEEL%%Uncharacterized protein Y92H12BR.3 OS=Caenorhabditis elegans GN=Y92H12BR.3 PE=1 SV=2%%4.7e-29	Y	-	-		0	0	0	2	0	0	0	0	0	0	0	0	0	0	0	0	0	0
	GS_15658	-	-	-	-	Y		K02943-large subunit ribosomal protein LP2	IPR001813-Ribosomal protein 60S	Biological Process: translational elongation (GO:0006414), Cellular Component: intracellular (GO:0005622), Cellular Component: ribosome (GO:0005840), Molecular Function: structural constituent of ribosome (GO:0003735)	bmy:Bm1_39555 60s Acidic ribosomal protein%118%57.6271186440678%2e-23	-	-	-		0	0	0	2	0	0	0	0	0	0	0	0	0	0	0	0	0	0
	GS_16262	-	-	-	-	Y		K07374-tubulin alpha	IPR018316-Tubulin/FtsZ, 2-layer sandwich domain IPR002452-Alpha tubulin IPR008280-Tubulin/FtsZ, C-terminal IPR003008-Tubulin/FtsZ, GTPase domain IPR000217-Tubulin IPR023123-Tubulin, C-terminal IPR017975-Tubulin, conserved site	Biological Process: GTP catabolic process (GO:0006184), Biological Process: microtubule-based movement (GO:0007018), Biological Process: microtubule-based process (GO:0007017), Biological Process: protein polymerization (GO:0051258), Cellular Component: microtubule (GO:0005874), Cellular Component: protein complex (GO:0043234), Molecular Function: GTP binding (GO:0005525), Molecular Function: GTP…	bmy:Bm1_38680 tubulin alpha chain - mouse; K07374 tubulin alpha%439%97.0387243735763%0.0	Y	-	Y		0	0	0	2	0	0	0	0	0	0	0	0	0	0	0	0	0	0
	GS_16406	-	-	-	-	Y		-	-	-	F48C1.6%CE10742 WBGene00018599 status:Confirmed UniProt:O01572_CAEEL protein_id:AAB52342.1%HMM_hit%1.1e-78	Y	-	-		0	0	0	2	0	0	0	0	0	0	0	0	0	0	0	0	0	0
	GS_17273	-	-	-	-	Y		K01228-mannosyl-oligosaccharide glucosidase	IPR004888-Glycoside hydrolase, family 63 IPR008928-Six-hairpin glycosidase-like	Biological Process: oligosaccharide metabolic process (GO:0009311), Molecular Function: catalytic activity (GO:0003824), Molecular Function: mannosyl-oligosaccharide glucosidase activity (GO:0004573)	bmy:Bm1_40265 Mannosyl oligosaccharide glucosidase family protein; K01228 mannosyl-oligosaccharide glucosidase [EC:3.2.1.106]%757%53.1043593130779%0.0	Y	-	-		0	0	0	2	0	0	0	0	0	0	0	0	0	0	0	0	0	0
	GS_17485	-	-	-	-	Y		K00030-isocitrate dehydrogenase (NAD+)	IPR001804-Isocitrate/isopropylmalate dehydrogenase IPR019818-Isocitrate/isopropylmalate dehydrogenase, conserved site IPR004434-Isocitrate dehydrogenase NAD-dependent	Biological Process: oxidation-reduction process (GO:0055114), Biological Process: tricarboxylic acid cycle (GO:0006099), Molecular Function: isocitrate dehydrogenase (NAD+) activity (GO:0004449), Molecular Function: magnesium ion binding (GO:0000287), Molecular Function: NAD binding (GO:0051287), Molecular Function: oxidoreductase activity, acting on the CH-OH group of donors, NAD or NADP as acce…	sp|Q51375|LEU3_PSEAE%%3-isopropylmalate dehydrogenase OS=Pseudomonas aeruginosa GN=leuB PE=3 SV=2%%2.1e-136	-	-	Y		0	0	0	2	0	0	0	0	0	0	0	0	0	0	0	0	0	0
	GS_18090	-	-	-	-	Y		-	IPR001753-Crotonase, core	Biological Process: metabolic process (GO:0008152), Molecular Function: catalytic activity (GO:0003824)	cbr:CBG06178 Cbr-ech-2; C. briggsae CBR-ECH-2 protein%303%46.5346534653465%1e-73	-	-	Y		0	0	0	2	0	0	0	0	0	0	0	0	0	0	0	0	0	0
	GS_18216	-	-	-	-	Y		-	IPR001972-Stomatin IPR001107-Band 7 protein	Cellular Component: membrane (GO:0016020)	Channels and Transporters%gnl|TC-DB|O59180%8%Accessory factors involved in transport%8.A.%Auxillary transport proteins%8.A.2% Secretin Auxiliary Lipoprotein (SAL) Family.%8.A.21.2.1% Secretin Auxiliary Lipoprotein (SAL) Family.; Stomatin/Podocin/Band 7/Nephrosis.2/SPFH (Stomatin) Family.%Hypothetical protein PH1511 - Pyrococcus horikoshii.%204%35.78431373%4.00E-25	Y	-	Y		0	0	0	2	0	0	0	0	0	0	0	0	0	0	0	0	0	0
	GS_18369	-	-	-	-	Y		K12759-myosin regulatory light chain, invertebrate	IPR002048-Calcium-binding EF-hand IPR018247-EF-Hand 1, calcium-binding site IPR018249-EF-HAND 2 IPR018248-EF-hand IPR011992-EF-hand-like domain	Molecular Function: calcium ion binding (GO:0005509)	Channels and Transporters%gnl|TC-DB|P06704%9%Incompletely characterized transport systems%9.A.%Recognized transporters of unknown biochemical mechanism%9.A.1% Non ABC Multidrug Exporter (N-MDE) Family.%9.A.14.1.1% Non ABC Multidrug Exporter (N-MDE) Family.; Nuclear Pore Complex (NPC) Family.%Cell division control protein 31 - Saccharomyces cerevisiae (Baker's yeast).%116%34.48275862%1.00E-13	-	-	-		0	0	0	2	0	0	0	0	0	0	0	0	0	0	0	0	0	0
	GS_19238	-	-	-	-	Y		K09499-T-complex protein 1 subunit eta	IPR002194-Chaperonin TCP-1, conserved site IPR012720-T-complex protein 1, eta subunit IPR002423-Chaperonin Cpn60/TCP-1 IPR017998-Chaperone, tailless complex polypeptide 1	Biological Process: cellular protein metabolic process (GO:0044267), Biological Process: protein folding (GO:0006457), Molecular Function: ATP binding (GO:0005524), Molecular Function: unfolded protein binding (GO:0051082)	bmy:Bm1_22985 T-complex protein 1, eta subunit; K09499 T-complex protein 1 subunit eta%532%80.4511278195489%0.0	-	-	Y		0	0	0	2	0	0	0	0	0	0	0	0	0	0	0	0	0	0
	GS_19507	-	-	-	-	Y		K01674-carbonic anhydrase	IPR018338-Carbonic anhydrase, alpha-class, conserved site IPR023561-Carbonic anhydrase, alpha-class IPR001148-Carbonic anhydrase, alpha-class, catalytic domain	Biological Process: one-carbon metabolic process (GO:0006730), Molecular Function: carbonate dehydratase activity (GO:0004089), Molecular Function: zinc ion binding (GO:0008270)	bmy:Bm1_34100 Eukaryotic-type carbonic anhydrase family protein; K01672 carbonic anhydrase [EC:4.2.1.1]%144%43.0555555555556%2e-27	-	Y	-		0	0	0	2	0	0	0	0	0	0	0	0	0	0	0	0	0	0
	GS_19557	-	-	-	-	Y		K03935-NADH dehydrogenase (ubiquinone) Fe-S protein 2	IPR010219-NADH dehydrogenase I, subunit D IPR001135-NADH-quinone oxidoreductase, subunit D IPR014029-NADH:ubiquinone oxidoreductase, 49kDa subunit, conserved site IPR022885-NAD(P)H-quinone oxidoreductase subunit D/H	Biological Process: oxidation-reduction process (GO:0055114), Molecular Function: NAD binding (GO:0051287), Molecular Function: oxidoreductase activity, acting on NADH or NADPH (GO:0016651), Molecular Function: quinone binding (GO:0048038)	Channels and Transporters%gnl|TC-DB|P17694%3%Primary active transporters%3.D.%Oxidoreduction-driven transporters%3.D.1%Oxidoreduction-driven transporters%3.D.1.6.1% H+ or Na+-translocating NADH Dehydrogenase (NDH) Family.%"NADH dehydrogenase [ubiquinone] iron-sulfur protein 2, mitochondrial - Bos taurus (Bovine)."%391%69.56521739%1.00E-175	Y	-	-		0	0	0	2	0	0	0	0	0	0	0	0	0	0	0	0	0	0
	GS_19630	-	-	-	-	Y		K02880-large subunit ribosomal protein L17e	IPR005721-Ribosomal protein L22/L17, eukaryotic/archaeal IPR018260-Ribosomal protein L22/L17, conserved site IPR001063-Ribosomal protein L22/L17	Biological Process: translation (GO:0006412), Cellular Component: intracellular (GO:0005622), Cellular Component: large ribosomal subunit (GO:0015934), Cellular Component: ribosome (GO:0005840), Molecular Function: structural constituent of ribosome (GO:0003735)	bmy:Bm1_06635 60S ribosomal protein L17; K02880 large subunit ribosomal protein L17e%186%93.010752688172%1e-94	-	-	-		0	0	0	2	0	0	0	0	0	0	0	0	0	0	0	0	0	0
	GS_19908	-	-	-	-	Y		K14210-solute carrier family 3 (neutral and basic amino acid transporter), member 1	IPR015902-Alpha amylase IPR017853-Glycoside hydrolase, superfamily IPR013781-Glycoside hydrolase, subgroup, catalytic core IPR006047-Glycosyl hydrolase, family 13, catalytic domain IPR006589-Glycosyl hydrolase, family 13, subfamily, catalytic domain	Biological Process: carbohydrate metabolic process (GO:0005975), Molecular Function: catalytic activity (GO:0003824), Molecular Function: cation binding (GO:0043169)	Channels and Transporters%gnl|TC-DB|Q05839%8%Accessory factors involved in transport%8.A.%Auxillary transport proteins%8.A.5% Voltage-gated K+ Channel beta-subunit (Kvbeta) Family.%8.A.9.1.1% rBAT Transport Accessory Protein (rBAT) Family.%AMINO ACID TRANSPORT RELATED PROTEIN (RBAT) - Oryctolagus cuniculus (Rabbit).%588%26.19047619%3.00E-44	Y	-	Y		0	0	0	2	0	0	0	0	0	0	0	0	0	0	0	0	0	0
	GS_19991	-	-	-	-	Y		K02940-large subunit ribosomal protein L9e	IPR000702-Ribosomal protein L6 IPR020040-Ribosomal protein L6, alpha-beta domain IPR002359-Ribosomal protein L6, conserved site-2	Biological Process: translation (GO:0006412), Cellular Component: intracellular (GO:0005622), Cellular Component: ribosome (GO:0005840), Molecular Function: rRNA binding (GO:0019843), Molecular Function: structural constituent of ribosome (GO:0003735)	bmy:Bm1_57375 60S ribosomal protein L9; K02940 large subunit ribosomal protein L9e%187%86.6310160427808%7e-94	-	-	-		0	0	0	2	0	0	0	0	0	0	0	0	0	0	0	0	0	0
	GS_20304	-	-	-	-	Y		-	-	-	cel:F38B2.1 ifa-1; Intermediate Filament, A family member (ifa-1)%50%64%2e-07	-	-	-		0	0	0	2	0	0	0	0	0	0	0	0	0	0	0	0	0	0
	GS_20640	-	-	-	-	Y		K04567-lysyl-tRNA synthetase, class II	IPR016027-Nucleic acid-binding, OB-fold-like IPR004365-Nucleic acid binding, OB-fold, tRNA/helicase-type IPR002313-Lysyl-tRNA synthetase, class II IPR018149-Lysyl-tRNA synthetase, class II, C-terminal IPR012340-Nucleic acid-binding, OB-fold IPR006195-Aminoacyl-tRNA synthetase, class II IPR004364-Aminoacyl-tRNA synthetase, class II (D/K/N) IPR018150-Aminoacyl-tRNA synthetase, class II (D/K/N)-like	Biological Process: lysyl-tRNA aminoacylation (GO:0006430), Biological Process: translation (GO:0006412), Biological Process: tRNA aminoacylation for protein translation (GO:0006418), Cellular Component: cytoplasm (GO:0005737), Molecular Function: aminoacyl-tRNA ligase activity (GO:0004812), Molecular Function: ATP binding (GO:0005524), Molecular Function: lysine-tRNA ligase activity (GO:0004824)…	bmy:Bm1_16500 lysyl-tRNA synthetase; K04567 lysyl-tRNA synthetase, class II [EC:6.1.1.6]%542%77.3062730627306%0.0	-	-	Y		0	0	0	2	0	0	0	0	0	0	0	0	0	0	0	0	0	0
	GS_20654	-	-	-	-	Y		K01847-methylmalonyl-CoA mutase	IPR014348-Cobalamin (vitamin B12)-dependent enzyme, catalytic subdomain IPR006158-Cobalamin (vitamin B12)-binding IPR006098-Methylmalonyl-CoA mutase, alpha chain, catalytic IPR006099-Methylmalonyl-CoA mutase, alpha/beta chain, catalytic IPR006159-Methylmalonyl-CoA mutase, C-terminal IPR016176-Cobalamin (vitamin B12)-dependent enzyme, catalytic	Biological Process: metabolic process (GO:0008152), Molecular Function: catalytic activity (GO:0003824), Molecular Function: cobalamin binding (GO:0031419), Molecular Function: intramolecular transferase activity (GO:0016866), Molecular Function: isomerase activity (GO:0016853), Molecular Function: metal ion binding (GO:0046872), Molecular Function: methylmalonyl-CoA mutase activity (GO:0004494)	cel:ZK1058.1 mmcm-1; MethylMalonylCoA Mutase homolog family member (mmcm-1); K01847 methylmalonyl-CoA mutase [EC:5.4.99.2]%731%78.9329685362517%0.0	-	-	Y		0	0	0	2	0	0	0	0	0	0	0	0	0	0	0	0	0	0
	GS_20833	-	-	-	-	Y		K03942-NADH dehydrogenase (ubiquinone) flavoprotein 1	IPR011538-NADH:ubiquinone oxidoreductase, 51kDa subunit IPR019575-NADH ubiquinone oxidoreductase, F subunit, iron sulphur binding IPR001949-NADH:ubiquinone oxidoreductase, 51kDa subunit, conserved site IPR011537-NADH ubiquinone oxidoreductase, F subunit IPR019554-Soluble ligand binding domain	Biological Process: oxidation-reduction process (GO:0055114), Molecular Function: 4 iron, 4 sulfur cluster binding (GO:0051539), Molecular Function: FMN binding (GO:0010181), Molecular Function: NAD binding (GO:0051287), Molecular Function: NADH dehydrogenase (ubiquinone) activity (GO:0008137), Molecular Function: oxidoreductase activity, acting on NADH or NADPH (GO:0016651)	Channels and Transporters%gnl|TC-DB|P25708%3%Primary active transporters%3.D.%Oxidoreduction-driven transporters%3.D.1%Oxidoreduction-driven transporters%3.D.1.6.1% H+ or Na+-translocating NADH Dehydrogenase (NDH) Family.%"NADH dehydrogenase [ubiquinone] flavoprotein 1, mitochondrial - Bos taurus (Bovine)."%424%78.30188679%0	Y	-	Y		0	0	0	2	0	0	0	0	0	0	0	0	0	0	0	0	0	0
	GS_21025	-	-	-	-	Y		K00207-dihydropyrimidine dehydrogenase (NADP+)	IPR017900-4Fe-4S ferredoxin, iron-sulphur binding, conserved site IPR023753-Pyridine nucleotide-disulphide oxidoreductase, IPR012285-Fumarate reductase, C-terminal IPR005720-Dihydroorotate dehydrogenase, class 1 IPR013785-Aldolase-type TIM barrel IPR009051-Alpha-helical ferredoxin IPR016040-NAD(P)-binding domain IPR012135-Dihydroorotate dehydrogenase, class 1/ 2 IPR017896-4Fe-4S ferredoxin, iron-…	Biological Process: 'de novo' pyrimidine base biosynthetic process (GO:0006207), Biological Process: metabolic process (GO:0008152), Biological Process: oxidation-reduction process (GO:0055114), Biological Process: UMP biosynthetic process (GO:0006222), Cellular Component: cytoplasm (GO:0005737), Molecular Function: binding (GO:0005488), Molecular Function: catalytic activity (GO:0003824), Molecu…	cel:C25F6.3 dpyd-1; DihydroPYrimidine Dehydrogenase family member (dpyd-1); K00207 dihydropyrimidine dehydrogenase (NADP+) [EC:1.3.1.2]%1058%68.4310018903592%0.0	-	-	Y		0	0	0	2	0	0	0	0	0	0	0	0	0	0	0	0	0	0
	GS_21105	-	-	-	-	Y		K09493-T-complex protein 1 subunit alpha	IPR002194-Chaperonin TCP-1, conserved site IPR002423-Chaperonin Cpn60/TCP-1 IPR012715-T-complex protein 1, alpha subunit IPR017998-Chaperone, tailless complex polypeptide 1	Biological Process: cellular protein metabolic process (GO:0044267), Biological Process: protein folding (GO:0006457), Molecular Function: ATP binding (GO:0005524), Molecular Function: unfolded protein binding (GO:0051082)	bmy:Bm1_43680 T-complex protein 1, alpha subunit; K09493 T-complex protein 1 subunit alpha%540%86.8518518518518%0.0	-	-	Y		0	0	0	2	0	0	0	0	0	0	0	0	0	0	0	0	0	0
	GS_21321	-	-	-	-	Y		K02898-large subunit ribosomal protein L26e	IPR008991-Translation protein SH3-like IPR005825-Ribosomal protein L24/L26, conserved site IPR014723-Ribosomal protein L24, SH3-like IPR005824-KOW IPR005756-Ribosomal protein L26/L24P, eukaryotic/archaeal	Biological Process: translation (GO:0006412), Cellular Component: intracellular (GO:0005622), Cellular Component: large ribosomal subunit (GO:0015934), Cellular Component: ribosome (GO:0005840), Molecular Function: structural constituent of ribosome (GO:0003735)	bmy:Bm1_47020 60S ribosomal protein L26; K02898 large subunit ribosomal protein L26e%144%93.0555555555556%5e-74	-	-	-		0	0	0	2	0	0	0	0	0	0	0	0	0	0	0	0	0	0
	GS_21324	-	-	-	-	Y		K03960-NADH dehydrogenase (ubiquinone) 1 beta subcomplex 4	IPR009866-NADH:ubiquinone oxidoreductase, subunit NDUFB4	Cellular Component: mitochondrion (GO:0005739), Molecular Function: NADH dehydrogenase (ubiquinone) activity (GO:0008137)	sp|O95168|NDUB4_HUMAN%%NADH dehydrogenase [ubiquinone] 1 beta subcomplex subunit 4 OS=Homo sapiens GN=NDUFB4 PE=1 SV=3%%1.3e-40	Y	-	-		0	0	0	2	0	0	0	0	0	0	0	0	0	0	0	0	0	0
	GS_21555	-	-	-	-	Y		-	-	-	Channels and Transporters%gnl|TC-DB|O45283%9%Incompletely characterized transport systems%9.B.%Putative transport proteins%9.B.9% Urate Transporter (UAT) Family.%9.B.97.2.1% Acyltransferase-3/Putative Acetyl-CoA Transporter (ATAT) Family.; Urate Transporter (UAT) Family.%"Protein C31A11.7, partially confirmed by transcript evidence OS=Caenorhabditis elegans GN=oac-7 PE=2 SV=3"%222%36.48648649%5.0…	Y	-	-		0	0	0	2	0	0	0	0	0	0	0	0	0	0	0	0	0	0
	GS_22009	-	-	-	-	Y		-	IPR019781-WD40 repeat, subgroup IPR015943-WD40/YVTN repeat-like-containing domain IPR017986-WD40-repeat-containing domain IPR019782-WD40 repeat 2 IPR011046-WD40 repeat-like-containing domain IPR001680-WD40 repeat	Molecular Function: protein binding (GO:0005515)	bmy:Bm1_25760 WD domain containing protein%462%56.0606060606061%1e-151	Y	-	-		0	0	0	2	0	0	0	0	0	0	0	0	0	0	0	0	0	0
	GS_22451	-	-	-	-	Y		K00128-aldehyde dehydrogenase (NAD+)	IPR016161-Aldehyde/histidinol dehydrogenase IPR012394-Aldehyde dehydrogenase NAD(P)-dependent IPR016162-Aldehyde dehydrogenase, N-terminal IPR016163-Aldehyde dehydrogenase, C-terminal IPR015590-Aldehyde dehydrogenase domain	Biological Process: cellular aldehyde metabolic process (GO:0006081), Biological Process: metabolic process (GO:0008152), Biological Process: oxidation-reduction process (GO:0055114), Molecular Function: aldehyde dehydrogenase [NAD(P)+] activity (GO:0004030), Molecular Function: oxidoreductase activity (GO:0016491)	cel:T05H4.13 alh-4; ALdehyde deHydrogenase family member (alh-4); K00128 aldehyde dehydrogenase (NAD+) [EC:1.2.1.3]%486%58.641975308642%1e-174	Y	-	Y		0	0	0	2	0	0	0	0	0	0	0	0	0	0	0	0	0	0
	GS_22482	-	-	-	-	Y		K02127-F-type H+-transporting ATPase subunit b	IPR008688-ATPase, F0 complex, subunit B, mitochondrial IPR013837-ATPase, F0 complex subunit B, mitochondrial, metazoa	Biological Process: ATP synthesis coupled proton transport (GO:0015986), Cellular Component: mitochondrial proton-transporting ATP synthase complex, coupling factor F(o) (GO:0000276), Molecular Function: hydrogen ion transmembrane transporter activity (GO:0015078)	bmy:Bm1_24615 ATP synthase B chain, mitochondrial precursor; K02127 F-type H+-transporting ATPase subunit b [EC:3.6.3.14]%100%53%2e-25	-	-	-		0	0	0	2	0	0	0	0	0	0	0	0	0	0	0	0	0	0
	GS_22654	-	-	-	-	Y		-	IPR003124-Actin-binding WH2	Molecular Function: protein binding (GO:0005515)	Hypothetical protein	-	-	-		0	0	0	2	0	0	0	0	0	0	0	0	0	0	0	0	0	0
	GS_23051	-	-	-	-	Y		K00699-glucuronosyltransferase	IPR002213-UDP-glucuronosyl/UDP-glucosyltransferase	Biological Process: metabolic process (GO:0008152), Molecular Function: transferase activity, transferring hexosyl groups (GO:0016758)	cel:AC3.2 ugt-49; UDP-GlucuronosylTransferase family member (ugt-49)%235%40.8510638297872%1e-51	Y	-	-		0	0	0	2	0	0	0	0	0	0	0	0	0	0	0	0	0	0
	GS_23076	-	-	-	-	Y		K01187-alpha-glucosidase	IPR000519-P-type trefoil IPR000322-Glycoside hydrolase, family 31 IPR017853-Glycoside hydrolase, superfamily IPR011013-Glycoside hydrolase-type carbohydrate-binding	Biological Process: carbohydrate metabolic process (GO:0005975), Molecular Function: carbohydrate binding (GO:0030246), Molecular Function: catalytic activity (GO:0003824), Molecular Function: hydrolase activity, hydrolyzing O-glycosyl compounds (GO:0004553)	sp|A1CNK4|AGDC_ASPCL%%Probable alpha/beta-glucosidase agdC OS=Aspergillus clavatus GN=agdC PE=3 SV=1%%0	-	Y	-		0	0	0	2	0	0	0	0	0	0	0	0	0	0	0	0	0	0
	GS_23080	-	-	-	-	Y		K02977-small subunit ribosomal protein S27Ae	IPR002906-Ribosomal protein S27a	Biological Process: translation (GO:0006412), Cellular Component: intracellular (GO:0005622), Cellular Component: ribosome (GO:0005840), Molecular Function: structural constituent of ribosome (GO:0003735)	bmy:Bm1_09050 ubiquitin; K02977 small subunit ribosomal protein S27Ae%79%88.6075949367088%3e-29	-	-	-		0	0	0	2	0	0	0	0	0	0	0	0	0	0	0	0	0	0
	GS_23626	-	-	-	-	Y		K15414-complement component 1 Q subcomponent-binding protein, mitochondrial	IPR003428-Mitochondrial glycoprotein	Cellular Component: mitochondrial matrix (GO:0005759)	sp|Q21018|CRI3_CAEEL%%Conserved regulator of innate immunity protein 3 OS=Caenorhabditis elegans GN=cri-3 PE=1 SV=2%%1.3e-79	-	Y	-		0	0	0	2	0	0	0	0	0	0	0	0	0	0	0	0	0	0
	GS_23721	-	-	-	-	Y		K02993-small subunit ribosomal protein S7e	IPR000554-Ribosomal protein S7e	Biological Process: translation (GO:0006412), Cellular Component: intracellular (GO:0005622), Cellular Component: ribosome (GO:0005840), Molecular Function: structural constituent of ribosome (GO:0003735)	bmy:Bm1_09900 40S ribosomal protein S7; K02993 small subunit ribosomal protein S7e%197%82.2335025380711%9e-88	-	-	-		0	0	0	2	0	0	0	0	0	0	0	0	0	0	0	0	0	0
	GS_00076	-	-	-	-	Y		K07894-Ras-related protein Rab-6B	IPR020851-Small GTPase IPR001806-Ras GTPase IPR013753-Ras IPR002041-Ran GTPase IPR003579-Ras small GTPase, Rab type IPR003578-Small GTPase, Rho type IPR003577-Ras small GTPase, Ras type IPR005225-Small GTP-binding protein domain	Biological Process: GTP catabolic process (GO:0006184), Biological Process: intracellular protein transport (GO:0006886), Biological Process: nucleocytoplasmic transport (GO:0006913), Biological Process: protein transport (GO:0015031), Biological Process: signal transduction (GO:0007165), Biological Process: small GTPase mediated signal transduction (GO:0007264), Cellular Component: intracellular…	GTPase%rab_6.2 %205%89.2682926829268%1e-106	-	-	-		0	0	0	1	0	0	0	0	0	0	0	0	0	0	0	0	0	0
	GS_00195	-	-	-	-	Y		-	IPR003887-Lamino-associated polypeptide 2/emerin IPR018996-Inner nuclear membrane protein MAN1 IPR011015-LEM-like domain	Cellular Component: integral to nuclear inner membrane (GO:0005639), Cellular Component: nuclear envelope (GO:0005635)	bmy:Bm1_31790 LEM domain containing protein%405%45.4320987654321%9e-93	Y	-	-		0	0	0	1	0	0	0	0	0	0	0	0	0	0	0	0	0	0
	GS_00318	-	-	-	-	Y		K07151-dolichyl-diphosphooligosaccharide--protein glycosyltransferase	IPR003674-Oligosaccharyl transferase, STT3 subunit	Biological Process: protein glycosylation (GO:0006486), Cellular Component: membrane (GO:0016020), Molecular Function: oligosaccharyl transferase activity (GO:0004576)	bmy:Bm1_32435 ITM1 protein; K07151 dolichyl-diphosphooligosaccharide--protein glycosyltransferase [EC:2.4.1.119]%691%76.410998552822%0.0	Y	-	-		0	0	0	1	0	0	0	0	0	0	0	0	0	0	0	0	0	0
	GS_00330	-	-	-	-	Y		K05841-sterol 3beta-glucosyltransferase	IPR002213-UDP-glucuronosyl/UDP-glucosyltransferase	Biological Process: metabolic process (GO:0008152), Molecular Function: transferase activity, transferring hexosyl groups (GO:0016758)	bmy:Bm1_13480 UDP-glucoronosyl and UDP-glucosyl transferase family protein; K00699 glucuronosyltransferase [EC:2.4.1.17]%452%32.9646017699115%1e-57	Y	-	-		0	0	0	1	0	0	0	0	0	0	0	0	0	0	0	0	0	0
	GS_00686	-	-	-	-	Y		-	IPR019826-Carboxylesterase type B, active site IPR002018-Carboxylesterase, type B	-	sp|Q8BYM5|NLGN3_MOUSE%%Neuroligin-3 OS=Mus musculus GN=Nlgn3 PE=1 SV=1%%9.5e-238	Y	-	Y		0	0	0	1	0	0	0	0	0	0	0	0	0	0	0	0	0	0
	GS_01049	-	-	-	-	Y		K12200-programmed cell death 6-interacting protein	IPR004328-BRO1 domain	-	bmy:Bm1_48390 Programmed cell death 6 interacting protein; K12200 programmed cell death 6-interacting protein%911%70.1427003293085%0.0	-	-	-		0	0	0	1	0	0	0	0	0	0	0	0	0	0	0	0	0	0
	GS_01377	-	-	-	-	Y		K03083-glycogen synthase kinase 3 beta	IPR002290-Serine/threonine-protein kinase domain IPR020635-Tyrosine-protein kinase, catalytic domain IPR017442-Serine/threonine-protein kinase-like domain IPR000719-Protein kinase, catalytic domain IPR011009-Protein kinase-like domain IPR008271-Serine/threonine-protein kinase, active site IPR017441-Protein kinase, ATP binding site	Biological Process: protein phosphorylation (GO:0006468), Molecular Function: ATP binding (GO:0005524), Molecular Function: protein kinase activity (GO:0004672), Molecular Function: protein serine/threonine kinase activity (GO:0004674), Molecular Function: transferase activity, transferring phosphorus-containing groups (GO:0016772)	ks-sarfari_kinase%glycogen synthase kinase 3 beta%CMGC%GSK%GSK%9606%hGSK3b_231%289%83.3910034602076%1e-152	-	-	Y		0	0	0	1	0	0	0	0	0	0	0	0	0	0	0	0	0	0
	GS_01459	-	-	-	-	Y		K07936-GTP-binding nuclear protein Ran	IPR013753-Ras IPR002041-Ran GTPase IPR003579-Ras small GTPase, Rab type IPR003578-Small GTPase, Rho type IPR003577-Ras small GTPase, Ras type IPR005225-Small GTP-binding protein domain	Biological Process: GTP catabolic process (GO:0006184), Biological Process: intracellular protein transport (GO:0006886), Biological Process: nucleocytoplasmic transport (GO:0006913), Biological Process: protein transport (GO:0015031), Biological Process: signal transduction (GO:0007165), Biological Process: small GTPase mediated signal transduction (GO:0007264), Cellular Component: intracellular…	GTPase%ran_1 %205%87.8048780487805%1e-109	-	-	-		0	0	0	1	0	0	0	0	0	0	0	0	0	0	0	0	0	0
	GS_01590	-	-	-	-	Y		K06528-lysosomal-associated membrane protein 1/2	IPR002000-Lysosome-associated membrane glycoprotein	Cellular Component: membrane (GO:0016020)	bmy:Bm1_33020 LAMP family protein lmp-1 precursor; K06528 lysosomal-associated membrane protein 1/2%194%41.2371134020619%8e-34	Y	-	-		0	0	0	1	0	0	0	0	0	0	0	0	0	0	0	0	0	0
	GS_01644	-	-	-	-	Y		K04382-protein phosphatase 2 (formerly 2A), catalytic subunit	IPR004843-Metallo-dependent phosphatase IPR006186-Serine/threonine-specific protein phosphatase/bis(5-nucleosyl)-tetraphosphatase	Molecular Function: hydrolase activity (GO:0016787)	Phosphatase%STP%F38H4.9%locus:let- 92%303%87.1287128712871%1e-167	-	-	Y		0	0	0	1	0	0	0	0	0	0	0	0	0	0	0	0	0	0
	GS_01784	-	-	-	-	Y		K09496-T-complex protein 1 subunit delta	IPR002194-Chaperonin TCP-1, conserved site IPR002423-Chaperonin Cpn60/TCP-1 IPR012717-T-complex protein 1, delta subunit IPR017998-Chaperone, tailless complex polypeptide 1	Biological Process: cellular protein metabolic process (GO:0044267), Biological Process: protein folding (GO:0006457), Molecular Function: ATP binding (GO:0005524), Molecular Function: unfolded protein binding (GO:0051082)	bmy:Bm1_17890 T-complex protein 1, delta subunit; K09496 T-complex protein 1 subunit delta%519%85.1637764932563%0.0	-	-	Y		0	0	0	1	0	0	0	0	0	0	0	0	0	0	0	0	0	0
	GS_01817	-	-	-	-	Y		-	IPR001452-Src homology-3 domain IPR004148-BAR IPR003005-Amphiphysin	Cellular Component: cytoplasm (GO:0005737), Molecular Function: protein binding (GO:0005515)	bmy:Bm1_00810 Variant SH3 domain containing protein%550%51.4545454545455%1e-139	-	-	-		0	0	0	1	0	0	0	0	0	0	0	0	0	0	0	0	0	0
	GS_02153	-	-	-	-	Y		K07512-mitochondrial trans-2-enoyl-CoA reductase	IPR002085-Alcohol dehydrogenase superfamily, zinc-containing IPR013154-Alcohol dehydrogenase GroES-like IPR011032-GroES-like	Biological Process: oxidation-reduction process (GO:0055114), Molecular Function: oxidoreductase activity (GO:0016491), Molecular Function: zinc ion binding (GO:0008270)	bmy:Bm1_31850 oxidoreductase, zinc-binding dehydrogenase family protein; K07512 mitochondrial trans-2-enoyl-CoA reductase [EC:1.3.1.38]%184%61.9565217391304%1e-59	-	-	-		0	0	0	1	0	0	0	0	0	0	0	0	0	0	0	0	0	0
	GS_02191	-	-	-	-	Y		K02358-elongation factor Tu	IPR009001-Translation elongation factor EF1A/initiation factor IF2gamma, C-terminal IPR009000-Translation elongation/initiation factor/Ribosomal, beta-barrel IPR004160-Translation elongation factor EFTu/EF1A, C-terminal IPR004541-Translation elongation factor EFTu/EF1A, bacterial/organelle IPR000795-Protein synthesis factor, GTP-binding IPR004161-Translation elongation factor EFTu/EF1A, domain 2	Biological Process: translational elongation (GO:0006414), Cellular Component: intracellular (GO:0005622), Molecular Function: GTP binding (GO:0005525), Molecular Function: GTPase activity (GO:0003924), Molecular Function: translation elongation factor activity (GO:0003746)	GTPase%Y39G10AR.8 %176%31.25%8e-14	-	-	-		0	0	0	1	0	0	0	0	0	0	0	0	0	0	0	0	0	0
	GS_02796	-	-	-	-	Y		-	IPR001212-Somatomedin B domain IPR000169-Peptidase, cysteine peptidase active site IPR013128-Peptidase C1A, papain IPR000668-Peptidase C1A, papain C-terminal	Biological Process: immune response (GO:0006955), Biological Process: proteolysis (GO:0006508), Molecular Function: cysteine-type endopeptidase activity (GO:0004197), Molecular Function: cysteine-type peptidase activity (GO:0008234), Molecular Function: polysaccharide binding (GO:0030247), Molecular Function: scavenger receptor activity (GO:0005044)	sp|P90850|YCF2E_CAEEL%%Uncharacterized peptidase C1-like protein F26E4.3 OS=Caenorhabditis elegans GN=F26E4.3 PE=1 SV=3%%4e-162	-	Y	-		0	0	0	1	0	0	0	0	0	0	0	0	0	0	0	0	0	0
	GS_03272	-	-	-	-	Y		K00102-D-lactate dehydrogenase (cytochrome)	IPR016166-FAD-binding, type 2 IPR016164-FAD-linked oxidase-like, C-terminal IPR004113-FAD-linked oxidase, C-terminal IPR016168-FAD-linked oxidase, FAD-binding, subdomain 2 IPR016167-FAD-binding, type 2, subdomain 1 IPR016171-Vanillyl-alcohol oxidase, C-terminal subdomain 2 IPR006094-FAD linked oxidase, N-terminal	Molecular Function: catalytic activity (GO:0003824), Molecular Function: flavin adenine dinucleotide binding (GO:0050660), Molecular Function: oxidoreductase activity (GO:0016491)	bmy:Bm1_34710 FAD linked oxidases, C-terminal domain containing protein; K00102 D-lactate dehydrogenase (cytochrome) [EC:1.1.2.4]%475%56.8421052631579%1e-158	-	-	Y		0	0	0	1	0	0	0	0	0	0	0	0	0	0	0	0	0	0
	GS_03771	-	-	-	-	Y		-	-	-	Hypothetical protein	-	-	-		0	0	0	1	0	0	0	0	0	0	0	0	0	0	0	0	0	0
	GS_03820	-	-	-	-	Y		-	IPR009069-MTCP1	-	sp|Q9CRB9|CHCH3_MOUSE%%Coiled-coil-helix-coiled-coil-helix domain-containing protein 3, mitochondrial OS=Mus musculus GN=Chchd3 PE=1 SV=1%%8.5e-48	-	-	-		0	0	0	1	0	0	0	0	0	0	0	0	0	0	0	0	0	0
	GS_04218	-	-	-	-	Y		-	IPR000048-IQ motif, EF-hand binding site IPR001609-Myosin head, motor domain	Cellular Component: myosin complex (GO:0016459), Molecular Function: ATP binding (GO:0005524), Molecular Function: motor activity (GO:0003774), Molecular Function: protein binding (GO:0005515)	cel:F47G6.4 spe-15; defective SPErmatogenesis family member (spe-15); K10358 myosin VI%535%45.0467289719626%1e-116	-	-	-		0	0	0	1	0	0	0	0	0	0	0	0	0	0	0	0	0	0
	GS_04646	-	-	-	-	Y		K10429-microtubule-associated protein 1	-	-	sp|Q66K74|MAP1S_HUMAN%%Microtubule-associated protein 1S OS=Homo sapiens GN=MAP1S PE=1 SV=2%%8.6e-155	-	Y	-		0	0	0	1	0	0	0	0	0	0	0	0	0	0	0	0	0	0
	GS_04976	-	-	-	-	Y		K03963-NADH dehydrogenase (ubiquinone) 1 beta subcomplex 7	IPR008698-NADH:ubiquinone oxidoreductase, B18 subunit	Cellular Component: mitochondrion (GO:0005739), Molecular Function: NADH dehydrogenase (ubiquinone) activity (GO:0008137), Molecular Function: NADH dehydrogenase activity (GO:0003954)	Channels and Transporters%gnl|TC-DB|Q02368%3%Primary active transporters%3.D.%Oxidoreduction-driven transporters%3.D.1%Oxidoreduction-driven transporters%3.D.1.6.1% H+ or Na+-translocating NADH Dehydrogenase (NDH) Family.%NADH dehydrogenase [ubiquinone] 1 beta subcomplex subunit 7 - Bos taurus (Bovine).%66%53.03030303%3.00E-12	-	-	-		0	0	0	1	0	0	0	0	0	0	0	0	0	0	0	0	0	0
	GS_05583	-	-	-	-	Y		K10396-kinesin family member 5	IPR019821-Kinesin, motor region, conserved site IPR001752-Kinesin, motor domain	Biological Process: microtubule-based movement (GO:0007018), Molecular Function: ATP binding (GO:0005524), Molecular Function: microtubule motor activity (GO:0003777)	bmy:Bm1_44440 Kinesin motor domain containing protein; K10396 kinesin family member 5%1051%80.9705042816365%0.0	-	-	-		0	0	0	1	0	0	0	0	0	0	0	0	0	0	0	0	0	0
	GS_06021	-	-	-	-	Y		K01835-phosphoglucomutase	IPR016066-Alpha-D-phosphohexomutase, conserved site IPR016055-Alpha-D-phosphohexomutase, alpha/beta/alpha I/II/III IPR005843-Alpha-D-phosphohexomutase, C-terminal IPR005841-Alpha-D-phosphohexomutase superfamily IPR005846-Alpha-D-phosphohexomutase, alpha/beta/alpha domain III IPR005845-Alpha-D-phosphohexomutase, alpha/beta/alpha domain II IPR005844-Alpha-D-phosphohexomutase, alpha/beta/alpha domai…	Biological Process: carbohydrate metabolic process (GO:0005975), Molecular Function: intramolecular transferase activity, phosphotransferases (GO:0016868), Molecular Function: magnesium ion binding (GO:0000287)	bmy:Bm1_15740 phosphoglucomutase; K01835 phosphoglucomutase [EC:5.4.2.2]%594%76.5993265993266%0.0	-	-	Y		0	0	0	1	0	0	0	0	0	0	0	0	0	0	0	0	0	0
	GS_06075	-	-	-	-	Y		K02140-F-type H+-transporting ATPase subunit g	IPR006808-ATPase, F0 complex, subunit G, mitochondrial	Biological Process: ATP synthesis coupled proton transport (GO:0015986), Cellular Component: mitochondrial proton-transporting ATP synthase complex, coupling factor F(o) (GO:0000276), Molecular Function: hydrogen ion transmembrane transporter activity (GO:0015078)	cel:C53B7.4 asg-2; ATP Synthase G homolog family member (asg-2); K02140 F-type H+-transporting ATPase subunit g [EC:3.6.3.14]%125%55.2%9e-36	-	-	-		0	0	0	1	0	0	0	0	0	0	0	0	0	0	0	0	0	0
	GS_06337	-	-	-	-	Y		-	-	-	cel:T21C9.5 lpd-9; LiPid Depleted family member (lpd-9)%91%48.3516483516484%3e-19	Y	-	-		0	0	0	1	0	0	0	0	0	0	0	0	0	0	0	0	0	0
	GS_06490	-	-	-	-	Y		K03066-26S proteasome regulatory subunit T6	IPR003593-ATPase, AAA+ type, core IPR005937-26S proteasome subunit P45 IPR003960-ATPase, AAA-type, conserved site IPR003959-ATPase, AAA-type, core	Biological Process: protein catabolic process (GO:0030163), Cellular Component: cytoplasm (GO:0005737), Molecular Function: ATP binding (GO:0005524), Molecular Function: hydrolase activity (GO:0016787), Molecular Function: nucleoside-triphosphatase activity (GO:0017111), Molecular Function: nucleotide binding (GO:0000166)	Channels and Transporters%gnl|TC-DB|P25694%3%Primary active transporters%3.A.%P-P-bond-hydrolysis-driven transporters%3.A.1% ATP-binding Cassette (ABC) Superfamily.%3.A.16.1.2% ATP-binding Cassette (ABC) Superfamily.; Endoplasmic Reticular Retrotranslocon (ER-RT) Family.%Cell division control protein 48 - Saccharomyces cerevisiae (Baker's yeast).%275%39.63636364%2.00E-55	-	-	Y		0	0	0	1	0	0	0	0	0	0	0	0	0	0	0	0	0	0
	GS_07117	-	-	-	-	Y		K01899-succinyl-CoA synthetase alpha subunit	IPR016102-Succinyl-CoA synthetase-like IPR003781-CoA-binding IPR005811-ATP-citrate lyase/succinyl-CoA ligase IPR005810-Succinyl-CoA ligase, alpha subunit IPR016040-NAD(P)-binding domain IPR017440-ATP-citrate lyase/succinyl-CoA ligase, active site	Biological Process: metabolic process (GO:0008152), Molecular Function: ATP citrate synthase activity (GO:0003878), Molecular Function: binding (GO:0005488), Molecular Function: catalytic activity (GO:0003824), Molecular Function: succinate-CoA ligase (ADP-forming) activity (GO:0004775)	bmy:Bm1_00350 succinyl-CoA ligase [GDP-forming] alpha-chain, mitochindrial; K01899 succinyl-CoA synthetase alpha subunit [EC:6.2.1.4 6.2.1.5]%304%82.5657894736842%1e-141	-	-	-		0	0	0	1	0	0	0	0	0	0	0	0	0	0	0	0	0	0
	GS_08416	-	-	-	-	Y		-	IPR006622-Iron sulphur-containing domain, CDGSH-type, subfamily IPR018967-Iron sulphur-containing domain, CDGSH-type	Cellular Component: intracellular membrane-bounded organelle (GO:0043231), Molecular Function: 2 iron, 2 sulfur cluster binding (GO:0051537)	bmy:Bm1_01440 Uncharacterized hematopoietic stem/progenitor cells protein MDS029%94%62.7659574468085%2e-31	Y	-	-		0	0	0	1	0	0	0	0	0	0	0	0	0	0	0	0	0	0
	GS_08530	-	-	-	-	Y		-	IPR020846-Major facilitator superfamily domain IPR005828-General substrate transporter IPR016196-Major facilitator superfamily domain, general substrate transporter	Biological Process: transmembrane transport (GO:0055085), Cellular Component: integral to membrane (GO:0016021), Molecular Function: transmembrane transporter activity (GO:0022857)	Channels and Transporters%gnl|TC-DB|O35956%2%Electorchemical potential-driven transporters%2.A.%"Porters (uniporters, symporters, antiporters)"%2.A.1% Major Facilitator Superfamily (MFS).%2.A.1.19.4% Major Facilitator Superfamily (MFS).%RENAL ORGANIC ANION TRANSPORT PROTEIN 1 - Rattus norvegicus (Rat).%443%26.18510158%2.00E-31	Y	-	Y		0	0	0	1	0	0	0	0	0	0	0	0	0	0	0	0	0	0
	GS_08639	-	-	-	-	Y		K13524-4-aminobutyrate aminotransferase / (S)-3-amino-2-methylpropionate transaminase	IPR015421-Pyridoxal phosphate-dependent transferase, major region, subdomain 1 IPR015422-Pyridoxal phosphate-dependent transferase, major region, subdomain 2 IPR015424-Pyridoxal phosphate-dependent transferase, major domain IPR005814-Aminotransferase class-III IPR004631-4-aminobutyrate aminotransferase, eukaryotic	Biological Process: gamma-aminobutyric acid metabolic process (GO:0009448), Molecular Function: 4-aminobutyrate transaminase activity (GO:0003867), Molecular Function: catalytic activity (GO:0003824), Molecular Function: pyridoxal phosphate binding (GO:0030170), Molecular Function: transaminase activity (GO:0008483)	cel:K04D7.3 gta-1; GABA TransAminase family member (gta-1); K13524 4-aminobutyrate aminotransferase / (S)-3-amino-2-methylpropionate transaminase [EC:2.6.1.19 2.6.1.22]%470%65.7446808510638%0.0	-	-	Y		0	0	0	1	0	0	0	0	0	0	0	0	0	0	0	0	0	0
	GS_08733	-	-	-	-	Y		K10580-ubiquitin-conjugating enzyme E2 N	IPR016135-Ubiquitin-conjugating enzyme/RWD-like IPR000608-Ubiquitin-conjugating enzyme, E2 IPR023313-Ubiquitin-conjugating enzyme, active site	Molecular Function: acid-amino acid ligase activity (GO:0016881)	Channels and Transporters%gnl|TC-DB|P29340%3%Primary active transporters%3.A.%P-P-bond-hydrolysis-driven transporters%3.A.2%" H+- or Na+-translocating F-type, V-type and A-type ATPase (F-ATPase) Superfamily."%3.A.20.1.1%" H+- or Na+-translocating F-type, V-type and A-type ATPase (F-ATPase) Superfamily.; Peroxisomal Protein Importer (PPI) Family."%Ubiquitin-conjugating enzyme E2-21 kDa OS=Saccharo…	-	-	-		0	0	0	1	0	0	0	0	0	0	0	0	0	0	0	0	0	0
	GS_09102	-	-	-	-	Y		K02883-large subunit ribosomal protein L18e	IPR021131-Ribosomal protein L18e/L15P IPR000039-Ribosomal protein L18e	Biological Process: translation (GO:0006412), Cellular Component: intracellular (GO:0005622), Cellular Component: ribosome (GO:0005840), Molecular Function: structural constituent of ribosome (GO:0003735)	bmy:Bm1_29215 60S ribosomal protein L18; K02883 large subunit ribosomal protein L18e%79%88.6075949367088%7e-33	-	-	-		0	0	0	1	0	0	0	0	0	0	0	0	0	0	0	0	0	0
	GS_09498	-	-	-	-	Y		-	IPR001830-Glycosyl transferase, family 20	Biological Process: trehalose biosynthetic process (GO:0005992), Molecular Function: catalytic activity (GO:0003824)	cel:F19H8.1 tps-2; Trehalose 6-Phosphate Synthase family member (tps-2)%614%59.6091205211726%0.0	-	-	-		0	0	0	1	0	0	0	0	0	0	0	0	0	0	0	0	0	0
	GS_09522	-	-	-	-	Y		K08870-PTK9 protein tyrosine kinase 9	IPR002108-Actin-binding, cofilin/tropomyosin type	Cellular Component: intracellular (GO:0005622), Molecular Function: actin binding (GO:0003779)	sp|Q91YR1|TWF1_MOUSE%%Twinfilin-1 OS=Mus musculus GN=Twf1 PE=1 SV=2%%9.3e-148	-	-	-		0	0	0	1	0	0	0	0	0	0	0	0	0	0	0	0	0	0
	GS_09893	-	-	-	-	Y		K12196-vacuolar protein-sorting-associated protein 4	IPR015415-Vps4 oligomerisation, C-terminal IPR007330-MIT IPR003593-ATPase, AAA+ type, core IPR003960-ATPase, AAA-type, conserved site IPR003959-ATPase, AAA-type, core	Molecular Function: ATP binding (GO:0005524), Molecular Function: nucleoside-triphosphatase activity (GO:0017111), Molecular Function: nucleotide binding (GO:0000166)	Channels and Transporters%gnl|TC-DB|P25694%3%Primary active transporters%3.A.%P-P-bond-hydrolysis-driven transporters%3.A.1% ATP-binding Cassette (ABC) Superfamily.%3.A.16.1.2% ATP-binding Cassette (ABC) Superfamily.; Endoplasmic Reticular Retrotranslocon (ER-RT) Family.%Cell division control protein 48 - Saccharomyces cerevisiae (Baker's yeast).%188%41.4893617%2.00E-37	Y	-	-		0	0	0	1	0	0	0	0	0	0	0	0	0	0	0	0	0	0
	GS_09951	-	-	-	-	Y		K12898-heterogeneous nuclear ribonucleoprotein F/H	IPR000504-RNA recognition motif domain IPR012677-Nucleotide-binding, alpha-beta plait	Molecular Function: nucleic acid binding (GO:0003676), Molecular Function: nucleotide binding (GO:0000166)	bmy:Bm1_32715 RNA recognition motif.%343%74.9271137026239%1e-136	-	-	-		0	0	0	1	0	0	0	0	0	0	0	0	0	0	0	0	0	0
	GS_10376	-	-	-	-	Y		K13210-far upstream element-binding protein	IPR004087-K Homology IPR015096-Domain of unknown function DUF1897 IPR004088-K Homology, type 1 IPR018111-K Homology, type 1, subgroup	Molecular Function: RNA binding (GO:0003723)	bmy:Bm1_04840 KH domain containing protein; K13210 far upstream element-binding protein%577%80.4159445407279%0.0	-	-	-		0	0	0	1	0	0	0	0	0	0	0	0	0	0	0	0	0	0
	GS_11292	-	-	-	-	Y		-	IPR001322-Intermediate filament, C-terminal IPR018039-Intermediate filament protein, conserved site IPR016044-Filament IPR001664-Intermediate filament protein	Molecular Function: structural molecule activity (GO:0005198)	bmy:Bm1_45215 intermediate filament protein%578%90.8304498269896%0.0	-	-	-		0	0	0	1	0	0	0	0	0	0	0	0	0	0	0	0	0	0
	GS_11399	-	-	-	-	Y		K07972-guanine nucleotide-binding protein subunit beta, other	IPR015943-WD40/YVTN repeat-like-containing domain IPR019781-WD40 repeat, subgroup IPR020472-G-protein beta WD-40 repeat IPR017986-WD40-repeat-containing domain IPR001632-G-protein, beta subunit IPR019775-WD40 repeat, conserved site IPR019782-WD40 repeat 2 IPR011046-WD40 repeat-like-containing domain IPR001680-WD40 repeat	Molecular Function: protein binding (GO:0005515)	Channels and Transporters%gnl|TC-DB|O00628%3%Primary active transporters%3.A.%P-P-bond-hydrolysis-driven transporters%3.A.2%" H+- or Na+-translocating F-type, V-type and A-type ATPase (F-ATPase) Superfamily."%3.A.20.1.1%" H+- or Na+-translocating F-type, V-type and A-type ATPase (F-ATPase) Superfamily.; Peroxisomal Protein Importer (PPI) Family."%Peroxisomal targeting signal 2 receptor OS=Homo sa…	-	-	Y		0	0	0	1	0	0	0	0	0	0	0	0	0	0	0	0	0	0
	GS_11430	-	-	-	-	Y		K03094-S-phase kinase-associated protein 1	IPR016072-SKP1 component, dimerisation IPR011333-BTB/POZ fold IPR016073-SKP1 component, POZ IPR001232-SKP1 component	Biological Process: ubiquitin-dependent protein catabolic process (GO:0006511)	bmy:Bm1_00275 S-phase kinase-associated protein SKR-1; K03094 S-phase kinase-associated protein 1%167%80.8383233532934%7e-74	-	-	-		0	0	0	1	0	0	0	0	0	0	0	0	0	0	0	0	0	0
	GS_11444	-	-	-	-	Y		-	IPR003886-Nidogen, extracellular domain IPR005533-AMOP IPR000436-Sushi/SCR/CCP	Biological Process: cell-matrix adhesion (GO:0007160)	bmy:Bm1_10500 AMOP domain containing protein%1313%76.3899466869764%0.0	-	-	Y		0	0	0	1	0	0	0	0	0	0	0	0	0	0	0	0	0	0
	GS_11602	-	-	-	-	Y		-	IPR019819-Carboxylesterase type B, conserved site IPR019826-Carboxylesterase type B, active site IPR002018-Carboxylesterase, type B	-	sp|Q62889|NLGN3_RAT%%Neuroligin-3 OS=Rattus norvegicus GN=Nlgn3 PE=1 SV=1%%2e-219	-	Y	-		0	0	0	1	0	0	0	0	0	0	0	0	0	0	0	0	0	0
	GS_11717	-	-	-	-	Y		K02955-small subunit ribosomal protein S14e	IPR001971-Ribosomal protein S11 IPR018102-Ribosomal S11, conserved site	Biological Process: translation (GO:0006412), Cellular Component: intracellular (GO:0005622), Cellular Component: ribosome (GO:0005840), Molecular Function: structural constituent of ribosome (GO:0003735)	bmy:Bm1_16715 40S ribosomal protein S14; K02955 small subunit ribosomal protein S14e%140%95%3e-72	-	-	-		0	0	0	1	0	0	0	0	0	0	0	0	0	0	0	0	0	0
	GS_11799	-	-	-	-	Y		K02947-small subunit ribosomal protein S10e	IPR005326-Plectin/S10, N-terminal	-	bmy:Bm1_17195 40S ribosomal protein S10; K02947 small subunit ribosomal protein S10e%138%83.3333333333333%4e-63	-	-	-		0	0	0	1	0	0	0	0	0	0	0	0	0	0	0	0	0	0
	GS_12037	-	-	-	-	Y		-	IPR001753-Crotonase, core IPR016040-NAD(P)-binding domain IPR013328-Dehydrogenase, multihelical IPR006176-3-hydroxyacyl-CoA dehydrogenase, NAD binding	Biological Process: fatty acid metabolic process (GO:0006631), Biological Process: metabolic process (GO:0008152), Molecular Function: binding (GO:0005488), Molecular Function: catalytic activity (GO:0003824), Molecular Function: coenzyme binding (GO:0050662), Molecular Function: oxidoreductase activity (GO:0016491)	bmy:Bm1_51120 hydroxyacyl-Coenzyme A dehydrogenase/3-ketoacyl-Coenzyme A thiolase/enoyl-Coenzyme A hydratase, putative; K07515 enoyl-CoA hydratase / long-chain 3-hydroxyacyl-CoA dehydrogenase [EC:4.2.1.17 1.1.1.211]%560%38.2142857142857%1e-107	-	-	Y		0	0	0	1	0	0	0	0	0	0	0	0	0	0	0	0	0	0
	GS_12105	-	-	-	-	Y		-	IPR001683-Phox homologous domain IPR015404-Vps5 C-terminal	Biological Process: cell communication (GO:0007154), Molecular Function: phosphatidylinositol binding (GO:0035091), Molecular Function: protein binding (GO:0005515)	sp|Q5R613|SNX6_PONAB%%Sorting nexin-6 OS=Pongo abelii GN=SNX6 PE=2 SV=1%%9.2e-113	Y	-	-		0	0	0	1	0	0	0	0	0	0	0	0	0	0	0	0	0	0
	GS_12323	-	-	-	-	Y		K03232-elongation factor 1-beta	IPR014038-Translation elongation factor EF1B, beta/delta subunit, guanine nucleotide exchange IPR001326-Translation elongation factor EF1B, beta/delta chains, conserved site IPR014717-Translation elongation factor EF1B/ribosomal protein S6 IPR018940-Elongation factor 1 beta central acidic region, eukaryote	Biological Process: translational elongation (GO:0006414), Cellular Component: eukaryotic translation elongation factor 1 complex (GO:0005853), Molecular Function: translation elongation factor activity (GO:0003746)	bmy:Bm1_28320 elongation factor 1-beta/1-delta; K03232 elongation factor EF-1 beta subunit%213%68.075117370892%4e-70	-	-	-		0	0	0	1	0	0	0	0	0	0	0	0	0	0	0	0	0	0
	GS_12596	-	-	-	-	Y		-	IPR018108-Mitochondrial substrate/solute carrier IPR023395-Mitochondrial carrier domain	-	Channels and Transporters%gnl|TC-DB|Q9Y6C9%2%Electorchemical potential-driven transporters%2.A.%"Porters (uniporters, symporters, antiporters)"%2.A.2%Cation Symporter Family%2.A.29.25.2% Glycoside-Pentoside-Hexuronide (GPH):Cation Symporter Family.; Mitochondrial Carrier (MC) Family .%Mitochondrial carrier homolog 2 - Homo sapiens (Human).%259%29.34362934%1.00E-26	-	-	-		0	0	0	1	0	0	0	0	0	0	0	0	0	0	0	0	0	0
	GS_12879	-	-	-	-	Y		K12471-epsin	IPR003903-Ubiquitin interacting motif IPR008942-ENTH/VHS IPR001026-Epsin domain, N-terminal IPR013809-Epsin-like, N-terminal	-	bmy:Bm1_38210 Epsin 2; K12471 epsin%459%72.9847494553377%0.0	-	-	-		0	0	0	1	0	0	0	0	0	0	0	0	0	0	0	0	0	0
	GS_13243	-	-	-	-	Y		K03231-elongation factor 1-alpha	IPR009001-Translation elongation factor EF1A/initiation factor IF2gamma, C-terminal IPR009000-Translation elongation/initiation factor/Ribosomal, beta-barrel IPR004160-Translation elongation factor EFTu/EF1A, C-terminal IPR004539-Translation elongation factor EF1A, eukaryotic/archaeal IPR000795-Protein synthesis factor, GTP-binding IPR004161-Translation elongation factor EFTu/EF1A, domain 2	Biological Process: translational elongation (GO:0006414), Cellular Component: cytoplasm (GO:0005737), Molecular Function: GTP binding (GO:0005525), Molecular Function: GTPase activity (GO:0003924), Molecular Function: translation elongation factor activity (GO:0003746)	GTPase%F46B6.6 %270%25.9259259259259%2e-07	-	-	Y		0	0	0	1	0	0	0	0	0	0	0	0	0	0	0	0	0	0
	GS_13273	-	-	-	-	Y		K08512-vesicle-associated membrane protein 8	IPR001388-Synaptobrevin	Biological Process: vesicle-mediated transport (GO:0016192), Cellular Component: integral to membrane (GO:0016021)	Channels and Transporters%gnl|TC-DB|Q9BV40%1%Channel/pores%1.F.%Vescile fusion pores%1.F.1%Vescile fusion pores%1.F.1.1.1% Synaptosomal Vesicle Fusion Pore (SVF-Pore) Family.%Vesicle-associated membrane protein 8 - Homo sapiens (Human).%99%31.31313131%7.00E-07	Y	-	-		0	0	0	1	0	0	0	0	0	0	0	0	0	0	0	0	0	0
	GS_13458	-	-	-	-	Y		K02130-F-type H+-transporting ATPase subunit f	IPR019344-Mitochondrial F1-F0 ATP synthase subunit F, predicted	-	sp|Q22021|ATPK_CAEEL%%Putative ATP synthase subunit f, mitochondrial OS=Caenorhabditis elegans GN=R53.4 PE=2 SV=1%%6.2e-90	-	-	-		0	0	0	1	0	0	0	0	0	0	0	0	0	0	0	0	0	0
	GS_13761	-	-	-	-	Y		K03781-catalase	IPR002226-Catalase IPR011614-Catalase, N-terminal IPR020835-Catalase-like domain, haem-dependent IPR018028-Catalase-related subgroup	Biological Process: oxidation-reduction process (GO:0055114), Biological Process: response to oxidative stress (GO:0006979), Molecular Function: catalase activity (GO:0004096)	sp|P90682|CATA_ASCSU%%Catalase OS=Ascaris suum GN=CAT PE=2 SV=2%%5.3e-215	-	-	Y		0	0	0	1	0	0	0	0	0	0	0	0	0	0	0	0	0	0
	GS_13836	-	-	-	-	Y		K00236-succinate dehydrogenase (ubiquinone) cytochrome b560 subunit	IPR000701-Succinate dehydrogenase/Fumarate reductase, transmembrane subunit IPR014314-Succinate dehydrogenase, cytochrome b556 subunit IPR018495-Succinate dehydrogenase, cytochrome b subunit, conserved site	Biological Process: tricarboxylic acid cycle (GO:0006099), Cellular Component: membrane (GO:0016020), Cellular Component: plasma membrane succinate dehydrogenase complex (GO:0045282), Molecular Function: electron carrier activity (GO:0009055), Molecular Function: oxidoreductase activity, acting on the CH-CH group of donors (GO:0016627), Molecular Function: succinate dehydrogenase activity (GO:000…	bmy:Bm1_30090 Succinate dehydrogenase cytochrome b560 subunit, mitochondrialprecursor; K00236 succinate dehydrogenase (ubiquinone) cytochrome b subunit [EC:1.3.5.1]%171%67.8362573099415%2e-56	Y	-	-		0	0	0	1	0	0	0	0	0	0	0	0	0	0	0	0	0	0
	GS_14058	-	-	-	-	Y		K15437-aminoacyl tRNA synthase complex-interacting multifunctional protein 1	IPR016027-Nucleic acid-binding, OB-fold-like IPR002547-tRNA-binding domain IPR012340-Nucleic acid-binding, OB-fold	Molecular Function: tRNA binding (GO:0000049)	bmy:Bm1_12165 methionyl-tRNA synthetase; K01874 methionyl-tRNA synthetase [EC:6.1.1.10]%314%49.3630573248408%3e-78	-	-	-		0	0	0	1	0	0	0	0	0	0	0	0	0	0	0	0	0	0
	GS_14382	-	-	-	-	Y		K14006-protein transport protein SEC23	IPR007123-Gelsolin domain IPR006896-Sec23/Sec24, trunk domain IPR006900-Sec23/Sec24, helical domain IPR006895-Zinc finger, Sec23/Sec24-type IPR012990-Sec23/Sec24 beta-sandwich	Biological Process: ER to Golgi vesicle-mediated transport (GO:0006888), Biological Process: intracellular protein transport (GO:0006886), Cellular Component: COPII vesicle coat (GO:0030127), Molecular Function: zinc ion binding (GO:0008270)	bmy:Bm1_52435 putative Sec23 protein; K14006 protein transport protein SEC23%821%81.973203410475%0.0	-	-	Y		0	0	0	1	0	0	0	0	0	0	0	0	0	0	0	0	0	0
	GS_14433	-	-	-	-	Y		K00432-glutathione peroxidase	IPR012335-Thioredoxin fold IPR000889-Glutathione peroxidase IPR012336-Thioredoxin-like fold	Biological Process: oxidation-reduction process (GO:0055114), Biological Process: response to oxidative stress (GO:0006979), Molecular Function: glutathione peroxidase activity (GO:0004602)	bmy:Bm1_30395 Probable phospholipid hydroperoxide glutathione peroxidase; K00432 glutathione peroxidase [EC:1.11.1.9]%162%70.9876543209877%5e-64	-	-	-		0	0	0	1	0	0	0	0	0	0	0	0	0	0	0	0	0	0
	GS_14532	-	-	-	-	Y		K00078-dihydrodiol dehydrogenase / D-xylose 1-dehydrogenase (NADP)	IPR000683-Oxidoreductase, N-terminal IPR016040-NAD(P)-binding domain	Molecular Function: binding (GO:0005488), Molecular Function: oxidoreductase activity (GO:0016491)	xtr:448579 dhdh, MGC89088; trans-1,2-dihydrobenzene-1,2-diol dehydrogenase (EC:1.3.1.20 1.1.1.179); K00078 dihydrodiol dehydrogenase / D-xylose 1-dehydrogenase (NADP) [EC:1.3.1.20 1.1.1.179]%336%36.9047619047619%1e-52	-	-	Y		0	0	0	1	0	0	0	0	0	0	0	0	0	0	0	0	0	0
	GS_14701	-	-	-	-	Y		K15788-glycerate kinase	IPR007835-MOFRL domain	-	bmy:Bm1_28870 MOFRL family protein; K00865 glycerate kinase [EC:2.7.1.31]%380%52.3684210526316%1e-100	-	-	Y		0	0	0	1	0	0	0	0	0	0	0	0	0	0	0	0	0	0
	GS_14801	-	-	-	-	Y		K12185-ESCRT-I complex subunit VPS37	IPR009851-Modifier of rudimentary, Modr	-	sp|Q9H9H4|VP37B_HUMAN%%Vacuolar protein sorting-associated protein 37B OS=Homo sapiens GN=VPS37B PE=1 SV=1%%2.1e-70	-	-	-		0	0	0	1	0	0	0	0	0	0	0	0	0	0	0	0	0	0
	GS_15208	-	-	-	-	Y		K04630-guanine nucleotide-binding protein G(i) subunit alpha	IPR011025-G protein alpha subunit, helical insertion IPR001019-Guanine nucleotide binding protein (G-protein), alpha subunit IPR001408-G-protein alpha subunit, group I	Biological Process: G-protein coupled receptor protein signaling pathway (GO:0007186), Biological Process: signal transduction (GO:0007165), Molecular Function: GTP binding (GO:0005525), Molecular Function: guanyl nucleotide binding (GO:0019001), Molecular Function: signal transducer activity (GO:0004871)	GTPase%gpa_16 %357%69.4677871148459%1e-149	-	-	Y		0	0	0	1	0	0	0	0	0	0	0	0	0	0	0	0	0	0
	GS_16050	-	-	-	-	Y		K01528-dynamin GTPase	IPR001849-Pleckstrin homology domain IPR022812-Dynamin IPR020850-GTPase effector domain, GED IPR019762-Dynamin, GTPase region, conserved site IPR001401-Dynamin, GTPase domain IPR011993-Pleckstrin homology-type IPR000375-Dynamin central domain IPR003130-Dynamin GTPase effector	Molecular Function: GTP binding (GO:0005525), Molecular Function: GTPase activity (GO:0003924), Molecular Function: protein binding (GO:0005515)	GTPase%dyn_1 %758%84.1688654353562%0.0	-	-	-		0	0	0	1	0	0	0	0	0	0	0	0	0	0	0	0	0	0
	GS_16160	-	-	-	-	Y		K07611-lamin B	IPR001322-Intermediate filament, C-terminal IPR016044-Filament IPR001664-Intermediate filament protein	Molecular Function: structural molecule activity (GO:0005198)	bmy:Bm1_49730 Intermediate filament tail domain containing protein%617%73.257698541329%0.0	-	-	-		0	0	0	1	0	0	0	0	0	0	0	0	0	0	0	0	0	0
	GS_16295	-	-	-	-	Y		K03263-translation initiation factor 5A	IPR019769-Translation elongation factor, IF5A, hypusine site IPR020189-Translation elongation factor, IF5A C-terminal IPR016027-Nucleic acid-binding, OB-fold-like IPR001884-Translation elongation factor IF5A IPR008991-Translation protein SH3-like IPR012340-Nucleic acid-binding, OB-fold IPR014722-Translation protein SH3-like, subgroup IPR005824-KOW	Biological Process: peptidyl-lysine modification to hypusine (GO:0008612), Biological Process: positive regulation of translational elongation (GO:0045901), Biological Process: positive regulation of translational termination (GO:0045905), Biological Process: translational frameshifting (GO:0006452), Molecular Function: ribosome binding (GO:0043022), Molecular Function: RNA binding (GO:0003723), …	bmy:Bm1_57565 Eukaryotic translation initiation factor 5A-2; K03263 translation initiation factor eIF-5A%162%89.5061728395062%2e-83	-	-	-		0	0	0	1	0	0	0	0	0	0	0	0	0	0	0	0	0	0
	GS_16337	-	-	-	-	Y		K02989-small subunit ribosomal protein S5e	IPR000235-Ribosomal protein S7 IPR023798-Ribosomal protein S7 domain IPR005716-Ribosomal protein S7, eukaryotic/archaeal IPR020606-Ribosomal protein S7, conserved site	Biological Process: translation (GO:0006412), Cellular Component: intracellular (GO:0005622), Cellular Component: ribosome (GO:0005840), Cellular Component: small ribosomal subunit (GO:0015935), Molecular Function: RNA binding (GO:0003723), Molecular Function: structural constituent of ribosome (GO:0003735)	bmy:Bm1_27835 40S ribosomal protein S5; K02989 small subunit ribosomal protein S5e%214%92.0560747663551%1e-114	-	-	-		0	0	0	1	0	0	0	0	0	0	0	0	0	0	0	0	0	0
	GS_16554	-	-	-	-	Y		K02921-large subunit ribosomal protein L37Ae	IPR002674-Ribosomal protein L37ae IPR011332-Ribosomal protein, zinc-binding domain IPR011331-Ribosomal protein L37ae/L37e, N-terminal	Biological Process: translation (GO:0006412), Cellular Component: intracellular (GO:0005622), Cellular Component: ribosome (GO:0005840), Molecular Function: structural constituent of ribosome (GO:0003735)	bmy:Bm1_52705 60S ribosomal protein L37a; K02921 large subunit ribosomal protein L37Ae%93%94.6236559139785%9e-44	-	-	-		0	0	0	1	0	0	0	0	0	0	0	0	0	0	0	0	0	0
	GS_16759	-	-	-	-	Y		K12845-U4/U6 small nuclear ribonucleoprotein SNU13	IPR004038-Ribosomal protein L7Ae/L30e/S12e/Gadd45 IPR018492-Ribosomal protein L7Ae/L8/Nhp2 family IPR004037-Ribosomal protein L7Ae conserved site IPR002415-H/ACA ribonucleoprotein complex, subunit Nhp2, eukaryote	Biological Process: ribosome biogenesis (GO:0042254), Cellular Component: nucleolus (GO:0005730), Cellular Component: ribonucleoprotein complex (GO:0030529), Molecular Function: RNA binding (GO:0003723)	sp|Q21568|NH2L1_CAEEL%%NHP2-like protein 1 homolog OS=Caenorhabditis elegans GN=M28.5 PE=2 SV=1%%8.3e-45	-	-	-		0	0	0	1	0	0	0	0	0	0	0	0	0	0	0	0	0	0
	GS_17517	-	-	-	-	Y		K00237-succinate dehydrogenase (ubiquinone) membrane anchor subunit	IPR007992-Cytochrome b, succinate dehydrogenase small subunit, CybS	Biological Process: tricarboxylic acid cycle (GO:0006099), Cellular Component: integral to membrane (GO:0016021), Cellular Component: mitochondrial envelope (GO:0005740), Molecular Function: heme binding (GO:0020037), Molecular Function: iron ion binding (GO:0005506)	bmy:Bm1_35660 Succinate dehydrogenase; K00237 succinate dehydrogenase (ubiquinone) membrane anchor subunit [EC:1.3.5.1]%157%58.5987261146497%6e-45	Y	-	-		0	0	0	1	0	0	0	0	0	0	0	0	0	0	0	0	0	0
	GS_17535	-	-	-	-	Y		-	IPR019133-Mitochondrial inner membrane protein Mitofilin	Cellular Component: integral to mitochondrial inner membrane (GO:0031305)	sp|Q16891|IMMT_HUMAN%%Mitochondrial inner membrane protein OS=Homo sapiens GN=IMMT PE=1 SV=1%%4.3e-74	-	-	-		0	0	0	1	0	0	0	0	0	0	0	0	0	0	0	0	0	0
	GS_17769	-	-	-	-	Y		K06237-collagen, type IV, alpha	IPR001442-Collagen IV, non-collagenous IPR008160-Collagen triple helix repeat IPR016187-C-type lectin fold	Cellular Component: collagen (GO:0005581), Molecular Function: binding (GO:0005488), Molecular Function: extracellular matrix structural constituent (GO:0005201)	bmy:Bm1_57370 Collagen alpha%1776%64.7522522522522%0.0	-	Y	-		0	0	0	1	0	0	0	0	0	0	0	0	0	0	0	0	0	0
	GS_17789	-	-	-	-	Y		K12199-vacuolar protein sorting-associated protein VTA1	IPR023175-Vacuolar protein sorting-associate Vta1, N-terminal IPR006745-Protein of unknown function DUF605	-	bmy:Bm1_35735 RhoGAP domain containing protein; K12199 vacuolar protein sorting-associated protein VTA1%294%53.4013605442177%6e-80	-	-	-		0	0	0	1	0	0	0	0	0	0	0	0	0	0	0	0	0	0
	GS_17861	-	-	-	-	Y		-	IPR002290-Serine/threonine-protein kinase domain IPR020635-Tyrosine-protein kinase, catalytic domain IPR017442-Serine/threonine-protein kinase-like domain IPR000719-Protein kinase, catalytic domain IPR008271-Serine/threonine-protein kinase, active site IPR011009-Protein kinase-like domain IPR017441-Protein kinase, ATP binding site	Biological Process: protein phosphorylation (GO:0006468), Molecular Function: ATP binding (GO:0005524), Molecular Function: protein kinase activity (GO:0004672), Molecular Function: protein serine/threonine kinase activity (GO:0004674), Molecular Function: transferase activity, transferring phosphorus-containing groups (GO:0016772)	ks-sarfari_kinase%mitogen-activated protein kinase kinase 7%STE%STE7%MEK7%9606%hMKK7_1367%267%40.8239700374532%4e-57	-	-	-		0	0	0	1	0	0	0	0	0	0	0	0	0	0	0	0	0	0
	GS_18324	-	-	-	-	Y		-	IPR016024-Armadillo-type fold IPR011989-Armadillo-like helical IPR000357-HEAT IPR001494-Importin-beta, N-terminal	Biological Process: intracellular protein transport (GO:0006886), Molecular Function: binding (GO:0005488), Molecular Function: protein binding (GO:0005515), Molecular Function: protein transporter activity (GO:0008565)	bmy:Bm1_33925 kap beta 3 protein%1102%77.6769509981851%0.0	-	-	Y		0	0	0	1	0	0	0	0	0	0	0	0	0	0	0	0	0	0
	GS_18363	-	-	-	-	Y		K12164-ubiquitin-like modifier-activating enzyme 5	IPR000594-UBA/THIF-type NAD/FAD binding fold IPR009036-Molybdenum cofactor biosynthesis, MoeB IPR016040-NAD(P)-binding domain	Molecular Function: binding (GO:0005488), Molecular Function: catalytic activity (GO:0003824)	bmy:Bm1_36180 CG1749-PA; K12164 ubiquitin-like modifier-activating enzyme 5%369%68.8346883468835%1e-141	-	-	Y		0	0	0	1	0	0	0	0	0	0	0	0	0	0	0	0	0	0
	GS_18456	-	-	-	-	Y		-	IPR002075-Nuclear transport factor 2 IPR018222-Nuclear transport factor 2, Eukaryote	Biological Process: transport (GO:0006810), Cellular Component: intracellular (GO:0005622)	bmy:Bm1_17200 nuclear transport factor 2 (NTF-2)%131%80.1526717557252%3e-58	-	-	-		0	0	0	1	0	0	0	0	0	0	0	0	0	0	0	0	0	0
	GS_18691	-	-	-	-	Y		K01922-phosphopantothenate-cysteine ligase	IPR007085-DNA/pantothenate metabolism flavoprotein, C-terminal	-	bmy:Bm1_45070 DNA / pantothenate metabolism flavoprotein%283%57.243816254417%4e-90	-	-	-		0	0	0	1	0	0	0	0	0	0	0	0	0	0	0	0	0	0
	GS_18935	-	-	-	-	Y		-	IPR010582-Catalase-related immune responsive IPR020835-Catalase-like domain, haem-dependent	Biological Process: oxidation-reduction process (GO:0055114), Biological Process: response to oxidative stress (GO:0006979), Molecular Function: catalase activity (GO:0004096), Molecular Function: heme binding (GO:0020037), Molecular Function: iron ion binding (GO:0005506)	sp|P90682|CATA_ASCSU%%Catalase OS=Ascaris suum GN=CAT PE=2 SV=2%%1.6e-48	-	-	-		0	0	0	1	0	0	0	0	0	0	0	0	0	0	0	0	0	0
	GS_19052	-	-	-	-	Y		K07977-Arf/Sar family, other	IPR006689-ARF/SAR superfamily IPR006687-Small GTPase SAR1-type IPR006688-ADP-ribosylation factor IPR003579-Ras small GTPase, Rab type IPR005225-Small GTP-binding protein domain	Biological Process: intracellular protein transport (GO:0006886), Biological Process: protein transport (GO:0015031), Biological Process: small GTPase mediated signal transduction (GO:0007264), Cellular Component: intracellular (GO:0005622), Molecular Function: GTP binding (GO:0005525)	GTPase%sar_1 %146%32.8767123287671%2e-22	-	-	-		0	0	0	1	0	0	0	0	0	0	0	0	0	0	0	0	0	0
	GS_19261	-	-	-	-	Y		K02962-small subunit ribosomal protein S17e	IPR001210-Ribosomal protein S17e	Biological Process: translation (GO:0006412), Cellular Component: intracellular (GO:0005622), Cellular Component: ribosome (GO:0005840), Molecular Function: structural constituent of ribosome (GO:0003735)	bmy:Bm1_14260 40S ribosomal protein S17; K02962 small subunit ribosomal protein S17e%83%66.2650602409639%1e-23	-	-	-		0	0	0	1	0	0	0	0	0	0	0	0	0	0	0	0	0	0
	GS_19340	-	-	-	-	Y		K02900-large subunit ribosomal protein L27Ae	IPR021131-Ribosomal protein L18e/L15P IPR001196-Ribosomal protein L15, conserved site	Biological Process: translation (GO:0006412), Cellular Component: intracellular (GO:0005622), Cellular Component: ribosome (GO:0005840), Molecular Function: structural constituent of ribosome (GO:0003735)	bmy:Bm1_04910 60S ribosomal protein L27a; K02900 large subunit ribosomal protein L27Ae%147%89.1156462585034%1e-73	-	-	-		0	0	0	1	0	0	0	0	0	0	0	0	0	0	0	0	0	0
	GS_19955	-	-	-	-	Y		-	IPR002108-Actin-binding, cofilin/tropomyosin type	Cellular Component: intracellular (GO:0005622), Molecular Function: actin binding (GO:0003779)	cel:C38C3.5 unc-60; UNCoordinated family member (unc-60)%210%74.2857142857143%8e-88	-	-	-		0	0	0	1	0	0	0	0	0	0	0	0	0	0	0	0	0	0
	GS_20145	-	-	-	-	Y		-	-	-	bmy:Bm1_31425 KH domain containing protein%88%70.4545454545455%1e-26	-	-	-		0	0	0	1	0	0	0	0	0	0	0	0	0	0	0	0	0	0
	GS_20185	-	-	-	-	Y		-	IPR001372-Dynein light chain, type 1/2	Biological Process: microtubule-based process (GO:0007017), Cellular Component: microtubule associated complex (GO:0005875)	sp|Q94748|DYL2_SCHMA%%Probable dynein light chain OS=Schistosoma mansoni PE=3 SV=1%%4.5e-40	-	-	-		0	0	0	1	0	0	0	0	0	0	0	0	0	0	0	0	0	0
	GS_20205	-	-	-	-	Y		K02259-cytochrome c oxidase assembly protein subunit 15	IPR003780-Heme A synthase/Protoheme IX farnesyltransferase IPR023754-Heme A synthase, type 2	Biological Process: heme a biosynthetic process (GO:0006784), Biological Process: protein complex assembly (GO:0006461), Cellular Component: membrane (GO:0016020)	bmy:Bm1_07665 Cytochrome oxidase assembly protein; K02259 cytochrome c oxidase subunit XV assembly protein%366%70.2185792349727%1e-155	Y	-	-		0	0	0	1	0	0	0	0	0	0	0	0	0	0	0	0	0	0
	GS_20655	-	-	-	-	Y		-	IPR005746-Thioredoxin IPR017936-Thioredoxin-like IPR012335-Thioredoxin fold IPR017937-Thioredoxin, conserved site IPR012336-Thioredoxin-like fold IPR013766-Thioredoxin domain	Biological Process: cell redox homeostasis (GO:0045454), Biological Process: glycerol ether metabolic process (GO:0006662), Molecular Function: electron carrier activity (GO:0009055), Molecular Function: protein disulfide oxidoreductase activity (GO:0015035)	sp|Q6NRT6|DJC10_XENLA%%DnaJ homolog subfamily C member 10 OS=Xenopus laevis GN=dnajc10 PE=2 SV=1%%7.3e-99	-	Y	-		0	0	0	1	0	0	0	0	0	0	0	0	0	0	0	0	0	0
	GS_20722	-	-	-	-	Y		K09290-tropomyosin 3	IPR000533-Tropomyosin	-	cbr:CBG19793 Cbr-lev-11; C. briggsae CBR-LEV-11 protein, isoform b%257%92.9961089494163%1e-116	-	-	-		0	0	0	1	0	0	0	0	0	0	0	0	0	0	0	0	0	0
	GS_20815	-	-	-	-	Y		K03964-NADH dehydrogenase (ubiquinone) 1 beta subcomplex 8	IPR008699-NADH:ubiquinone oxidoreductase, ASHI subunit	Cellular Component: mitochondrion (GO:0005739), Molecular Function: NADH dehydrogenase (ubiquinone) activity (GO:0008137), Molecular Function: NADH dehydrogenase activity (GO:0003954)	Channels and Transporters%gnl|TC-DB|Q02372%3%Primary active transporters%3.D.%Oxidoreduction-driven transporters%3.D.1%Oxidoreduction-driven transporters%3.D.1.6.1% H+ or Na+-translocating NADH Dehydrogenase (NDH) Family.%"NADH dehydrogenase [ubiquinone] 1 beta subcomplex subunit 8, mitochondrial - Bos taurus (Bovine)."%163%34.35582822%2.00E-11	Y	-	-		0	0	0	1	0	0	0	0	0	0	0	0	0	0	0	0	0	0
	GS_20911	-	-	-	-	Y		-	IPR015623-Actin-related protein 3 IPR004000-Actin-like	Biological Process: regulation of actin filament polymerization (GO:0030833), Cellular Component: cytoskeleton (GO:0005856), Molecular Function: actin binding (GO:0003779), Molecular Function: ATP binding (GO:0005524)	cbr:CBG04224 Cbr-arx-1; C. briggsae CBR-ARX-1 protein%426%72.5352112676056%0.0	-	-	Y		0	0	0	1	0	0	0	0	0	0	0	0	0	0	0	0	0	0
	GS_21852	-	-	-	-	Y		-	IPR011990-Tetratricopeptide-like helical	Molecular Function: binding (GO:0005488)	bmy:Bm1_26785 fis1-related protein%87%65.5172413793103%6e-27	-	-	-		0	0	0	1	0	0	0	0	0	0	0	0	0	0	0	0	0	0
	GS_21875	-	-	-	-	Y		K00325-NAD(P) transhydrogenase subunit beta	IPR004003-NAD(P) transhydrogenase, beta subunit	Biological Process: oxidation-reduction process (GO:0055114), Molecular Function: NAD(P)+ transhydrogenase activity (GO:0008746)	Channels and Transporters%gnl|TC-DB|P11024%3%Primary active transporters%3.D.%Oxidoreduction-driven transporters%3.D.2%Oxidoreduction-driven transporters%3.D.2.3.1% Proton-translocating Transhydrogenase (PTH) Family.%"NAD(P) TRANSHYDROGENASE, MITOCHONDRIAL PRECURSOR (EC 1.6.1.2) (PYRIDINE NUCLEOTIDE TRANSHYDROGENASE) (NICOTINAMIDE NUCLEOTIDE TRANSHYDROGENASE) - Bos taurus (Bovine)."%456%62.061403…	Y	-	-		0	0	0	1	0	0	0	0	0	0	0	0	0	0	0	0	0	0
	GS_21946	-	-	-	-	Y		K07826-guanine nucleotide-binding protein G(I)/G(S)/G(O) subunit gamma-2	IPR015898-G-protein gamma domain IPR001770-G-protein, gamma subunit	Biological Process: G-protein coupled receptor protein signaling pathway (GO:0007186), Cellular Component: heterotrimeric G-protein complex (GO:0005834), Molecular Function: signal transducer activity (GO:0004871)	bmy:Bm1_56285 GGL domain containing protein%73%75.3424657534247%1e-27	-	-	-		0	0	0	1	0	0	0	0	0	0	0	0	0	0	0	0	0	0
	GS_22275	-	-	-	-	Y		K09560-suppressor of tumorigenicity protein 13	IPR011990-Tetratricopeptide-like helical IPR001440-Tetratricopeptide TPR-1 IPR019734-Tetratricopeptide repeat IPR006636-Heat shock chaperonin-binding IPR013026-Tetratricopeptide repeat-containing	Molecular Function: binding (GO:0005488), Molecular Function: protein binding (GO:0005515)	Channels and Transporters%gnl|TC-DB|Q9MUK5%3%Primary active transporters%3.A.%P-P-bond-hydrolysis-driven transporters%3.A.9% Chloroplast Envelope Protein Translocase (CEPT or Tic-Toc) Family.%3.A.9.1.1% Chloroplast Envelope Protein Translocase (CEPT or Tic-Toc) Family.%Toc64 - Pisum sativum (Garden pea).%128%29.6875%3.00E-08	-	-	-		0	0	0	1	0	0	0	0	0	0	0	0	0	0	0	0	0	0
	GS_22447	-	-	-	-	Y		-	IPR001023-Heat shock protein Hsp70	Molecular Function: ATP binding (GO:0005524)	bmy:Bm1_39345 dnaK protein; K09486 hypoxia up-regulated 1%385%44.9350649350649%8e-86	-	-	-		0	0	0	1	0	0	0	0	0	0	0	0	0	0	0	0	0	0
	GS_22738	-	-	-	-	Y		K00948-ribose-phosphate pyrophosphokinase	IPR005946-Ribose-phosphate diphosphokinase IPR000842-Phosphoribosyl pyrophosphate synthetase, conserved site IPR000836-Phosphoribosyltransferase	Biological Process: cellular biosynthetic process (GO:0044249), Biological Process: nucleoside metabolic process (GO:0009116), Biological Process: nucleotide biosynthetic process (GO:0009165), Biological Process: ribonucleoside monophosphate biosynthetic process (GO:0009156), Molecular Function: magnesium ion binding (GO:0000287), Molecular Function: ribose phosphate diphosphokinase activity (GO:…	bmy:Bm1_12765 ribose-phosphate diphosphokinase; K00948 ribose-phosphate pyrophosphokinase [EC:2.7.6.1]%324%94.4444444444444%1e-180	-	-	Y		0	0	0	1	0	0	0	0	0	0	0	0	0	0	0	0	0	0
	GS_22936	-	-	-	-	Y		K01251-adenosylhomocysteinase	IPR020082-S-adenosyl-L-homocysteine hydrolase, conserved site IPR016040-NAD(P)-binding domain IPR015878-S-adenosyl-L-homocysteine hydrolase, NAD binding IPR000043-Adenosylhomocysteinase	Biological Process: one-carbon metabolic process (GO:0006730), Molecular Function: adenosylhomocysteinase activity (GO:0004013), Molecular Function: binding (GO:0005488)	aag:AaeL_AAEL008341 adenosylhomocysteinase ; K01251 adenosylhomocysteinase [EC:3.3.1.1]%490%68.9795918367347%0.0	-	-	Y		0	0	0	1	0	0	0	0	0	0	0	0	0	0	0	0	0	0
	GS_23085	-	-	-	-	Y		K05767-IQ motif containing GTPase activating protein	IPR001715-Calponin homology domain	Molecular Function: protein binding (GO:0005515)	GTPase%pes_7 %153%54.9019607843137%4e-51	-	-	-		0	0	0	1	0	0	0	0	0	0	0	0	0	0	0	0	0	0
	GS_23125	-	-	-	-	Y		K06099-cold shock domain protein A	IPR016027-Nucleic acid-binding, OB-fold-like IPR002059-Cold-shock protein, DNA-binding IPR012340-Nucleic acid-binding, OB-fold IPR011129-Cold shock protein IPR019844-Cold-shock conserved site	Biological Process: regulation of transcription, DNA-dependent (GO:0006355), Molecular Function: DNA binding (GO:0003677), Molecular Function: nucleic acid binding (GO:0003676)	bmy:Bm1_57515 'Cold-shock' DNA-binding domain containing protein%79%92.4050632911392%1e-36	-	-	-		0	0	0	1	0	0	0	0	0	0	0	0	0	0	0	0	0	0
	GS_23270	-	-	-	-	Y		K11275-histone H1/5	IPR011991-Winged helix-turn-helix transcription repressor DNA-binding IPR005818-Histone H1/H5 IPR005819-Histone H5	Biological Process: nucleosome assembly (GO:0006334), Cellular Component: nucleosome (GO:0000786), Cellular Component: nucleus (GO:0005634), Molecular Function: DNA binding (GO:0003677)	bmy:Bm1_04110 linker histone H1 and H5 family protein; K11275 histone H1/5%129%55.8139534883721%8e-28	-	-	-		0	0	0	1	0	0	0	0	0	0	0	0	0	0	0	0	0	0
	GS_23277	-	-	-	-	Y		-	-	-	bmy:Bm1_56040 failed axon connections protein%176%43.75%1e-37	-	-	-		0	0	0	1	0	0	0	0	0	0	0	0	0	0	0	0	0	0
	GS_23579	-	-	-	-	Y		-	IPR001199-Cytochrome b5	Molecular Function: heme binding (GO:0020037)	bmy:Bm1_26935 Cytochrome b5-like Heme/Steroid binding domain containing protein%171%55.5555555555556%2e-40	Y	-	-		0	0	0	1	0	0	0	0	0	0	0	0	0	0	0	0	0	0
	GS_23613	-	-	-	-	Y		K08272-calcium binding protein 39	IPR016024-Armadillo-type fold IPR011989-Armadillo-like helical IPR013878-Mo25-like	Molecular Function: binding (GO:0005488)	bmy:Bm1_33380 Cab39 protein; K08272 calcium binding protein 39%336%81.25%1e-155	-	-	Y		0	0	0	1	0	0	0	0	0	0	0	0	0	0	0	0	0	0
	GS_24008	-	-	-	-	Y		-	IPR001753-Crotonase, core IPR018376-Enoyl-CoA hydratase/isomerase, conserved site	Biological Process: metabolic process (GO:0008152), Molecular Function: catalytic activity (GO:0003824)	cin:100185648 similar to Methylglutaconyl-CoA hydratase, mitochondrial precursor (AU-specific RNA-binding enoyl-CoA hydratase) (AU-binding protein/enoyl-CoA hydratase); K05607 methylglutaconyl-CoA hydratase [EC:4.2.1.18]%223%52.0179372197309%1e-59	-	-	-		0	0	0	1	0	0	0	0	0	0	0	0	0	0	0	0	0	0
	GS_24226	-	-	-	-	Y		-	IPR001478-PDZ/DHR/GLGF	Molecular Function: protein binding (GO:0005515)	bmy:Bm1_49575 interleukin-16%278%56.8345323741007%1e-84	-	-	-		0	0	0	1	0	0	0	0	0	0	0	0	0	0	0	0	0	0
	GS_24336	-	-	-	-	Y		K14729-multifunctional beta-oxidation protein	IPR002198-Short-chain dehydrogenase/reductase SDR IPR020904-Short-chain dehydrogenase/reductase, conserved site IPR002347-Glucose/ribitol dehydrogenase IPR016040-NAD(P)-binding domain IPR003033-SCP2 sterol-binding domain	Biological Process: metabolic process (GO:0008152), Biological Process: oxidation-reduction process (GO:0055114), Molecular Function: binding (GO:0005488), Molecular Function: oxidoreductase activity (GO:0016491), Molecular Function: sterol binding (GO:0032934)	cel:M03A8.1 dhs-28; DeHydrogenases, Short chain family member (dhs-28)%249%46.1847389558233%1e-66	Y	-	Y		0	0	0	1	0	0	0	0	0	0	0	0	0	0	0	0	0	0
	L3E_00334	-	-	-	-	Y		-	IPR008927-6-phosphogluconate dehydrogenase, C-terminal-like IPR013328-Dehydrogenase, multihelical	Molecular Function: coenzyme binding (GO:0050662), Molecular Function: oxidoreductase activity (GO:0016491)	-	-	-	-		0	0	0	1	0	0	0	0	0	0	0	0	0	0	0	0	0	0
	GS_06926	-	-	-	-	Y		-	IPR001464-Annexin IPR018252-Annexin repeat, conserved site IPR018502-Annexin repeat	Molecular Function: calcium ion binding (GO:0005509), Molecular Function: calcium-dependent phospholipid binding (GO:0005544)	Channels and Transporters%gnl|TC-DB|P08133%1%Channel/pores%1.A.%alpha-type channels%1.A.3% Voltage-gated Ion Channel (VIC) Superfamily .%1.A.31.1.2%" Annexin (Annexin) Family.; Ryanodine-Inositol 1,4,5-triphosphate Receptor Ca2+ Channel (RIR-CaC) Family."%Annexin A6 (Annexin VI) (Lipocortin VI) (P68) (P70) (Protein III) (Chromobindin 20) (67 kDa calelectrin) (Calphobindin-II) (CPB-II) - Homo sapi…	-	-	-		0	0	0	14	0	0	0	0	0	0	0	0	0	0	0	0	0	0
	GS_23399	-	-	-	-	Y		-	IPR001464-Annexin IPR018252-Annexin repeat, conserved site IPR018502-Annexin repeat	Molecular Function: calcium ion binding (GO:0005509), Molecular Function: calcium-dependent phospholipid binding (GO:0005544)	Channels and Transporters%gnl|TC-DB|P08133%1%Channel/pores%1.A.%alpha-type channels%1.A.3% Voltage-gated Ion Channel (VIC) Superfamily .%1.A.31.1.2%" Annexin (Annexin) Family.; Ryanodine-Inositol 1,4,5-triphosphate Receptor Ca2+ Channel (RIR-CaC) Family."%Annexin A6 (Annexin VI) (Lipocortin VI) (P68) (P70) (Protein III) (Chromobindin 20) (67 kDa calelectrin) (Calphobindin-II) (CPB-II) - Homo sapi…	-	-	-		0	0	0	8	0	0	0	0	0	0	0	0	0	0	0	0	0	0
